# Supplementary material for: Ligand -controlled nickel-catalyzed C–O bond cleavage of silyl enol ether for the divergent synthesis of aryl alkenes and silicon-containing product
Source: Royal Society of Chemistry journal article supplement (doi:10.1039/d4qo01906g), 2024-11-27
Supplement: d4qo01906g1.pdf [file d4qo01906g1.pdf]

## Supporting Information

# Ligand-Controlled Nickel-Catalyzed C–O Bond Cleavage of Silyl Enol Ether for the Divergent Synthesis of Aryl Alkenes and Silicon-Containing Product

Shunqin Chang,<sup>‡a</sup> Yueping Lin,<sup>‡a</sup> Pei Gu,<sup>b</sup> Changhui Lu,<sup>a</sup> Minyan Wang,<sup>b,\*</sup> Liangbin Huang<sup>a,\*</sup>

<sup>a</sup> State Key Laboratory of Pulp and Paper Engineering and Key Laboratory of Functional Molecular Engineering of Guangdong Province in School of Chemistry and Chemical Engineering, South China University of Technology, Guangzhou 510640, P. R. China.

<sup>b</sup> State Key Laboratory of Coordination Chemistry, School of Chemistry and Chemical Engineering, Nanjing University, Nanjing 210093, P. R. China

## Table of Contents

|                                                       |     |
|-------------------------------------------------------|-----|
| I. General Information.....                           | 3   |
| II. Optimization Study.....                           | 5   |
| III. Methods for the Synthesis.....                   | 10  |
| IV. Gram Scale Reactions .....                        | 13  |
| V. The Mechanism Researches and DFT Calculation ..... | 14  |
| VI. Analysis Data for the Products .....              | 120 |
| VII. Unsuccessful substrate.....                      | 137 |
| VIII. NMR Spectra of Compounds .....                  | 137 |
| IX. Reference .....                                   | 193 |

## I. General Information

### Reagents

All compounds were used as received unless otherwise noted.

### Metals and Ligand:

All metal catalysts and ligands, unless otherwise noted, were stored and handled in a nitrogen-filled glovebox. Ni(cod)<sub>2</sub> was purchased from *Energy Chemical* and used as received. Other catalyst in condition optimization table were Ni(acac)<sub>2</sub> (*Energy Chemical*), NiBr<sub>2</sub>(dme) (*Energy Chemical*) and Ni(OTf)<sub>2</sub> (*Energy Chemical*). The ligands used were PCy<sub>3</sub> (*Laajoo*), PPh<sub>3</sub> (*Energy Chemical*), P<sup>t</sup>Bu<sub>3</sub> (*Energy Chemical*), Xantphos (*Bidepharm*), DPPF (*Bidepharm*), bpy (*Laajoo*), ICy-HCl (*Innochem*), IPr-HCl (*Energy Chemical*), **L13** (*Laajoo*), **L14** (*Innochem*), **L15** (*Bidepharm*).

### Solvents:

The solvent 1,4-dioxane, CH<sub>3</sub>CN, toluene, DMF and cyclopentyl methyl ether (CPME) were purchased from *Energy Chemical*. Tetrahydrofuran (THF) was distilled from sodium/benzophenone and stored under nitrogen before use.

### Analytical Methods

<sup>1</sup>H nuclear magnetic resonance (NMR) spectroscopy chemical shifts are reported in ppm and referenced to TMS (tetramethylsilane) in CDCl<sub>3</sub> (δ = 0 ppm) or the residual solvent peak for CDCl<sub>3</sub> (δ = 7.26 ppm). For <sup>13</sup>C NMR chemical shifts, the residual solvent peak (CDCl<sub>3</sub>, δ = 77.00 ppm) were used as references. NMR spectra were recorded on Avance Bruker NMR spectrometers operating at either 400 MHz or 500 MHz and data analysis was performed using the MestReNova software. Chemical shifts are reported in parts per million (ppm), multiplicities are indicated by s (singlet), d (doublet), t (triplet), q (quartet), m (multiplet) and br (broad). Coupling constants (J) are reported in Hertz. Melting points were measured using a melting point instrument. IR spectra were obtained with an infrared spectrometer on either potassium bromide

pellets or liquid films between two potassium bromide pellets. GC analyses were performed on an Agilent 7890B GC equipped with HP-5 columns (30 m × 320 μm × 0.25 μm), FID detectors, and hydrogen as the carrier gas. A sample volume of 1 μL was injected at a temperature of 250 °C and a 15:1 split ratio. The initial inlet pressure was 2.7 psi but varied as the column flow was held constant at 1 mL/min for the duration of the run. The initial oven temperature of 60 °C was held for 0 min followed by a temperature ramp of 50 °C/min up to 300 °C. The temperature was held at 300 °C for 6 min. The total run time was ~10.8 min and the FID temperature was 300 °C. GC/MS analyses were performed on a Shimadzu GCMS-QP2010SE equipped with an RTX-5MS column (30 m × 0.25 mm × 0.25 μm) with a quadrupole mass analyzer using helium as the carrier gas. The analysis method used in all cases was 5 μL injection of sample, an injection temp of 250 °C, and no split ratio. The initial inlet pressure was 7.8 psi, but varied as the column flow was held constant at 1.7 mL/min for the duration of the run. The interface temperature was held at 250 °C, and the ion source (EI+, 30 eV) was held at 250 °C. The initial oven temperature was held at 50 °C for 1 min with the detector off, followed by a temperature ramp, with the detector on, to 250 °C at 30 °C /min. The temperature was held at 250 °C for 0 min, then to 280 °C and held for 7 min. Total run time was 16.2 min. High resolution mass spectra (HRMS) was carried out on an electrospray (ESI+) ionization methods (ESI-quadrupole). Thin layer chromatography was performed on TLC Silica Gel 60 F254 plates. Visualization was accomplished with potassium permanganate after inspection under UV light. Flash chromatography was performed using silica gel 60, particle size 0.040-0.063 mm using standard flash techniques.

## **Procedure**

All reactions were conducted in oven-dried Schlenk tubes. All the reaction temperatures reported are oil bath temperatures. Unless otherwise specified, all reactions are carried out in nitrogen atmosphere.





**Table S3. Screening of reaction conditions for synthesis of benzylic silane silane<sup>a</sup>**

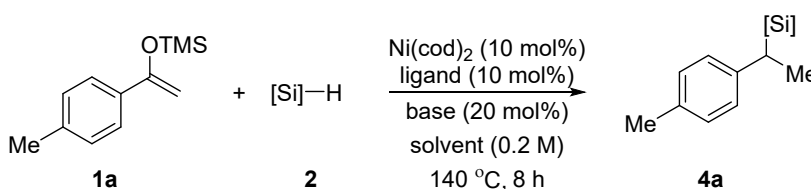

| Entry           | [Si]-H                           | Ligand | Base                            | Solvent            | Yield (%) <sup>b</sup> |
|-----------------|----------------------------------|--------|---------------------------------|--------------------|------------------------|
| 1               | Et <sub>3</sub> SiH              | L5     | LiO <sup>t</sup> Bu             | 1,4-dioxane        | 62                     |
| 2               | (EtO) <sub>3</sub> SiH           | L5     | LiO <sup>t</sup> Bu             | 1,4-dioxane        | n.d.                   |
| 3               | <sup>i</sup> Pr <sub>3</sub> SiH | L5     | LiO <sup>t</sup> Bu             | 1,4-dioxane        | n.d.                   |
| 4               | (EtO) <sub>2</sub> MeSiH         | L5     | LiO <sup>t</sup> Bu             | 1,4-dioxane        | n.d.                   |
| 5               | Ph <sub>2</sub> MeSiH            | L5     | LiO <sup>t</sup> Bu             | 1,4-dioxane        | n.d.                   |
| 6               | PhSiH <sub>3</sub>               | L5     | LiO <sup>t</sup> Bu             | 1,4-dioxane        | n.d.                   |
| 7               | Et <sub>3</sub> SiH              | L9     | LiO <sup>t</sup> Bu             | 1,4-dioxane        | 45                     |
| 8               | Et <sub>3</sub> SiH              | L10    | LiO <sup>t</sup> Bu             | 1,4-dioxane        | n.d.                   |
| 9               | Et <sub>3</sub> SiH              | L11    | LiO <sup>t</sup> Bu             | 1,4-dioxane        | 21                     |
| 10              | Et <sub>3</sub> SiH              | L12    | LiO <sup>t</sup> Bu             | 1,4-dioxane        | n.d.                   |
| 11              | Et <sub>3</sub> SiH              | L13    | LiO <sup>t</sup> Bu             | 1,4-dioxane        | trace                  |
| 12              | Et <sub>3</sub> SiH              | L14    | LiO <sup>t</sup> Bu             | 1,4-dioxane        | n.d.                   |
| 13              | Et <sub>3</sub> SiH              | L15    | LiO <sup>t</sup> Bu             | 1,4-dioxane        | n.d.                   |
| 14              | Et <sub>3</sub> SiH              | L5     | KO <sup>t</sup> Bu              | 1,4-dioxane        | trace                  |
| 15              | Et <sub>3</sub> SiH              | L5     | NaO <sup>t</sup> Bu             | 1,4-dioxane        | 4                      |
| 16              | Et <sub>3</sub> SiH              | L5     | Cs <sub>2</sub> CO <sub>3</sub> | 1,4-dioxane        | 6                      |
| 17              | Et <sub>3</sub> SiH              | L5     | K <sub>3</sub> PO <sub>4</sub>  | 1,4-dioxane        | n.d.                   |
| 18              | Et <sub>3</sub> SiH              | L5     | LiO <sup>t</sup> Bu             | THF                | 35                     |
| 19              | Et <sub>3</sub> SiH              | L5     | LiO <sup>t</sup> Bu             | CPME               | 43                     |
| 20              | Et <sub>3</sub> SiH              | L5     | LiO <sup>t</sup> Bu             | toluene            | 15                     |
| 21              | Et <sub>3</sub> SiH              | L5     | LiO <sup>t</sup> Bu             | CH <sub>3</sub> CN | trace                  |
| 22              | Et <sub>3</sub> SiH              | L5     | LiO <sup>t</sup> Bu             | DMF                | trace                  |
| 23 <sup>c</sup> | Et <sub>3</sub> SiH              | L5     | LiO <sup>t</sup> Bu             | 1,4-dioxane        | 43                     |

<sup>a</sup>Reaction conditions: **1a** (0.1 mmol), [Si]-H **2** (4 equiv), catalyst (10 mol%), ligand (10 mol%), base (20 mol%), solvent (0.5 mL). <sup>b</sup>Determined by GC analysis with *n*-

dodecane as an internal standard.  $c_{120}^{\circ}\text{C}$ .

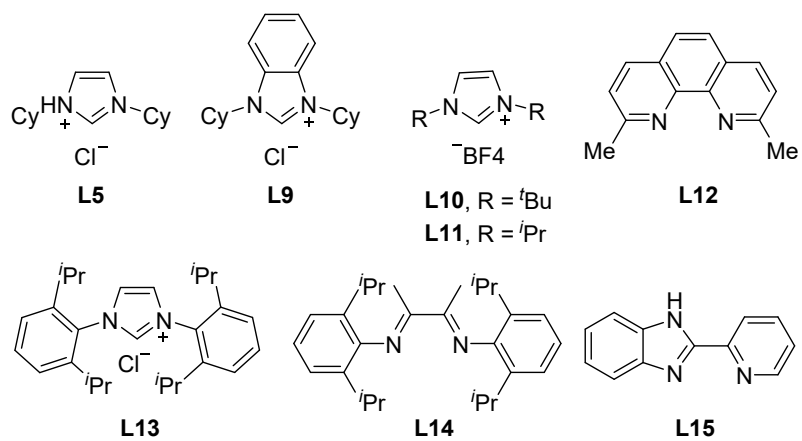



**Table S4. Screening of reaction conditions for synthesis of vinyl silane<sup>a</sup>**

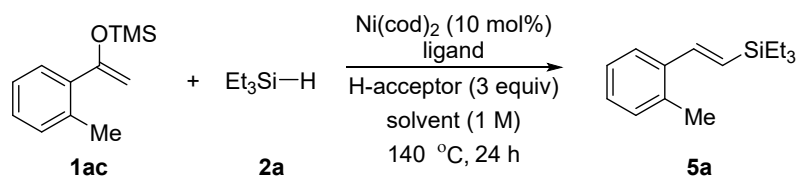

| Entry | Ligand                                   | H-acceptor<br>(3 equiv) | Solvent<br>(0.1 mL) | Yield (%) <sup>b</sup> |
|-------|------------------------------------------|-------------------------|---------------------|------------------------|
| 1     | PCy <sub>3</sub> (20 mol%)               | 1-octene                | 1,4-dioxane         | 3                      |
| 2     | PPh <sub>3</sub> (20 mol%)               | 1-octene                | 1,4-dioxane         | n.d.                   |
| 3     | P <sup>t</sup> Bu <sub>3</sub> (20 mol%) | 1-octene                | 1,4-dioxane         | n.d.                   |
| 4     | dppe (10 mol%)                           | 1-octene                | 1,4-dioxane         | n.d.                   |
| 5     | ICy-HCl (10 mol%)                        | 1-octene                | 1,4-dioxane         | n.d.                   |
| 6     | PCy <sub>3</sub> (20 mol%)               | NBE                     | 1,4-dioxane         | 39                     |
| 7     | PCy <sub>3</sub> (20 mol%)               | styrene                 | 1,4-dioxane         | n.d.                   |
| 8     | PCy <sub>3</sub> (20 mol%)               | 1-octene                | CPME                | 72(69) <sup>c</sup>    |
| 9     | PCy <sub>3</sub> (20 mol%)               | 1-octene                | THF                 | 10                     |
| 10    | PCy <sub>3</sub> (20 mol%)               | 1-octene                | toluene             | n.d.                   |

<sup>a</sup>Reaction conditions: **1ac** (0.1 mmol), **2a** (5 equiv), Ni(cod)<sub>2</sub> (10 mol%), ligand, H-acceptor (3 equiv), solvent (0.1 mL). <sup>b</sup>Determined by GC analysis with *n*-dodecane as an internal standard. <sup>c</sup>Isolated yield.

### III. Methods for the Synthesis.

#### (1) General Procedure A: Synthesis of silyl enol ether **1**

The silyl enol ether compounds used here were synthesized according to known protocols.<sup>1</sup> A 100 mL round-bottom flask containing mixture of the corresponding ketone (25 mmol) and sodium iodide (30 mmol, 4.5 g) was evacuated and backfilled with argon three times. Dry acetonitrile (30 mL) was added and the mixture stirred for 5 min at room temperature. After this, triethylamine (30 mmol, 4.2 mL) and chlorotrimethylsilane (30 mmol, 3.82 mL) were added. The reaction mixture was stirred overnight at room temperature. After the reaction, the reaction liquid is evaporated and petroleum ether is added. The filtrate obtained by filtering is silyl enol ether after concentration, which can be used without purification.

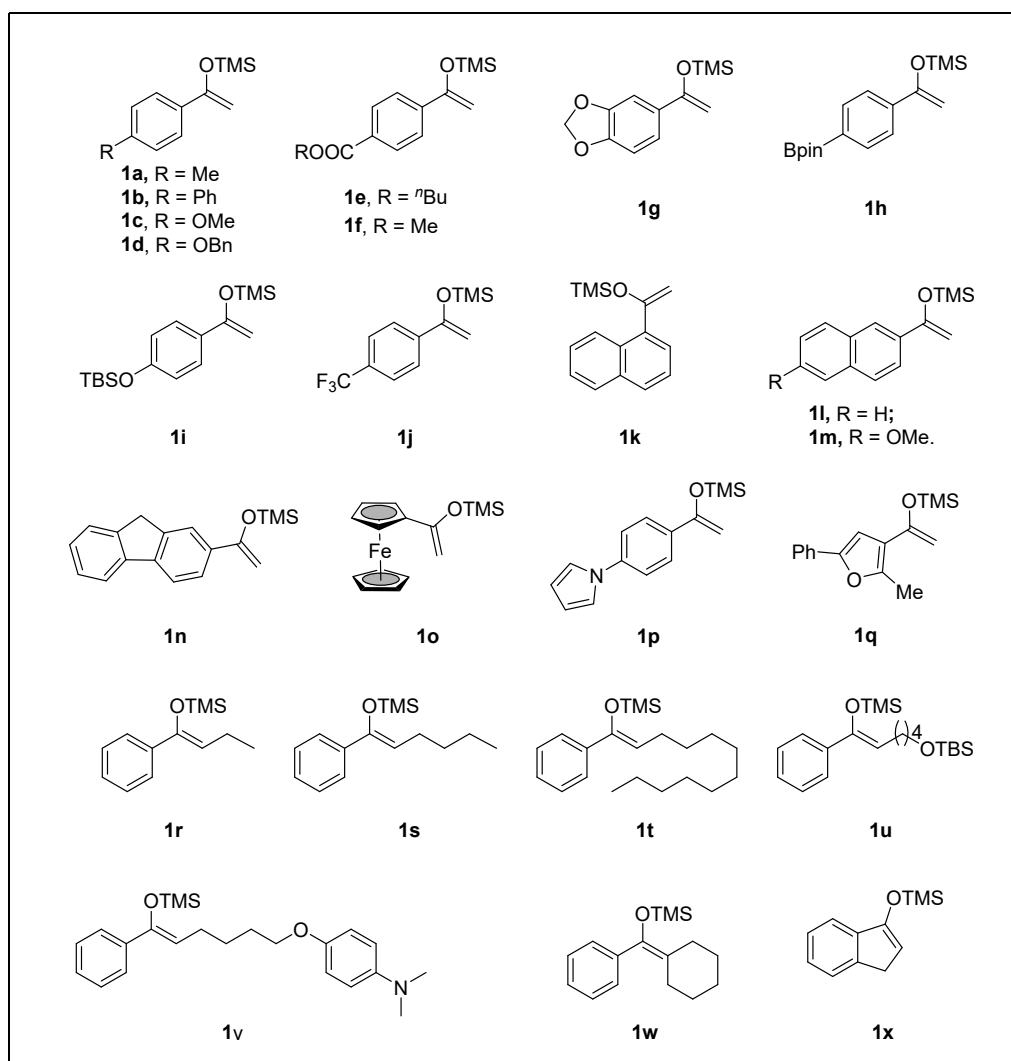

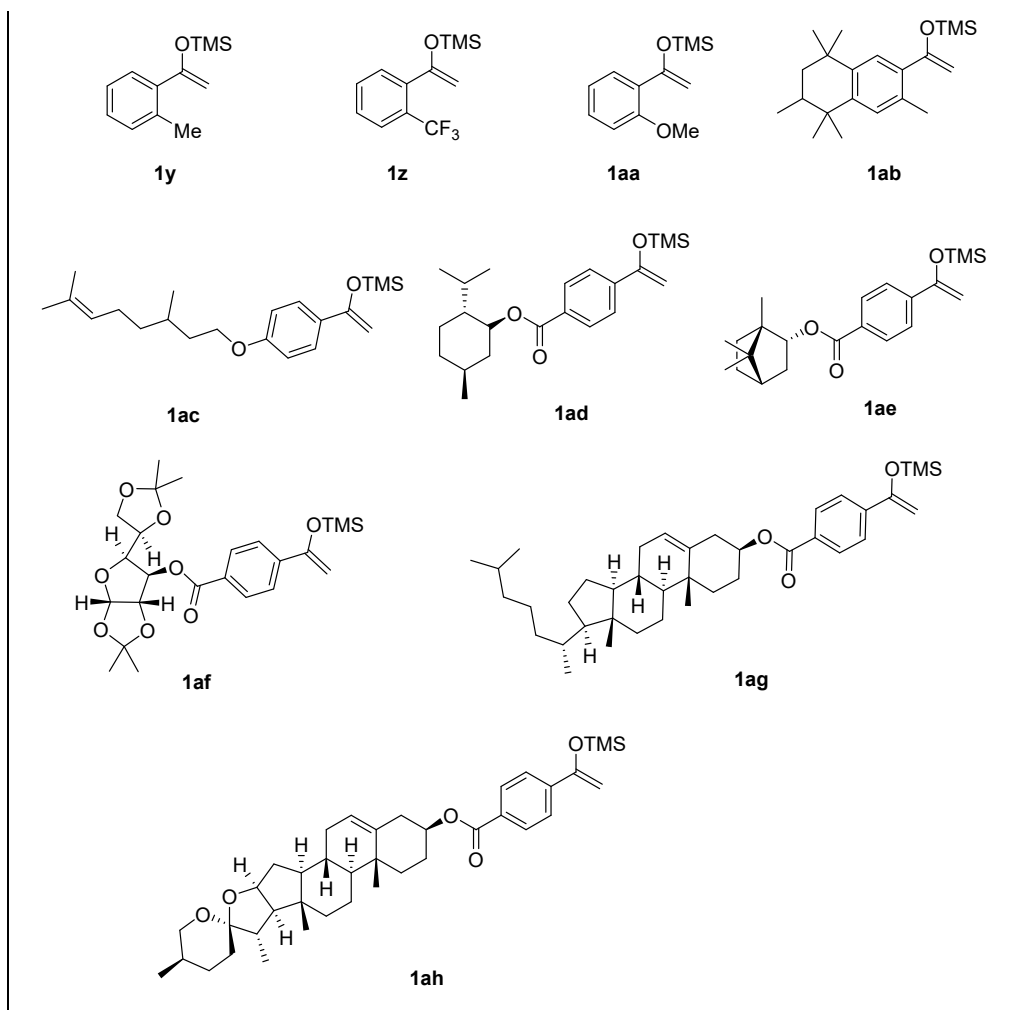

## (2) Procedure B: Synthesis of silyl enol ethers **1ai**

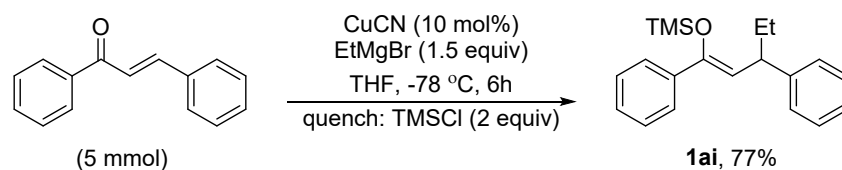

Copper cyanide (0.5 mmol, 10 mol%, 44.5 mg) was added to a flame-dried Schlenk flask followed by anhydrous tetrahydrofuran (0.3 M) and the mixture was stirred at room temperature for 10 min. The mixture was cooled to  $-78^{\circ}\text{C}$  and subsequently the appropriate Grignard reagent (7.5 mmol, 1.5 equiv) was added dropwise. The reaction mixture was stirred at  $-78^{\circ}\text{C}$  for an additional 10 min. After this time, a solution of trans-chalcone (5 mmol, 1.0 equiv, 1.04g) in anhydrous tetrahydrofuran (1 M) was added dropwise over 1 h. The reaction mixture was stirred for 6 h and the resulting enolate was quenched by the addition of chlorotrimethylsilane (10 mmol, 2 equiv,

1.08 g), allowing the system to reach room temperature while stirring for additional 1 h. After this time, saturated aqueous solution of ammonium chloride was added to the reaction mixture and the layers were separated. The aqueous layer was extracted with ethyl acetate (three times). The combined organic layers were dried over magnesium sulfate, filtered and the solvent was evaporated under reduced pressure.

**(3) General Procedure C: Synthesis of olefin from silyl enol ethers**

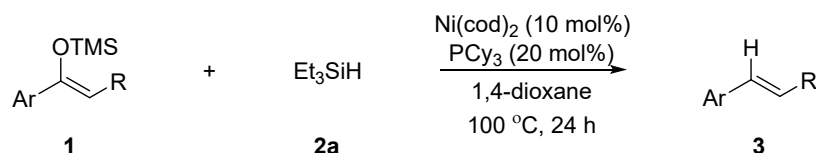

To an oven-dried 10-mL sealed tube equipped with a magnetic stir bar were subsequently added with Ni(cod)<sub>2</sub> (10 mol%), PCy<sub>3</sub> (20 mol%), Et<sub>3</sub>SiH **2a** (1 mmol) and silyl enol ether **1** (0.5 mmol), then 1,4-dioxane (5 mL) was added, the mixture was stirred at 100 °C for 24 h. After the reaction, the reaction was quenched by ethyl acetate (1.5 mL) and evaporated. The desired products **3** were purified by flash chromatography on silica gel (petroleum ether/EtOAc = pure PE - 10:1).

**(4) General Procedure D: Synthesis of benzyl silane from silyl enol ethers**

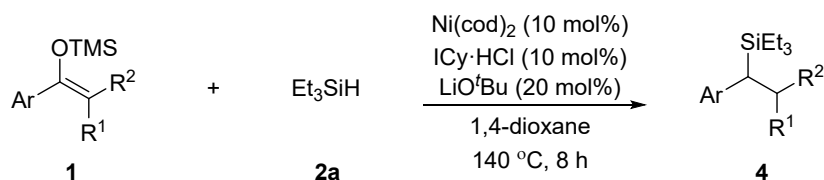

To an oven-dried 10-mL sealed tube equipped with a magnetic stir bar were subsequently added with Ni(cod)<sub>2</sub> (10 mol%), ICy·HCl (10 mol%), LiO<sup>t</sup>Bu (20 mol%), 1,4-dioxane (2.5 mL) was added and the mixture was stirred at room temperature for 5min. Then Et<sub>3</sub>SiH **2a** (2 mmol) and silyl enol ether **1** (0.5 mmol), the mixture was stirred at 140 °C for 8 h. After the reaction, the reaction was quenched by ethyl acetate (1.5 mL) and evaporated. The desired products **4** were purified by flash chromatography on silica gel (petroleum ether/EtOAc = pure PE - 10:1).

**(5) General Procedure E: Synthesis of alkenyl silane from silyl enol ethers**

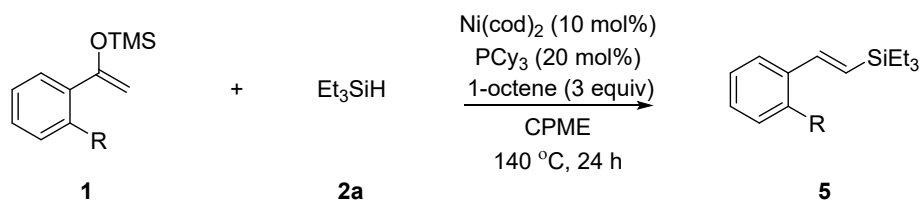

To an oven-dried 10-mL sealed tube equipped with a magnetic stir bar were subsequently added with Ni(cod)<sub>2</sub> (10 mol%), PCy<sub>3</sub> (20 mol%), Et<sub>3</sub>SiH **2a** (2.5 mmol), 1-octene (3 equiv) and silyl enol ether **1** (0.5 mmol), then CPME (cyclopentyl methyl ether) (0.5 mL) was added, the mixture was stirred at 140 °C for 24 h. After the reaction, the reaction was quenched by ethyl acetate (1 mL) and evaporated. The desired products **5** were purified by flash chromatography on silica gel (petroleum ether/EtOAc = PE - 20:1).

## IV. Gram Scale Reactions

### a) Hydrogenation of Silicon Enol Ether

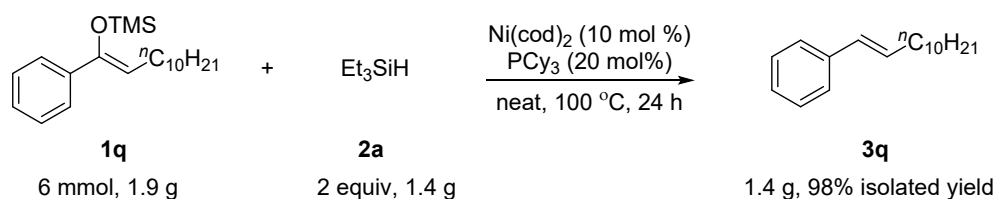

To an oven-dried 10-mL sealed tube equipped with a magnetic stir bar were subsequently added with Ni(cod)<sub>2</sub> (10 mol%), PCy<sub>3</sub> (20 mol%), Et<sub>3</sub>SiH (12 mmol) and **1q** (6 mmol), the mixture was stirred at 100 °C for 24 h. After the reaction, the reaction was quenched by ethyl acetate (3 mL) and evaporated. The desired products **3q** (1.4 g, 98% yield) were purified by flash chromatography on silica gel with petroleum ether.

### b) Hydrosilylation of Silicon Enol Ether

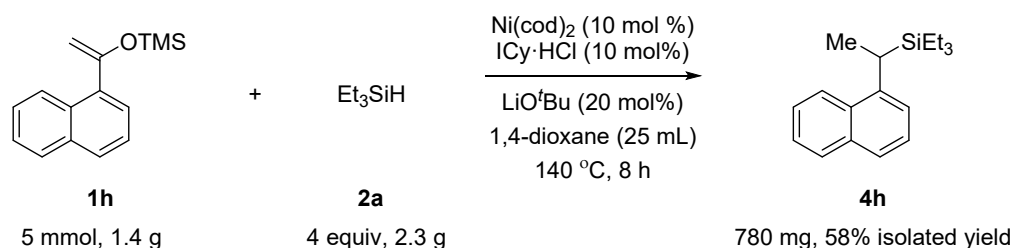

To an oven-dried 100-mL round bottom flask equipped with a magnetic stir bar were subsequently added with Ni(cod)<sub>2</sub> (10 mol%), ICy·HCl (10 mol%), LiO<sup>t</sup>Bu (20 mol%), 1,4-dioxane (25 mL) was added and the mixture was stirred at room temperature for 5 min. Then Et<sub>3</sub>SiH (20 mmol) and **1h** (5 mmol), the mixture was stirred at 140 °C for 8 h. After the reaction, the reaction was quenched by ethyl acetate (10 mL) and evaporated. The desired products **4h** (780 mg, 58% yield) were purified by flash chromatography on silica gel with petroleum ether.

## V. The Mechanism Researches and DFT Calculation

### a) EPR experiments

To an oven-dried 10-mL sealed tube equipped with a magnetic stir bar were subsequently added with Ni(cod)<sub>2</sub> (10 mol%), PCy<sub>3</sub> (20 mol%), **1a** (0.5 mmol) and Et<sub>3</sub>SiH (1.0 mmol), then 1,4-dioxane (0.5 mL) was added, the mixture was stirred at 100 °C for 3 h. After cooling, 0.2 mL of this solution was subjected to EPR measurements at 100 K under N<sub>2</sub>.

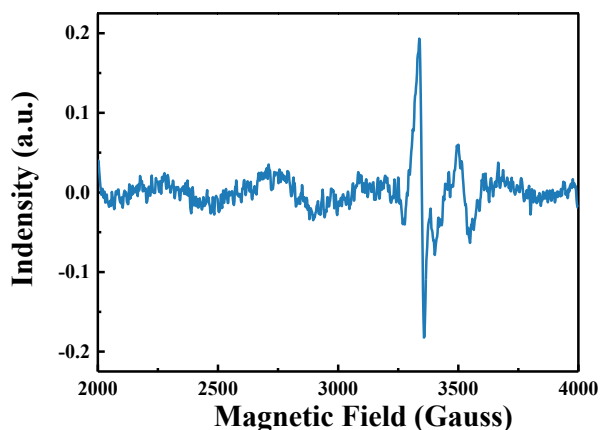

To an oven-dried 10-mL sealed tube equipped with a magnetic stir bar were subsequently added with Ni(cod)<sub>2</sub> (10 mol%), ICy·HCl (10 mol%), LiOtBu (20 mol%), **1a** (0.5 mmol) and Et<sub>3</sub>SiH (2.0 mmol), then 1,4-dioxane (0.5 mL) was added, the mixture was stirred at 140 °C for 6 h. After cooling, 0.2 mL of this solution was subjected to EPR measurements at 100 K under N<sub>2</sub>.

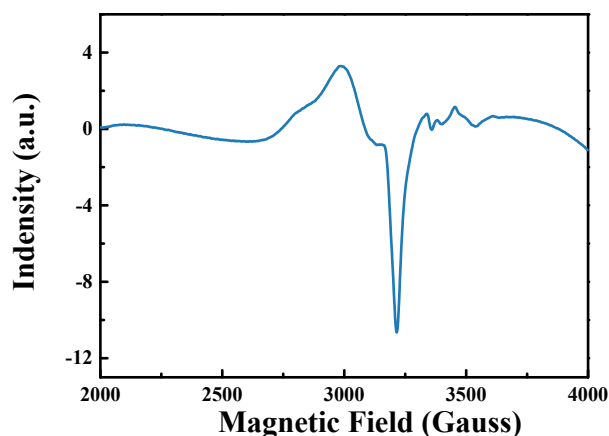

As shown in the figures, characteristic EPR spectra for Ni(I) species were obtained.

### b) Deuterium-labeling experiment

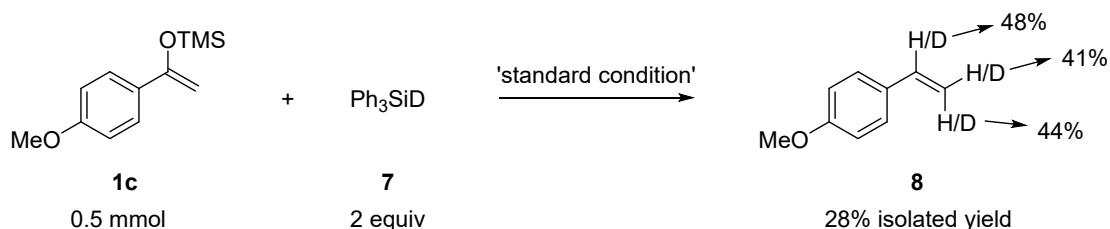

To an oven-dried 10-mL sealed tube equipped with a magnetic stir bar were subsequently added with Ni(cod)<sub>2</sub> (10 mol%), PCy<sub>3</sub> (20 mol%), **7** (1 mmol) and **1c** (0.5 mmol), then 1,4-dioxane (5 mL) was added, the mixture was stirred at 100 °C for 24 h. After the reaction, the reaction was quenched by ethyl acetate (2 mL) and evaporated. The desired products **8** were purified by flash chromatography on silica gel (petroleum ether/EtOAc = PE - 10:1).

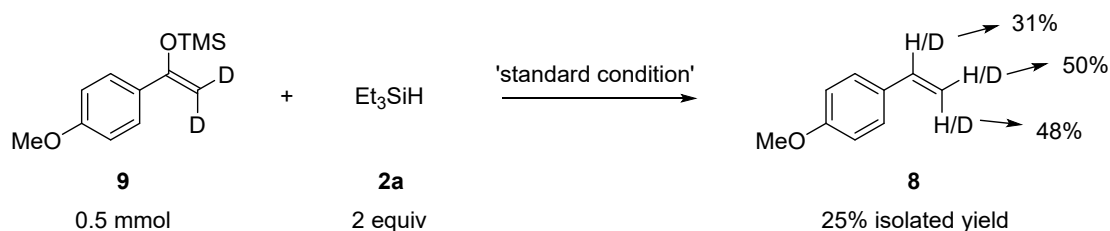

To an oven-dried 10-mL sealed tube equipped with a magnetic stir bar were subsequently added with Ni(cod)<sub>2</sub> (10 mol%), PCy<sub>3</sub> (20 mol%), **2a** (1 mmol) and **9** (0.5 mmol), then 1,4-dioxane (5 mL) was added, the mixture was stirred at 100 °C for 24 h. After the reaction, the reaction was quenched by ethyl acetate (2 mL) and

evaporated. The desired products **8** were purified by flash chromatography on silica gel (petroleum ether/EtOAc = pure PE - 10:1).

### c) Hydrosilylation of styrene

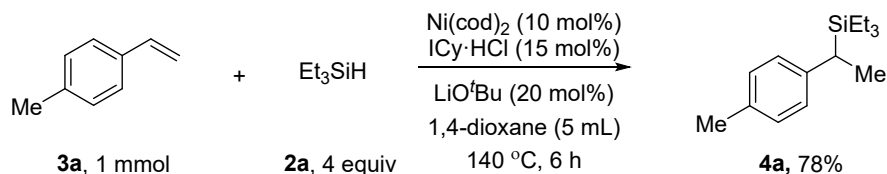

To an oven-dried 10-mL sealed tube equipped with a magnetic stir bar were subsequently added with  $\text{Ni}(\text{cod})_2$  (10 mol%),  $\text{ICy}\cdot\text{HCl}$  (15 mol%),  $\text{LiO}^t\text{Bu}$  (20 mol%), 1,4-dioxane (5 mL) was added and the mixture was stirred at room temperature for 5min. Then **2a** (2 mmol) and **3a** (0.5 mmol) was added, the mixture was stirred at 140 °C for 8 h. After the reaction, the reaction was quenched by ethyl acetate (2 mL) and evaporated. The desired products **4a** were purified by flash chromatography on silica gel (petroleum ether/EtOAc = pure PE - 10:1).

### d) Competition experiment

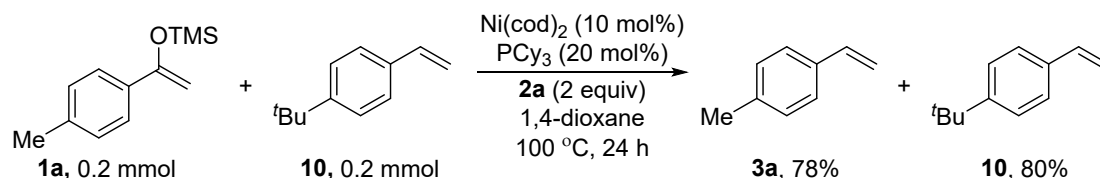

To an oven-dried 10-mL sealed tube equipped with a magnetic stir bar were subsequently added with  $\text{Ni}(\text{cod})_2$  (10 mol%),  $\text{PCy}_3$  (20 mol%),  $\text{LiO}^t\text{Bu}$  (20 mol%), 1,4-dioxane (5 mL) was added and the mixture was stirred at room temperature for 5min. Then **1a** (0.2 mmol), **10** (0.2 mmol), and **2a** (0.4 mmol) was added, the mixture was stirred at 100 °C for 24 h. After the reaction, *n*-dodecane was added as internal standard and the products were determined by GC analysis.

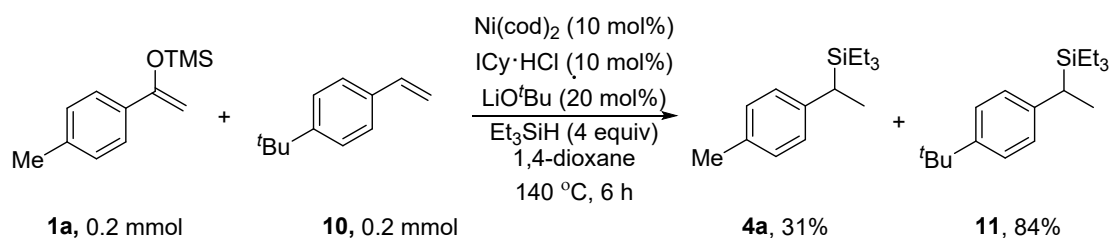



To an oven-dried 10-mL sealed tube equipped with a magnetic stir bar were subsequently added with Ni(cod)<sub>2</sub> (10 mol%), ICy·HCl (15 mol%), LiO<sup>t</sup>Bu (20 mol%), 1,4-dioxane (5 mL) was added and the mixture was stirred at room temperature for 5min. Then **1a** (0.2 mmol), **10** (0.2 mmol), and **2a** (0.8 mmol) was added, the mixture was stirred at 140 °C for 6 h. After the reaction, *n*-dodecane was added as internal standard and the products were determined by GC analysis.

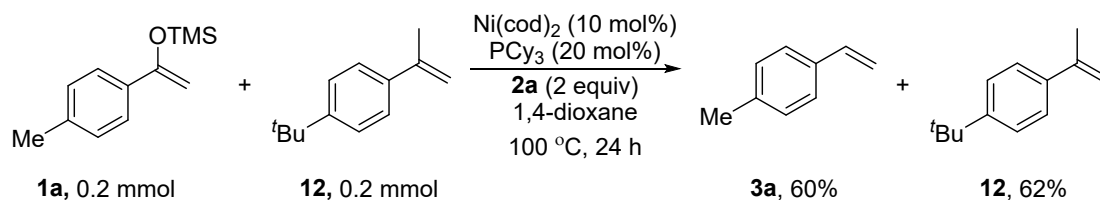

To an oven-dried 10-mL sealed tube equipped with a magnetic stir bar were subsequently added with Ni(cod)<sub>2</sub> (10 mol%), PCy<sub>3</sub> (20 mol%), LiO<sup>t</sup>Bu (20 mol%), 1,4-dioxane (5 mL) was added and the mixture was stirred at room temperature for 5min. Then **1a** (0.2 mmol), **12** (0.2 mmol), and **2a** (0.4 mmol) was added, the mixture was stirred at 100 °C for 24 h. After the reaction, *n*-dodecane was added as internal standard and the products were determined by GC analysis.

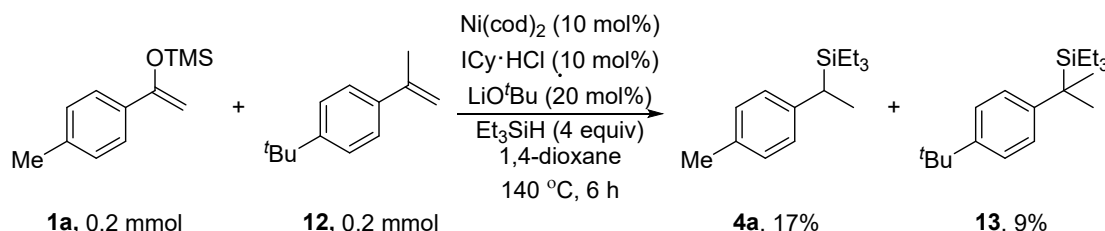

To an oven-dried 10-mL sealed tube equipped with a magnetic stir bar were subsequently added with Ni(cod)<sub>2</sub> (10 mol%), ICy·HCl (15 mol%), LiO<sup>t</sup>Bu (20 mol%), 1,4-dioxane (5 mL) was added and the mixture was stirred at room temperature for 5min. Then **1a** (0.2 mmol), **12** (0.2 mmol), and **2a** (0.8 mmol) was added, the mixture was stirred at 140 °C for 6 h. After the reaction, *n*-dodecane was added as internal standard and the products were determined by GC analysis.

#### e) Determination of the orders of the reaction

##### General procedure for kinetic experiments.

Kinetic experiments were run inside a N<sub>2</sub> filled glovebox. The data (product

yield versus time) was analyzed using the initial rates method. A significant enhancement on the initial rates with the concentration of catalyst and  $\text{HSiEt}_3$  observed, therefore ruling out order 0 of these parameters. For silyl enol ether, it exhibits nearly zero-order dependence on their concentration. These kinetic results indicate that silyl enol ether is not involved in the rate determining step.

#### **Investigate the reaction order of silyl enol ether**

The order in silyl enol ether **1a** was determined by studying the initial rate of reactions with different **1a**. To an oven-dried 15 mL Schleck tube, equipped with a magnetic stir bar, was added silyl enol ether (0.2, 0.3, 0.4, 0.5 mmol),  $\text{Ni}(\text{cod})_2$  (0.02 mmol),  $\text{PCy}_3$  (0.04 mmol),  $\text{Et}_3\text{SiH}$  (47 mg, 0.4 mmol) and *n*-dodecane in 1,4-dioxane (2 mL), and the reaction was heated at 100 °C. Aliquots were taken out with a needle at 1 min, 1.5 min, 2 min, 2.5 min, 3 min, and 3.5 min, immediately filtered through a plug of  $\text{SiO}_2$  washing with ethyl acetate. Product yield from the corresponding reaction was monitored by GC analysis using *n*-dodecane as internal standard in the indicated interval based on the amount of  $\text{Et}_3\text{SiH}$ . Using different amounts of silyl enol ether (0.2, 0.3, 0.4, 0.5 mmol). A log plot of initial rate versus  $\log [\mathbf{1a}]$  gave a straight line ( $R = -0.47241$ ), indicative of 0.03 order dependence on  $[\mathbf{1a}]$ . The results were shown in below.

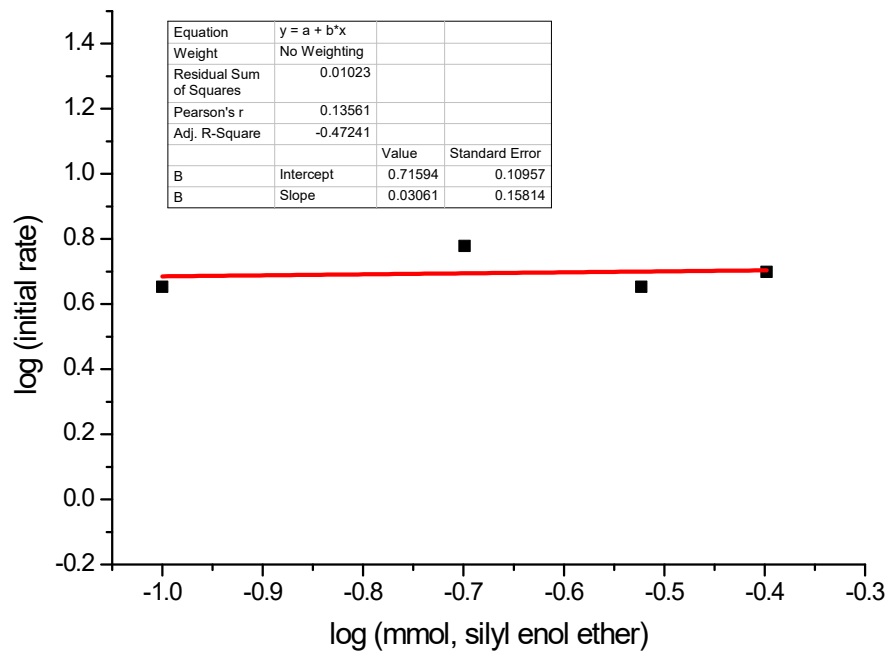

## Investigate the reaction order of Ni(cod)<sub>2</sub>

The order in Ni(cod)<sub>2</sub> was determined by studying the initial rate of reactions with different Ni(cod)<sub>2</sub>. To an oven-dried 15 mL Schleck tube, equipped with a magnetic stir bar, was added silyl enol ether (0.2 mmol), Ni(cod)<sub>2</sub> (0.01, 0.02, 0.03, 0.04 mmol), PCy<sub>3</sub> (0.04 mmol), Et<sub>3</sub>SiH (47 mg, 0.4 mmol) and *n*-dodecane in 1,4-dioxane (2 mL), and the reaction was heated at 100 °C. Aliquots were taken out with a needle at 1 min, 2 min, 3 min, 4 min, 5 min, and 6 min, immediately filtered through a plug of SiO<sub>2</sub> washing with ethyl acetate. Product yield from the corresponding reaction was monitored by GC analysis using *n*-dodecane as internal standard in the indicated interval based on the amount of silyl enol ether. Using different amounts of Ni(cod)<sub>2</sub> (0.01, 0.02, 0.03, 0.04 mmol). A log plot of initial rate versus log [Ni(cod)<sub>2</sub>] gave a straight line (R = 0.90038), indicative of 0.83 order dependence on [Ni(cod)<sub>2</sub>]. The results were shown in below.

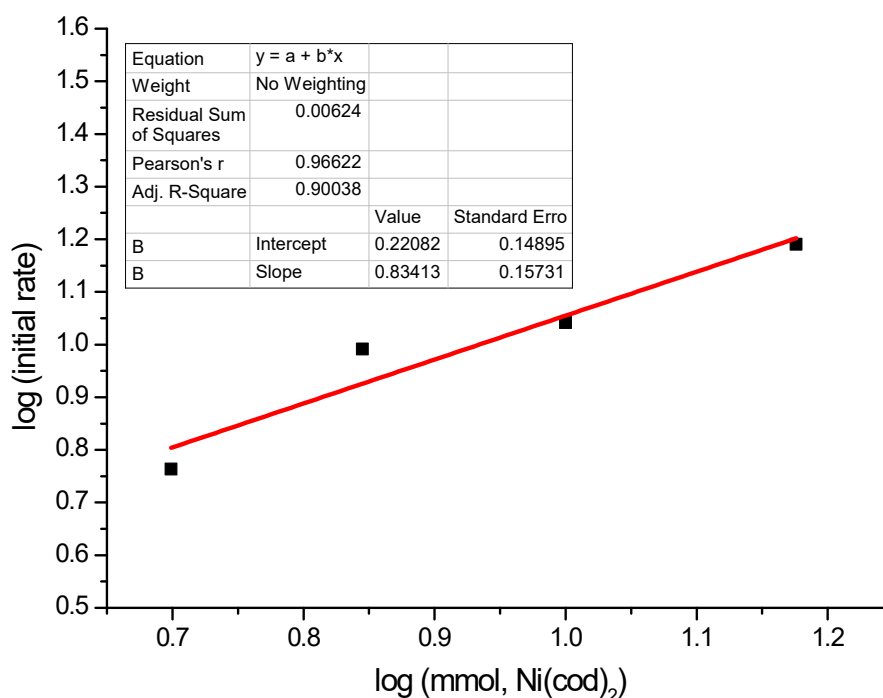

### Investigate the reaction order of Et<sub>3</sub>SiH

The order in Et<sub>3</sub>SiH was determined by studying the initial rate of reactions with different Et<sub>3</sub>SiH. To an oven-dried 15 mL Schleck tube, equipped with a magnetic stir bar, was added silyl enol ether (0.2 mmol), Ni(cod)<sub>2</sub> (0.02 mmol), PCy<sub>3</sub> (0.04 mmol), Et<sub>3</sub>SiH (0.2, 0.4, 0.6, 0.8 mmol) and *n*-dodecane in 1,4-dioxane (2 mL), and the reaction was heated at 100 °C. Aliquots were taken out with a needle at 1 min, 2 min, 3 min, 4 min, 5 min, and 6 min, immediately filtered through a plug of SiO<sub>2</sub> washing with ethyl acetate. Product yield from the corresponding reaction was monitored by GC analysis using *n*-dodecane as internal standard in the indicated interval based on the amount of silyl enol ether. Using different amounts of Et<sub>3</sub>SiH (0.2, 0.4, 0.6, 0.8 mmol). A log plot of initial rate versus log [Et<sub>3</sub>SiH] gave a straight line (R = 0.97487), indicative of 0.57 order dependence on [Et<sub>3</sub>SiH]. The results were shown in below.

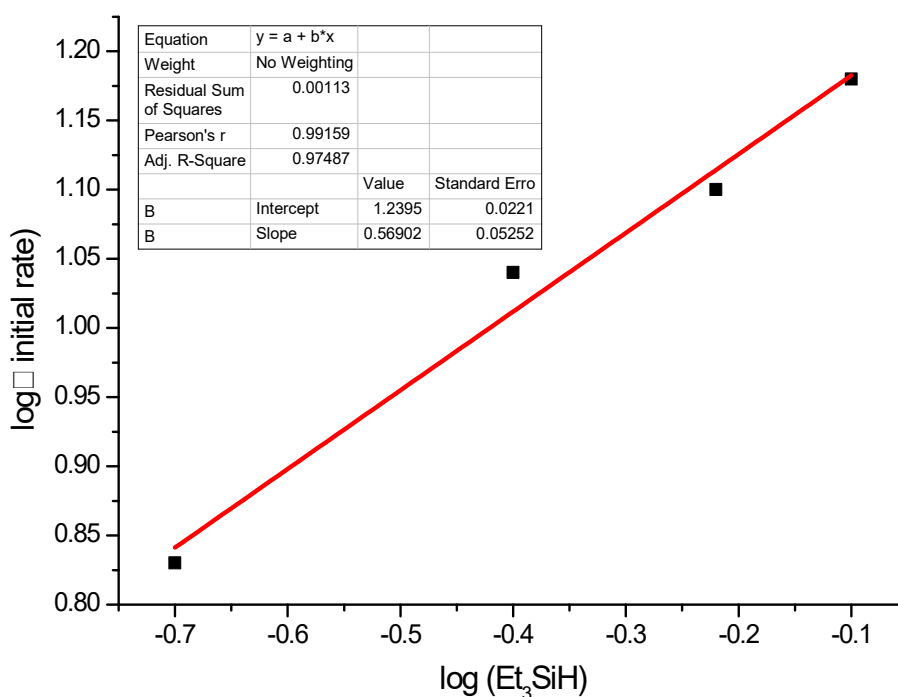

## f) DFT calculation

Density functional theory (DFT) calculations were performed using the Gaussian 09 package<sup>2</sup> to elaborate the detailed reaction mechanism of the Nickel-catalyzed ligand-controlled C–O bond cleavage of silyl enol ether **1a**. Geometry optimizations were carried out at the B3LYP<sup>3</sup> level of theory with Grimme D3 correction<sup>4</sup> in the gas phase. A mixed basis set was used with LANL08<sup>5</sup> for Ni atom and 6-31G(d)<sup>6</sup> for all other atoms. Furthermore, the single-point solvation energies of all stationary points were calculated with B3LYP-D3 functional and a mixed basis set of 6-311++G(d,p)<sup>7</sup> for all nonmetal atoms and the SDD<sup>8</sup> for Ni with continuum model SMD<sup>9</sup> (solvent = 1,4-dioxane). The calculated optimized structures are visualized utilizing CYLview program<sup>10</sup>.

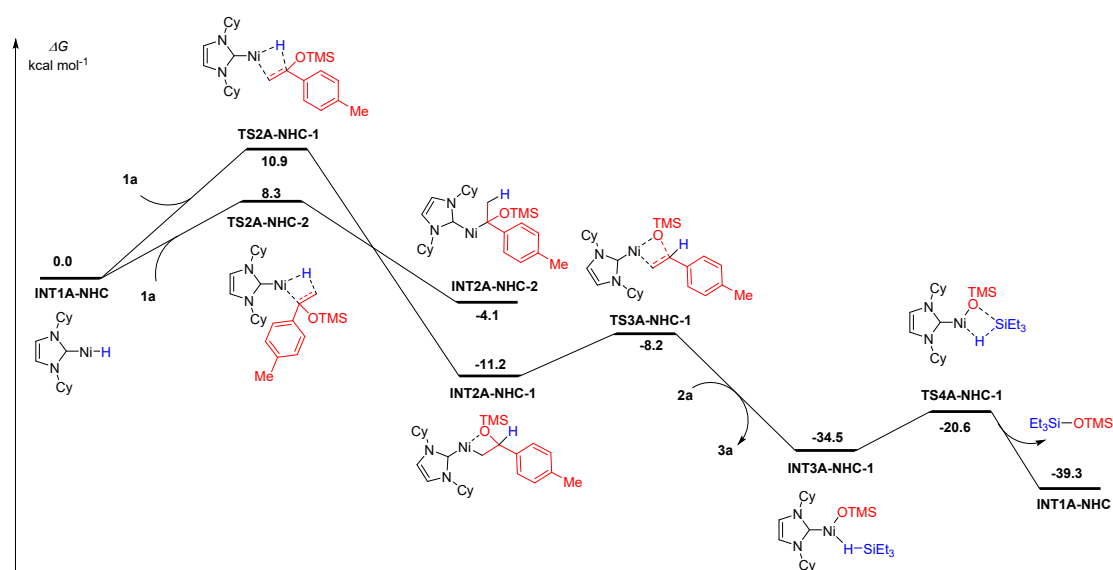

**Fig. S1** The energy profile for the generation of **3a** in the presence of **INT1A-NHC**.

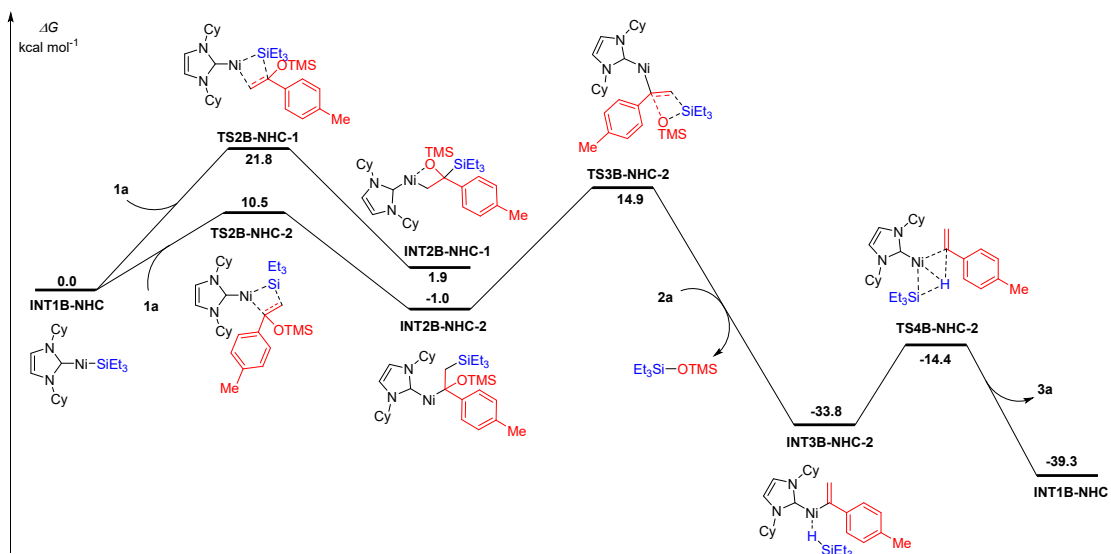

Fig. S2 The energy profile for the generation of 3a in the presence of INT1B-NHC.

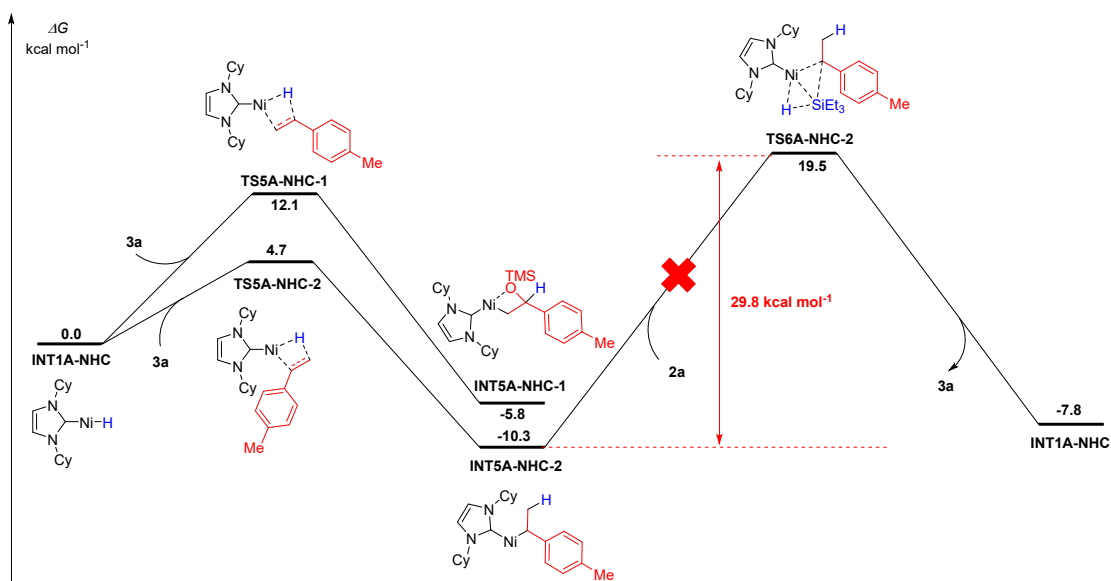

Fig. S3 The reaction between INT1A-NHC and 3a.

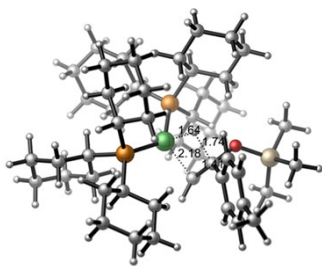

TS2A-1

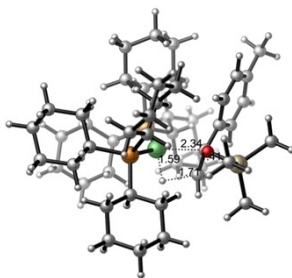

TS2A-2

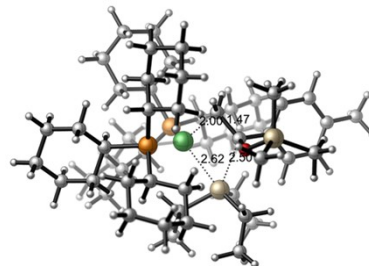

TS2B-1

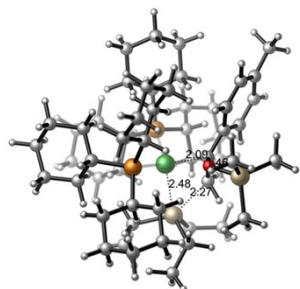

TS2B-2

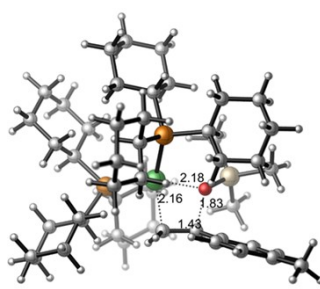

TS3A-1

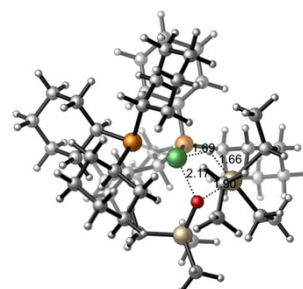

TS4A-1

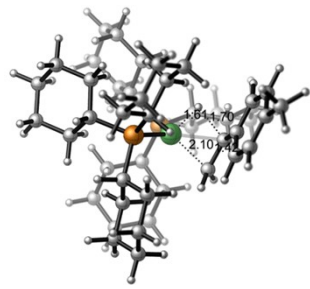

TS5A-1

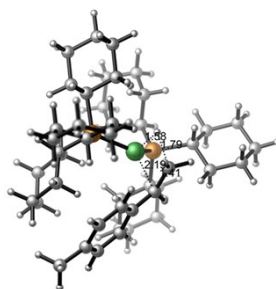

TS5A-2

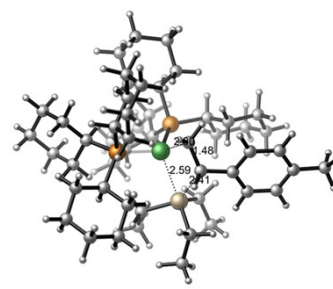

TS5B-1

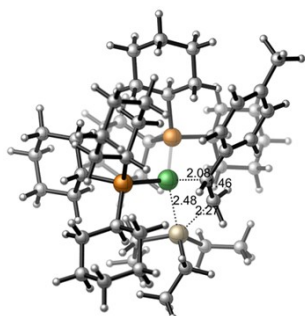

TS5B-2

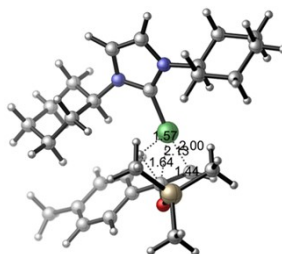

TS2A-NHC-1

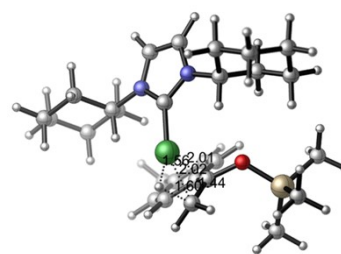

TS2A-NHC-2

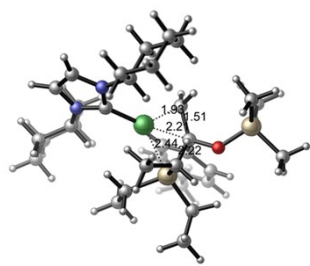

TS2B-NHC-1

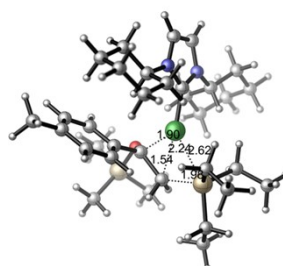

TS2B-NHC-2

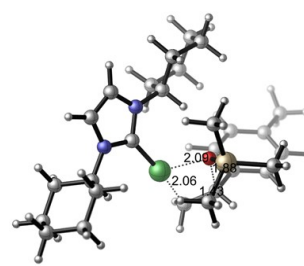

TS3A-NHC-1



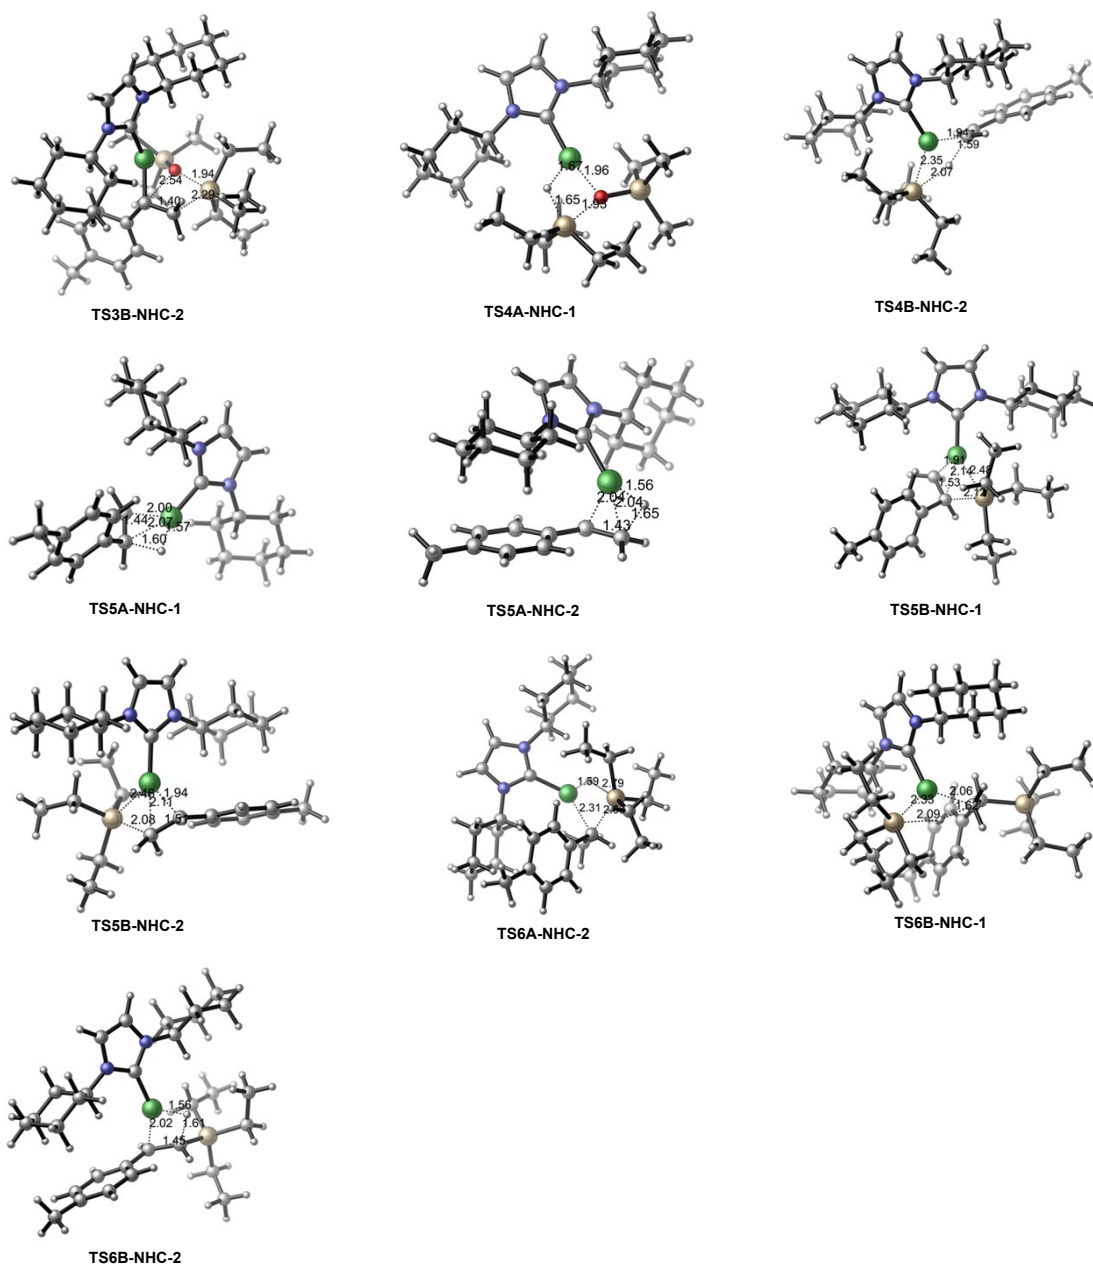

**Fig. S4** Optimized structures of the key transition states. Distances are in Å.

**Table S5.** The calculated energies of stationary points (in Hartree/Particle), and vibrational frequencies of transitions states (in  $\text{cm}^{-1}$ )

| Structure          | ZPE      | $H_{\text{corr}}$ | $G_{\text{corr}}$ | $E_{\text{ele}}$ | $H_{\text{sol}}$ | $G_{\text{sol}}$ |
|--------------------|----------|-------------------|-------------------|------------------|------------------|------------------|
| <b>1a</b>          | 0.267966 | 0.286336          | 0.220569          | -833.108598      | -832.822262      | -832.888029      |
| <b>2a</b>          | 0.207088 | 0.219394          | 0.169787          | -527.908502      | -527.689108      | -527.738715      |
| <b>INT1A</b>       | 0.983634 | 1.026970          | 0.907378          | -2266.515848     | -2265.488878     | -2265.608470     |
| <b>INT1A-dimer</b> | 1.978482 | 2.063904          | 1.860310          | -4533.090796     | -4531.026892     | -4531.230486     |
| <b>TS2A-1</b>      | 1.257089 | 1.317588          | 1.162926          | -3099.623292     | -3098.305704     | -3098.460366     |
| <b>INT2A-1</b>     | 1.261147 | 1.322295          | 1.164553          | -3099.666802     | -3098.344507     | -3098.502249     |
| <b>TS2A-2</b>      | 1.257468 | 1.317669          | 1.165379          | -3099.626844     | -3098.309175     | -3098.461465     |

|                         |          |          |          |              |              |              |
|-------------------------|----------|----------|----------|--------------|--------------|--------------|
| <b>INT2A-2</b>          | 1.261834 | 1.322601 | 1.168512 | -3099.668793 | -3098.346192 | -3098.500281 |
| <b>INT1B</b>            | 1.179554 | 1.234390 | 1.091247 | -2793.248684 | -2792.014294 | -2792.157437 |
| <b>TS2B-1</b>           | 1.453796 | 1.524642 | 1.351957 | -3626.314673 | -3624.790031 | -3624.962716 |
| <b>INT2B-1</b>          | 1.453495 | 1.524934 | 1.349647 | -3626.372078 | -3624.847144 | -3625.022431 |
| <b>TS2B-2</b>           | 1.453919 | 1.524827 | 1.351653 | -3626.339518 | -3624.814691 | -3624.987865 |
| <b>INT2B-2</b>          | 1.453339 | 1.524966 | 1.349212 | -3626.388945 | -3624.863979 | -3625.039733 |
| <b>TS3A-1</b>           | 1.260245 | 1.320833 | 1.166158 | -3099.652095 | -3098.331262 | -3098.485937 |
| <b>INT3A-1</b>          | 1.306448 | 1.370958 | 1.207283 | -3278.544060 | -3277.173102 | -3277.336777 |
| <b>3a</b>               | 0.161346 | 0.170934 | 0.126441 | -349.075034  | -348.904100  | -348.948593  |
| <b>TS4A-1</b>           | 1.308264 | 1.370569 | 1.216850 | -3278.514189 | -3277.143620 | -3277.297339 |
| Et <sub>3</sub> Si-OTMS | 0.315944 | 0.337220 | 0.266791 | -1012.007615 | -1011.670395 | -1011.740824 |
| <b>TS5A-1</b>           | 1.148567 | 1.200599 | 1.063953 | -2615.589944 | -2614.389345 | -2614.525991 |
| <b>INT5A-1</b>          | 1.153561 | 1.205974 | 1.066639 | -2615.626518 | -2614.420544 | -2614.559879 |
| <b>TS5A-2</b>           | 1.149481 | 1.201440 | 1.065296 | -2615.595378 | -2614.393938 | -2614.530082 |
| <b>INT5A-2</b>          | 1.154645 | 1.206901 | 1.069478 | -2615.629931 | -2614.423030 | -2614.560453 |
| <b>TS5B-1</b>           | 1.346885 | 1.409082 | 1.252981 | -3142.284772 | -3140.875690 | -3141.031791 |
| <b>INT5B-1</b>          | 1.344106 | 1.407803 | 1.245301 | -3142.354049 | -3140.946246 | -3141.108748 |
| <b>TS5B-2</b>           | 1.347402 | 1.409568 | 1.253548 | -3142.307875 | -3140.898307 | -3141.054327 |
| <b>INT5B-2</b>          | 1.343388 | 1.407525 | 1.242065 | -3142.357008 | -3140.949483 | -3141.114943 |
| <b>INT1A-NHC</b>        | 0.383936 | 0.402394 | 0.336326 | -867.350189  | -866.947795  | -867.013863  |
| <b>TS2A-NHC-1</b>       | 0.653173 | 0.688988 | 0.585566 | -1700.470017 | -1699.781029 | -1699.884451 |
| <b>INT2A-NHC-1</b>      | 0.658634 | 0.694940 | 0.588451 | -1700.508134 | -1699.813194 | -1699.919683 |
| <b>TS2A-NHC-2</b>       | 0.653022 | 0.689373 | 0.583739 | -1700.472331 | -1699.782958 | -1699.888592 |
| <b>INT2A-NHC-2</b>      | 0.657101 | 0.694087 | 0.587386 | -1700.495880 | -1699.801793 | -1699.908494 |
| <b>TS3A-NHC-1</b>       | 0.656350 | 0.692747 | 0.584753 | -1700.499643 | -1699.806896 | -1699.914890 |
| <b>INT3A-NHC-1</b>      | 0.702097 | 0.742630 | 0.626723 | -1879.373768 | -1878.631138 | -1878.747045 |
| <b>TS4A-NHC-1</b>       | 0.702551 | 0.741360 | 0.631760 | -1879.356672 | -1878.615312 | -1878.724912 |
| <b>INT1B-NHC</b>        | 0.576760 | 0.607318 | 0.512603 | -1394.079089 | -1393.471771 | -1393.566486 |
| <b>TS2B-NHC-1</b>       | 0.846588 | 0.894070 | 0.764528 | -2227.184253 | -2226.290183 | -2226.419725 |
| <b>INT2B-NHC-1</b>      | 0.848573 | 0.895984 | 0.767706 | -2227.219139 | -2226.323155 | -2226.451433 |
| <b>TS2B-NHC-2</b>       | 0.846591 | 0.894403 | 0.762028 | -2227.199857 | -2226.305454 | -2226.437829 |
| <b>INT2B-NHC-2</b>      | 0.847543 | 0.895486 | 0.764928 | -2227.220965 | -2226.325479 | -2226.456037 |
| <b>TS3B-NHC-2</b>       | 0.846383 | 0.894071 | 0.763112 | -2227.193841 | -2226.299770 | -2226.430729 |
| <b>INT3B-NHC-2</b>      | 0.737827 | 0.777815 | 0.663879 | -1743.170118 | -1742.392303 | -1742.506239 |
| <b>TS4B-NHC-2</b>       | 0.735433 | 0.775216 | 0.660662 | -1743.136009 | -1742.360793 | -1742.475347 |
| <b>TS5A-NHC-1</b>       | 0.545964 | 0.573615 | 0.484639 | -1216.427740 | -1215.854125 | -1215.943101 |
| <b>INT5A-NHC-1</b>      | 0.551050 | 0.579309 | 0.485875 | -1216.457529 | -1215.878220 | -1215.971654 |
| <b>TS5A-NHC-2</b>       | 0.546803 | 0.574348 | 0.487433 | -1216.442352 | -1215.868004 | -1215.954919 |
| <b>INT5A-NHC-2</b>      | 0.551076 | 0.579119 | 0.490947 | -1216.469820 | -1215.890701 | -1215.978873 |
| <b>TS6A-NHC-2</b>       | 0.759202 | 0.798905 | 0.685625 | -1744.355724 | -1743.556819 | -1743.670099 |
| <b>TS5B-NHC-1</b>       | 0.739829 | 0.778646 | 0.666783 | -1743.153047 | -1742.374401 | -1742.486264 |
| <b>INT5B-NHC-1</b>      | 0.741173 | 0.780466 | 0.665988 | -1743.186365 | -1742.405899 | -1742.520377 |
| <b>TS5B-NHC-2</b>       | 0.741163 | 0.779492 | 0.670657 | -1743.172911 | -1742.393419 | -1742.502254 |
| <b>INT5B-NHC-2</b>      | 0.740744 | 0.780235 | 0.665660 | -1743.189257 | -1742.409022 | -1742.523597 |
| <b>TS6B-NHC-1</b>       | 0.948576 | 1.000383 | 0.859589 | -2271.084528 | -2270.084145 | -2270.224939 |
| <b>4a</b>               | 0.374975 | 0.396350 | 0.325756 | -877.025543  | -876.629193  | -876.699787  |
| <b>TS6B-NHC-2</b>       | 0.735698 | 0.775005 | 0.662723 | -1743.171879 | -1742.396874 | -1742.509156 |
| <b>5a</b>               | 0.350937 | 0.372286 | 0.297753 | -875.797272  | -875.424986  | -875.499519  |

Notes: ZPE = zero-point vibrational energy in the gas phase;  $H_{\text{corr}}$  = thermal correction to enthalpy in the gas phase;  $G_{\text{corr}}$  = thermal correction to Gibbs free energy in the gas phase;  $E_{\text{ele}}$  = the electronic energies in solvent;  $H_{\text{sol}}$  = ethalpies in solvent;  $G_{\text{sol}}$  = Gibbs free energies in solvent.

**DFT-Computed Energies and Cartesian Coordinate (unit: angstrom)**

|           |           |           |           |           |           |           |           |
|-----------|-----------|-----------|-----------|-----------|-----------|-----------|-----------|
| <b>1a</b> |           |           |           | H         | -2.461178 | 2.796248  | 0.212735  |
| C         | 3.497051  | -0.984772 | -0.164012 | C         | -3.110754 | -0.026127 | 1.803072  |
| C         | 2.170776  | -1.403290 | -0.185785 | H         | -4.176928 | 0.069864  | 2.042153  |
| C         | 1.120312  | -0.480387 | -0.049166 | H         | -2.792913 | -1.039430 | 2.069149  |
| C         | 1.451700  | 0.876619  | 0.080194  | H         | -2.558474 | 0.673164  | 2.441520  |
| C         | 2.782542  | 1.289218  | 0.099615  | C         | -3.848421 | -0.751435 | -1.132968 |
| C         | 3.830653  | 0.368989  | -0.014619 | H         | -4.912359 | -0.511668 | -1.011630 |
| H         | 4.290126  | -1.720525 | -0.279788 | H         | -3.587924 | -0.589370 | -2.185419 |
| H         | 1.949150  | -2.455049 | -0.338901 | H         | -3.722507 | -1.818504 | -0.920404 |
| H         | 0.655493  | 1.607908  | 0.162787  |           |           |           |           |
| H         | 3.010581  | 2.347957  | 0.203488  | <b>2a</b> |           |           |           |
| C         | 5.273369  | 0.811970  | 0.037573  | Si        | 0.001219  | -0.000981 | 0.287604  |
| H         | 5.383546  | 1.860448  | -0.259279 | H         | 0.003435  | -0.000573 | 1.785590  |
| H         | 5.680184  | 0.715631  | 1.053349  | C         | -1.039668 | 1.469420  | -0.311194 |
| H         | 5.904134  | 0.204941  | -0.621561 | C         | -0.498510 | 2.849071  | 0.105815  |
| C         | -0.301577 | -0.906898 | -0.045331 | H         | -2.063750 | 1.343402  | 0.066960  |
| C         | -0.715032 | -2.154075 | 0.239914  | H         | -1.118620 | 1.415658  | -1.406999 |
| H         | -1.759455 | -2.438110 | 0.196644  | H         | -1.147903 | 3.661163  | -0.244170 |
| H         | -0.009359 | -2.921563 | 0.530780  | H         | -0.423910 | 2.936761  | 1.196597  |
| O         | -1.151853 | 0.118022  | -0.358243 | H         | 0.501601  | 3.030421  | -0.305821 |
| Si        | -2.793815 | 0.338816  | -0.015834 | C         | 1.793744  | 0.163041  | -0.316019 |
| C         | -3.083376 | 2.149957  | -0.416802 | C         | 2.719906  | -0.991438 | 0.107661  |
| H         | -2.835823 | 2.362440  | -1.463021 | H         | 2.196863  | 1.116116  | 0.053584  |
| H         | -4.131521 | 2.429421  | -0.255099 | H         | 1.783783  | 0.249591  | -1.412497 |

|              |           |           |           |   |           |           |           |
|--------------|-----------|-----------|-----------|---|-----------|-----------|-----------|
| H            | 3.746713  | -0.837251 | -0.246559 | C | -2.536471 | -2.075232 | -1.682740 |
| H            | 2.761494  | -1.091338 | 1.199129  | C | -4.626777 | -1.218927 | -0.521422 |
| H            | 2.376424  | -1.951432 | -0.295772 | H | -3.460793 | -0.169088 | -1.991432 |
| C            | -0.755635 | -1.636219 | -0.311342 | C | -3.409203 | -2.819204 | -2.704379 |
| C            | -2.221787 | -1.852741 | 0.105145  | H | -2.293620 | -2.754052 | -0.852203 |
| H            | -0.137316 | -2.462366 | 0.066182  | H | -1.583194 | -1.765962 | -2.126492 |
| H            | -0.669304 | -1.677110 | -1.407140 | C | -5.496937 | -1.959170 | -1.552591 |
| H            | -2.604646 | -2.818456 | -0.247720 | H | -4.467507 | -1.879536 | 0.341172  |
| H            | -2.334765 | -1.834276 | 1.195986  | H | -5.157273 | -0.338174 | -0.144825 |
| H            | -2.875466 | -1.073384 | -0.304198 | C | -4.775847 | -3.194835 | -2.111969 |
|              |           |           |           | H | -2.887286 | -3.716256 | -3.061580 |
| <b>INT1A</b> |           |           |           | H | -3.560497 | -2.173049 | -3.582089 |
| C            | -2.522316 | -0.231017 | 1.716417  | H | -6.453103 | -2.247004 | -1.096315 |
| C            | -2.077731 | -1.683427 | 1.999205  | H | -5.736279 | -1.273243 | -2.379003 |
| C            | -1.787056 | 0.739900  | 2.664283  | H | -5.400180 | -3.690385 | -2.866466 |
| H            | -3.604339 | -0.148430 | 1.886500  | H | -4.627621 | -3.921106 | -1.298504 |
| C            | -2.250166 | -2.067399 | 3.476205  | C | -2.664940 | 1.967429  | -0.292290 |
| H            | -1.020306 | -1.782056 | 1.710784  | C | -2.238754 | 2.478785  | -1.685360 |
| H            | -2.632808 | -2.385447 | 1.367891  | C | -4.146569 | 2.285607  | -0.023515 |
| C            | -1.938641 | 0.347994  | 4.142510  | H | -2.059810 | 2.516315  | 0.443924  |
| H            | -0.720339 | 0.742771  | 2.393881  | C | -2.511346 | 3.984105  | -1.824940 |
| H            | -2.148926 | 1.765087  | 2.520754  | H | -2.799561 | 1.939504  | -2.462619 |
| C            | -1.495149 | -1.099165 | 4.395631  | H | -1.182326 | 2.245813  | -1.857886 |
| H            | -1.903032 | -3.096621 | 3.634460  | C | -4.415667 | 3.794754  | -0.160249 |
| H            | -3.319969 | -2.052449 | 3.732635  | H | -4.770601 | 1.747444  | -0.750119 |
| H            | -1.360049 | 1.040855  | 4.767648  | H | -4.446595 | 1.938356  | 0.973162  |
| H            | -2.991564 | 0.459756  | 4.441040  | C | -3.983468 | 4.317670  | -1.538700 |
| H            | -1.649112 | -1.367512 | 5.448482  | H | -2.230950 | 4.323848  | -2.830049 |
| H            | -0.416580 | -1.187948 | 4.201716  | H | -1.871168 | 4.531988  | -1.117065 |
| C            | -3.266043 | -0.829475 | -1.133091 | H | -5.479282 | 4.003885  | 0.012851  |

|   |           |           |           |    |          |           |           |
|---|-----------|-----------|-----------|----|----------|-----------|-----------|
| H | -3.857482 | 4.330605  | 0.621956  | H  | 2.646826 | -2.089359 | 2.080698  |
| H | -4.152455 | 5.400065  | -1.604829 | C  | 2.323565 | 0.406072  | 4.486411  |
| H | -4.613161 | 3.852385  | -2.311850 | H  | 2.643940 | 2.507435  | 4.018200  |
| P | -2.107080 | 0.192547  | -0.063703 | H  | 4.038864 | 1.472775  | 3.717248  |
| C | 2.905309  | -1.825002 | -0.728924 | H  | 2.233669 | -1.768853 | 4.512616  |
| C | 1.790024  | -2.886402 | -0.564647 | H  | 3.795428 | -1.108315 | 4.031074  |
| C | 3.423791  | -1.851646 | -2.181572 | H  | 2.638725 | 0.497600  | 5.533569  |
| H | 3.742646  | -2.077641 | -0.060086 | H  | 1.228574 | 0.509915  | 4.475308  |
| C | 2.266479  | -4.290869 | -0.963048 | C  | 3.143073 | 1.135779  | -1.200026 |
| H | 0.945319  | -2.584656 | -1.200174 | C  | 2.365304 | 2.468557  | -1.261357 |
| H | 1.409714  | -2.895995 | 0.462604  | C  | 4.624494 | 1.359472  | -0.846375 |
| C | 3.898950  | -3.257496 | -2.586534 | H  | 3.091635 | 0.719434  | -2.213701 |
| H | 2.613919  | -1.530651 | -2.851219 | C  | 3.034383 | 3.443411  | -2.242717 |
| H | 4.250892  | -1.144981 | -2.313075 | H  | 2.320361 | 2.932970  | -0.267960 |
| C | 2.795763  | -4.307720 | -2.403093 | H  | 1.333060 | 2.258711  | -1.565855 |
| H | 1.443949  | -5.008721 | -0.847593 | C  | 5.281302 | 2.340870  | -1.832710 |
| H | 3.065279  | -4.613760 | -0.277829 | H  | 4.706778 | 1.771499  | 0.168589  |
| H | 4.245501  | -3.242917 | -3.627994 | H  | 5.169423 | 0.406434  | -0.840712 |
| H | 4.767387  | -3.534978 | -1.969843 | C  | 4.512907 | 3.670368  | -1.891518 |
| H | 3.169464  | -5.305759 | -2.665800 | H  | 2.492878 | 4.398200  | -2.251770 |
| H | 1.968052  | -4.085590 | -3.092463 | H  | 2.963528 | 3.030934  | -3.260020 |
| C | 2.894867  | 0.016014  | 1.567614  | H  | 6.327906 | 2.514603  | -1.550492 |
| C | 2.537438  | 1.394812  | 2.160182  | H  | 5.295108 | 1.887003  | -2.834666 |
| C | 2.317538  | -1.111661 | 2.449356  | H  | 4.980456 | 4.347343  | -2.617952 |
| H | 3.989834  | -0.086773 | 1.539605  | H  | 4.578598 | 4.166083  | -0.911002 |
| C | 2.942658  | 1.522396  | 3.636833  | P  | 2.223937 | -0.146132 | -0.187354 |
| H | 1.452324  | 1.547352  | 2.063794  | Ni | 0.051905 | -0.018453 | -0.560720 |
| H | 3.014286  | 2.193301  | 1.583153  | H  | 0.123403 | -0.029326 | -2.163014 |
| C | 2.708975  | -0.969847 | 3.928460  |    |          |           |           |
| H | 1.221390  | -1.096219 | 2.361185  |    |          |           |           |

**INT1A-dimer**

|   |           |           |           |   |           |           |           |
|---|-----------|-----------|-----------|---|-----------|-----------|-----------|
| C | 3.934770  | -0.352587 | -2.647977 | H | 1.749135  | -4.066611 | -5.511165 |
| C | 3.256813  | 0.778943  | -3.442918 | H | 0.985053  | -4.507549 | -3.984193 |
| C | 5.219320  | 0.161865  | -1.971258 | H | -0.719505 | -3.551673 | -5.525058 |
| H | 4.234108  | -1.131287 | -3.361876 | H | 0.252310  | -2.093231 | -5.728314 |
| C | 4.212634  | 1.460152  | -4.433869 | C | 3.776245  | -2.398811 | -0.565960 |
| H | 2.859592  | 1.523048  | -2.742023 | C | 2.979468  | -3.245837 | 0.445352  |
| H | 2.396276  | 0.383755  | -3.989385 | C | 4.677705  | -3.317719 | -1.414283 |
| C | 6.173249  | 0.818676  | -2.982393 | H | 4.436992  | -1.751901 | 0.029242  |
| H | 4.953755  | 0.901485  | -1.211427 | C | 3.933324  | -4.057094 | 1.342252  |
| H | 5.741042  | -0.648791 | -1.450469 | H | 2.314729  | -3.936283 | -0.094256 |
| C | 5.482692  | 1.963145  | -3.736096 | H | 2.324379  | -2.597525 | 1.038097  |
| H | 3.694127  | 2.286546  | -4.937402 | C | 5.649257  | -4.105231 | -0.519266 |
| H | 4.494257  | 0.740394  | -5.217075 | H | 4.051526  | -4.034511 | -1.960966 |
| H | 7.068217  | 1.185251  | -2.462679 | H | 5.237964  | -2.750570 | -2.164992 |
| H | 6.515052  | 0.062237  | -3.704631 | C | 4.884550  | -4.936396 | 0.519149  |
| H | 6.168804  | 2.415088  | -4.463746 | H | 3.364675  | -4.678418 | 2.043123  |
| H | 5.213514  | 2.753441  | -3.020093 | H | 4.524227  | -3.362641 | 1.954881  |
| C | 1.586315  | -2.142684 | -2.595602 | H | 6.289603  | -4.751683 | -1.133537 |
| C | 0.321502  | -1.363112 | -3.007729 | H | 6.316650  | -3.399298 | -0.001895 |
| C | 2.240922  | -2.748116 | -3.856321 | H | 5.583977  | -5.464667 | 1.179851  |
| H | 1.254018  | -2.963953 | -1.943696 | H | 4.298627  | -5.708084 | -0.002279 |
| C | -0.662332 | -2.256300 | -3.774879 | P | 2.691637  | -1.120872 | -1.440804 |
| H | 0.606891  | -0.518557 | -3.647801 | C | 2.845882  | 3.098603  | 1.182930  |
| H | -0.155857 | -0.937475 | -2.116276 | C | 3.208868  | 3.074469  | -0.314837 |
| C | 1.258550  | -3.652284 | -4.620434 | C | 1.765620  | 4.171317  | 1.422818  |
| H | 2.552226  | -1.936143 | -4.528280 | H | 3.735535  | 3.389446  | 1.762257  |
| H | 3.145152  | -3.310673 | -3.611032 | C | 3.624093  | 4.449226  | -0.856836 |
| C | -0.012149 | -2.886511 | -5.012578 | H | 2.337315  | 2.695389  | -0.861648 |
| H | -1.552862 | -1.678800 | -4.057752 | H | 4.007699  | 2.353140  | -0.496961 |
| H | -1.008852 | -3.055573 | -3.106729 | C | 2.201060  | 5.552027  | 0.904897  |

|   |          |           |           |    |           |           |          |
|---|----------|-----------|-----------|----|-----------|-----------|----------|
| H | 0.849637 | 3.876219  | 0.899818  | C  | -0.753828 | 0.736565  | 4.508390 |
| H | 1.513441 | 4.252045  | 2.484873  | H  | 0.924906  | -0.430920 | 3.818033 |
| C | 2.548117 | 5.508561  | -0.588168 | H  | -0.149095 | 0.063994  | 2.517967 |
| H | 3.829858 | 4.376525  | -1.933228 | C  | 0.731502  | 2.552256  | 5.462053 |
| H | 4.565119 | 4.759441  | -0.377642 | H  | 2.493891  | 1.462144  | 4.877260 |
| H | 1.401945 | 6.281841  | 1.092630  | H  | 2.425423  | 3.087073  | 4.206713 |
| H | 3.079266 | 5.892611  | 1.473759  | C  | -0.137097 | 1.328263  | 5.783639 |
| H | 2.880948 | 6.494718  | -0.936490 | H  | -1.330339 | -0.163365 | 4.758050 |
| H | 1.643755 | 5.257923  | -1.160844 | H  | -1.468505 | 1.456972  | 4.085703 |
| C | 3.971097 | 0.801153  | 2.581967  | H  | 1.194328  | 2.945522  | 6.376722 |
| C | 3.812557 | -0.611898 | 3.176374  | H  | 0.094524  | 3.354837  | 5.061163 |
| C | 5.194220 | 0.843862  | 1.647822  | H  | -0.923493 | 1.594248  | 6.501922 |
| H | 4.154551 | 1.511698  | 3.400190  | H  | 0.488350  | 0.563624  | 6.268603 |
| C | 5.097300 | -1.114280 | 3.855494  | P  | 2.378214  | 1.322600  | 1.703714 |
| H | 3.528239 | -1.296640 | 2.368289  | Ni | 1.318689  | 0.020602  | 0.089027 |
| H | 2.990850 | -0.634767 | 3.899487  | H  | -0.012722 | 1.085572  | 0.102158 |
| C | 6.475823 | 0.372429  | 2.352462  | H  | 0.253510  | -1.320336 | 0.160426 |
| H | 5.007292 | 0.192417  | 0.788064  | C  | -1.742621 | -3.223344 | 1.776968 |
| H | 5.346652 | 1.854074  | 1.251364  | C  | -1.030057 | -4.177189 | 0.797861 |
| C | 6.306920 | -1.044881 | 2.913686  | C  | -0.740679 | -2.765447 | 2.853152 |
| H | 4.948196 | -2.141589 | 4.213169  | H  | -2.542010 | -3.793010 | 2.272757 |
| H | 5.300445 | -0.498078 | 4.744121  | C  | -0.454266 | -5.391291 | 1.546473 |
| H | 7.319688 | 0.409840  | 1.650943  | H  | -0.233030 | -3.622847 | 0.286151 |
| H | 6.716242 | 1.063826  | 3.173827  | H  | -1.718510 | -4.535402 | 0.027354 |
| H | 7.217784 | -1.366909 | 3.434349  | C  | -0.178032 | -3.966205 | 3.627771 |
| H | 6.157699 | -1.743548 | 2.077177  | H  | 0.067833  | -2.218669 | 2.353976 |
| C | 1.191989 | 1.625298  | 3.144608  | H  | -1.207503 | -2.068539 | 3.556065 |
| C | 0.312136 | 0.401951  | 3.452047  | C  | 0.489251  | -4.969661 | 2.679706 |
| C | 1.816107 | 2.201771  | 4.429731  | H  | 0.072144  | -6.048480 | 0.841410 |
| H | 0.510849 | 2.379641  | 2.737622  | H  | -1.285347 | -5.980423 | 1.963924 |

|   |           |           |           |   |           |           |           |
|---|-----------|-----------|-----------|---|-----------|-----------|-----------|
| H | 0.541855  | -3.620499 | 4.381856  | H | -3.458055 | -2.607857 | 3.848413  |
| H | -0.995016 | -4.461124 | 4.175277  | C | -5.620599 | 0.108428  | 4.167449  |
| H | 0.844481  | -5.849582 | 3.232177  | H | -5.713977 | 1.705499  | 2.687070  |
| H | 1.369354  | -4.491824 | 2.239469  | H | -4.143985 | 1.530977  | 3.471488  |
| C | -3.897696 | -2.543335 | -0.129158 | H | -5.131266 | -1.617800 | 5.397575  |
| C | -3.323981 | -2.808831 | -1.537713 | H | -3.785249 | -0.511341 | 5.131612  |
| C | -4.622822 | -3.794527 | 0.407033  | H | -5.930255 | 0.738411  | 5.011076  |
| H | -4.650923 | -1.748227 | -0.230678 | H | -6.532915 | -0.367808 | 3.777721  |
| C | -4.393736 | -3.312439 | -2.515644 | P | -2.564709 | -1.751187 | 0.944815  |
| H | -2.533155 | -3.564161 | -1.472715 | C | -4.237819 | 1.625765  | -2.015679 |
| H | -2.839665 | -1.902128 | -1.911072 | C | -4.526793 | 0.256062  | -2.659242 |
| C | -5.700389 | -4.277431 | -0.579700 | C | -5.460330 | 2.042881  | -1.170581 |
| H | -3.900703 | -4.606632 | 0.561111  | H | -4.150174 | 2.372659  | -2.818871 |
| H | -5.077423 | -3.592591 | 1.382100  | C | -5.790383 | 0.281722  | -3.530305 |
| C | -5.106717 | -4.557178 | -1.967812 | H | -4.665940 | -0.468593 | -1.851303 |
| H | -3.934488 | -3.526364 | -3.489728 | H | -3.671657 | -0.102067 | -3.241906 |
| H | -5.138986 | -2.523637 | -2.686225 | C | -6.744916 | 2.065252  | -2.020211 |
| H | -6.192221 | -5.175746 | -0.184355 | H | -5.596118 | 1.340719  | -0.337842 |
| H | -6.479833 | -3.505359 | -0.669672 | H | -5.318379 | 3.035241  | -0.730571 |
| H | -5.891744 | -4.887249 | -2.660179 | C | -7.007886 | 0.717611  | -2.704843 |
| H | -4.384942 | -5.384355 | -1.890137 | H | -5.961675 | -0.706527 | -3.976175 |
| C | -3.485908 | -0.965547 | 2.394930  | H | -5.642885 | 0.982904  | -4.365383 |
| C | -4.487950 | 0.091412  | 1.901244  | H | -7.598327 | 2.348618  | -1.390284 |
| C | -4.149438 | -1.847803 | 3.470357  | H | -6.649045 | 2.846610  | -2.788825 |
| H | -2.673594 | -0.412670 | 2.884635  | H | -7.904720 | 0.776320  | -3.334681 |
| C | -4.992070 | 0.966041  | 3.058629  | H | -7.209443 | -0.045147 | -1.937353 |
| H | -5.348102 | -0.404346 | 1.427296  | C | -1.556100 | 2.441998  | -2.546434 |
| H | -4.017053 | 0.709177  | 1.134880  | C | -0.076468 | 2.690785  | -2.206804 |
| C | -4.649965 | -0.983129 | 4.642229  | C | -1.658550 | 1.708733  | -3.901456 |
| H | -5.002920 | -2.383593 | 3.035610  | H | -2.044382 | 3.417480  | -2.683062 |



|   |           |          |           |               |           |           |           |
|---|-----------|----------|-----------|---------------|-----------|-----------|-----------|
| C | 0.623215  | 3.495484 | -3.313429 | P             | -2.518148 | 1.581436  | -1.152006 |
| H | 0.420478  | 1.727283 | -2.048670 | Ni            | -1.137797 | -0.209005 | -0.031156 |
| H | 0.012196  | 3.215641 | -1.250606 |               |           |           |           |
| C | -0.966632 | 2.511493 | -5.017013 | <b>TS2A-1</b> |           |           |           |
| H | -1.197677 | 0.717856 | -3.816973 | C             | 3.436653  | 4.103798  | -1.098824 |
| H | -2.701274 | 1.550616 | -4.190515 | C             | 2.257065  | 3.421803  | -1.402114 |
| C | 0.498401  | 2.810810 | -4.680712 | C             | 1.476350  | 2.848889  | -0.390793 |
| H | 1.680681  | 3.638614 | -3.057752 | C             | 1.892537  | 3.013560  | 0.935847  |
| H | 0.177372  | 4.500623 | -3.369639 | C             | 3.069170  | 3.693266  | 1.237527  |
| H | -1.037290 | 1.963233 | -5.965751 | C             | 3.871152  | 4.241229  | 0.224566  |
| H | -1.508552 | 3.458607 | -5.159807 | H             | 4.030182  | 4.531080  | -1.904523 |
| H | 0.954137  | 3.429897 | -5.464627 | H             | 1.938665  | 3.324863  | -2.435836 |
| H | 1.056230  | 1.867122 | -4.660619 | H             | 1.290306  | 2.572748  | 1.724451  |
| C | -2.762363 | 2.956360 | 0.141989  | H             | 3.378180  | 3.795320  | 2.275904  |
| C | -1.822616 | 2.827134 | 1.350246  | C             | 5.178545  | 4.924384  | 0.549668  |
| C | -2.765236 | 4.396283 | -0.406411 | H             | 5.438469  | 5.675395  | -0.204347 |
| H | -3.769800 | 2.758227 | 0.527321  | H             | 5.141723  | 5.421158  | 1.525515  |
| C | -2.150174 | 3.862406 | 2.435714  | H             | 6.003222  | 4.199396  | 0.584582  |
| H | -0.790118 | 2.939428 | 1.018002  | C             | 0.178101  | 2.169504  | -0.738410 |
| H | -1.874946 | 1.809550 | 1.752341  | O             | -0.950100 | 2.892381  | -0.326172 |
| C | -3.106407 | 5.416536 | 0.691597  | Si            | -1.356797 | 4.457865  | -0.805633 |
| H | -1.772833 | 4.637857 | -0.809581 | C             | -0.210271 | 5.744801  | -0.041391 |
| H | -3.474427 | 4.491503 | -1.238853 | H             | 0.804738  | 5.684503  | -0.445993 |
| C | -2.141202 | 5.292237 | 1.878350  | H             | -0.595290 | 6.756094  | -0.227151 |
| H | -1.434168 | 3.772205 | 3.262485  | H             | -0.141490 | 5.604228  | 1.043537  |
| H | -3.143646 | 3.647669 | 2.857967  | C             | -3.098756 | 4.697111  | -0.134277 |
| H | -3.081498 | 6.433359 | 0.278337  | H             | -3.475893 | 5.698765  | -0.374837 |
| H | -4.135173 | 5.242953 | 1.042048  | H             | -3.794822 | 3.964423  | -0.556756 |
| H | -2.401516 | 6.014046 | 2.663056  | H             | -3.115457 | 4.583545  | 0.955367  |
| H | -1.123254 | 5.542134 | 1.542746  | C             | -1.337902 | 4.584475  | -2.686776 |

|   |           |           |           |   |           |           |           |
|---|-----------|-----------|-----------|---|-----------|-----------|-----------|
| H | -2.006282 | 3.840093  | -3.135272 | C | 6.198011  | 0.246709  | -1.084466 |
| H | -1.665260 | 5.578427  | -3.017259 | H | 5.058124  | 1.883213  | -1.959443 |
| H | -0.332991 | 4.409131  | -3.086256 | H | 4.957074  | 0.361661  | -2.849634 |
| C | 2.169869  | -1.903332 | 1.640072  | H | 6.911200  | -1.648217 | -0.279798 |
| C | 2.392400  | -0.597639 | 2.432781  | H | 6.061387  | -1.784027 | -1.818472 |
| C | 1.014921  | -2.716723 | 2.253753  | H | 7.123977  | 0.463231  | -1.632735 |
| H | 3.082698  | -2.509904 | 1.695673  | H | 6.278413  | 0.755962  | -0.112109 |
| C | 2.626156  | -0.870181 | 3.925516  | C | 1.482797  | -3.150693 | -0.951456 |
| H | 1.508923  | 0.039578  | 2.298899  | C | 1.026848  | -2.948767 | -2.411145 |
| H | 3.235454  | -0.033716 | 2.015733  | C | 2.579600  | -4.225478 | -0.859342 |
| C | 1.220719  | -2.966480 | 3.756599  | H | 0.613039  | -3.525256 | -0.397014 |
| H | 0.082624  | -2.166192 | 2.087375  | C | 0.574705  | -4.272882 | -3.046296 |
| H | 0.908779  | -3.681128 | 1.742154  | H | 1.854878  | -2.531645 | -3.003223 |
| C | 1.459169  | -1.662744 | 4.530682  | H | 0.217917  | -2.207509 | -2.439640 |
| H | 2.762684  | 0.078431  | 4.461020  | C | 2.099978  | -5.550321 | -1.477386 |
| H | 3.558312  | -1.441583 | 4.052355  | H | 3.475015  | -3.890392 | -1.399426 |
| H | 0.351516  | -3.499341 | 4.164512  | H | 2.877494  | -4.382637 | 0.184910  |
| H | 2.088092  | -3.629656 | 3.894132  | C | 1.660812  | -5.353462 | -2.936122 |
| H | 1.648772  | -1.879534 | 5.589869  | H | 0.298344  | -4.111698 | -4.096248 |
| H | 0.550839  | -1.046899 | 4.490489  | H | -0.331130 | -4.622681 | -2.532295 |
| C | 3.519991  | -1.053406 | -0.872268 | H | 2.894483  | -6.305127 | -1.414672 |
| C | 3.670070  | 0.456936  | -1.112958 | H | 1.251580  | -5.934965 | -0.891459 |
| C | 4.747519  | -1.593095 | -0.107001 | H | 1.301252  | -6.300528 | -3.358355 |
| H | 3.511681  | -1.536786 | -1.861153 | H | 2.533282  | -5.051969 | -3.535014 |
| C | 4.980112  | 0.796134  | -1.838179 | P | 1.812017  | -1.479548 | -0.154219 |
| H | 3.634771  | 0.994323  | -0.156836 | C | -2.756323 | 0.176952  | 1.874939  |
| H | 2.819194  | 0.819276  | -1.689988 | C | -1.788251 | -0.286553 | 2.983966  |
| C | 6.054654  | -1.263548 | -0.848895 | C | -2.809787 | 1.718552  | 1.891910  |
| H | 4.788705  | -1.132676 | 0.888688  | H | -3.762654 | -0.212956 | 2.091541  |
| H | 4.674114  | -2.673614 | 0.050359  | C | -2.202888 | 0.241423  | 4.366265  |

|   |           |           |           |                |           |           |           |
|---|-----------|-----------|-----------|----------------|-----------|-----------|-----------|
| H | -0.789741 | 0.087559  | 2.726795  | C              | -3.231516 | -0.076030 | -2.447051 |
| H | -1.712732 | -1.375266 | 3.022327  | C              | -4.866665 | 0.520418  | -0.638487 |
| C | -3.230672 | 2.260169  | 3.266812  | H              | -2.942050 | 1.444732  | -0.967600 |
| H | -1.820747 | 2.104136  | 1.626010  | C              | -3.930099 | 0.880320  | -3.425646 |
| H | -3.495813 | 2.101790  | 1.133579  | H              | -3.703243 | -1.064687 | -2.533235 |
| C | -2.289970 | 1.772333  | 4.375233  | H              | -2.175460 | -0.202231 | -2.707253 |
| H | -1.490945 | -0.107341 | 5.125943  | C              | -5.603969 | 1.462153  | -1.609088 |
| H | -3.182295 | -0.181023 | 4.637831  | H              | -5.320751 | -0.478607 | -0.702419 |
| H | -3.251082 | 3.358100  | 3.237443  | H              | -5.017700 | 0.864175  | 0.389674  |
| H | -4.257382 | 1.933547  | 3.492851  | C              | -5.417221 | 1.035721  | -3.072650 |
| H | -2.622378 | 2.136295  | 5.356104  | H              | -3.818661 | 0.517661  | -4.455741 |
| H | -1.286323 | 2.188835  | 4.203150  | H              | -3.436848 | 1.862905  | -3.381534 |
| C | -3.013828 | -2.233775 | 0.124744  | H              | -6.671637 | 1.500622  | -1.356488 |
| C | -2.328803 | -3.077837 | -0.969181 | H              | -5.214829 | 2.482338  | -1.478386 |
| C | -3.009941 | -3.028532 | 1.446247  | H              | -5.899750 | 1.757373  | -3.744202 |
| H | -4.065537 | -2.090077 | -0.160567 | H              | -5.922165 | 0.070982  | -3.231520 |
| C | -3.014510 | -4.440231 | -1.151471 | P              | -2.235046 | -0.500230 | 0.187416  |
| H | -1.286260 | -3.232678 | -0.672010 | Ni             | -0.039666 | -0.135935 | -0.336074 |
| H | -2.293041 | -2.543996 | -1.922750 | H              | 0.168451  | 1.143709  | 0.661892  |
| C | -3.690343 | -4.398480 | 1.280362  | C              | 0.040654  | 1.382234  | -1.900962 |
| H | -1.973234 | -3.185747 | 1.773607  | H              | -0.911479 | 1.418550  | -2.416143 |
| H | -3.516507 | -2.470177 | 2.240327  | H              | 0.911176  | 1.174143  | -2.513705 |
| C | -3.035716 | -5.225866 | 0.166130  |                |           |           |           |
| H | -2.504196 | -5.016952 | -1.933560 | <b>INT2A-1</b> |           |           |           |
| H | -4.046213 | -4.283867 | -1.500547 | C              | -2.787220 | 1.018885  | 2.575439  |
| H | -3.660676 | -4.944227 | 2.232397  | C              | -2.453441 | 0.643081  | 1.272098  |
| H | -4.752629 | -4.244456 | 1.038647  | C              | -3.298831 | -0.160087 | 0.502547  |
| H | -3.558751 | -6.182317 | 0.039478  | C              | -4.510445 | -0.563346 | 1.087651  |
| H | -2.001289 | -5.466205 | 0.455644  | C              | -4.845194 | -0.193634 | 2.388209  |
| C | -3.368476 | 0.433496  | -0.997147 | C              | -3.984770 | 0.600024  | 3.162985  |

|    |           |           |           |   |           |           |           |
|----|-----------|-----------|-----------|---|-----------|-----------|-----------|
| H  | -2.098405 | 1.641305  | 3.143985  | C | 3.461855  | 1.036854  | 3.566749  |
| H  | -1.505886 | 0.966182  | 0.852134  | H | 2.572842  | -0.002450 | 1.884769  |
| H  | -5.191523 | -1.174446 | 0.502970  | H | 3.956416  | 1.000082  | 1.461595  |
| H  | -5.788540 | -0.529349 | 2.814999  | C | 2.239110  | 1.042816  | 4.494560  |
| C  | -4.325649 | 0.952541  | 4.592031  | H | 0.381409  | 2.145420  | 4.757197  |
| H  | -5.396376 | 1.152745  | 4.713650  | H | 1.760621  | 3.145273  | 4.301567  |
| H  | -4.071282 | 0.128922  | 5.273335  | H | 4.123524  | 0.195053  | 3.809517  |
| H  | -3.775716 | 1.837691  | 4.930271  | H | 4.045871  | 1.954063  | 3.733298  |
| C  | -2.932468 | -0.688147 | -0.889018 | H | 2.555967  | 1.140027  | 5.540506  |
| O  | -4.128673 | -0.650999 | -1.721741 | H | 1.714134  | 0.081362  | 4.410560  |
| Si | -4.776593 | 0.689817  | -2.476156 | C | 0.682043  | 3.512199  | -0.526285 |
| C  | -4.681711 | 2.236925  | -1.391105 | C | -0.857274 | 3.470462  | -0.443386 |
| H  | -3.644996 | 2.513681  | -1.173449 | C | 1.210011  | 4.760550  | 0.213273  |
| H  | -5.161349 | 3.088686  | -1.891029 | H | 0.941309  | 3.620380  | -1.590843 |
| H  | -5.183678 | 2.074033  | -0.431039 | C | -1.485009 | 4.751788  | -1.012199 |
| C  | -6.583607 | 0.242155  | -2.780165 | H | -1.170911 | 3.351213  | 0.602627  |
| H  | -7.106203 | 1.034137  | -3.331433 | H | -1.234164 | 2.596123  | -0.977714 |
| H  | -6.665125 | -0.683069 | -3.362789 | C | 0.590883  | 6.045187  | -0.365435 |
| H  | -7.110803 | 0.086581  | -1.831456 | H | 0.943904  | 4.692785  | 1.276661  |
| C  | -3.934728 | 1.031471  | -4.134721 | H | 2.301002  | 4.822576  | 0.167122  |
| H  | -3.956140 | 0.137417  | -4.769705 | C | -0.942894 | 6.003977  | -0.309582 |
| H  | -4.438914 | 1.841656  | -4.677983 | H | -2.576698 | 4.699950  | -0.921430 |
| H  | -2.885526 | 1.313428  | -3.994754 | H | -1.261421 | 4.812563  | -2.087997 |
| C  | 2.075672  | 2.084310  | 1.694834  | H | 0.972166  | 6.918273  | 0.179789  |
| C  | 0.857162  | 2.085405  | 2.643596  | H | 0.914471  | 6.160744  | -1.410652 |
| C  | 3.055617  | 0.961460  | 2.086304  | H | -1.366412 | 6.911628  | -0.757641 |
| H  | 2.595421  | 3.047319  | 1.784896  | H | -1.262782 | 5.992256  | 0.743171  |
| C  | 1.274013  | 2.175616  | 4.119018  | C | 3.024693  | 1.825898  | -1.118831 |
| H  | 0.289556  | 1.160800  | 2.483392  | C | 2.671910  | 1.411010  | -2.563472 |
| H  | 0.178990  | 2.910462  | 2.397893  | C | 3.928842  | 3.070359  | -1.113355 |

|   |           |           |           |   |           |           |           |
|---|-----------|-----------|-----------|---|-----------|-----------|-----------|
| H | 3.608528  | 1.003852  | -0.690796 | H | -2.260142 | -3.046441 | 4.889219  |
| C | 3.944100  | 1.165977  | -3.390578 | H | -2.380240 | -1.686777 | 3.767245  |
| H | 2.077146  | 2.203697  | -3.041242 | C | 2.527466  | -2.735604 | 0.028110  |
| H | 2.040792  | 0.513615  | -2.548236 | C | 3.405660  | -1.768818 | -0.786338 |
| C | 5.207060  | 2.811897  | -1.930765 | C | 3.178568  | -2.981622 | 1.404731  |
| H | 3.393123  | 3.920950  | -1.555154 | H | 2.511267  | -3.702981 | -0.491970 |
| H | 4.191193  | 3.354752  | -0.086537 | C | 4.845151  | -2.278034 | -0.941958 |
| C | 4.873400  | 2.388896  | -3.369481 | H | 3.415524  | -0.810117 | -0.258727 |
| H | 3.676459  | 0.905662  | -4.422413 | H | 2.964245  | -1.571198 | -1.768164 |
| H | 4.475858  | 0.297601  | -2.973832 | C | 4.612815  | -3.516426 | 1.249913  |
| H | 5.839610  | 3.708771  | -1.932491 | H | 3.218741  | -2.042841 | 1.971844  |
| H | 5.789399  | 2.015551  | -1.443515 | H | 2.587044  | -3.685353 | 2.000019  |
| H | 5.794170  | 2.178782  | -3.928061 | C | 5.483862  | -2.558121 | 0.425310  |
| H | 4.377305  | 3.225875  | -3.883090 | H | 5.442007  | -1.545205 | -1.501515 |
| P | 1.473912  | 1.854999  | -0.065645 | H | 4.841084  | -3.201871 | -1.539147 |
| C | -0.031469 | -2.819446 | 1.584816  | H | 5.056721  | -3.680798 | 2.240266  |
| C | 0.232116  | -1.854368 | 2.760564  | H | 4.580716  | -4.496989 | 0.752183  |
| C | -1.550604 | -3.056902 | 1.469675  | H | 6.494833  | -2.966806 | 0.302997  |
| H | 0.451490  | -3.784507 | 1.795044  | H | 5.590286  | -1.609278 | 0.973195  |
| C | -0.354738 | -2.370487 | 4.082702  | C | 0.001754  | -3.157614 | -1.360435 |
| H | -0.234070 | -0.892408 | 2.512984  | C | 0.549699  | -2.729069 | -2.736858 |
| H | 1.302614  | -1.664730 | 2.880652  | C | 0.080580  | -4.689284 | -1.215270 |
| C | -2.141941 | -3.590999 | 2.784523  | H | -1.054437 | -2.862251 | -1.339055 |
| H | -2.035372 | -2.107823 | 1.233635  | C | -0.243073 | -3.401232 | -3.868099 |
| H | -1.786212 | -3.749858 | 0.656210  | H | 1.606888  | -3.020830 | -2.820584 |
| C | -1.860240 | -2.636595 | 3.952672  | H | 0.502363  | -1.637831 | -2.828617 |
| H | -0.160041 | -1.641485 | 4.881015  | C | -0.714011 | -5.375553 | -2.341401 |
| H | 0.160465  | -3.299091 | 4.371258  | H | 1.128342  | -5.016664 | -1.273310 |
| H | -3.223197 | -3.732383 | 2.663270  | H | -0.294264 | -5.017487 | -0.239187 |
| H | -1.712538 | -4.580183 | 3.005515  | C | -0.222535 | -4.931445 | -3.727838 |

|               |           |           |           |    |           |           |           |
|---------------|-----------|-----------|-----------|----|-----------|-----------|-----------|
| H             | 0.163432  | -3.102571 | -4.843051 | Si | -1.814745 | -4.104821 | -1.235692 |
| H             | -1.281676 | -3.042258 | -3.833954 | C  | -3.506374 | -4.284083 | -0.427219 |
| H             | -0.641046 | -6.466400 | -2.242196 | H  | -4.157593 | -3.440776 | -0.682294 |
| H             | -1.777899 | -5.118689 | -2.233746 | H  | -4.002485 | -5.204603 | -0.758609 |
| H             | -0.831698 | -5.396344 | -4.513377 | H  | -3.423309 | -4.323060 | 0.664722  |
| H             | 0.807592  | -5.290544 | -3.873959 | C  | -0.699050 | -5.554043 | -0.781646 |
| P             | 0.731912  | -2.106039 | 0.012600  | H  | 0.312824  | -5.413653 | -1.177062 |
| Ni            | 0.062878  | 0.038393  | -0.527272 | H  | -0.608345 | -5.668780 | 0.303551  |
| H             | -2.766687 | -1.766377 | -0.767702 | H  | -1.100070 | -6.489137 | -1.193905 |
| C             | -1.691964 | -0.100111 | -1.538090 | C  | -1.983335 | -4.029634 | -3.114205 |
| H             | -1.563938 | -0.621139 | -2.498210 | H  | -2.401809 | -4.967730 | -3.500357 |
| H             | -1.908131 | 0.948236  | -1.807149 | H  | -2.641664 | -3.212934 | -3.430333 |
|               |           |           |           | H  | -1.008350 | -3.880455 | -3.592207 |
| <b>TS2A-2</b> |           |           |           | C  | -2.522649 | 2.341529  | 0.933987  |
| C             | 3.524738  | -3.400893 | -0.151310 | C  | -1.908789 | 2.507178  | 2.335658  |
| C             | 2.469247  | -2.822748 | -0.848737 | C  | -2.116088 | 3.534746  | 0.046376  |
| C             | 1.178151  | -2.719921 | -0.285115 | H  | -3.614575 | 2.349634  | 1.051645  |
| C             | 1.003534  | -3.294150 | 0.993632  | C  | -2.300613 | 3.851944  | 2.971600  |
| C             | 2.064383  | -3.876387 | 1.681980  | H  | -0.819522 | 2.448093  | 2.260623  |
| C             | 3.354377  | -3.928590 | 1.137104  | H  | -2.221460 | 1.692264  | 2.994911  |
| H             | 4.503743  | -3.455150 | -0.625018 | C  | -2.511270 | 4.880286  | 0.674729  |
| H             | 2.643318  | -2.467027 | -1.859059 | H  | -1.030673 | 3.502090  | -0.089226 |
| H             | 0.018801  | -3.280141 | 1.444243  | H  | -2.549487 | 3.452459  | -0.956879 |
| H             | 1.885552  | -4.295839 | 2.670349  | C  | -1.909829 | 5.036382  | 2.077588  |
| C             | 4.517536  | -4.508724 | 1.905027  | H  | -1.829829 | 3.944965  | 3.958959  |
| H             | 4.180331  | -5.207360 | 2.678767  | H  | -3.388097 | 3.869539  | 3.138419  |
| H             | 5.209255  | -5.045606 | 1.244975  | H  | -2.189377 | 5.704917  | 0.025494  |
| H             | 5.098338  | -3.722669 | 2.408175  | H  | -3.607907 | 4.941855  | 0.739964  |
| C             | 0.043502  | -2.127259 | -1.005601 | H  | -2.230828 | 5.982864  | 2.530859  |
| O             | -1.219064 | -2.643791 | -0.636158 | H  | -0.813789 | 5.081463  | 1.995511  |

|   |           |           |           |   |           |           |           |
|---|-----------|-----------|-----------|---|-----------|-----------|-----------|
| C | -2.759202 | -0.614952 | 1.220740  | H | -6.305935 | 2.079032  | -2.512105 |
| C | -1.686808 | -1.048495 | 2.243698  | H | -4.739419 | 2.186932  | -3.312819 |
| C | -4.114748 | -0.372717 | 1.907077  | H | -6.011509 | 0.260497  | -4.230610 |
| H | -2.866982 | -1.462990 | 0.536975  | H | -6.228145 | -0.399021 | -2.609677 |
| C | -2.135939 | -2.293767 | 3.019413  | P | -2.081573 | 0.716318  | 0.083038  |
| H | -1.484751 | -0.239534 | 2.957424  | C | 2.687034  | 0.974199  | 1.571355  |
| H | -0.747360 | -1.243934 | 1.717436  | C | 1.536510  | 1.285508  | 2.549777  |
| C | -4.557816 | -1.621265 | 2.691299  | C | 3.170759  | -0.473550 | 1.804814  |
| H | -4.045391 | 0.479158  | 2.597203  | H | 3.518067  | 1.670874  | 1.754451  |
| H | -4.880356 | -0.113834 | 1.167987  | C | 1.893470  | 0.999991  | 4.015349  |
| C | -3.491433 | -2.064660 | 3.704442  | H | 0.673628  | 0.672053  | 2.259765  |
| H | -1.373181 | -2.571978 | 3.758873  | H | 1.220738  | 2.326251  | 2.451986  |
| H | -2.220317 | -3.136158 | 2.318142  | C | 3.530269  | -0.754395 | 3.270618  |
| H | -5.510466 | -1.426541 | 3.201133  | H | 2.370428  | -1.157037 | 1.506339  |
| H | -4.741584 | -2.440102 | 1.980265  | H | 4.030529  | -0.714600 | 1.175264  |
| H | -3.817544 | -2.973945 | 4.225596  | C | 2.352581  | -0.450226 | 4.203036  |
| H | -3.378059 | -1.284652 | 4.472528  | H | 1.024499  | 1.218068  | 4.650516  |
| C | -3.265521 | 0.773161  | -1.402961 | H | 2.697318  | 1.679730  | 4.336249  |
| C | -3.500789 | -0.635155 | -1.979561 | H | 3.834491  | -1.804171 | 3.366541  |
| C | -4.622631 | 1.497261  | -1.267087 | H | 4.395485  | -0.141007 | 3.565273  |
| H | -2.662387 | 1.323816  | -2.139454 | H | 2.625462  | -0.638654 | 5.249400  |
| C | -4.204407 | -0.573437 | -3.343128 | H | 1.520482  | -1.128211 | 3.960922  |
| H | -4.132039 | -1.206623 | -1.284374 | C | 2.196387  | 3.000953  | -0.644432 |
| H | -2.555532 | -1.170900 | -2.048102 | C | 1.287968  | 3.304055  | -1.857274 |
| C | -5.339992 | 1.570255  | -2.627562 | C | 1.888557  | 3.971082  | 0.511648  |
| H | -5.261740 | 0.958190  | -0.555346 | H | 3.237350  | 3.183116  | -0.946836 |
| H | -4.506404 | 2.511807  | -0.875565 | C | 1.390509  | 4.772707  | -2.296167 |
| C | -5.538679 | 0.178717  | -3.243574 | H | 0.253810  | 3.056327  | -1.594143 |
| H | -4.368592 | -1.588550 | -3.728472 | H | 1.533075  | 2.646182  | -2.695269 |
| H | -3.548510 | -0.063573 | -4.064328 | C | 1.994808  | 5.438647  | 0.065098  |

|    |           |           |           |                |           |           |           |
|----|-----------|-----------|-----------|----------------|-----------|-----------|-----------|
| H  | 0.873584  | 3.787077  | 0.884453  | H              | 1.102405  | -1.336561 | -2.700287 |
| H  | 2.570903  | 3.795961  | 1.351363  | H              | -0.695041 | -1.472050 | -2.903214 |
| C  | 1.087684  | 5.732280  | -1.137358 |                |           |           |           |
| H  | 0.706981  | 4.957521  | -3.135057 | <b>INT2A-2</b> |           |           |           |
| H  | 2.407020  | 4.969549  | -2.669852 | C              | 0.749916  | -4.534344 | -0.154953 |
| H  | 1.744179  | 6.099477  | 0.905445  | C              | 0.119131  | -3.499749 | -0.846979 |
| H  | 3.038252  | 5.657262  | -0.207060 | C              | -0.881750 | -2.704215 | -0.249510 |
| H  | 1.206326  | 6.774875  | -1.459078 | C              | -1.256067 | -3.067974 | 1.065685  |
| H  | 0.037763  | 5.613466  | -0.834447 | C              | -0.632351 | -4.107487 | 1.746587  |
| C  | 3.528780  | 0.478236  | -1.192004 | C              | 0.403512  | -4.853364 | 1.163460  |
| C  | 3.332261  | 0.610965  | -2.715401 | H              | 1.520542  | -5.115624 | -0.660299 |
| C  | 4.935486  | 0.987470  | -0.814892 | H              | 0.400293  | -3.320314 | -1.876845 |
| H  | 3.488276  | -0.589926 | -0.955589 | H              | -2.056954 | -2.519762 | 1.547368  |
| C  | 4.393697  | -0.201881 | -3.474385 | H              | -0.955213 | -4.346916 | 2.758880  |
| H  | 3.430657  | 1.666235  | -3.006306 | C              | 1.127430  | -5.929582 | 1.936700  |
| H  | 2.321431  | 0.303154  | -3.000213 | H              | 1.932778  | -5.507685 | 2.555797  |
| C  | 6.015864  | 0.184118  | -1.562174 | H              | 0.450816  | -6.464252 | 2.613818  |
| H  | 5.032273  | 2.049480  | -1.081444 | H              | 1.586337  | -6.667380 | 1.268531  |
| H  | 5.111405  | 0.919335  | 0.263585  | C              | -1.491952 | -1.524290 | -0.935173 |
| C  | 5.812084  | 0.240603  | -3.083530 | O              | -2.852033 | -1.318733 | -0.438860 |
| H  | 4.246693  | -0.097483 | -4.557225 | Si             | -4.217584 | -2.225747 | -0.786594 |
| H  | 4.268535  | -1.269672 | -3.240533 | C              | -5.421819 | -1.863913 | 0.621245  |
| H  | 7.013726  | 0.557299  | -1.297324 | H              | -5.525151 | -0.783624 | 0.776835  |
| H  | 5.971989  | -0.863363 | -1.228311 | H              | -6.417836 | -2.267266 | 0.399846  |
| H  | 6.562086  | -0.377920 | -3.592953 | H              | -5.083217 | -2.306829 | 1.564582  |
| H  | 5.969588  | 1.274017  | -3.427075 | C              | -3.881474 | -4.082112 | -0.890032 |
| P  | 2.073801  | 1.160254  | -0.210005 | H              | -4.809495 | -4.622064 | -1.120840 |
| Ni | 0.044920  | 0.176934  | -0.603227 | H              | -3.150571 | -4.320793 | -1.670654 |
| C  | 0.137295  | -1.407090 | -2.213268 | H              | -3.481396 | -4.467680 | 0.053129  |
| H  | -0.062469 | 0.290613  | -2.189170 | C              | -5.036799 | -1.669938 | -2.402202 |



|   |           |           |           |   |           |           |           |
|---|-----------|-----------|-----------|---|-----------|-----------|-----------|
| H | -5.953259 | -2.248307 | -2.578372 | C | 4.320261  | -3.005721 | -3.472340 |
| H | -5.316101 | -0.610769 | -2.367767 | H | 2.336426  | -2.883244 | -4.363698 |
| H | -4.380498 | -1.814675 | -3.266896 | H | 2.391912  | -3.726398 | -2.816329 |
| C | 3.480392  | 1.327166  | -0.577424 | H | 6.072671  | -2.941453 | -2.184194 |
| C | 3.097522  | 1.983237  | -1.922083 | H | 4.678994  | -3.753277 | -1.472024 |
| C | 3.554611  | 2.381990  | 0.541589  | H | 4.585299  | -3.958164 | -3.948313 |
| H | 4.485100  | 0.898964  | -0.681194 | H | 4.712234  | -2.208261 | -4.121175 |
| C | 4.033732  | 3.146804  | -2.283978 | C | 2.643588  | -0.528220 | 1.587564  |
| H | 2.061149  | 2.341648  | -1.861377 | C | 1.634509  | -1.582598 | 2.076147  |
| H | 3.114831  | 1.238800  | -2.725363 | C | 4.073905  | -0.939585 | 1.981594  |
| C | 4.501141  | 3.534462  | 0.166900  | H | 2.401942  | 0.410709  | 2.107924  |
| H | 2.555074  | 2.782547  | 0.730592  | C | 1.747351  | -1.816681 | 3.588289  |
| H | 3.893438  | 1.929977  | 1.479921  | H | 1.795369  | -2.531167 | 1.549966  |
| C | 4.099971  | 4.190748  | -1.161027 | H | 0.618517  | -1.268517 | 1.826333  |
| H | 3.702832  | 3.610558  | -3.221954 | C | 4.185907  | -1.143816 | 3.502685  |
| H | 5.044028  | 2.751526  | -2.467230 | H | 4.321412  | -1.887895 | 1.487015  |
| H | 4.516349  | 4.278318  | 0.973727  | H | 4.810452  | -0.200859 | 1.641898  |
| H | 5.525868  | 3.143110  | 0.082558  | C | 3.178446  | -2.193800 | 3.995639  |
| H | 4.806320  | 4.989004  | -1.421297 | H | 1.040410  | -2.600701 | 3.886182  |
| H | 3.115320  | 4.665864  | -1.046656 | H | 1.448757  | -0.899667 | 4.118787  |
| C | 3.037957  | -1.513416 | -1.226389 | H | 5.209725  | -1.440184 | 3.765193  |
| C | 2.404485  | -1.572381 | -2.632742 | H | 3.993872  | -0.187154 | 4.011352  |
| C | 4.572354  | -1.593718 | -1.375575 | H | 3.252453  | -2.313343 | 5.084046  |
| H | 2.691602  | -2.403968 | -0.682689 | H | 3.431817  | -3.168576 | 3.551952  |
| C | 2.794817  | -2.864471 | -3.366642 | P | 2.304222  | -0.098914 | -0.209724 |
| H | 2.743470  | -0.713708 | -3.227895 | C | -2.249592 | 2.421869  | -1.316969 |
| H | 1.319444  | -1.480517 | -2.553601 | C | -1.368460 | 2.289378  | -2.582330 |
| C | 4.980008  | -2.894833 | -2.090610 | C | -3.605874 | 1.729194  | -1.543281 |
| H | 4.924452  | -0.742563 | -1.975586 | H | -2.442987 | 3.490011  | -1.136328 |
| H | 5.080836  | -1.527514 | -0.410923 | C | -2.077577 | 2.805106  | -3.843434 |

|   |           |          |           |              |           |           |           |
|---|-----------|----------|-----------|--------------|-----------|-----------|-----------|
| H | -1.110606 | 1.229770 | -2.709571 | C            | -1.937277 | 0.268702  | 2.474656  |
| H | -0.415902 | 2.814707 | -2.447868 | C            | -3.439577 | 2.276975  | 2.065214  |
| C | -4.309426 | 2.253987 | -2.805065 | H            | -3.195333 | 0.542851  | 0.800557  |
| H | -3.443012 | 0.652062 | -1.627491 | C            | -3.019140 | -0.359949 | 3.363654  |
| H | -4.261753 | 1.876929 | -0.678218 | H            | -1.229567 | 0.818093  | 3.108779  |
| C | -3.425482 | 2.101780 | -4.049289 | H            | -1.366181 | -0.511893 | 1.966950  |
| H | -1.430093 | 2.662314 | -4.718510 | C            | -4.527615 | 1.634998  | 2.944178  |
| H | -2.245761 | 3.888802 | -3.748892 | H            | -2.824859 | 2.932894  | 2.697009  |
| H | -5.260294 | 1.723648 | -2.945425 | H            | -3.900298 | 2.920011  | 1.304330  |
| H | -4.560487 | 3.316988 | -2.668313 | C            | -3.913811 | 0.710281  | 4.006705  |
| H | -3.935846 | 2.500059 | -4.935564 | H            | -2.552437 | -0.984871 | 4.136484  |
| H | -3.250645 | 1.032207 | -4.237270 | H            | -3.638607 | -1.024479 | 2.748081  |
| C | -0.676923 | 3.399944 | 0.899711  | H            | -5.134546 | 2.415410  | 3.421711  |
| C | 0.085665  | 3.200306 | 2.223859  | H            | -5.207366 | 1.051339  | 2.306864  |
| C | 0.156136  | 4.237966 | -0.090051 | H            | -4.705879 | 0.239305  | 4.602883  |
| H | -1.587670 | 3.975752 | 1.120892  | H            | -3.312114 | 1.314409  | 4.702821  |
| C | 0.545701  | 4.535596 | 2.832374  | P            | -1.274805 | 1.758196  | 0.164467  |
| H | 0.952297  | 2.548697 | 2.050462  | Ni           | -0.060012 | -0.094585 | -0.464779 |
| H | -0.545263 | 2.680185 | 2.949456  | C            | -1.540110 | -1.636883 | -2.462873 |
| C | 0.617203  | 5.569019 | 0.528103  | H            | -0.546127 | -1.585553 | -2.915757 |
| H | 1.028645  | 3.658523 | -0.411994 | H            | -2.006280 | -2.572724 | -2.817609 |
| H | -0.423359 | 4.452737 | -0.993829 | H            | -2.113576 | -0.801465 | -2.872659 |
| C | 1.378123  | 5.362461 | 1.844267  |              |           |           |           |
| H | 1.115570  | 4.348332 | 3.751751  | <b>INT1B</b> |           |           |           |
| H | -0.342165 | 5.115075 | 3.126245  | C            | 2.920055  | 1.594646  | -0.684880 |
| H | 1.240145  | 6.115426 | -0.192356 | C            | 2.610721  | 1.579799  | -2.197775 |
| H | -0.265812 | 6.197107 | 0.718005  | C            | 2.548744  | 2.956316  | -0.069212 |
| H | 1.644257  | 6.331226 | 2.285990  | H            | 4.001606  | 1.462435  | -0.553736 |
| H | 2.323047  | 4.842302 | 1.640269  | C            | 3.280363  | 2.750393  | -2.934581 |
| C | -2.562543 | 1.194959 | 1.410964  | H            | 1.521796  | 1.625458  | -2.337648 |

|   |          |           |           |   |           |           |           |
|---|----------|-----------|-----------|---|-----------|-----------|-----------|
| H | 2.937290 | 0.633667  | -2.643148 | C | 3.765494  | 0.655604  | 2.475411  |
| C | 3.239495 | 4.113835  | -0.809281 | H | 1.751040  | 1.349367  | 2.157574  |
| H | 1.464922 | 3.094510  | -0.122419 | C | 1.655258  | -0.328022 | 4.305611  |
| H | 2.817697 | 2.991080  | 0.992359  | H | 2.194034  | -1.630372 | 2.664395  |
| C | 2.907584 | 4.100506  | -2.307711 | H | 0.631739  | -0.857710 | 2.457980  |
| H | 3.001859 | 2.728536  | -3.995830 | C | 3.773332  | 1.028448  | 3.968414  |
| H | 4.372432 | 2.623594  | -2.892887 | H | 4.340368  | -0.270173 | 2.339760  |
| H | 2.945545 | 5.070577  | -0.359012 | H | 4.272112  | 1.431733  | 1.889512  |
| H | 4.328227 | 4.027308  | -0.677936 | C | 3.077092  | -0.047888 | 4.815515  |
| H | 3.427560 | 4.918399  | -2.821994 | H | 1.194625  | -1.139268 | 4.883304  |
| H | 1.830600 | 4.278508  | -2.440401 | H | 1.028927  | 0.563632  | 4.459053  |
| C | 3.180808 | -1.326422 | -0.294494 | H | 4.804748  | 1.177774  | 4.312678  |
| C | 2.638047 | -2.084266 | -1.525539 | H | 3.254332  | 1.989538  | 4.101012  |
| C | 4.686316 | -1.051134 | -0.485708 | H | 3.054566  | 0.252617  | 5.870626  |
| H | 3.062712 | -1.994286 | 0.572020  | H | 3.663951  | -0.976991 | 4.764335  |
| C | 3.403219 | -3.394878 | -1.759062 | P | 2.064882  | 0.136211  | 0.142728  |
| H | 2.731941 | -1.451478 | -2.419026 | C | -2.791253 | 0.567645  | -1.810057 |
| H | 1.569873 | -2.281040 | -1.400938 | C | -1.773410 | 0.215077  | -2.921396 |
| C | 5.458162 | -2.365549 | -0.697270 | C | -3.823739 | -0.568778 | -1.671964 |
| H | 4.829730 | -0.416847 | -1.371747 | H | -3.331898 | 1.481538  | -2.099833 |
| H | 5.107542 | -0.504074 | 0.363052  | C | -2.457788 | -0.088676 | -4.261197 |
| C | 4.912006 | -3.147540 | -1.900855 | H | -1.209628 | -0.668301 | -2.590888 |
| H | 3.009842 | -3.900218 | -2.649800 | H | -1.037694 | 1.017421  | -3.047473 |
| H | 3.224042 | -4.070280 | -0.910107 | C | -4.499536 | -0.892163 | -3.015495 |
| H | 6.526543 | -2.152321 | -0.831592 | H | -3.318561 | -1.464327 | -1.292377 |
| H | 5.370501 | -2.983143 | 0.208852  | H | -4.595796 | -0.302620 | -0.941659 |
| H | 5.448444 | -4.097929 | -2.014593 | C | -3.476239 | -1.225358 | -4.109662 |
| H | 5.097658 | -2.567800 | -2.817480 | H | -1.701585 | -0.348125 | -5.013375 |
| C | 2.326050 | 0.427819  | 1.978668  | H | -2.969396 | 0.815672  | -4.625151 |
| C | 1.654051 | -0.684631 | 2.811448  | H | -5.200866 | -1.725492 | -2.880009 |

|   |           |           |           |    |           |           |           |
|---|-----------|-----------|-----------|----|-----------|-----------|-----------|
| H | -5.098170 | -0.025137 | -3.333995 | C  | -4.490658 | 0.801573  | 3.753366  |
| H | -3.985915 | -1.417197 | -5.062488 | H  | -2.759771 | -0.249121 | 4.554871  |
| H | -2.944230 | -2.148498 | -3.840326 | H  | -3.644426 | -1.142881 | 3.320964  |
| C | -1.815686 | 2.833176  | -0.274945 | H  | -6.051088 | 1.702748  | 2.530364  |
| C | -1.191730 | 3.433885  | 1.001152  | H  | -5.635629 | 0.049703  | 2.077685  |
| C | -1.123294 | 3.378520  | -1.540120 | H  | -5.189273 | 0.409908  | 4.503589  |
| H | -2.867327 | 3.152670  | -0.319012 | H  | -4.141963 | 1.776870  | 4.126046  |
| C | -1.161541 | 4.970968  | 0.961463  | P  | -1.834610 | 0.942025  | -0.218950 |
| H | -0.173603 | 3.043147  | 1.127983  | Ni | -0.140571 | -0.624672 | -0.108353 |
| H | -1.751905 | 3.112298  | 1.884259  | Si | -1.019483 | -2.848837 | 0.121973  |
| C | -1.092082 | 4.916022  | -1.563542 | C  | -1.481289 | -3.800940 | -1.502707 |
| H | -0.099948 | 2.988179  | -1.594584 | C  | -0.438039 | -3.756688 | -2.628754 |
| H | -1.638124 | 3.022084  | -2.438311 | H  | -2.432970 | -3.397102 | -1.877032 |
| C | -0.457220 | 5.499515  | -0.294678 | H  | -1.693988 | -4.850674 | -1.253747 |
| H | -0.674194 | 5.356623  | 1.866259  | H  | -0.768287 | -4.299698 | -3.525564 |
| H | -2.195555 | 5.346472  | 0.977390  | H  | -0.217787 | -2.725263 | -2.933260 |
| H | -0.552238 | 5.261056  | -2.455194 | H  | 0.510450  | -4.207131 | -2.309977 |
| H | -2.121769 | 5.291952  | -1.655840 | C  | 0.396037  | -3.904260 | 0.932972  |
| H | -0.495074 | 6.595980  | -0.320296 | C  | 0.137920  | -5.399073 | 1.185144  |
| H | 0.605108  | 5.224746  | -0.259970 | H  | 0.653867  | -3.414769 | 1.884318  |
| C | -3.042251 | 0.580710  | 1.175721  | H  | 1.290604  | -3.797855 | 0.304094  |
| C | -2.314385 | 0.354406  | 2.517781  | H  | 1.027571  | -5.912932 | 1.577552  |
| C | -4.242273 | 1.531196  | 1.336676  | H  | -0.667363 | -5.547259 | 1.913724  |
| H | -3.437866 | -0.398743 | 0.889859  | H  | -0.156782 | -5.918154 | 0.264728  |
| C | -3.288005 | -0.141385 | 3.598573  | C  | -2.561023 | -3.133359 | 1.268326  |
| H | -1.836171 | 1.281803  | 2.859416  | C  | -3.368371 | -4.428682 | 1.067640  |
| H | -1.514182 | -0.377955 | 2.363651  | H  | -3.248111 | -2.285825 | 1.155308  |
| C | -5.210005 | 1.007346  | 2.411830  | H  | -2.203372 | -3.076615 | 2.308206  |
| H | -3.897099 | 2.530541  | 1.633763  | H  | -4.199187 | -4.509147 | 1.783273  |
| H | -4.769182 | 1.653494  | 0.381497  | H  | -3.801289 | -4.470910 | 0.060931  |

|               |           |           |           |   |           |           |           |
|---------------|-----------|-----------|-----------|---|-----------|-----------|-----------|
| H             | -2.748088 | -5.323264 | 1.185031  | H | 3.481649  | -4.320288 | 3.007788  |
|               |           |           |           | H | 3.481730  | -2.550230 | 2.944443  |
|               |           |           |           | C | -2.104516 | -2.271374 | 1.808802  |
| <b>TS2B-1</b> |           |           |           | C | -1.067638 | -3.406315 | 1.972761  |
| C             | 5.352084  | 0.286723  | 1.774654  | C | -1.982837 | -1.218257 | 2.930460  |
| C             | 4.024809  | -0.106282 | 1.612229  | H | -3.098279 | -2.733654 | 1.872352  |
| C             | 3.478476  | -0.388273 | 0.345366  | C | -1.039052 | -3.977898 | 3.400033  |
| C             | 4.357353  | -0.275843 | -0.741607 | H | -0.071340 | -3.051420 | 1.696863  |
| C             | 5.679936  | 0.135079  | -0.586238 | H | -1.303964 | -4.219323 | 1.281495  |
| C             | 6.206092  | 0.433667  | 0.675207  | C | -1.959517 | -1.837336 | 4.334677  |
| H             | 5.728050  | 0.486262  | 2.776330  | H | -1.069555 | -0.637851 | 2.765591  |
| H             | 3.399670  | -0.206829 | 2.491177  | H | -2.812864 | -0.506585 | 2.863541  |
| H             | 4.016925  | -0.513238 | -1.735831 | C | -0.846892 | -2.884169 | 4.456401  |
| H             | 6.314580  | 0.218047  | -1.466059 | H | -0.242613 | -4.730292 | 3.471210  |
| C             | 7.625105  | 0.920930  | 0.842111  | H | -1.985558 | -4.502652 | 3.600119  |
| H             | 8.283748  | 0.516310  | 0.065807  | H | -1.829234 | -1.045432 | 5.083849  |
| H             | 7.675374  | 2.016158  | 0.773433  | H | -2.929060 | -2.313958 | 4.545175  |
| H             | 8.034889  | 0.637669  | 1.817919  | H | -0.834474 | -3.321245 | 5.462936  |
| C             | 2.041766  | -0.919505 | 0.261244  | H | 0.127715  | -2.396371 | 4.307533  |
| O             | 2.021396  | -2.319833 | 0.016583  | C | -2.108125 | -2.800496 | -1.130974 |
| Si            | 2.950371  | -3.540130 | 0.704575  | C | -0.760041 | -3.500233 | -1.375518 |
| C             | 4.720862  | -3.539445 | 0.053449  | C | -3.216194 | -3.853632 | -0.933537 |
| H             | 4.730892  | -3.459258 | -1.039790 | H | -2.339693 | -2.252938 | -2.053809 |
| H             | 5.306725  | -2.705751 | 0.452706  | C | -0.829339 | -4.392440 | -2.621182 |
| H             | 5.225162  | -4.475373 | 0.327741  | H | -0.501692 | -4.127442 | -0.520432 |
| C             | 2.083365  | -5.122670 | 0.159423  | H | 0.041957  | -2.768482 | -1.445388 |
| H             | 2.692707  | -6.002984 | 0.398458  | C | -3.292700 | -4.790173 | -2.154830 |
| H             | 1.116815  | -5.235426 | 0.662630  | H | -3.008226 | -4.446945 | -0.033106 |
| H             | 1.901008  | -5.120947 | -0.921224 | H | -4.190531 | -3.381358 | -0.776422 |
| C             | 2.963641  | -3.446698 | 2.590338  | C | -1.937799 | -5.445389 | -2.466799 |
| H             | 1.947217  | -3.432647 | 2.998204  |   |           |           |           |

|   |           |           |           |   |           |          |           |
|---|-----------|-----------|-----------|---|-----------|----------|-----------|
| H | 0.140414  | -4.878516 | -2.789346 | H | 2.176496  | 2.233443 | 1.887617  |
| H | -1.027479 | -3.773836 | -3.509316 | C | 2.917186  | 5.243722 | -0.540790 |
| H | -4.059156 | -5.558764 | -1.989765 | H | 1.862819  | 3.706561 | -1.620122 |
| H | -3.618471 | -4.204806 | -3.027910 | H | 0.853292  | 5.056727 | -1.127153 |
| H | -2.015756 | -6.063356 | -3.370429 | C | 4.090393  | 4.387776 | -0.048135 |
| H | -1.668913 | -6.123299 | -1.642957 | H | 4.507137  | 2.969521 | 1.548919  |
| C | -3.700975 | -0.563834 | -0.040809 | H | 3.496525  | 4.336959 | 2.029712  |
| C | -4.173654 | -0.472428 | -1.510938 | H | 3.186048  | 5.778643 | -1.461091 |
| C | -4.861803 | -1.071441 | 0.843494  | H | 2.689598  | 6.011237 | 0.214513  |
| H | -3.489526 | 0.461661  | 0.277052  | H | 4.971801  | 5.014814 | 0.138813  |
| C | -5.411772 | 0.429403  | -1.650305 | H | 4.371357  | 3.667256 | -0.830341 |
| H | -4.433911 | -1.471892 | -1.881590 | C | -1.153782 | 2.938316 | 1.904670  |
| H | -3.372211 | -0.100087 | -2.156475 | C | -2.583658 | 2.379885 | 1.986421  |
| C | -6.098641 | -0.166165 | 0.703790  | C | -0.340643 | 2.484457 | 3.134849  |
| H | -5.133751 | -2.096552 | 0.560806  | H | -1.207117 | 4.036423 | 1.925180  |
| H | -4.569727 | -1.105408 | 1.897096  | C | -3.283175 | 2.738701 | 3.306902  |
| C | -6.559148 | -0.056290 | -0.755236 | H | -2.524119 | 1.293058 | 1.886093  |
| H | -5.729221 | 0.461872  | -2.700680 | H | -3.190699 | 2.740928 | 1.150469  |
| H | -5.147577 | 1.458148  | -1.370037 | C | -1.039496 | 2.862279 | 4.451126  |
| H | -6.910976 | -0.547189 | 1.336043  | H | -0.199223 | 1.398274 | 3.086926  |
| H | -5.849228 | 0.837072  | 1.082083  | H | 0.656781  | 2.934486 | 3.124034  |
| H | -7.421635 | 0.617379  | -0.836783 | C | -2.461278 | 2.292015 | 4.522661  |
| H | -6.895865 | -1.044628 | -1.102291 | H | -4.282378 | 2.283214 | 3.328559  |
| P | -1.986993 | -1.405897 | 0.131808  | H | -3.433196 | 3.827874 | 3.351903  |
| C | 1.242373  | 3.596278  | 0.461037  | H | -0.441365 | 2.508641 | 5.300893  |
| C | 2.437229  | 2.769569  | 0.972487  | H | -1.085667 | 3.958827 | 4.532860  |
| C | 1.658527  | 4.394799  | -0.794858 | H | -2.954301 | 2.600998 | 5.453168  |
| H | 0.973703  | 4.332156  | 1.234267  | H | -2.407915 | 1.195044 | 4.540947  |
| C | 3.690525  | 3.620619  | 1.216293  | C | -1.297204 | 3.430979 | -1.010873 |
| H | 2.666674  | 1.994089  | 0.238420  | C | -2.454287 | 2.614414 | -1.609023 |

|    |           |           |           |                |           |           |           |
|----|-----------|-----------|-----------|----------------|-----------|-----------|-----------|
| C  | -1.802491 | 4.828276  | -0.598312 | H              | 1.812980  | -2.752493 | -2.371682 |
| H  | -0.569962 | 3.561711  | -1.824854 | H              | 3.239818  | -1.863129 | -2.760353 |
| C  | -3.077494 | 3.333004  | -2.814138 | H              | 2.351310  | -2.996714 | -4.780927 |
| H  | -3.228224 | 2.451325  | -0.851010 | H              | 0.810299  | -2.155734 | -4.634232 |
| H  | -2.094144 | 1.626513  | -1.897432 | H              | 2.273774  | -1.250925 | -5.027368 |
| C  | -2.418720 | 5.562903  | -1.801337 | C              | -0.394911 | -0.278596 | -2.971156 |
| H  | -2.569373 | 4.724296  | 0.181023  | C              | -0.471712 | 0.598730  | -4.231969 |
| H  | -0.997721 | 5.430038  | -0.160915 | H              | -1.189548 | 0.035235  | -2.291244 |
| C  | -3.553471 | 4.743170  | -2.435246 | H              | -0.636661 | -1.315610 | -3.230575 |
| H  | -3.911224 | 2.740381  | -3.212048 | H              | -1.459489 | 0.520890  | -4.707670 |
| H  | -2.328169 | 3.401002  | -3.616487 | H              | -0.312045 | 1.657165  | -3.995604 |
| H  | -2.787781 | 6.549068  | -1.491207 | H              | 0.275761  | 0.312851  | -4.978864 |
| H  | -1.635483 | 5.741493  | -2.553118 |                |           |           |           |
| H  | -3.955591 | 5.262918  | -3.313996 | <b>INT2B-1</b> |           |           |           |
| H  | -4.379598 | 4.658767  | -1.712873 | C              | 1.020198  | 2.596052  | 2.546564  |
| P  | -0.297348 | 2.473449  | 0.277410  | C              | 1.339912  | 1.961582  | 1.347137  |
| Ni | -0.186776 | 0.158471  | 0.010897  | C              | 2.294153  | 0.933596  | 1.290267  |
| C  | 1.138751  | -0.517897 | 1.354192  | C              | 2.910018  | 0.571452  | 2.497875  |
| H  | 0.806982  | -1.363902 | 1.951551  | C              | 2.567416  | 1.185929  | 3.702124  |
| H  | 1.514278  | 0.277531  | 1.993669  | C              | 1.612489  | 2.208899  | 3.753840  |
| Si | 1.337996  | -0.329223 | -2.059664 | H              | 0.288586  | 3.402376  | 2.544364  |
| C  | 2.254892  | 1.272372  | -2.616938 | H              | 0.835946  | 2.263332  | 0.439095  |
| C  | 3.126479  | 1.212884  | -3.883584 | H              | 3.649611  | -0.220525 | 2.493971  |
| H  | 2.871377  | 1.627904  | -1.786215 | H              | 3.051494  | 0.860699  | 4.621110  |
| H  | 1.479799  | 2.036175  | -2.755553 | C              | 1.205450  | 2.843419  | 5.062794  |
| H  | 3.654392  | 2.161837  | -4.049935 | H              | 2.010957  | 2.792521  | 5.803724  |
| H  | 3.888063  | 0.426221  | -3.819344 | H              | 0.933107  | 3.897149  | 4.932212  |
| H  | 2.529990  | 1.010878  | -4.779405 | H              | 0.332560  | 2.335053  | 5.496007  |
| C  | 2.155364  | -1.868951 | -2.917374 | C              | 2.688331  | 0.292118  | -0.034967 |
| C  | 1.881050  | -2.072096 | -4.418953 | O              | 3.184201  | -1.035216 | 0.283810  |

|    |           |           |           |   |           |           |           |
|----|-----------|-----------|-----------|---|-----------|-----------|-----------|
| Si | 4.419581  | -2.104649 | 0.011457  | C | -1.636701 | 3.346097  | -0.553536 |
| C  | 4.568453  | -2.670108 | -1.795340 | C | -0.534401 | 3.427616  | -1.633501 |
| H  | 3.695413  | -2.375121 | -2.384987 | C | -2.656919 | 4.476822  | -0.810799 |
| H  | 5.453903  | -2.260066 | -2.290820 | H | -1.164082 | 3.531514  | 0.423835  |
| H  | 4.640869  | -3.763919 | -1.836320 | C | 0.166358  | 4.794452  | -1.613184 |
| C  | 3.991831  | -3.602775 | 1.073515  | H | -0.992065 | 3.272588  | -2.621958 |
| H  | 4.794596  | -4.349665 | 1.024937  | H | 0.194428  | 2.623747  | -1.507055 |
| H  | 3.859557  | -3.317700 | 2.123222  | C | -1.969773 | 5.854291  | -0.773517 |
| H  | 3.067581  | -4.082588 | 0.738113  | H | -3.103726 | 4.340969  | -1.805112 |
| C  | 6.107995  | -1.494295 | 0.609022  | H | -3.478537 | 4.454211  | -0.093853 |
| H  | 6.070520  | -1.189186 | 1.661669  | C | -0.833167 | 5.942479  | -1.801525 |
| H  | 6.827040  | -2.321074 | 0.531882  | H | 0.944993  | 4.826762  | -2.384430 |
| H  | 6.509431  | -0.656175 | 0.032685  | H | 0.680417  | 4.914923  | -0.648663 |
| C  | -3.543318 | 1.433403  | -1.782241 | H | -2.711505 | 6.643383  | -0.952462 |
| C  | -2.871065 | 0.698845  | -2.963948 | H | -1.564338 | 6.026017  | 0.234847  |
| C  | -4.854723 | 0.734448  | -1.372530 | H | -0.323753 | 6.911516  | -1.727383 |
| H  | -3.805196 | 2.446277  | -2.111068 | H | -1.260758 | 5.886702  | -2.813790 |
| C  | -3.825729 | 0.499134  | -4.149679 | C | -3.236723 | 1.520295  | 1.226568  |
| H  | -2.514203 | -0.275282 | -2.609818 | C | -2.268325 | 1.223653  | 2.387950  |
| H  | -1.974674 | 1.242725  | -3.285943 | C | -4.178105 | 2.674377  | 1.619451  |
| C  | -5.795600 | 0.529500  | -2.571465 | H | -3.860611 | 0.626915  | 1.092350  |
| H  | -4.629328 | -0.241934 | -0.930413 | C | -3.024372 | 0.880945  | 3.679001  |
| H  | -5.373165 | 1.313396  | -0.600512 | H | -1.629936 | 2.097709  | 2.564623  |
| C  | -5.105650 | -0.227274 | -3.714020 | H | -1.595553 | 0.409488  | 2.111700  |
| H  | -3.316077 | -0.060838 | -4.944205 | C | -4.959490 | 2.317417  | 2.897119  |
| H  | -4.092950 | 1.478339  | -4.574722 | H | -3.584509 | 3.577709  | 1.812597  |
| H  | -6.695851 | -0.006006 | -2.243163 | H | -4.875102 | 2.917519  | 0.809197  |
| H  | -6.129334 | 1.511014  | -2.939791 | C | -4.012795 | 1.992130  | 4.062061  |
| H  | -5.790978 | -0.342403 | -4.563122 | H | -2.307836 | 0.704818  | 4.491645  |
| H  | -4.848981 | -1.241853 | -3.375041 | H | -3.573823 | -0.061058 | 3.533648  |



|   |           |           |           |    |           |           |           |
|---|-----------|-----------|-----------|----|-----------|-----------|-----------|
| H | -5.628862 | 3.143965  | 3.168241  | H  | -3.643239 | -1.903305 | -1.315974 |
| H | -5.600652 | 1.446531  | 2.693663  | H  | -3.098450 | -3.499644 | -1.792659 |
| H | -4.587554 | 1.707656  | 4.952555  | C  | -5.628290 | -2.833161 | 0.504586  |
| H | -3.448191 | 2.898560  | 4.327060  | H  | -5.203538 | -2.412318 | 2.597928  |
| P | -2.273316 | 1.574492  | -0.388168 | H  | -4.629760 | -3.982586 | 2.039009  |
| C | -0.383268 | -3.251129 | -1.503573 | H  | -5.573982 | -3.406575 | -1.594789 |
| C | -0.628310 | -2.498568 | -2.831925 | H  | -4.866761 | -4.588326 | -0.494836 |
| C | 1.084957  | -3.702454 | -1.412500 | H  | -6.608195 | -3.287816 | 0.697919  |
| H | -1.005976 | -4.158425 | -1.497506 | H  | -5.813966 | -1.774479 | 0.271583  |
| C | -0.198797 | -3.317435 | -4.057572 | C  | 0.087900  | -2.717468 | 1.407811  |
| H | -0.069830 | -1.554168 | -2.800624 | C  | 0.067257  | -1.688582 | 2.557443  |
| H | -1.684100 | -2.225158 | -2.925883 | C  | -0.192698 | -4.137105 | 1.938927  |
| C | 1.508900  | -4.515663 | -2.646587 | H  | 1.105531  | -2.674644 | 1.002446  |
| H | 1.725278  | -2.822148 | -1.305373 | C  | 1.050437  | -2.087088 | 3.667486  |
| H | 1.238267  | -4.315230 | -0.519128 | H  | -0.939550 | -1.610759 | 2.988422  |
| C | 1.270260  | -3.743630 | -3.949614 | H  | 0.329346  | -0.701478 | 2.165235  |
| H | -0.365532 | -2.731978 | -4.971274 | C  | 0.781047  | -4.528674 | 3.063779  |
| H | -0.831363 | -4.214784 | -4.137690 | H  | -1.213983 | -4.181439 | 2.341140  |
| H | 2.564484  | -4.798059 | -2.555302 | H  | -0.147575 | -4.874624 | 1.127348  |
| H | 0.932031  | -5.452653 | -2.674323 | C  | 0.760370  | -3.496550 | 4.200699  |
| H | 1.562229  | -4.351767 | -4.815354 | H  | 1.012893  | -1.347572 | 4.476841  |
| H | 1.907165  | -2.846815 | -3.962250 | H  | 2.069266  | -2.049773 | 3.260843  |
| C | -2.641604 | -2.975978 | 0.275575  | H  | 0.523779  | -5.525690 | 3.445413  |
| C | -3.344685 | -2.331339 | 1.484097  | H  | 1.797995  | -4.598305 | 2.657407  |
| C | -3.551862 | -2.938520 | -0.968953 | H  | 1.486498  | -3.771914 | 4.976605  |
| H | -2.446674 | -4.031875 | 0.510186  | H  | -0.231277 | -3.506390 | 4.678794  |
| C | -4.735931 | -2.926990 | 1.748031  | P  | -0.962695 | -2.163997 | -0.059202 |
| H | -3.444628 | -1.256402 | 1.297862  | Ni | -0.457484 | 0.046646  | -0.489858 |
| H | -2.729004 | -2.430153 | 2.383375  | C  | 1.513083  | 0.145705  | -1.048044 |
| C | -4.953052 | -3.510112 | -0.695042 | H  | 1.492697  | 1.038234  | -1.699878 |

|               |          |           |           |    |           |           |           |
|---------------|----------|-----------|-----------|----|-----------|-----------|-----------|
| H             | 1.813822 | -0.659272 | -1.732129 | C  | 3.058684  | -4.499112 | 0.681137  |
| Si            | 4.055122 | 1.487037  | -0.783167 | H  | 4.209284  | -3.862851 | -1.026003 |
| C             | 3.199538 | 3.099724  | -1.343014 | H  | 2.469075  | -2.450102 | -1.971704 |
| C             | 4.095170 | 4.347895  | -1.442740 | H  | -0.161097 | -3.531807 | 1.237923  |
| H             | 2.394564 | 3.311949  | -0.633444 | H  | 1.578587  | -4.976308 | 2.175562  |
| H             | 2.707410 | 2.921192  | -2.308393 | C  | 4.151094  | -5.352233 | 1.279245  |
| H             | 3.511876 | 5.229260  | -1.740999 | H  | 3.739383  | -6.204175 | 1.832545  |
| H             | 4.565354 | 4.580720  | -0.480577 | H  | 4.823549  | -5.744952 | 0.507763  |
| H             | 4.897664 | 4.224362  | -2.177768 | H  | 4.769531  | -4.778243 | 1.984203  |
| C             | 5.345926 | 1.949198  | 0.546980  | C  | -0.043450 | -1.893296 | -0.905083 |
| C             | 6.736111 | 2.353236  | 0.025419  | O  | -1.350620 | -2.423598 | -0.680553 |
| H             | 5.443477 | 1.116108  | 1.251054  | Si | -2.003278 | -3.835433 | -1.330541 |
| H             | 4.917106 | 2.769488  | 1.138721  | C  | -0.694584 | -5.096287 | -1.834634 |
| H             | 7.421482 | 2.598581  | 0.847139  | H  | -0.135885 | -5.483428 | -0.977781 |
| H             | 7.200639 | 1.546042  | -0.554152 | H  | -1.172530 | -5.938858 | -2.351328 |
| H             | 6.684775 | 3.230252  | -0.629699 | H  | 0.034572  | -4.651603 | -2.521642 |
| C             | 4.872396 | 0.682878  | -2.309771 | C  | -3.049915 | -3.469621 | -2.862260 |
| C             | 5.463651 | 1.661517  | -3.341633 | H  | -3.515583 | -4.397822 | -3.219555 |
| H             | 4.112347 | 0.058722  | -2.797250 | H  | -3.849768 | -2.748983 | -2.666177 |
| H             | 5.661045 | -0.004078 | -1.983358 | H  | -2.439629 | -3.071287 | -3.680563 |
| H             | 5.903560 | 1.125449  | -4.192668 | C  | -3.115921 | -4.492316 | 0.043379  |
| H             | 4.698012 | 2.335674  | -3.741450 | H  | -3.676271 | -5.380478 | -0.273032 |
| H             | 6.252667 | 2.283430  | -2.904252 | H  | -2.522698 | -4.762307 | 0.924884  |
|               |          |           |           | H  | -3.840644 | -3.728638 | 0.350688  |
| <b>TS2B-2</b> |          |           |           | C  | -2.080872 | 2.165389  | 1.882302  |
| C             | 3.261914 | -3.769112 | -0.496906 | C  | -1.084460 | 2.210470  | 3.051836  |
| C             | 2.273978 | -2.941260 | -1.024835 | C  | -1.913729 | 3.456111  | 1.054214  |
| C             | 1.025207 | -2.769686 | -0.388338 | H  | -3.091067 | 2.157992  | 2.310762  |
| C             | 0.808238 | -3.564303 | 0.760669  | C  | -1.288535 | 3.460028  | 3.925655  |
| C             | 1.795132 | -4.394688 | 1.281049  | H  | -0.069891 | 2.217043  | 2.645950  |

|   |           |           |           |   |           |           |           |
|---|-----------|-----------|-----------|---|-----------|-----------|-----------|
| H | -1.166280 | 1.319277  | 3.678202  | C | -4.753832 | 1.592432  | 0.414367  |
| C | -2.147358 | 4.712752  | 1.907150  | H | -3.333638 | 1.109248  | -1.102362 |
| H | -0.889216 | 3.484550  | 0.663839  | C | -5.392157 | -0.667129 | -1.393846 |
| H | -2.572444 | 3.468241  | 0.181445  | H | -4.537981 | -1.179969 | 0.507476  |
| C | -1.188739 | 4.752146  | 3.104020  | H | -3.408393 | -1.355238 | -0.825473 |
| H | -0.550935 | 3.465190  | 4.738831  | C | -5.940598 | 1.647764  | -0.565105 |
| H | -2.279832 | 3.408342  | 4.400235  | H | -5.109502 | 1.212725  | 1.380790  |
| H | -2.023381 | 5.610397  | 1.287491  | H | -4.401421 | 2.611597  | 0.590609  |
| H | -3.186652 | 4.719172  | 2.268209  | C | -6.499502 | 0.251564  | -0.864694 |
| H | -1.393084 | 5.626375  | 3.735036  | H | -5.778370 | -1.682896 | -1.551163 |
| H | -0.159273 | 4.865580  | 2.732660  | H | -5.059503 | -0.302169 | -2.374452 |
| C | -2.263530 | -0.809235 | 2.019916  | H | -6.725472 | 2.297171  | -0.155939 |
| C | -0.990843 | -1.312820 | 2.723526  | H | -5.606023 | 2.112498  | -1.504902 |
| C | -3.395427 | -0.602257 | 3.046070  | H | -7.325797 | 0.315184  | -1.584070 |
| H | -2.550674 | -1.616408 | 1.337986  | H | -6.915931 | -0.175744 | 0.059922  |
| C | -1.269341 | -2.615458 | 3.488576  | P | -1.953968 | 0.605466  | 0.809606  |
| H | -0.635449 | -0.572036 | 3.447619  | C | 2.969196  | 0.355092  | 1.857931  |
| H | -0.195249 | -1.445313 | 1.985203  | C | 2.068313  | 0.712562  | 3.053158  |
| C | -3.666441 | -1.896512 | 3.834062  | C | 3.230769  | -1.165835 | 1.860497  |
| H | -3.118689 | 0.193342  | 3.751399  | H | 3.928027  | 0.880151  | 1.975759  |
| H | -4.317157 | -0.275450 | 2.556028  | C | 2.629209  | 0.208346  | 4.392648  |
| C | -2.394224 | -2.421194 | 4.514858  | H | 1.088569  | 0.263281  | 2.884918  |
| H | -0.350662 | -2.965520 | 3.977461  | H | 1.911131  | 1.789647  | 3.122045  |
| H | -1.569897 | -3.399873 | 2.779816  | C | 3.799438  | -1.664439 | 3.196453  |
| H | -4.456820 | -1.724566 | 4.576306  | H | 2.289579  | -1.685637 | 1.663818  |
| H | -4.044638 | -2.662159 | 3.140336  | H | 3.908757  | -1.460423 | 1.057783  |
| H | -2.603238 | -3.361585 | 5.040620  | C | 2.878715  | -1.303723 | 4.366663  |
| H | -2.066886 | -1.698343 | 5.277317  | H | 1.933087  | 0.472813  | 5.199863  |
| C | -3.627605 | 0.687777  | -0.136613 | H | 3.574711  | 0.727858  | 4.610477  |
| C | -4.197543 | -0.716980 | -0.428094 | H | 3.942084  | -2.750661 | 3.138130  |

|   |          |           |           |    |           |           |           |
|---|----------|-----------|-----------|----|-----------|-----------|-----------|
| H | 4.792233 | -1.219447 | 3.364964  | C  | 5.752068  | 0.107866  | -3.002763 |
| H | 3.306829 | -1.641692 | 5.319176  | H  | 4.106408  | 0.301251  | -4.417355 |
| H | 1.919420 | -1.828011 | 4.243433  | H  | 4.008635  | -1.118501 | -3.379013 |
| C | 2.672434 | 2.762826  | 0.094092  | H  | 7.032703  | -0.131295 | -1.259610 |
| C | 1.769669 | 3.459409  | -0.938173 | H  | 5.798290  | -1.378254 | -1.429943 |
| C | 2.648063 | 3.564896  | 1.409178  | H  | 6.393253  | -0.480971 | -3.670930 |
| H | 3.704915 | 2.802862  | -0.277645 | H  | 6.043884  | 1.160938  | -3.132259 |
| C | 2.188085 | 4.914229  | -1.189306 | P  | 2.239532  | 0.906994  | 0.190620  |
| H | 0.748392 | 3.453234  | -0.547498 | Ni | -0.052014 | 0.163928  | -0.520626 |
| H | 1.735975 | 2.902773  | -1.879300 | C  | 0.118204  | -1.164700 | -2.158238 |
| C | 3.062991 | 5.029084  | 1.177606  | H  | 1.135859  | -1.122885 | -2.529423 |
| H | 1.634479 | 3.547153  | 1.831166  | H  | -0.552864 | -1.501384 | -2.950151 |
| H | 3.315025 | 3.116206  | 2.152541  | Si | -0.782929 | 0.819545  | -2.794956 |
| C | 2.184237 | 5.712890  | 0.121167  | C  | 0.352578  | 1.103539  | -4.328388 |
| H | 1.512205 | 5.372424  | -1.922365 | H  | -0.276834 | 1.702753  | -5.002530 |
| H | 3.196421 | 4.935279  | -1.629357 | H  | 1.185298  | 1.767304  | -4.062200 |
| H | 3.019320 | 5.578338  | 2.127062  | C  | -2.359776 | 0.039575  | -3.575602 |
| H | 4.111959 | 5.055131  | 0.846964  | H  | -2.025221 | -0.690930 | -4.325608 |
| H | 2.522197 | 6.742715  | -0.049794 | H  | -2.886223 | -0.551311 | -2.821492 |
| H | 1.152039 | 5.776966  | 0.497956  | C  | -1.301241 | 2.625553  | -2.294373 |
| C | 3.578402 | 0.239464  | -0.969373 | H  | -2.373344 | 2.596897  | -2.067251 |
| C | 3.364052 | 0.709191  | -2.417794 | H  | -0.818905 | 2.871382  | -1.352837 |
| C | 5.055184 | 0.463372  | -0.578049 | C  | 0.888100  | -0.100089 | -5.120497 |
| H | 3.397172 | -0.838475 | -0.946984 | H  | 1.364645  | 0.218938  | -6.056767 |
| C | 4.276017 | -0.051271 | -3.392171 | H  | 1.636439  | -0.667892 | -4.558749 |
| H | 3.587711 | 1.782822  | -2.496450 | H  | 0.086356  | -0.799323 | -5.388334 |
| H | 2.318604 | 0.587488  | -2.698164 | C  | -3.335876 | 1.012336  | -4.254778 |
| C | 5.985029 | -0.299653 | -1.540740 | H  | -2.837394 | 1.616592  | -5.022667 |
| H | 5.299033 | 1.534339  | -0.621529 | H  | -4.160445 | 0.478410  | -4.745573 |
| H | 5.256579 | 0.138084  | 0.446458  | H  | -3.787115 | 1.709263  | -3.538710 |

|                |           |           |           |   |           |           |           |
|----------------|-----------|-----------|-----------|---|-----------|-----------|-----------|
| C              | -1.035022 | 3.756821  | -3.301265 | H | -2.970754 | 3.992970  | 1.667072  |
| H              | -1.369621 | 4.724481  | -2.902206 | C | 0.720620  | 5.335327  | 0.683985  |
| H              | 0.031906  | 3.851625  | -3.531364 | H | 0.726090  | 6.242403  | 1.302403  |
| H              | -1.560688 | 3.595571  | -4.248959 | H | 1.743245  | 4.941895  | 0.672643  |
|                |           |           |           | H | 0.460265  | 5.629470  | -0.336205 |
| <b>INT2B-2</b> |           |           |           | C | 3.631447  | -1.477574 | 0.013781  |
| C              | -4.154831 | 0.620327  | 2.709380  | C | 3.533015  | -2.598198 | 1.065086  |
| C              | -3.464304 | 0.976509  | 1.546678  | C | 3.526680  | -2.080877 | -1.403071 |
| C              | -2.078771 | 1.233505  | 1.556888  | H | 4.621753  | -1.017939 | 0.126758  |
| C              | -1.448759 | 1.141778  | 2.817612  | C | 4.583519  | -3.695306 | 0.818518  |
| C              | -2.138156 | 0.805304  | 3.975441  | H | 2.531909  | -3.039040 | 1.036313  |
| C              | -3.514332 | 0.525393  | 3.947856  | H | 3.673046  | -2.193557 | 2.071433  |
| H              | -5.224312 | 0.424488  | 2.647588  | C | 4.583408  | -3.166894 | -1.648971 |
| H              | -4.025515 | 1.062803  | 0.622451  | H | 2.530981  | -2.521126 | -1.512546 |
| H              | -0.388643 | 1.343843  | 2.868361  | H | 3.604107  | -1.306666 | -2.174478 |
| H              | -1.596393 | 0.747644  | 4.918604  | C | 4.482755  | -4.279109 | -0.596750 |
| C              | -4.261493 | 0.160858  | 5.208994  | H | 4.470024  | -4.487170 | 1.569966  |
| H              | -3.742863 | -0.626016 | 5.771485  | H | 5.587657  | -3.268576 | 0.960311  |
| H              | -4.360963 | 1.022289  | 5.883415  | H | 4.464410  | -3.580361 | -2.658760 |
| H              | -5.271416 | -0.200148 | 4.986073  | H | 5.585747  | -2.715323 | -1.609477 |
| C              | -1.269037 | 1.547482  | 0.333082  | H | 5.262973  | -5.033810 | -0.756764 |
| O              | -0.282398 | 2.618760  | 0.647868  | H | 3.517226  | -4.794416 | -0.709399 |
| Si             | -0.485419 | 4.086959  | 1.437853  | C | 2.611660  | 0.660166  | 1.891132  |
| C              | 0.019069  | 4.018757  | 3.265290  | C | 1.868497  | -0.168587 | 2.965051  |
| H              | 0.991038  | 3.523545  | 3.386027  | C | 4.054307  | 0.961760  | 2.336285  |
| H              | 0.126131  | 5.042574  | 3.647369  | H | 2.066508  | 1.611167  | 1.801790  |
| H              | -0.707818 | 3.496270  | 3.892909  | C | 1.907796  | 0.513739  | 4.340056  |
| C              | -2.252678 | 4.740716  | 1.313664  | H | 2.321644  | -1.161141 | 3.061035  |
| H              | -2.369908 | 5.642895  | 1.928071  | H | 0.832933  | -0.330218 | 2.652263  |
| H              | -2.513505 | 5.001133  | 0.281573  | C | 4.080654  | 1.642243  | 3.716287  |

|   |           |           |           |   |           |           |           |
|---|-----------|-----------|-----------|---|-----------|-----------|-----------|
| H | 4.631012  | 0.026869  | 2.382492  | H | -1.834364 | -4.037162 | 0.962245  |
| H | 4.555325  | 1.604185  | 1.605944  | C | -0.113905 | -4.005013 | 3.231645  |
| C | 3.350239  | 0.806116  | 4.776130  | H | 0.475564  | -2.331301 | 1.999306  |
| H | 1.400955  | -0.120916 | 5.078853  | H | 0.638181  | -3.889507 | 1.215180  |
| H | 1.346153  | 1.456508  | 4.299123  | C | -2.411269 | -3.040106 | 3.554159  |
| H | 5.118733  | 1.827953  | 4.020636  | H | -1.878535 | -1.321486 | 2.376531  |
| H | 3.594431  | 2.626072  | 3.636090  | H | -3.296608 | -2.157742 | 1.798014  |
| H | 3.360734  | 1.323610  | 5.743585  | C | -1.032019 | -3.239027 | 4.191449  |
| H | 3.886624  | -0.144102 | 4.919666  | H | 0.891286  | -4.115185 | 3.660328  |
| C | 3.117203  | 1.179784  | -1.039943 | H | -0.508266 | -5.022585 | 3.089035  |
| C | 2.600507  | 2.600129  | -0.742880 | H | -3.062767 | -2.457763 | 4.216125  |
| C | 4.647871  | 1.205345  | -1.250221 | H | -2.891945 | -4.020276 | 3.411850  |
| H | 2.667004  | 0.865835  | -1.992239 | H | -1.115561 | -3.767331 | 5.149897  |
| C | 2.996038  | 3.592072  | -1.847875 | H | -0.593500 | -2.252640 | 4.405413  |
| H | 3.036033  | 2.947616  | 0.205184  | C | -0.674360 | -3.276792 | -1.729662 |
| H | 1.518280  | 2.588771  | -0.591474 | C | -0.034080 | -2.497703 | -2.898841 |
| C | 5.032558  | 2.197530  | -2.362483 | C | 0.244092  | -4.433075 | -1.291309 |
| H | 5.150008  | 1.499460  | -0.320580 | H | -1.602062 | -3.737165 | -2.098550 |
| H | 5.036312  | 0.218062  | -1.516649 | C | 0.329990  | -3.414960 | -4.075137 |
| C | 4.513139  | 3.610266  | -2.070114 | H | 0.863833  | -1.986049 | -2.533690 |
| H | 2.631410  | 4.593771  | -1.591403 | H | -0.701852 | -1.708379 | -3.248430 |
| H | 2.498122  | 3.312001  | -2.786857 | C | 0.597264  | -5.351101 | -2.474263 |
| H | 6.123078  | 2.204271  | -2.488083 | H | 1.172147  | -4.031737 | -0.866722 |
| H | 4.608526  | 1.846188  | -3.315397 | H | -0.235656 | -5.023601 | -0.502609 |
| H | 4.775620  | 4.292055  | -2.889005 | C | 1.236916  | -4.569939 | -3.631132 |
| H | 5.007430  | 3.996520  | -1.165968 | H | 0.813175  | -2.826900 | -4.866075 |
| P | 2.374135  | -0.078348 | 0.177052  | H | -0.593016 | -3.827162 | -4.509917 |
| C | -1.383639 | -3.064823 | 1.209683  | H | 1.268495  | -6.150343 | -2.133542 |
| C | -0.010487 | -3.303372 | 1.868582  | H | -0.319667 | -5.841435 | -2.833689 |
| C | -2.296094 | -2.316967 | 2.205420  | H | 1.447263  | -5.240876 | -4.473594 |

|    |           |           |           |               |           |           |           |
|----|-----------|-----------|-----------|---------------|-----------|-----------|-----------|
| H  | 2.204674  | -4.165096 | -3.302283 | C             | -0.015738 | 1.229127  | -3.073540 |
| C  | -3.002040 | -1.777157 | -0.869869 | H             | 0.948338  | 1.724626  | -2.915031 |
| C  | -3.142447 | -1.197854 | -2.292983 | H             | -0.021329 | 0.377772  | -2.375620 |
| C  | -3.961293 | -2.979824 | -0.733186 | C             | -4.011453 | 3.281517  | -3.406773 |
| H  | -3.325109 | -1.002560 | -0.163848 | H             | -4.795518 | 3.245899  | -4.174197 |
| C  | -4.582689 | -0.729920 | -2.555352 | H             | -4.458436 | 2.938852  | -2.465865 |
| H  | -2.889809 | -1.971975 | -3.030551 | H             | -3.737206 | 4.335381  | -3.270328 |
| H  | -2.439236 | -0.376364 | -2.448773 | C             | -0.131205 | 4.676761  | -3.901733 |
| C  | -5.414465 | -2.536079 | -0.982746 | H             | -0.962624 | 4.765704  | -4.611138 |
| H  | -3.689865 | -3.754581 | -1.464946 | H             | 0.357636  | 5.657849  | -3.844548 |
| H  | -3.891059 | -3.446284 | 0.253374  | H             | 0.595299  | 3.979419  | -4.338967 |
| C  | -5.580596 | -1.880475 | -2.360942 | C             | -0.090748 | 0.718995  | -4.521945 |
| H  | -4.666952 | -0.320508 | -3.569861 | H             | 0.716053  | 0.007497  | -4.743141 |
| H  | -4.827168 | 0.091194  | -1.865837 | H             | -1.039494 | 0.207891  | -4.723550 |
| H  | -6.091445 | -3.394623 | -0.885017 | H             | -0.011184 | 1.541477  | -5.243354 |
| H  | -5.701089 | -1.817341 | -0.200702 |               |           |           |           |
| H  | -6.609446 | -1.522456 | -2.492957 | <b>TS3A-1</b> |           |           |           |
| H  | -5.407873 | -2.637708 | -3.140451 | C             | 4.804733  | -1.382516 | 2.391268  |
| P  | -1.202232 | -2.051510 | -0.375670 | C             | 3.484815  | -1.528578 | 1.972289  |
| Ni | -0.026978 | -0.071938 | -0.031083 | C             | 3.165548  | -2.273444 | 0.826736  |
| C  | -2.135554 | 1.991690  | -0.850645 | C             | 4.222778  | -2.895953 | 0.146367  |
| H  | -2.812344 | 1.166251  | -1.094949 | C             | 5.543172  | -2.755189 | 0.568687  |
| H  | -2.804246 | 2.825247  | -0.568691 | C             | 5.861465  | -1.982439 | 1.692406  |
| Si | -1.369641 | 2.456177  | -2.521145 | H             | 5.019798  | -0.790710 | 3.278739  |
| C  | -2.792454 | 2.423593  | -3.791525 | H             | 2.694448  | -1.049136 | 2.540132  |
| H  | -2.400839 | 2.750583  | -4.765015 | H             | 4.007020  | -3.496302 | -0.733301 |
| H  | -3.112758 | 1.383628  | -3.939466 | H             | 6.338845  | -3.249983 | 0.015781  |
| C  | -0.611835 | 4.194962  | -2.522264 | C             | 7.294507  | -1.777610 | 2.122454  |
| H  | -1.329894 | 4.912177  | -2.100587 | H             | 7.935896  | -2.602782 | 1.794367  |
| H  | 0.231169  | 4.172115  | -1.826137 | H             | 7.705721  | -0.853983 | 1.692380  |

|    |           |           |           |   |           |          |           |
|----|-----------|-----------|-----------|---|-----------|----------|-----------|
| H  | 7.380498  | -1.693332 | 3.211684  | H | -1.722510 | 5.529081 | -1.617171 |
| C  | 1.766916  | -2.437273 | 0.335960  | H | -2.810828 | 4.906584 | -3.771237 |
| O  | 1.701772  | -1.214471 | -1.019759 | H | -3.072101 | 3.264458 | -3.185233 |
| Si | 2.120693  | -1.529340 | -2.595844 | C | 2.313603  | 1.998348 | -0.691555 |
| C  | 1.000482  | -0.524362 | -3.747524 | C | 2.813035  | 3.374309 | -1.176630 |
| H  | 1.403335  | 0.482009  | -3.907185 | C | 3.257631  | 1.443049 | 0.387804  |
| H  | 0.903505  | -1.001683 | -4.731076 | H | 2.367490  | 1.303194 | -1.539189 |
| H  | 0.000146  | -0.415975 | -3.318262 | C | 4.269219  | 3.282837 | -1.670324 |
| C  | 1.923350  | -3.369343 | -3.028328 | H | 2.751980  | 4.105527 | -0.358721 |
| H  | 2.628284  | -4.010922 | -2.486132 | H | 2.192493  | 3.761396 | -1.991973 |
| H  | 0.913862  | -3.735690 | -2.815006 | C | 4.709287  | 1.354165 | -0.098881 |
| H  | 2.108510  | -3.521154 | -4.099603 | H | 3.228572  | 2.101471 | 1.266132  |
| C  | 3.912661  | -1.057378 | -2.994459 | H | 2.908242  | 0.458375 | 0.696218  |
| H  | 4.196319  | -1.423410 | -3.990329 | C | 5.208465  | 2.716814 | -0.596122 |
| H  | 4.041388  | 0.031368  | -2.994319 | H | 4.611350  | 4.273245 | -1.998555 |
| H  | 4.616133  | -1.475605 | -2.266133 | H | 4.301278  | 2.630508 | -2.556070 |
| C  | -0.318522 | 3.136001  | -1.216188 | H | 5.343435  | 0.977112 | 0.712986  |
| C  | -0.371072 | 2.659259  | -2.681785 | H | 4.772953  | 0.617764 | -0.908126 |
| C  | -1.720761 | 3.550329  | -0.742822 | H | 6.230332  | 2.636304 | -0.989025 |
| H  | 0.313867  | 4.031504  | -1.169437 | H | 5.249954  | 3.419655 | 0.250249  |
| C  | -0.998765 | 3.709818  | -3.610364 | C | 0.299225  | 2.516061 | 1.574814  |
| H  | -0.955356 | 1.730451  | -2.731394 | C | 0.795346  | 1.566521 | 2.686031  |
| H  | 0.632965  | 2.404185  | -3.037121 | C | 0.789979  | 3.949711 | 1.853176  |
| C  | -2.332816 | 4.615131  | -1.667958 | H | -0.799119 | 2.519453 | 1.659702  |
| H  | -2.367158 | 2.668533  | -0.730258 | C | 0.270669  | 2.022441 | 4.054481  |
| H  | -1.692623 | 3.935668  | 0.282540  | H | 1.890099  | 1.558334 | 2.713084  |
| C  | -2.392315 | 4.127416  | -3.121681 | H | 0.485451  | 0.541779 | 2.462883  |
| H  | -1.051307 | 3.317042  | -4.633859 | C | 0.295473  | 4.427483 | 3.231374  |
| H  | -0.347857 | 4.596306  | -3.645900 | H | 1.888007  | 3.967639 | 1.833235  |
| H  | -3.334031 | 4.889535  | -1.311401 | H | 0.451180  | 4.646683 | 1.077716  |



|   |           |           |           |   |           |           |           |
|---|-----------|-----------|-----------|---|-----------|-----------|-----------|
| C | 0.710858  | 3.464529  | 4.355240  | H | -3.336307 | 1.750529  | 0.745280  |
| H | 0.625762  | 1.343778  | 4.841082  | H | -4.291166 | 0.711615  | 1.779015  |
| H | -0.828119 | 1.962395  | 4.059209  | C | -5.212299 | 1.131029  | -2.037999 |
| H | 0.671985  | 5.437809  | 3.437588  | H | -3.055316 | 0.990735  | -1.859067 |
| H | -0.802374 | 4.500230  | 3.205998  | H | -3.838308 | -0.500528 | -2.350325 |
| H | 0.298779  | 3.802053  | 5.314849  | C | -5.458317 | 2.308372  | -1.085686 |
| H | 1.806123  | 3.486419  | 4.457703  | H | -5.607277 | 2.691353  | 1.050887  |
| P | 0.506412  | 1.810150  | -0.156956 | H | -6.341883 | 1.177266  | 0.528273  |
| C | -2.637888 | -2.576661 | -0.921944 | H | -5.150341 | 1.484616  | -3.075553 |
| C | -1.762634 | -2.433736 | -2.184767 | H | -6.070079 | 0.443631  | -1.990527 |
| C | -2.389319 | -3.963594 | -0.294234 | H | -6.401882 | 2.810169  | -1.335301 |
| H | -3.695703 | -2.543783 | -1.223841 | H | -4.663208 | 3.052981  | -1.217734 |
| C | -2.014850 | -3.556556 | -3.201325 | C | -2.704936 | -1.725956 | 1.935483  |
| H | -0.713948 | -2.440673 | -1.865622 | C | -2.165296 | -0.782145 | 3.029498  |
| H | -1.922754 | -1.461073 | -2.661046 | C | -4.151158 | -2.159359 | 2.246327  |
| C | -2.686040 | -5.086265 | -1.303539 | H | -2.077834 | -2.624201 | 1.984853  |
| H | -1.341166 | -4.039885 | 0.021196  | C | -2.262444 | -1.433845 | 4.417320  |
| H | -3.003312 | -4.114117 | 0.598908  | H | -2.726293 | 0.161529  | 3.035249  |
| C | -1.832235 | -4.943369 | -2.570149 | H | -1.128330 | -0.528698 | 2.801178  |
| H | -1.341477 | -3.434454 | -4.059318 | C | -4.234860 | -2.820376 | 3.633384  |
| H | -3.040711 | -3.468788 | -3.589958 | H | -4.816950 | -1.287230 | 2.236108  |
| H | -2.512057 | -6.062320 | -0.832408 | H | -4.528805 | -2.844852 | 1.478136  |
| H | -3.751877 | -5.052937 | -1.575371 | C | -3.696969 | -1.886431 | 4.728473  |
| H | -2.081113 | -5.730310 | -3.293420 | H | -1.905114 | -0.734698 | 5.184545  |
| H | -0.775154 | -5.084821 | -2.302696 | H | -1.592810 | -2.306129 | 4.448801  |
| C | -3.933903 | -0.110315 | -0.206771 | H | -5.271974 | -3.107211 | 3.850695  |
| C | -4.195970 | 1.070215  | 0.750467  | H | -3.645058 | -3.749108 | 3.627078  |
| C | -3.933495 | 0.358166  | -1.677203 | H | -3.739271 | -2.382095 | 5.706668  |
| H | -4.764762 | -0.822347 | -0.089745 | H | -4.347543 | -1.001121 | 4.795202  |
| C | -5.475068 | 1.837378  | 0.373996  | P | -2.352999 | -1.066374 | 0.205003  |

|                |           |           |           |   |           |           |           |
|----------------|-----------|-----------|-----------|---|-----------|-----------|-----------|
| Ni             | -0.083390 | -0.453846 | -0.021533 | H | -2.395517 | 0.494768  | -1.626705 |
| H              | 1.656216  | -3.302258 | -0.313932 | C | -3.461154 | 4.296382  | -1.979972 |
| C              | 0.624801  | -2.128019 | 1.142237  | H | -3.014573 | 3.844681  | 0.087258  |
| H              | -0.131228 | -2.908895 | 1.142083  | H | -1.713707 | 4.683749  | -0.749387 |
| H              | 0.815526  | -1.753471 | 2.147361  | C | -4.511743 | 3.201661  | -2.219211 |
|                |           |           |           | H | -4.600346 | 1.071018  | -2.664443 |
| <b>INT3A-1</b> |           |           |           | H | -3.286463 | 1.922176  | -3.467547 |
| C              | -1.013792 | 2.460198  | 1.729352  | H | -3.947380 | 5.247927  | -1.728805 |
| C              | -2.326394 | 1.758696  | 2.129045  | H | -2.899615 | 4.464815  | -2.911037 |
| C              | 0.099130  | 2.084063  | 2.727643  | H | -5.182829 | 3.492489  | -3.037209 |
| H              | -1.174635 | 3.546865  | 1.758206  | H | -5.136765 | 3.097989  | -1.319353 |
| C              | -2.720242 | 2.058308  | 3.583794  | C | 0.999357  | 3.105160  | -0.361817 |
| H              | -2.201561 | 0.677493  | 2.001488  | C | 1.233164  | 3.255308  | -1.880228 |
| H              | -3.140926 | 2.057966  | 1.462670  | C | 1.056681  | 4.497112  | 0.300941  |
| C              | -0.289971 | 2.382864  | 4.181980  | H | 1.841488  | 2.520766  | 0.031061  |
| H              | 0.302919  | 1.012399  | 2.611125  | C | 2.600560  | 3.895416  | -2.161750 |
| H              | 1.033768  | 2.601844  | 2.485451  | H | 0.451326  | 3.900723  | -2.304465 |
| C              | -1.600131 | 1.681717  | 4.562628  | H | 1.148741  | 2.289016  | -2.386445 |
| H              | -3.642314 | 1.516152  | 3.831157  | C | 2.422167  | 5.156298  | 0.032154  |
| H              | -2.947585 | 3.129931  | 3.686453  | H | 0.259928  | 5.135667  | -0.103073 |
| H              | 0.522029  | 2.071684  | 4.852655  | H | 0.891216  | 4.434572  | 1.380820  |
| H              | -0.405848 | 3.469376  | 4.310265  | C | 2.719915  | 5.262045  | -1.471093 |
| H              | -1.887471 | 1.934682  | 5.590920  | H | 2.749751  | 3.999114  | -3.244039 |
| H              | -1.448066 | 0.593529  | 4.533393  | H | 3.393220  | 3.227145  | -1.796182 |
| C              | -1.813978 | 2.544201  | -1.172311 | H | 2.456849  | 6.149000  | 0.498986  |
| C              | -2.877934 | 1.449746  | -1.398114 | H | 3.205807  | 4.553382  | 0.515598  |
| C              | -2.473187 | 3.902312  | -0.866801 | H | 3.717731  | 5.689093  | -1.632575 |
| H              | -1.276879 | 2.644894  | -2.125074 | H | 2.001215  | 5.957296  | -1.929772 |
| C              | -3.843517 | 1.852717  | -2.521388 | P | -0.464570 | 1.968650  | 0.003148  |
| H              | -3.445829 | 1.290628  | -0.475081 | C | 1.644588  | -2.955728 | 0.792719  |

|   |           |           |           |    |           |           |           |
|---|-----------|-----------|-----------|----|-----------|-----------|-----------|
| C | 0.336932  | -3.090431 | 1.606608  | H  | 4.327157  | -1.098495 | 4.367221  |
| C | 1.547518  | -3.862984 | -0.451373 | H  | 4.491780  | 1.292934  | 5.040860  |
| H | 2.485799  | -3.308501 | 1.409847  | H  | 2.927591  | 1.629630  | 4.298146  |
| C | 0.104601  | -4.545964 | 2.038323  | C  | 3.086890  | -1.188426 | -1.092484 |
| H | -0.490491 | -2.745038 | 0.972890  | C  | 3.176587  | 0.163208  | -1.824519 |
| H | 0.344762  | -2.438645 | 2.485766  | C  | 4.485066  | -1.798585 | -0.896819 |
| C | 1.295765  | -5.326368 | -0.049548 | H  | 2.514437  | -1.844670 | -1.760075 |
| H | 0.732531  | -3.495638 | -1.086013 | C  | 3.890888  | 0.007483  | -3.175204 |
| H | 2.466644  | -3.820251 | -1.044722 | H  | 3.720727  | 0.897058  | -1.216625 |
| C | 0.041375  | -5.477246 | 0.820750  | H  | 2.166901  | 0.557187  | -1.966121 |
| H | -0.816337 | -4.621950 | 2.629316  | C  | 5.200336  | -1.958371 | -2.249831 |
| H | 0.926258  | -4.861424 | 2.699691  | H  | 5.086783  | -1.140438 | -0.253881 |
| H | 1.208896  | -5.943662 | -0.953095 | H  | 4.422125  | -2.766937 | -0.384914 |
| H | 2.169301  | -5.701738 | 0.505619  | C  | 5.282278  | -0.620191 | -3.000596 |
| H | -0.081061 | -6.520694 | 1.138855  | H  | 3.968463  | 0.983201  | -3.672403 |
| H | -0.840685 | -5.219496 | 0.221139  | H  | 3.281629  | -0.632797 | -3.829554 |
| C | 3.118216  | -0.663201 | 1.832697  | H  | 6.205050  | -2.373530 | -2.098345 |
| C | 3.585579  | 0.800682  | 1.706583  | H  | 4.646905  | -2.684721 | -2.862973 |
| C | 2.498067  | -0.929754 | 3.221984  | H  | 5.764592  | -0.760159 | -3.976139 |
| H | 3.999473  | -1.314397 | 1.741222  | H  | 5.919454  | 0.072191  | -2.429668 |
| C | 4.497637  | 1.232596  | 2.865131  | P  | 1.961803  | -1.133689 | 0.413868  |
| H | 2.705174  | 1.452780  | 1.683653  | Ni | -0.000066 | -0.215352 | -0.405820 |
| H | 4.110078  | 0.949673  | 0.757586  | Si | -0.695304 | -1.523892 | -3.249076 |
| C | 3.419933  | -0.476124 | 4.366227  | C  | -2.469545 | -1.803289 | -3.864791 |
| H | 1.538427  | -0.404882 | 3.306392  | H  | -2.870115 | -2.758496 | -3.507555 |
| H | 2.282676  | -1.996302 | 3.340557  | H  | -2.528297 | -1.800791 | -4.961088 |
| C | 3.824088  | 0.996150  | 4.222323  | C  | -0.113387 | 0.116118  | -4.022145 |
| H | 4.769450  | 2.289544  | 2.745812  | H  | 0.954313  | 0.289558  | -3.844359 |
| H | 5.435142  | 0.658633  | 2.822875  | H  | -0.663840 | 0.955069  | -3.578485 |
| H | 2.920576  | -0.647739 | 5.328396  | C  | 0.407936  | -2.905781 | -3.945656 |

|    |           |           |           |               |           |           |           |
|----|-----------|-----------|-----------|---------------|-----------|-----------|-----------|
| H  | 0.113565  | -3.883295 | -3.543194 | <b>3a</b>     |           |           |           |
| H  | 1.460317  | -2.744596 | -3.677468 | C             | 0.945233  | -1.190652 | -0.009594 |
| O  | -0.653004 | -1.495843 | -1.619060 | C             | -0.436461 | -1.047510 | -0.005307 |
| H  | -0.278600 | 0.142682  | -5.107312 | C             | -1.034045 | 0.227188  | -0.000665 |
| H  | -3.130103 | -1.009159 | -3.493307 | C             | -0.180285 | 1.341492  | -0.001956 |
| H  | 0.348668  | -2.961698 | -5.040487 | C             | 1.206161  | 1.194184  | -0.006099 |
| Si | -3.762210 | -1.755983 | 0.841608  | C             | 1.796204  | -0.073481 | -0.007685 |
| H  | -2.566450 | -0.959188 | 0.461468  | H             | 1.378007  | -2.189019 | -0.016097 |
| C  | -3.304736 | -2.766349 | 2.384892  | H             | -1.059758 | -1.937040 | -0.009128 |
| H  | -2.626597 | -3.573228 | 2.083442  | H             | -0.610853 | 2.340588  | -0.002402 |
| H  | -4.210662 | -3.259869 | 2.765989  | H             | 1.838469  | 2.079280  | -0.008913 |
| C  | -2.651411 | -1.934748 | 3.502846  | C             | 3.296018  | -0.246703 | 0.012486  |
| H  | -2.397586 | -2.548005 | 4.377200  | H             | 3.812248  | 0.685356  | -0.239461 |
| H  | -1.725250 | -1.466155 | 3.150611  | H             | 3.645787  | -0.559649 | 1.005314  |
| H  | -3.312561 | -1.130124 | 3.848980  | H             | 3.619816  | -1.015533 | -0.698905 |
| C  | -5.212024 | -0.602150 | 1.298341  | C             | -2.489964 | 0.437976  | 0.002147  |
| H  | -4.818026 | 0.257796  | 1.857666  | C             | -3.451147 | -0.494721 | 0.008050  |
| H  | -5.847464 | -1.149285 | 2.010452  | H             | -4.500253 | -0.215090 | 0.010118  |
| C  | -6.077791 | -0.109532 | 0.124437  | H             | -3.238922 | -1.560590 | 0.011313  |
| H  | -6.526362 | -0.949185 | -0.419275 | H             | -2.794821 | 1.485052  | -0.000105 |
| H  | -6.896881 | 0.535474  | 0.467595  |               |           |           |           |
| H  | -5.491491 | 0.465518  | -0.599448 | <b>TS4A-1</b> |           |           |           |
| C  | -4.216423 | -2.881007 | -0.612994 | C             | -2.718998 | 0.175933  | 1.894892  |
| H  | -5.183091 | -3.368508 | -0.419262 | C             | -2.737675 | -1.250851 | 2.475017  |
| H  | -4.368336 | -2.240752 | -1.492450 | C             | -1.802065 | 1.058769  | 2.763420  |
| C  | -3.135255 | -3.932251 | -0.923417 | H             | -3.740729 | 0.577516  | 1.925596  |
| H  | -3.026904 | -4.644263 | -0.096380 | C             | -3.153778 | -1.264145 | 3.955126  |
| H  | -3.383530 | -4.514825 | -1.820176 | H             | -1.735072 | -1.679100 | 2.372692  |
| H  | -2.165847 | -3.449556 | -1.091999 | H             | -3.420077 | -1.889940 | 1.908485  |
|    |           |           |           | C             | -2.217864 | 1.057813  | 4.241768  |

|   |           |           |           |   |           |           |           |
|---|-----------|-----------|-----------|---|-----------|-----------|-----------|
| H | -0.779217 | 0.671810  | 2.667910  | C | -2.871396 | 3.526797  | -2.463942 |
| H | -1.783297 | 2.088000  | 2.392771  | H | -3.768519 | 1.584337  | -2.226561 |
| C | -2.249336 | -0.366246 | 4.808460  | H | -2.038552 | 1.525396  | -2.538664 |
| H | -3.130818 | -2.295706 | 4.328822  | C | -3.731661 | 4.218810  | -0.188469 |
| H | -4.195323 | -0.919238 | 4.043221  | H | -4.647542 | 2.281427  | 0.108193  |
| H | -1.527894 | 1.686406  | 4.819994  | H | -3.511952 | 2.736652  | 1.366705  |
| H | -3.214844 | 1.514135  | 4.336466  | C | -3.946284 | 4.316410  | -1.704790 |
| H | -2.589842 | -0.357531 | 5.851595  | H | -3.064467 | 3.555262  | -3.544042 |
| H | -1.230259 | -0.776048 | 4.807314  | H | -1.892297 | 4.002199  | -2.307620 |
| C | -3.362506 | -0.837617 | -0.855762 | H | -4.528152 | 4.752016  | 0.346223  |
| C | -2.990411 | -2.330822 | -0.858810 | H | -2.786519 | 4.716654  | 0.077593  |
| C | -4.852748 | -0.652573 | -0.508733 | H | -3.950370 | 5.365909  | -2.025068 |
| H | -3.218179 | -0.491417 | -1.887579 | H | -4.936215 | 3.905887  | -1.953609 |
| C | -3.865332 | -3.109744 | -1.851178 | P | -2.130443 | 0.215281  | 0.105180  |
| H | -3.142599 | -2.758606 | 0.136277  | C | 3.695601  | 0.660323  | 0.383498  |
| H | -1.927604 | -2.447036 | -1.076655 | C | 3.669631  | -0.601025 | 1.263542  |
| C | -5.743483 | -1.451598 | -1.477680 | C | 4.617978  | 0.409696  | -0.826852 |
| H | -5.036054 | -0.996916 | 0.518012  | H | 4.144559  | 1.482882  | 0.960416  |
| H | -5.136165 | 0.404306  | -0.540929 | C | 5.074434  | -0.990768 | 1.744070  |
| C | -5.355135 | -2.936941 | -1.520140 | H | 3.243973  | -1.414386 | 0.669117  |
| H | -3.588754 | -4.170900 | -1.836747 | H | 2.995452  | -0.477260 | 2.116099  |
| H | -3.678352 | -2.745928 | -2.872605 | C | 6.038312  | 0.050980  | -0.353479 |
| H | -6.797909 | -1.338409 | -1.193865 | H | 4.218767  | -0.413998 | -1.430895 |
| H | -5.642038 | -1.023743 | -2.486520 | H | 4.674947  | 1.286666  | -1.479973 |
| H | -5.977990 | -3.470803 | -2.249067 | C | 6.041076  | -1.177458 | 0.565585  |
| H | -5.558685 | -3.391100 | -0.538800 | H | 5.019784  | -1.908859 | 2.342558  |
| C | -2.562600 | 1.985235  | -0.462046 | H | 5.458750  | -0.203610 | 2.410823  |
| C | -2.812241 | 2.067192  | -1.984615 | H | 6.684499  | -0.121558 | -1.223865 |
| C | -3.673717 | 2.755117  | 0.284976  | H | 6.460501  | 0.912387  | 0.185993  |
| H | -1.627257 | 2.521738  | -0.273027 | H | 7.056467  | -1.377376 | 0.930940  |

|   |           |           |           |    |           |           |           |
|---|-----------|-----------|-----------|----|-----------|-----------|-----------|
| H | 5.734730  | -2.057720 | -0.014505 | H  | 1.407950  | 1.972678  | -4.379249 |
| C | 1.816172  | 2.629428  | 1.258525  | H  | 3.559882  | 4.861401  | -3.112027 |
| C | 0.538389  | 3.467713  | 1.091425  | H  | 3.649515  | 3.189503  | -3.663859 |
| C | 1.943286  | 2.121572  | 2.711272  | H  | 1.815116  | 4.381712  | -4.856859 |
| H | 2.682195  | 3.275800  | 1.054403  | H  | 1.082448  | 4.833364  | -3.318524 |
| C | 0.454464  | 4.613997  | 2.110789  | P  | 1.912228  | 1.204669  | 0.019950  |
| H | -0.323477 | 2.808629  | 1.219699  | Ni | 0.155619  | -0.370402 | 0.041459  |
| H | 0.471630  | 3.874206  | 0.077214  | Si | 0.702232  | -2.368503 | -2.571755 |
| C | 1.850340  | 3.270351  | 3.728743  | C  | 0.605030  | -4.111228 | -3.300257 |
| H | 1.152803  | 1.386655  | 2.909852  | H  | 1.501845  | -4.704846 | -3.094053 |
| H | 2.894408  | 1.598872  | 2.854513  | H  | 0.507568  | -4.029044 | -4.391350 |
| C | 0.567775  | 4.093139  | 3.549479  | C  | -0.706194 | -1.352349 | -3.334998 |
| H | -0.487588 | 5.161016  | 1.971993  | H  | -0.956774 | -0.510356 | -2.681964 |
| H | 1.266355  | 5.331160  | 1.918644  | H  | -1.614618 | -1.949993 | -3.464709 |
| H | 1.907381  | 2.864978  | 4.746878  | C  | 2.319138  | -1.599910 | -3.181921 |
| H | 2.721376  | 3.930937  | 3.603446  | H  | 3.200488  | -2.108527 | -2.777958 |
| H | 0.544774  | 4.927290  | 4.261930  | H  | 2.381506  | -0.542352 | -2.908178 |
| H | -0.302255 | 3.460772  | 3.774707  | O  | 0.554348  | -2.278437 | -0.919383 |
| C | 2.067160  | 2.074273  | -1.644663 | H  | -0.423356 | -0.949243 | -4.315352 |
| C | 0.708339  | 2.220341  | -2.350817 | H  | -0.259988 | -4.671791 | -2.931596 |
| C | 2.842839  | 3.404886  | -1.666332 | H  | 2.371549  | -1.661554 | -4.276904 |
| H | 2.643839  | 1.355464  | -2.240035 | Si | 0.875915  | -3.099483 | 0.761533  |
| C | 0.876974  | 2.733081  | -3.787930 | H  | 0.442459  | -1.561593 | 1.200625  |
| H | 0.069332  | 2.915229  | -1.794107 | C  | 1.700707  | -3.128514 | 2.552194  |
| H | 0.192396  | 1.255588  | -2.344316 | H  | 2.750976  | -2.813931 | 2.508111  |
| C | 3.022912  | 3.904261  | -3.110062 | H  | 1.729323  | -4.188669 | 2.848493  |
| H | 2.293388  | 4.166177  | -1.097849 | C  | 0.972682  | -2.315682 | 3.625383  |
| H | 3.818818  | 3.296111  | -1.178327 | H  | 1.472250  | -2.351773 | 4.604082  |
| C | 1.668783  | 4.049447  | -3.821535 | H  | 0.893520  | -1.259625 | 3.331412  |
| H | -0.107791 | 2.865437  | -4.254474 | H  | -0.053397 | -2.679640 | 3.770328  |

|                         |           |           |           |               |           |           |           |
|-------------------------|-----------|-----------|-----------|---------------|-----------|-----------|-----------|
| C                       | -0.713117 | -4.125830 | 1.056782  | H             | -0.673123 | -1.946944 | 2.478144  |
| H                       | -1.547635 | -3.457415 | 1.278880  | C             | -1.277901 | 1.078188  | 1.675595  |
| H                       | -0.537498 | -4.693720 | 1.981807  | C             | -0.833720 | 2.534854  | 1.450206  |
| C                       | -1.121419 | -5.102230 | -0.055699 | H             | -0.632066 | 0.607912  | 2.430113  |
| H                       | -0.342308 | -5.850416 | -0.240559 | H             | -2.292882 | 1.059134  | 2.098995  |
| H                       | -2.043918 | -5.644245 | 0.194597  | H             | -0.838662 | 3.111330  | 2.383472  |
| H                       | -1.296009 | -4.581248 | -1.000954 | H             | 0.181567  | 2.584224  | 1.038752  |
| C                       | 2.122293  | -4.373535 | -0.007808 | H             | -1.493914 | 3.050710  | 0.742931  |
| H                       | 2.113096  | -5.223637 | 0.691450  | O             | 0.270154  | 0.011206  | -0.540558 |
| H                       | 1.711162  | -4.760766 | -0.945379 | Si            | 1.913378  | 0.004300  | -0.301814 |
| C                       | 3.580944  | -3.952262 | -0.233367 | C             | 2.609622  | -1.569163 | -1.067597 |
| H                       | 4.063871  | -3.660015 | 0.706030  | H             | 2.367958  | -1.625018 | -2.135496 |
| H                       | 4.184703  | -4.761195 | -0.667889 | H             | 3.701018  | -1.615693 | -0.966426 |
| H                       | 3.653080  | -3.095891 | -0.913842 | H             | 2.190452  | -2.460423 | -0.585302 |
|                         |           |           |           | C             | 2.627228  | 1.525689  | -1.151487 |
| Et <sub>3</sub> Si-OTMS |           |           |           | H             | 2.221880  | 2.445022  | -0.711747 |
| Si                      | -1.256119 | -0.001762 | 0.120183  | H             | 3.719733  | 1.563369  | -1.058963 |
| C                       | -2.432675 | 0.685373  | -1.187913 | H             | 2.379395  | 1.530896  | -2.219382 |
| C                       | -2.375445 | -0.054167 | -2.536758 | C             | 2.301670  | 0.054621  | 1.544734  |
| H                       | -2.193504 | 1.747334  | -1.339120 | H             | 3.384350  | 0.025362  | 1.720009  |
| H                       | -3.456820 | 0.662672  | -0.786995 | H             | 1.914430  | 0.969637  | 2.008235  |
| H                       | -3.048043 | 0.397060  | -3.276673 | H             | 1.856515  | -0.799390 | 2.068513  |
| H                       | -1.361170 | -0.034503 | -2.950911 |               |           |           |           |
| H                       | -2.665605 | -1.106621 | -2.430767 | <b>TS5A-1</b> |           |           |           |
| C                       | -1.727528 | -1.781336 | 0.559232  | C             | -4.804129 | 2.676111  | 0.790064  |
| C                       | -0.762977 | -2.488553 | 1.528361  | C             | -3.472486 | 2.403508  | 1.112307  |
| H                       | -1.798141 | -2.357265 | -0.373964 | C             | -2.429865 | 2.750956  | 0.244203  |
| H                       | -2.742537 | -1.773280 | 0.983532  | C             | -2.776475 | 3.407621  | -0.949506 |
| H                       | -1.096618 | -3.506657 | 1.764003  | C             | -4.099624 | 3.700386  | -1.259404 |
| H                       | 0.243285  | -2.567077 | 1.100101  | C             | -5.144960 | 3.328193  | -0.399245 |

|   |           |           |           |   |          |           |           |
|---|-----------|-----------|-----------|---|----------|-----------|-----------|
| H | -5.589326 | 2.388181  | 1.486365  | C | 2.970533 | 4.781999  | -0.584153 |
| H | -3.243911 | 1.946054  | 2.068144  | H | 2.090006 | 3.492179  | 0.919922  |
| H | -1.984787 | 3.683233  | -1.643290 | H | 1.357908 | 3.332143  | -0.671813 |
| H | -4.331839 | 4.213481  | -2.190476 | C | 5.255066 | 3.746406  | -0.309560 |
| C | -6.584859 | 3.588457  | -0.772690 | H | 4.542543 | 2.431496  | 1.240347  |
| H | -6.950088 | 2.834843  | -1.484280 | H | 5.262169 | 1.587557  | -0.125708 |
| H | -7.241232 | 3.556141  | 0.103573  | C | 4.364967 | 4.948601  | 0.033228  |
| H | -6.706277 | 4.567463  | -1.250823 | H | 2.323862 | 5.625527  | -0.310217 |
| C | -0.989806 | 2.544721  | 0.573527  | H | 3.060462 | 4.797633  | -1.681000 |
| C | 3.265108  | -0.083927 | 1.386749  | H | 6.244435 | 3.854129  | 0.153840  |
| C | 2.797631  | 0.633069  | 2.671909  | H | 5.418255 | 3.714971  | -1.397351 |
| C | 3.075357  | -1.603334 | 1.543745  | H | 4.830022 | 5.881157  | -0.310814 |
| H | 4.335759  | 0.107464  | 1.244607  | H | 4.270152 | 5.026438  | 1.126762  |
| C | 3.519805  | 0.103954  | 3.919539  | C | 2.846531 | -0.455304 | -1.533850 |
| H | 1.716850  | 0.475623  | 2.776569  | C | 2.139808 | 0.018548  | -2.822199 |
| H | 2.940387  | 1.717517  | 2.585946  | C | 4.360196 | -0.606211 | -1.770956 |
| C | 3.791279  | -2.142129 | 2.792834  | H | 2.438372 | -1.446212 | -1.291716 |
| H | 2.004159  | -1.812477 | 1.626437  | C | 2.430610 | -0.925016 | -4.000207 |
| H | 3.435606  | -2.136618 | 0.655946  | H | 2.490200 | 1.026878  | -3.086400 |
| C | 3.331758  | -1.412625 | 4.063014  | H | 1.061985 | 0.108251  | -2.640064 |
| H | 3.147937  | 0.622030  | 4.812879  | C | 4.643131 | -1.561992 | -2.943160 |
| H | 4.593872  | 0.331816  | 3.846317  | H | 4.793093 | 0.376279  | -2.003225 |
| H | 3.612342  | -3.221481 | 2.884322  | H | 4.863970 | -0.966710 | -0.865670 |
| H | 4.877164  | -2.011853 | 2.672889  | C | 3.940419 | -1.094803 | -4.226248 |
| H | 3.876428  | -1.788152 | 4.938584  | H | 1.946722 | -0.547315 | -4.910062 |
| H | 2.266436  | -1.627325 | 4.235703  | H | 1.986818 | -1.909064 | -3.794550 |
| C | 3.205375  | 2.244928  | -0.466202 | H | 5.725224 | -1.646112 | -3.107412 |
| C | 2.313042  | 3.460462  | -0.156435 | H | 4.285392 | -2.568900 | -2.679513 |
| C | 4.610289  | 2.425304  | 0.144497  | H | 4.127407 | -1.803061 | -5.043458 |
| H | 3.332629  | 2.221091  | -1.557879 | H | 4.369438 | -0.131180 | -4.539571 |



|   |           |           |           |    |           |           |           |
|---|-----------|-----------|-----------|----|-----------|-----------|-----------|
| P | 2.307250  | 0.609179  | -0.079942 | H  | -0.891761 | -4.678889 | -2.939420 |
| C | -1.878171 | -1.870386 | 1.808023  | H  | 1.681396  | -5.193014 | -0.209612 |
| C | -0.689939 | -1.731713 | 2.788166  | H  | 0.017733  | -5.553790 | -0.668992 |
| C | -3.115017 | -1.167617 | 2.405547  | H  | 1.453786  | -5.465434 | -2.705083 |
| H | -2.119519 | -2.938746 | 1.696558  | H  | 1.981824  | -3.837154 | -2.280767 |
| C | -1.023844 | -2.246591 | 4.196095  | C  | -3.036653 | -0.843611 | -0.726282 |
| H | -0.405180 | -0.673347 | 2.835581  | C  | -2.915494 | -0.032380 | -2.034694 |
| H | 0.188225  | -2.260696 | 2.410657  | C  | -3.975053 | -2.051363 | -0.925415 |
| C | -3.447913 | -1.685480 | 3.814846  | H  | -3.505148 | -0.161724 | -0.004674 |
| H | -2.923500 | -0.089717 | 2.455615  | C  | -4.303102 | 0.408777  | -2.526929 |
| H | -3.991331 | -1.298041 | 1.764175  | H  | -2.438287 | -0.634213 | -2.817252 |
| C | -2.257108 | -1.539767 | 4.769944  | H  | -2.269662 | 0.833824  | -1.867070 |
| H | -0.156492 | -2.106053 | 4.854938  | C  | -5.362602 | -1.594912 | -1.406198 |
| H | -1.213903 | -3.329761 | 4.152909  | H  | -3.550400 | -2.726628 | -1.680836 |
| H | -4.323189 | -1.150172 | 4.205259  | H  | -4.069289 | -2.638496 | -0.003189 |
| H | -3.731242 | -2.746809 | 3.750005  | C  | -5.253830 | -0.783705 | -2.705223 |
| H | -2.507115 | -1.939795 | 5.760860  | H  | -4.203597 | 0.965463  | -3.467951 |
| H | -2.030707 | -0.471755 | 4.905980  | H  | -4.731063 | 1.104544  | -1.796335 |
| C | -0.873816 | -2.855778 | -0.742280 | H  | -6.016673 | -2.465356 | -1.548199 |
| C | -0.575430 | -2.655111 | -2.241197 | H  | -5.826943 | -0.971991 | -0.627127 |
| C | 0.335298  | -3.503754 | -0.042855 | H  | -6.246331 | -0.438223 | -3.023045 |
| H | -1.726117 | -3.542880 | -0.643238 | H  | -4.876649 | -1.438768 | -3.505456 |
| C | -0.079166 | -3.937219 | -2.929915 | P  | -1.377887 | -1.223659 | 0.086670  |
| H | 0.179796  | -1.867932 | -2.345369 | Ni | 0.047234  | 0.580331  | 0.211679  |
| H | -1.466526 | -2.298492 | -2.763317 | C  | -0.514513 | 1.898451  | 1.744013  |
| C | 0.807160  | -4.790530 | -0.737896 | H  | 0.368620  | 2.304720  | 2.228340  |
| H | 1.160125  | -2.783423 | -0.033427 | H  | -1.217821 | 1.418307  | 2.417769  |
| H | 0.098986  | -3.730051 | 1.001525  | H  | -0.378323 | 3.363617  | 0.210189  |
| C | 1.135574  | -4.537437 | -2.213322 | H  | -0.527019 | 1.678679  | -0.819962 |
| H | 0.159243  | -3.719490 | -3.979196 |    |           |           |           |

|                |           |           |           |   |          |           |           |
|----------------|-----------|-----------|-----------|---|----------|-----------|-----------|
| <b>INT5A-1</b> |           |           |           | H | 5.055245 | 3.903644  | -2.279605 |
| C              | -4.805701 | -3.003234 | -0.891857 | H | 3.321469 | 3.624443  | -2.139616 |
| C              | -3.486891 | -3.310565 | -0.557898 | C | 3.034590 | -2.254236 | -0.527089 |
| C              | -2.905703 | -2.836825 | 0.629078  | C | 2.413622 | -2.666505 | -1.881981 |
| C              | -3.712026 | -2.062451 | 1.470677  | C | 4.567649 | -2.397335 | -0.606349 |
| C              | -5.029324 | -1.743752 | 1.134972  | H | 2.668912 | -2.973471 | 0.219443  |
| C              | -5.599318 | -2.202122 | -0.058053 | C | 2.782949 | -4.116086 | -2.230199 |
| H              | -5.227027 | -3.386876 | -1.819121 | H | 2.791480 | -2.006135 | -2.674447 |
| H              | -2.895443 | -3.930676 | -1.227328 | H | 1.329832 | -2.535213 | -1.853470 |
| H              | -3.297615 | -1.709369 | 2.410855  | C | 4.958030 | -3.845837 | -0.952119 |
| H              | -5.622434 | -1.131918 | 1.812860  | H | 4.959270 | -1.730329 | -1.387224 |
| C              | -7.008825 | -1.819890 | -0.445360 | H | 5.047992 | -2.097509 | 0.329319  |
| H              | -7.659252 | -1.736132 | 0.432796  | C | 4.306681 | -4.310390 | -2.263513 |
| H              | -7.030701 | -0.848011 | -0.957659 | H | 2.341891 | -4.395827 | -3.195633 |
| H              | -7.453014 | -2.554790 | -1.125773 | H | 2.342613 | -4.785661 | -1.476817 |
| C              | 3.568238  | 0.642781  | -0.532424 | H | 6.050556 | -3.934055 | -1.016642 |
| C              | 3.445644  | 0.809555  | -2.062116 | H | 4.636538 | -4.506602 | -0.133281 |
| C              | 3.430043  | 2.008314  | 0.164126  | H | 4.558066 | -5.360168 | -2.462220 |
| H              | 4.573177  | 0.256779  | -0.314186 | H | 4.723438 | -3.723445 | -3.095955 |
| C              | 4.445450  | 1.840408  | -2.610472 | C | 2.619078 | -0.613085 | 1.958528  |
| H              | 2.419968  | 1.119027  | -2.307192 | C | 1.739977 | -1.659593 | 2.676929  |
| H              | 3.604429  | -0.149200 | -2.565159 | C | 4.065239 | -0.704202 | 2.484680  |
| C              | 4.437808  | 3.031990  | -0.383822 | H | 2.221448 | 0.373919  | 2.241947  |
| H              | 2.413941  | 2.383467  | 0.006560  | C | 1.774680 | -1.456831 | 4.199471  |
| H              | 3.562598  | 1.909860  | 1.247451  | H | 2.101756 | -2.669692 | 2.436551  |
| C              | 4.305870  | 3.195204  | -1.904314 | H | 0.711749 | -1.607924 | 2.306948  |
| H              | 4.305413  | 1.955271  | -3.693059 | C | 4.104405 | -0.475108 | 4.006103  |
| H              | 5.467657  | 1.460789  | -2.463681 | H | 4.465342 | -1.703626 | 2.270870  |
| H              | 4.300051  | 3.997423  | 0.120569  | H | 4.723532 | 0.014043  | 1.982377  |
| H              | 5.457761  | 2.696924  | -0.143666 | C | 3.210380 | -1.482386 | 4.744640  |

|   |           |           |           |    |           |           |           |
|---|-----------|-----------|-----------|----|-----------|-----------|-----------|
| H | 1.165101  | -2.224907 | 4.692597  | H  | -0.690078 | 3.577656  | 1.681089  |
| H | 1.312433  | -0.486889 | 4.438469  | C  | 0.515826  | 4.832393  | -1.861489 |
| H | 5.137884  | -0.542129 | 4.370137  | H  | 1.016272  | 2.732400  | -1.666710 |
| H | 3.758984  | 0.546870  | 4.223335  | H  | -0.435177 | 3.043609  | -2.603306 |
| H | 3.215678  | -1.279214 | 5.823220  | C  | 1.217096  | 5.370172  | -0.607899 |
| H | 3.626534  | -2.492353 | 4.612521  | H  | 0.867051  | 5.505140  | 1.535528  |
| P | 2.317854  | -0.623328 | 0.094899  | H  | -0.570047 | 5.750019  | 0.545198  |
| C | -2.275153 | 1.066675  | -1.819813 | H  | 1.160721  | 4.949008  | -2.742273 |
| C | -1.430169 | 0.375003  | -2.918677 | H  | -0.387308 | 5.430890  | -2.052571 |
| C | -3.555759 | 0.248236  | -1.567713 | H  | 1.450657  | 6.435506  | -0.729276 |
| H | -2.565978 | 2.067395  | -2.173938 | H  | 2.176004  | 4.851862  | -0.474493 |
| C | -2.230144 | 0.158770  | -4.211251 | C  | -2.393522 | 1.270752  | 1.182027  |
| H | -1.097408 | -0.599896 | -2.532806 | C  | -1.639776 | 1.007416  | 2.507436  |
| H | -0.518346 | 0.945158  | -3.130056 | C  | -3.361889 | 2.463472  | 1.296368  |
| C | -4.354267 | 0.019911  | -2.860438 | H  | -2.992426 | 0.372679  | 0.995605  |
| H | -3.282601 | -0.722695 | -1.141432 | C  | -2.602616 | 0.888344  | 3.700675  |
| H | -4.199938 | 0.744104  | -0.835169 | H  | -0.923453 | 1.812601  | 2.711543  |
| C | -3.501197 | -0.656369 | -3.940207 | H  | -1.048616 | 0.088568  | 2.402393  |
| H | -1.600296 | -0.344559 | -4.956260 | C  | -4.327870 | 2.275437  | 2.477789  |
| H | -2.506974 | 1.134611  | -4.638984 | H  | -2.804917 | 3.396400  | 1.451189  |
| H | -5.236871 | -0.590273 | -2.634480 | H  | -3.923634 | 2.588923  | 0.362406  |
| H | -4.721138 | 0.986008  | -3.239799 | C  | -3.554893 | 2.089444  | 3.791689  |
| H | -4.080449 | -0.787832 | -4.863233 | H  | -2.028093 | 0.780054  | 4.629717  |
| H | -3.218532 | -1.660545 | -3.592250 | H  | -3.201966 | -0.025356 | 3.595528  |
| C | -0.733749 | 3.108034  | -0.445118 | H  | -5.005892 | 3.135729  | 2.548995  |
| C | -0.037238 | 3.672027  | 0.809513  | H  | -4.954961 | 1.390346  | 2.294715  |
| C | 0.114840  | 3.355595  | -1.709145 | H  | -4.249968 | 1.960932  | 4.631097  |
| H | -1.683318 | 3.649188  | -0.572739 | H  | -2.974523 | 3.001376  | 3.998853  |
| C | 0.348148  | 5.150316  | 0.635770  | P  | -1.201293 | 1.284156  | -0.274195 |
| H | 0.858710  | 3.079734  | 1.032792  | Ni | 0.019936  | -0.694902 | -0.107338 |

|               |           |           |           |   |           |           |           |
|---------------|-----------|-----------|-----------|---|-----------|-----------|-----------|
| C             | -0.415381 | -2.675561 | -0.017859 | C | -3.755038 | 3.397659  | 1.116503  |
| H             | 0.498761  | -3.253708 | 0.186280  | H | -1.912195 | 2.611691  | 0.302142  |
| H             | -0.728751 | -3.000800 | -1.026684 | H | -3.287461 | 2.409762  | -0.759414 |
| C             | -1.478245 | -3.180516 | 0.991197  | C | -3.322908 | 3.367927  | 2.589134  |
| H             | -1.267006 | -2.784732 | 1.994764  | H | -3.086290 | 1.930294  | 4.205331  |
| H             | -1.422909 | -4.279227 | 1.089599  | H | -4.510401 | 1.667389  | 3.200507  |
|               |           |           |           | H | -3.607004 | 4.399941  | 0.694089  |
|               |           |           |           | H | -4.832121 | 3.183332  | 1.047517  |
| <b>TS5A-2</b> |           |           |           | H | -3.917443 | 4.077076  | 3.178985  |
| C             | 4.010686  | -2.750343 | -1.253091 | H | -2.276207 | 3.697457  | 2.662401  |
| C             | 2.872828  | -2.167875 | -1.803556 | C | -2.577243 | -1.980079 | 0.489406  |
| C             | 1.578425  | -2.527392 | -1.373146 | C | -1.484613 | -2.366838 | 1.508463  |
| C             | 1.500294  | -3.561352 | -0.414292 | C | -3.985294 | -2.247379 | 1.053080  |
| C             | 2.641648  | -4.142291 | 0.131204  | H | -2.436795 | -2.651987 | -0.368959 |
| C             | 3.925513  | -3.734274 | -0.257557 | C | -1.635388 | -3.824464 | 1.965447  |
| H             | 4.990844  | -2.432157 | -1.605297 | H | -1.540321 | -1.717055 | 2.390297  |
| H             | 2.987709  | -1.420306 | -2.581959 | H | -0.498254 | -2.200784 | 1.061484  |
| H             | 0.521518  | -3.902995 | -0.087567 | C | -4.125851 | -3.705695 | 1.525441  |
| H             | 2.533995  | -4.924410 | 0.880589  | H | -4.182445 | -1.576284 | 1.899465  |
| C             | 5.164333  | -4.308797 | 0.386856  | H | -4.747844 | -2.028381 | 0.297679  |
| H             | 4.999373  | -5.335208 | 0.733974  | C | -3.036185 | -4.081535 | 2.540839  |
| H             | 6.012251  | -4.320322 | -0.307732 | H | -0.861944 | -4.064971 | 2.706558  |
| H             | 5.471277  | -3.717278 | 1.261336  | H | -1.469583 | -4.494042 | 1.107935  |
| C             | 0.351892  | -1.912619 | -1.886768 | H | -5.122749 | -3.865432 | 1.956285  |
| C             | -3.140701 | 0.936738  | 0.859781  | H | -4.049122 | -4.372292 | 0.653400  |
| C             | -2.676441 | 0.919951  | 2.328476  | H | -3.142198 | -5.131424 | 2.841832  |
| C             | -2.978066 | 2.361669  | 0.290834  | H | -3.166823 | -3.476885 | 3.450897  |
| H             | -4.206169 | 0.670528  | 0.849464  | C | -3.334982 | -0.239252 | -1.817451 |
| C             | -3.447961 | 1.952022  | 3.169138  | C | -3.263969 | -1.557035 | -2.620568 |
| H             | -1.605834 | 1.143774  | 2.371827  | C | -4.817797 | 0.173249  | -1.678898 |
| H             | -2.806625 | -0.073619 | 2.768206  |   |           |           |           |

|   |           |           |           |   |           |           |           |
|---|-----------|-----------|-----------|---|-----------|-----------|-----------|
| H | -2.827559 | 0.531063  | -2.415477 | H | 2.187511  | -2.289640 | 4.711969  |
| C | -3.900474 | -1.398953 | -4.010928 | H | 1.300827  | -2.454121 | 3.192606  |
| H | -3.806514 | -2.342894 | -2.075955 | C | 1.415746  | 3.020054  | 0.283812  |
| H | -2.233190 | -1.901639 | -2.724058 | C | 0.594345  | 3.540228  | -0.917984 |
| C | -5.475593 | 0.334906  | -3.061608 | C | 0.761949  | 3.460472  | 1.606978  |
| H | -5.364822 | -0.589619 | -1.108603 | H | 2.411299  | 3.483771  | 0.245185  |
| H | -4.927606 | 1.111481  | -1.128499 | C | 0.379800  | 5.060006  | -0.852532 |
| C | -5.361634 | -0.943195 | -3.902989 | H | -0.369226 | 3.019470  | -0.936371 |
| H | -3.833506 | -2.346416 | -4.560838 | H | 1.077684  | 3.274124  | -1.861623 |
| H | -3.326199 | -0.657772 | -4.586272 | C | 0.548707  | 4.982094  | 1.663851  |
| H | -6.528468 | 0.621061  | -2.940314 | H | -0.210164 | 2.963501  | 1.715578  |
| H | -4.983764 | 1.163408  | -3.592791 | H | 1.376675  | 3.148732  | 2.458767  |
| H | -5.791474 | -0.785541 | -4.900304 | C | -0.274125 | 5.482214  | 0.469558  |
| H | -5.951349 | -1.741269 | -3.427343 | H | -0.232564 | 5.383948  | -1.704070 |
| P | -2.239865 | -0.283831 | -0.255852 | H | 1.350818  | 5.568857  | -0.951832 |
| C | 2.196591  | 0.500787  | 1.812014  | H | 0.057871  | 5.250362  | 2.608819  |
| C | 0.949356  | 0.274210  | 2.691318  | H | 1.527867  | 5.483811  | 1.663807  |
| C | 2.953062  | -0.836132 | 1.630636  | H | -0.388283 | 6.572908  | 0.513604  |
| H | 2.857680  | 1.229709  | 2.302764  | H | -1.286319 | 5.056352  | 0.525351  |
| C | 1.252257  | -0.452827 | 4.009448  | C | 3.315602  | 1.105863  | -0.819784 |
| H | 0.232084  | -0.314706 | 2.110110  | C | 3.204194  | 1.636541  | -2.262857 |
| H | 0.456751  | 1.223085  | 2.913267  | C | 4.532630  | 1.753894  | -0.127475 |
| C | 3.246962  | -1.550890 | 2.957296  | H | 3.511788  | 0.031961  | -0.895841 |
| H | 2.346341  | -1.499511 | 1.005332  | C | 4.481187  | 1.323910  | -3.060096 |
| H | 3.893558  | -0.686914 | 1.093866  | H | 3.065622  | 2.726132  | -2.243950 |
| C | 1.964716  | -1.786562 | 3.762214  | H | 2.320655  | 1.216569  | -2.753356 |
| H | 0.314808  | -0.609202 | 4.560143  | C | 5.821753  | 1.445880  | -0.911316 |
| H | 1.886907  | 0.183992  | 4.644079  | H | 4.397993  | 2.843735  | -0.077917 |
| H | 3.748649  | -2.503090 | 2.742529  | H | 4.640385  | 1.404414  | 0.904774  |
| H | 3.945798  | -0.948456 | 3.557602  | C | 5.721437  | 1.912337  | -2.371108 |

|                |           |           |           |   |           |           |           |
|----------------|-----------|-----------|-----------|---|-----------|-----------|-----------|
| H              | 4.391923  | 1.712257  | -4.082950 | H | -2.016259 | 0.221717  | 5.663377  |
| H              | 4.597828  | 0.233452  | -3.145559 | H | -0.809680 | -0.448033 | 4.565468  |
| H              | 6.683119  | 1.916000  | -0.419072 | C | -2.883310 | 1.485842  | -0.916959 |
| H              | 5.998943  | 0.360133  | -0.887935 | C | -3.215993 | 0.184417  | -1.661614 |
| H              | 6.631803  | 1.642767  | -2.921756 | C | -4.113693 | 1.968107  | -0.120271 |
| H              | 5.654071  | 3.010534  | -2.391968 | H | -2.667183 | 2.252593  | -1.673610 |
| P              | 1.677099  | 1.151466  | 0.108833  | C | -4.430925 | 0.349433  | -2.582473 |
| Ni             | -0.037157 | -0.022261 | -0.861908 | H | -3.426883 | -0.604092 | -0.932100 |
| C              | 0.285340  | -0.881901 | -2.846577 | H | -2.343878 | -0.158611 | -2.229095 |
| H              | 1.192278  | -0.532071 | -3.328693 | C | -5.337971 | 2.130890  | -1.038837 |
| H              | -0.591590 | -0.811211 | -3.480627 | H | -4.357217 | 1.232729  | 0.657298  |
| H              | -0.546380 | -2.500398 | -1.713223 | H | -3.908704 | 2.915133  | 0.391678  |
| H              | -0.091728 | 0.760678  | -2.232375 | C | -5.654681 | 0.831049  | -1.792332 |
|                |           |           |           | H | -4.643360 | -0.605058 | -3.076255 |
| <b>INT5A-2</b> |           |           |           | H | -4.198219 | 1.079374  | -3.373319 |
| C              | -1.783801 | 1.315950  | 1.843197  | H | -6.202921 | 2.455044  | -0.445453 |
| C              | -2.279294 | -0.101563 | 2.199546  | H | -5.138088 | 2.931429  | -1.767089 |
| C              | -0.677256 | 1.749482  | 2.822162  | H | -6.515823 | 0.975663  | -2.457157 |
| H              | -2.617184 | 2.019481  | 1.958113  | H | -5.937782 | 0.051937  | -1.068691 |
| C              | -2.753863 | -0.193436 | 3.656127  | C | -0.482265 | 3.002613  | -0.251033 |
| H              | -1.451166 | -0.802648 | 2.037494  | C | -0.062551 | 3.154528  | -1.730268 |
| H              | -3.075331 | -0.425106 | 1.520562  | C | -1.319581 | 4.219077  | 0.189983  |
| C              | -1.158977 | 1.666598  | 4.280354  | H | 0.436770  | 2.991155  | 0.349325  |
| H              | 0.191707  | 1.095127  | 2.701289  | C | 0.700874  | 4.468555  | -1.965737 |
| H              | -0.336753 | 2.768536  | 2.603250  | H | -0.957035 | 3.153471  | -2.368125 |
| C              | -1.653691 | 0.254934  | 4.628253  | H | 0.538699  | 2.292662  | -2.043976 |
| H              | -3.068285 | -1.221286 | 3.878150  | C | -0.544454 | 5.529336  | -0.031593 |
| H              | -3.640496 | 0.444069  | 3.791018  | H | -2.248348 | 4.253655  | -0.395170 |
| H              | -0.347104 | 1.966635  | 4.955499  | H | -1.614253 | 4.130879  | 1.242261  |
| H              | -1.977815 | 2.385492  | 4.432143  | C | -0.115676 | 5.682495  | -1.498159 |

|   |           |           |           |    |           |           |           |
|---|-----------|-----------|-----------|----|-----------|-----------|-----------|
| H | 0.957151  | 4.564841  | -3.028449 | H  | 3.717360  | 1.538296  | -1.646086 |
| H | 1.651063  | 4.442166  | -1.414755 | C  | 3.670479  | 2.846381  | 2.080542  |
| H | -1.157087 | 6.385058  | 0.279780  | H  | 1.771734  | 1.973983  | 1.556125  |
| H | 0.349412  | 5.531675  | 0.610424  | H  | 2.777084  | 0.929145  | 2.544739  |
| H | 0.462310  | 6.605392  | -1.632871 | C  | 3.712651  | 3.871660  | 0.939380  |
| H | -1.013595 | 5.777466  | -2.126695 | H  | 4.154294  | 3.938596  | -1.190745 |
| P | -1.251057 | 1.312083  | 0.038617  | H  | 5.232962  | 2.905699  | -0.255676 |
| C | 2.645882  | -1.634784 | 1.505049  | H  | 3.286545  | 3.309746  | 2.998674  |
| C | 1.365283  | -1.732129 | 2.360699  | H  | 4.692488  | 2.505375  | 2.302182  |
| C | 3.234495  | -3.040308 | 1.265278  | H  | 4.363808  | 4.715067  | 1.201475  |
| H | 3.397697  | -1.076248 | 2.080845  | H  | 2.703771  | 4.286573  | 0.793242  |
| C | 1.591851  | -2.482877 | 3.678769  | C  | 3.229714  | -1.341465 | -1.436792 |
| H | 0.591404  | -2.237937 | 1.767898  | C  | 2.651066  | -0.927599 | -2.807650 |
| H | 0.975764  | -0.730487 | 2.565604  | C  | 4.762991  | -1.186514 | -1.419644 |
| C | 3.472832  | -3.773293 | 2.598420  | H  | 3.011893  | -2.410412 | -1.325331 |
| H | 2.547879  | -3.635426 | 0.657317  | C  | 3.298021  | -1.739395 | -3.940575 |
| H | 4.177705  | -2.976824 | 0.712821  | H  | 2.828976  | 0.142279  | -2.984147 |
| C | 2.184179  | -3.875442 | 3.426456  | H  | 1.565291  | -1.070241 | -2.799180 |
| H | 0.646104  | -2.558579 | 4.231771  | C  | 5.402725  | -2.009670 | -2.551500 |
| H | 2.281571  | -1.904083 | 4.311875  | H  | 5.038374  | -0.132878 | -1.555500 |
| H | 3.879753  | -4.772963 | 2.399179  | H  | 5.178027  | -1.492553 | -0.451953 |
| H | 4.234840  | -3.233086 | 3.180455  | C  | 4.829158  | -1.614626 | -3.920727 |
| H | 2.378646  | -4.390212 | 4.375887  | H  | 2.900651  | -1.413747 | -4.910517 |
| H | 1.450891  | -4.484771 | 2.878109  | H  | 3.018130  | -2.796939 | -3.824747 |
| C | 3.291873  | 0.953945  | 0.415614  | H  | 6.492571  | -1.878395 | -2.540589 |
| C | 3.332488  | 1.986094  | -0.725542 | H  | 5.211441  | -3.078038 | -2.372097 |
| C | 2.801653  | 1.635617  | 1.707134  | H  | 5.274570  | -2.230719 | -4.712174 |
| H | 4.314659  | 0.589990  | 0.594828  | H  | 5.107950  | -0.572284 | -4.137875 |
| C | 4.183049  | 3.214968  | -0.365681 | P  | 2.252376  | -0.567668 | -0.024390 |
| H | 2.307975  | 2.301997  | -0.942483 | Ni | -0.037658 | -0.653681 | -0.531848 |

|               |           |           |           |   |           |           |           |
|---------------|-----------|-----------|-----------|---|-----------|-----------|-----------|
| C             | -0.427676 | -2.507227 | -1.355693 | H | 3.729852  | -2.482186 | -1.129969 |
| H             | -0.299433 | -2.390780 | -2.445541 | H | 6.084100  | -2.628780 | -0.614966 |
| C             | 0.420677  | -3.721000 | -0.934398 | C | 7.325798  | -2.426053 | 1.827061  |
| H             | 1.469297  | -3.591207 | -1.218809 | H | 7.518442  | -2.884203 | 2.803844  |
| H             | 0.392582  | -3.884024 | 0.149961  | H | 7.885826  | -2.988909 | 1.072077  |
| C             | -1.876179 | -2.799389 | -1.104978 | H | 7.747443  | -1.411808 | 1.856002  |
| C             | -2.809304 | -2.945583 | -2.150044 | C | 1.538779  | -2.047780 | 0.696181  |
| C             | -2.382299 | -2.949818 | 0.202135  | C | -2.851627 | -1.039163 | 2.144050  |
| C             | -4.164982 | -3.162510 | -1.904150 | C | -2.554513 | -2.418880 | 2.772663  |
| H             | -2.460359 | -2.867558 | -3.178179 | C | -2.264277 | 0.092749  | 3.008669  |
| C             | -3.736592 | -3.162927 | 0.450776  | H | -3.944054 | -0.937917 | 2.129248  |
| H             | -1.692459 | -2.865112 | 1.038026  | C | -3.002853 | -2.476663 | 4.243141  |
| C             | -4.663241 | -3.255155 | -0.598090 | H | -1.485228 | -2.643941 | 2.714026  |
| H             | -4.852474 | -3.258325 | -2.743559 | H | -3.070996 | -3.206600 | 2.219502  |
| H             | -4.084478 | -3.250359 | 1.479376  | C | -2.698782 | 0.009121  | 4.477991  |
| C             | -6.141784 | -3.419013 | -0.331998 | H | -1.171957 | 0.049753  | 2.932549  |
| H             | -6.657749 | -2.448209 | -0.308284 | H | -2.560162 | 1.064151  | 2.601760  |
| H             | -6.626852 | -4.019598 | -1.110498 | C | -2.364124 | -1.360939 | 5.078881  |
| H             | -6.326864 | -3.906705 | 0.632053  | H | -2.756772 | -3.461426 | 4.660517  |
| H             | 0.072560  | -4.657225 | -1.403273 | H | -4.098257 | -2.379122 | 4.290651  |
|               |           |           |           | H | -2.216286 | 0.811224  | 5.051716  |
|               |           |           |           | H | -3.783931 | 0.179144  | 4.549223  |
| <b>TS5B-1</b> |           |           |           | H | -2.703000 | -1.419177 | 6.121036  |
| C             | 4.890947  | -2.237304 | 2.521209  | H | -1.272469 | -1.495464 | 5.089716  |
| C             | 3.534508  | -2.131042 | 2.222572  | C | -2.929470 | -2.331649 | -0.541141 |
| C             | 3.046386  | -2.180825 | 0.899640  | C | -1.991436 | -3.544889 | -0.385800 |
| C             | 4.016383  | -2.395931 | -0.094529 | C | -4.394981 | -2.740267 | -0.286636 |
| C             | 5.377788  | -2.485007 | 0.200495  | H | -2.861237 | -2.034336 | -1.594951 |
| C             | 5.849563  | -2.391155 | 1.512447  | C | -2.395495 | -4.677681 | -1.339839 |
| H             | 5.209827  | -2.192689 | 3.561158  | H | -2.017603 | -3.925043 | 0.640726  |
| H             | 2.829162  | -2.010673 | 3.036790  |   |           |           |           |



|   |           |           |           |   |           |          |           |
|---|-----------|-----------|-----------|---|-----------|----------|-----------|
| H | -0.962997 | -3.230582 | -0.567765 | C | 3.420467  | 1.141126 | 1.108284  |
| C | -4.804105 | -3.892327 | -1.223712 | C | 3.661153  | 2.527441 | -0.989896 |
| H | -4.524650 | -3.057903 | 0.755420  | H | 2.814613  | 3.194320 | 0.855722  |
| H | -5.070368 | -1.891770 | -0.437000 | C | 4.886079  | 1.410455 | 1.471912  |
| C | -3.855194 | -5.094742 | -1.103501 | H | 3.358582  | 0.208470 | 0.544729  |
| H | -1.723797 | -5.535965 | -1.210956 | H | 2.837917  | 0.971795 | 2.017334  |
| H | -2.276014 | -4.338677 | -2.379634 | C | 5.130894  | 2.794594 | -0.616659 |
| H | -5.836957 | -4.197985 | -1.011895 | H | 3.622506  | 1.663351 | -1.659920 |
| H | -4.790808 | -3.526607 | -2.261395 | H | 3.281518  | 3.383194 | -1.556692 |
| H | -4.150095 | -5.882221 | -1.808536 | C | 5.726565  | 1.649890 | 0.213294  |
| H | -3.945437 | -5.524548 | -0.094572 | H | 5.276223  | 0.558275 | 2.039807  |
| C | -3.412267 | 0.585485  | -0.282266 | H | 4.948324  | 2.294136 | 2.126137  |
| C | -3.735368 | 0.459217  | -1.788862 | H | 5.714730  | 2.954573 | -1.532637 |
| C | -4.703967 | 0.891038  | 0.505268  | H | 5.192479  | 3.728462 | -0.037330 |
| H | -2.771463 | 1.466306  | -0.183621 | H | 6.768867  | 1.871535 | 0.477345  |
| C | -4.428999 | 1.723834  | -2.324201 | H | 5.738809  | 0.727523 | -0.385655 |
| H | -4.399129 | -0.398280 | -1.958992 | C | 0.250123  | 3.092741 | 1.266193  |
| H | -2.826203 | 0.270158  | -2.367382 | C | -1.271939 | 3.279177 | 1.160849  |
| C | -5.393504 | 2.157495  | -0.032799 | C | 0.628765  | 2.669168 | 2.701206  |
| H | -5.400290 | 0.044905  | 0.435492  | H | 0.728761  | 4.062531 | 1.065977  |
| H | -4.490998 | 1.034255  | 1.569015  | C | -1.808603 | 4.275159 | 2.200933  |
| C | -5.702090 | 2.042357  | -1.530861 | H | -1.746259 | 2.306965 | 1.314227  |
| H | -4.660617 | 1.594554  | -3.389358 | H | -1.557917 | 3.612078 | 0.158249  |
| H | -3.736763 | 2.574749  | -2.255361 | C | 0.091300  | 3.661153 | 3.746854  |
| H | -6.312307 | 2.350209  | 0.535941  | H | 0.226701  | 1.667216 | 2.893043  |
| H | -4.731948 | 3.020949  | 0.136340  | H | 1.715624  | 2.597207 | 2.809434  |
| H | -6.164010 | 2.966642  | -1.900387 | C | -1.425558 | 3.858066 | 3.627127  |
| H | -6.436045 | 1.237602  | -1.686805 | H | -2.899458 | 4.358634 | 2.103840  |
| P | -2.264027 | -0.811607 | 0.354827  | H | -1.396199 | 5.273407 | 1.991526  |
| C | 2.797448  | 2.266698  | 0.264001  | H | 0.352961  | 3.312611 | 4.754307  |

|    |           |           |           |                |           |           |           |
|----|-----------|-----------|-----------|----------------|-----------|-----------|-----------|
| H  | 0.591852  | 4.631573  | 3.610183  | H              | 4.192344  | -0.507052 | -3.885667 |
| H  | -1.773309 | 4.605743  | 4.351358  | H              | 3.895472  | -2.151932 | -3.315122 |
| H  | -1.932776 | 2.916592  | 3.877738  | H              | 2.789238  | -1.409125 | -4.469767 |
| C  | 0.607608  | 2.787107  | -1.655578 | C              | 1.458412  | -3.618965 | -1.977217 |
| C  | -0.706133 | 2.326303  | -2.309822 | C              | 1.355868  | -4.128974 | -3.426462 |
| C  | 0.684598  | 4.326737  | -1.639345 | H              | 0.696263  | -4.141543 | -1.381570 |
| H  | 1.415859  | 2.422698  | -2.304280 | H              | 2.411597  | -3.943602 | -1.547019 |
| C  | -0.855640 | 2.894409  | -3.728406 | H              | 1.487413  | -5.218457 | -3.472553 |
| H  | -1.558619 | 2.650003  | -1.701497 | H              | 0.378169  | -3.905541 | -3.867722 |
| H  | -0.736696 | 1.234932  | -2.328793 | H              | 2.117061  | -3.682754 | -4.074468 |
| C  | 0.554579  | 4.893404  | -3.063727 | C              | -0.394454 | -1.431934 | -2.804386 |
| H  | -0.131099 | 4.731779  | -1.026843 | C              | -0.112145 | -0.985055 | -4.248485 |
| H  | 1.617413  | 4.671750  | -1.178726 | H              | -1.059847 | -0.703751 | -2.339296 |
| C  | -0.748285 | 4.426539  | -3.731790 | H              | -0.955328 | -2.374508 | -2.817605 |
| H  | -1.812966 | 2.574501  | -4.159855 | H              | -1.047317 | -0.848969 | -4.809888 |
| H  | -0.066019 | 2.472371  | -4.367335 | H              | 0.421582  | -0.028626 | -4.277869 |
| H  | 0.598994  | 5.989852  | -3.037622 | H              | 0.493631  | -1.714898 | -4.794876 |
| H  | 1.412132  | 4.556592  | -3.664973 | H              | 1.085014  | -3.030847 | 0.566802  |
| H  | -0.812983 | 4.813858  | -4.756395 |                |           |           |           |
| H  | -1.603436 | 4.846980  | -3.180891 | <b>INT5B-1</b> |           |           |           |
| P  | 0.943194  | 1.890391  | -0.025028 | C              | 2.024526  | 3.831674  | 0.495859  |
| Ni | 0.026800  | -0.263409 | 0.141185  | C              | 2.178058  | 2.576951  | -0.096114 |
| C  | 0.819906  | -1.238573 | 1.698679  | C              | 2.531411  | 1.444848  | 0.657783  |
| H  | 0.106114  | -1.789955 | 2.306967  | C              | 2.716601  | 1.639756  | 2.037999  |
| H  | 1.439886  | -0.592622 | 2.318144  | C              | 2.553231  | 2.890552  | 2.631505  |
| Si | 1.166804  | -1.725847 | -1.666463 | C              | 2.198501  | 4.014259  | 1.873148  |
| C  | 2.567946  | -0.649530 | -2.421744 | H              | 1.753475  | 4.684026  | -0.125435 |
| C  | 3.402907  | -1.209817 | -3.585580 | H              | 2.024143  | 2.473154  | -1.163375 |
| H  | 3.241226  | -0.364159 | -1.609398 | H              | 2.996056  | 0.792076  | 2.658219  |
| H  | 2.081658  | 0.282679  | -2.737631 | H              | 2.700548  | 2.995603  | 3.704970  |

|   |           |           |           |   |           |           |           |
|---|-----------|-----------|-----------|---|-----------|-----------|-----------|
| C | 1.960638  | 5.355662  | 2.525713  | H | -2.934145 | 3.688967  | -2.549971 |
| H | 2.614580  | 5.503984  | 3.392530  | H | -2.881615 | 4.363565  | -0.928051 |
| H | 2.134726  | 6.181073  | 1.826364  | C | -0.669701 | 4.943000  | -3.556981 |
| H | 0.925050  | 5.445130  | 2.883782  | H | 0.861184  | 3.504039  | -4.129172 |
| C | 2.747051  | 0.095492  | 0.015898  | H | 1.043665  | 4.152359  | -2.501501 |
| C | -3.622745 | 1.206202  | -1.209035 | H | -2.253499 | 6.084872  | -2.596810 |
| C | -3.494630 | 0.406223  | -2.524610 | H | -0.880805 | 5.728844  | -1.549471 |
| C | -4.593544 | 0.510029  | -0.237117 | H | -0.120865 | 5.822887  | -3.916021 |
| H | -4.042465 | 2.193157  | -1.441002 | H | -1.333545 | 4.628996  | -4.376357 |
| C | -4.860761 | 0.125483  | -3.167809 | C | -2.195216 | 2.008853  | 1.283209  |
| H | -2.983206 | -0.542348 | -2.310478 | C | -0.855932 | 2.080429  | 2.040736  |
| H | -2.853332 | 0.943208  | -3.232994 | C | -3.004362 | 3.297214  | 1.518004  |
| C | -5.953358 | 0.220890  | -0.893311 | H | -2.761440 | 1.169016  | 1.713075  |
| H | -4.148944 | -0.429660 | 0.103343  | C | -1.072176 | 2.321891  | 3.540533  |
| H | -4.748323 | 1.123514  | 0.657036  | H | -0.238722 | 2.887658  | 1.632087  |
| C | -5.802264 | -0.588485 | -2.188535 | H | -0.289112 | 1.159746  | 1.884432  |
| H | -4.727181 | -0.471994 | -4.078658 | C | -3.241621 | 3.525143  | 3.021032  |
| H | -5.317630 | 1.076989  | -3.478452 | H | -2.440092 | 4.151122  | 1.120627  |
| H | -6.601616 | -0.308528 | -0.182993 | H | -3.961679 | 3.271553  | 0.982593  |
| H | -6.451184 | 1.175055  | -1.121459 | C | -1.913312 | 3.582183  | 3.790954  |
| H | -6.783648 | -0.754059 | -2.650679 | H | -0.098630 | 2.402483  | 4.039213  |
| H | -5.394164 | -1.581824 | -1.951389 | H | -1.584614 | 1.450681  | 3.976843  |
| C | -1.245433 | 2.970272  | -1.392488 | H | -3.813982 | 4.449163  | 3.174538  |
| C | -0.434349 | 2.581568  | -2.649741 | H | -3.856756 | 2.703223  | 3.417201  |
| C | -2.255140 | 4.072599  | -1.775199 | H | -2.099202 | 3.716153  | 4.864264  |
| H | -0.531996 | 3.390522  | -0.669285 | H | -1.344549 | 4.463297  | 3.456714  |
| C | 0.301705  | 3.798837  | -3.232189 | P | -1.902377 | 1.447880  | -0.483395 |
| H | -1.114732 | 2.179317  | -3.413707 | C | -0.230147 | -3.560738 | -1.046351 |
| H | 0.273147  | 1.781795  | -2.416797 | C | -0.644885 | -2.993256 | -2.424206 |
| C | -1.525224 | 5.306363  | -2.335003 | C | 1.237602  | -4.031579 | -1.091038 |

|   |           |           |           |    |           |           |           |
|---|-----------|-----------|-----------|----|-----------|-----------|-----------|
| H | -0.846516 | -4.446805 | -0.832537 | H  | -5.442525 | -1.886966 | 1.253392  |
| C | -0.407570 | -3.999206 | -3.559501 | C  | 0.609197  | -2.613099 | 1.656619  |
| H | -0.062052 | -2.080009 | -2.606439 | C  | 0.733789  | -1.437064 | 2.647042  |
| H | -1.696192 | -2.683015 | -2.411103 | C  | 0.454733  | -3.944381 | 2.416615  |
| C | 1.474875  | -5.033187 | -2.234011 | H  | 1.558928  | -2.645834 | 1.106259  |
| H | 1.894341  | -3.166956 | -1.232458 | C  | 1.902029  | -1.659869 | 3.619655  |
| H | 1.526310  | -4.497876 | -0.143597 | H  | -0.193875 | -1.319652 | 3.221854  |
| C | 1.056721  | -4.456365 | -3.592780 | H  | 0.877653  | -0.505846 | 2.093292  |
| H | -0.692784 | -3.551118 | -4.520204 | C  | 1.635409  | -4.166946 | 3.376910  |
| H | -1.058122 | -4.875231 | -3.413657 | H  | -0.474520 | -3.928149 | 3.002393  |
| H | 2.532765  | -5.325613 | -2.250361 | H  | 0.368917  | -4.787302 | 1.719796  |
| H | 0.897501  | -5.949335 | -2.037063 | C  | 1.775311  | -2.997496 | 4.363329  |
| H | 1.212690  | -5.197041 | -4.387533 | H  | 1.957814  | -0.826812 | 4.332191  |
| H | 1.696794  | -3.593955 | -3.830880 | H  | 2.844689  | -1.652391 | 3.052092  |
| C | -2.239675 | -3.007758 | 0.966595  | H  | 1.506302  | -5.112195 | 3.919867  |
| C | -2.781050 | -2.186129 | 2.153363  | H  | 2.562238  | -4.261936 | 2.791898  |
| C | -3.314029 | -3.164743 | -0.129633 | H  | 2.639288  | -3.153902 | 5.021517  |
| H | -1.998519 | -4.016703 | 1.331728  | H  | 0.885910  | -2.966806 | 5.010552  |
| C | -4.097181 | -2.761254 | 2.701822  | P  | -0.635924 | -2.268238 | 0.284852  |
| H | -2.935057 | -1.146713 | 1.834092  | Ni | -0.225152 | -0.173745 | -0.556668 |
| H | -2.040888 | -2.150689 | 2.958807  | C  | 1.722520  | -0.260648 | -1.098933 |
| C | -4.636858 | -3.718034 | 0.426796  | H  | 1.855087  | 0.439369  | -1.943642 |
| H | -3.492394 | -2.195028 | -0.608408 | H  | 2.002885  | -1.231453 | -1.529278 |
| H | -2.958262 | -3.834637 | -0.919581 | Si | 4.562204  | -0.062908 | -0.592176 |
| C | -5.163118 | -2.888760 | 1.606231  | C  | 4.763457  | 0.960005  | -2.186140 |
| H | -4.464197 | -2.132136 | 3.523111  | C  | 6.198386  | 1.358677  | -2.575364 |
| H | -3.900909 | -3.755234 | 3.130887  | H  | 4.159954  | 1.869236  | -2.057231 |
| H | -5.385186 | -3.760271 | -0.375576 | H  | 4.290628  | 0.406219  | -3.008953 |
| H | -4.476096 | -4.753579 | 0.761481  | H  | 6.216004  | 1.955945  | -3.496523 |
| H | -6.076063 | -3.342711 | 2.012362  | H  | 6.671373  | 1.959318  | -1.789412 |

|               |           |           |           |   |           |           |           |
|---------------|-----------|-----------|-----------|---|-----------|-----------|-----------|
| H             | 6.835675  | 0.482757  | -2.743717 | H | -5.489847 | 4.411887  | -2.826199 |
| C             | 5.756538  | 0.558036  | 0.762011  | H | -4.928344 | 4.914409  | -1.229463 |
| C             | 7.210867  | 0.060616  | 0.676976  | C | -0.254240 | 0.838286  | -2.339863 |
| H             | 5.330223  | 0.262729  | 1.731972  | C | 2.704672  | 0.271892  | 1.974260  |
| H             | 5.731908  | 1.656661  | 0.764673  | C | 1.784509  | 0.818792  | 3.079259  |
| H             | 7.823597  | 0.455067  | 1.498402  | C | 2.884103  | -1.243180 | 2.192922  |
| H             | 7.261916  | -1.033647 | 0.729945  | H | 3.682458  | 0.757980  | 2.081885  |
| H             | 7.690877  | 0.362008  | -0.260794 | C | 2.328085  | 0.507544  | 4.483874  |
| C             | 4.897283  | -1.915475 | -0.914650 | H | 0.794972  | 0.365757  | 2.965984  |
| C             | 6.022189  | -2.240348 | -1.914082 | H | 1.649028  | 1.898628  | 2.982066  |
| H             | 3.961974  | -2.367301 | -1.269867 | C | 3.455846  | -1.561017 | 3.582227  |
| H             | 5.110535  | -2.394188 | 0.053144  | H | 1.900873  | -1.719973 | 2.104077  |
| H             | 6.147118  | -3.322938 | -2.048619 | H | 3.511295  | -1.691007 | 1.417061  |
| H             | 5.809563  | -1.810827 | -2.900382 | C | 2.554512  | -0.995915 | 4.687542  |
| H             | 6.987409  | -1.838184 | -1.585928 | H | 1.634409  | 0.897537  | 5.240121  |
| H             | 2.668205  | -0.659523 | 0.810446  | H | 3.280834  | 1.038993  | 4.627002  |
|               |           |           |           | H | 3.568863  | -2.646893 | 3.695991  |
| <b>TS5B-2</b> |           |           |           | H | 4.462884  | -1.126878 | 3.672033  |
| C             | -3.735678 | 2.383201  | -2.631079 | H | 2.985373  | -1.190417 | 5.677768  |
| C             | -2.709719 | 1.440046  | -2.659970 | H | 1.584267  | -1.514803 | 4.657382  |
| C             | -1.369192 | 1.788437  | -2.378735 | C | 2.066531  | 2.546954  | 0.146108  |
| C             | -1.125485 | 3.166896  | -2.179762 | C | 0.744643  | 3.159987  | 0.642872  |
| C             | -2.149814 | 4.104862  | -2.148017 | C | 3.266487  | 3.274033  | 0.788801  |
| C             | -3.489163 | 3.731831  | -2.347393 | H | 2.093986  | 2.735163  | -0.935578 |
| H             | -4.753941 | 2.062663  | -2.847582 | C | 0.693090  | 4.673452  | 0.382189  |
| H             | -2.952867 | 0.419353  | -2.936519 | H | 0.644213  | 3.009458  | 1.721891  |
| H             | -0.098557 | 3.492814  | -2.047389 | H | -0.096548 | 2.648941  | 0.168061  |
| H             | -1.906862 | 5.151484  | -1.971435 | C | 3.203896  | 4.793360  | 0.551621  |
| C             | -4.607477 | 4.743713  | -2.267183 | H | 3.273216  | 3.084653  | 1.870806  |
| H             | -4.301283 | 5.716394  | -2.670605 | H | 4.212662  | 2.888739  | 0.399338  |

|   |           |           |           |   |           |           |           |
|---|-----------|-----------|-----------|---|-----------|-----------|-----------|
| C | 1.878083  | 5.388739  | 1.043313  | H | -0.789162 | 1.778528  | 2.199608  |
| H | -0.259615 | 5.079185  | 0.745000  | H | -1.316369 | 0.715645  | 3.484825  |
| H | 0.720278  | 4.865936  | -0.698625 | C | -3.800497 | 3.034669  | 1.484058  |
| H | 4.054253  | 5.280434  | 1.046267  | H | -2.312014 | 2.227493  | 0.149358  |
| H | 3.309946  | 4.991862  | -0.525458 | H | -3.861368 | 1.439857  | 0.039510  |
| H | 1.842862  | 6.466167  | 0.838254  | C | -2.835636 | 3.675850  | 2.486919  |
| H | 1.810916  | 5.271619  | 2.135583  | H | -1.582526 | 3.067475  | 4.160866  |
| C | 3.677731  | 0.251841  | -0.812353 | H | -3.147817 | 2.260534  | 4.091153  |
| C | 3.769807  | 1.125206  | -2.084467 | H | -4.134568 | 3.772107  | 0.744409  |
| C | 5.050366  | 0.232803  | -0.100378 | H | -4.698735 | 2.685048  | 2.015964  |
| H | 3.486322  | -0.772944 | -1.146678 | H | -3.322210 | 4.499784  | 3.024659  |
| C | 4.887118  | 0.652086  | -3.029881 | H | -1.987476 | 4.109428  | 1.938409  |
| H | 3.982035  | 2.164686  | -1.803137 | C | -1.876996 | -2.132925 | 2.001942  |
| H | 2.810127  | 1.130799  | -2.612567 | C | -0.838822 | -3.179117 | 1.559726  |
| C | 6.156306  | -0.258535 | -1.051450 | C | -1.668922 | -1.814075 | 3.494585  |
| H | 5.311622  | 1.237288  | 0.254281  | H | -2.875030 | -2.584113 | 1.914933  |
| H | 5.032675  | -0.413501 | 0.781148  | C | -0.906484 | -4.460718 | 2.400227  |
| C | 6.242727  | 0.608144  | -2.313594 | H | 0.154231  | -2.733233 | 1.677146  |
| H | 4.933522  | 1.316149  | -3.902611 | H | -0.940506 | -3.414079 | 0.496116  |
| H | 4.649541  | -0.349649 | -3.408155 | C | -1.738502 | -3.090400 | 4.352062  |
| H | 7.118728  | -0.268432 | -0.523649 | H | -0.685562 | -1.345287 | 3.636619  |
| H | 5.944434  | -1.298833 | -1.340337 | H | -2.420496 | -1.100213 | 3.847784  |
| H | 7.020207  | 0.228126  | -2.988283 | C | -0.722963 | -4.144882 | 3.890773  |
| H | 6.540161  | 1.629215  | -2.030880 | H | -0.140539 | -5.168272 | 2.058137  |
| P | 2.105160  | 0.651682  | 0.216059  | H | -1.880788 | -4.948345 | 2.246200  |
| C | -2.629506 | 0.777119  | 1.733491  | H | -1.574005 | -2.834970 | 5.406886  |
| C | -1.668770 | 1.432945  | 2.742326  | H | -2.752647 | -3.511542 | 4.284846  |
| C | -3.146499 | 1.854008  | 0.752467  | H | -0.815170 | -5.055885 | 4.495338  |
| H | -3.484592 | 0.373174  | 2.294492  | H | 0.295191  | -3.759146 | 4.052668  |
| C | -2.313436 | 2.623303  | 3.471900  | C | -3.343992 | -1.162849 | -0.292563 |

|    |           |           |           |                |           |           |           |
|----|-----------|-----------|-----------|----------------|-----------|-----------|-----------|
| C  | -3.119119 | -2.503480 | -1.015582 | H              | 1.558524  | -2.741825 | 0.388856  |
| C  | -4.736161 | -1.182795 | 0.374795  | C              | -0.999174 | -3.506045 | -3.932699 |
| H  | -3.357922 | -0.379109 | -1.056330 | H              | -1.431497 | -4.453320 | -4.281161 |
| C  | -4.197976 | -2.744839 | -2.082714 | H              | -1.831691 | -2.816618 | -3.764167 |
| H  | -3.154359 | -3.328299 | -0.289458 | H              | -0.406328 | -3.099383 | -4.761296 |
| H  | -2.128383 | -2.526465 | -1.466841 | C              | 3.442413  | -2.872081 | -3.425954 |
| C  | -5.834238 | -1.420045 | -0.678802 | H              | 3.164298  | -3.932919 | -3.445286 |
| H  | -4.779787 | -1.984204 | 1.126176  | H              | 4.069391  | -2.684150 | -4.307604 |
| H  | -4.948576 | -0.248408 | 0.900897  | H              | 4.075188  | -2.721145 | -2.543486 |
| C  | -5.602787 | -2.717887 | -1.465076 | C              | 1.967841  | -4.652999 | -0.507022 |
| H  | -4.016601 | -3.701092 | -2.589306 | H              | 2.584505  | -5.005140 | 0.331651  |
| H  | -4.122102 | -1.962580 | -2.852899 | H              | 0.965029  | -5.073269 | -0.371192 |
| H  | -6.819041 | -1.436750 | -0.194158 | H              | 2.383304  | -5.089373 | -1.422416 |
| H  | -5.840572 | -0.569102 | -1.376101 | H              | 0.683368  | 1.280035  | -2.681279 |
| H  | -6.368294 | -2.836335 | -2.242465 |                |           |           |           |
| H  | -5.710122 | -3.574935 | -0.783370 | <b>INT5B-2</b> |           |           |           |
| P  | -1.860704 | -0.670748 | 0.777643  | C              | -3.895741 | -2.040526 | 2.062485  |
| Ni | 0.180774  | -0.316439 | -0.659868 | C              | -3.381338 | -1.232278 | 1.048017  |
| C  | -0.432865 | -0.572987 | -2.658813 | C              | -2.480943 | -0.176289 | 1.313807  |
| H  | -1.460169 | -0.925345 | -2.633382 | C              | -2.210972 | 0.056474  | 2.684332  |
| H  | 0.033715  | -0.907682 | -3.586451 | C              | -2.721234 | -0.752642 | 3.693279  |
| Si | 0.929648  | -2.266215 | -1.988463 | C              | -3.564903 | -1.838095 | 3.406744  |
| C  | -0.146047 | -3.713506 | -2.670975 | H              | -4.581270 | -2.845109 | 1.798775  |
| H  | 0.590978  | -4.501734 | -2.883470 | H              | -3.699691 | -1.421467 | 0.027756  |
| H  | -0.771165 | -4.126266 | -1.868068 | H              | -1.582156 | 0.900929  | 2.952422  |
| C  | 2.202070  | -1.964185 | -3.408320 | H              | -2.471893 | -0.530046 | 4.730118  |
| H  | 1.664591  | -2.101306 | -4.357380 | C              | -4.088335 | -2.739675 | 4.499924  |
| H  | 2.508885  | -0.912665 | -3.405391 | H              | -3.367234 | -3.527650 | 4.762306  |
| C  | 1.934692  | -3.116346 | -0.558538 | H              | -4.296122 | -2.179340 | 5.419633  |
| H  | 2.962090  | -2.739425 | -0.626591 | H              | -5.015205 | -3.240571 | 4.197449  |

|   |           |           |           |   |           |           |           |
|---|-----------|-----------|-----------|---|-----------|-----------|-----------|
| C | -1.813321 | 0.630423  | 0.265975  | H | -0.072336 | 2.294960  | 4.082430  |
| C | 3.855294  | 1.290102  | 0.075914  | H | 3.167182  | 4.294961  | 4.297628  |
| C | 4.307734  | 0.117629  | 0.967044  | H | 1.513549  | 4.373163  | 3.691576  |
| C | 4.340226  | 1.075815  | -1.372326 | H | 1.571991  | 3.042099  | 5.790345  |
| H | 4.321033  | 2.209677  | 0.455228  | H | 2.800010  | 1.976459  | 5.108587  |
| C | 5.825668  | -0.108255 | 0.898607  | C | 1.704613  | 2.966220  | -1.011014 |
| H | 3.791917  | -0.789821 | 0.637287  | C | 0.219098  | 3.374363  | -1.052911 |
| H | 4.006289  | 0.281093  | 2.007216  | C | 2.588242  | 4.217545  | -0.848635 |
| C | 5.858678  | 0.843739  | -1.439405 | H | 1.933999  | 2.517058  | -1.989368 |
| H | 3.828955  | 0.203676  | -1.795248 | C | -0.052206 | 4.389521  | -2.174290 |
| H | 4.076395  | 1.931485  | -2.003517 | H | -0.068503 | 3.816304  | -0.088259 |
| C | 6.291488  | -0.326906 | -0.546897 | H | -0.410131 | 2.491649  | -1.189984 |
| H | 6.099834  | -0.966603 | 1.525194  | C | 2.332610  | 5.219979  | -1.987919 |
| H | 6.343037  | 0.767233  | 1.318388  | H | 2.350070  | 4.705202  | 0.105489  |
| H | 6.157278  | 0.663952  | -2.480320 | H | 3.651532  | 3.953986  | -0.814302 |
| H | 6.378396  | 1.757571  | -1.115494 | C | 0.852162  | 5.623745  | -2.052886 |
| H | 7.380415  | -0.455350 | -0.585481 | H | -1.109152 | 4.683827  | -2.160475 |
| H | 5.849905  | -1.257847 | -0.932624 | H | 0.125964  | 3.902201  | -3.144667 |
| C | 1.695864  | 2.227614  | 1.900932  | H | 2.966441  | 6.106045  | -1.854765 |
| C | 1.293063  | 1.113885  | 2.894629  | H | 2.628040  | 4.761166  | -2.943406 |
| C | 2.810138  | 3.095019  | 2.522578  | H | 0.679249  | 6.310154  | -2.891216 |
| H | 0.807769  | 2.862048  | 1.758265  | H | 0.590204  | 6.173416  | -1.136390 |
| C | 0.840093  | 1.700550  | 4.238954  | P | 1.985719  | 1.523418  | 0.171235  |
| H | 2.149332  | 0.448918  | 3.068792  | C | 0.773662  | -3.155285 | 0.929701  |
| H | 0.499279  | 0.491928  | 2.468539  | C | 1.965876  | -2.569043 | 1.715406  |
| C | 2.358032  | 3.690462  | 3.868010  | C | -0.489809 | -3.117383 | 1.819560  |
| H | 3.700105  | 2.474362  | 2.694623  | H | 0.999280  | -4.196302 | 0.655969  |
| H | 3.117330  | 3.898761  | 1.847191  | C | 2.168311  | -3.239516 | 3.082792  |
| C | 1.926337  | 2.594796  | 4.853223  | H | 1.780344  | -1.498224 | 1.862198  |
| H | 0.570389  | 0.888444  | 4.926081  | H | 2.889391  | -2.649579 | 1.138248  |



|   |           |           |           |    |           |           |           |
|---|-----------|-----------|-----------|----|-----------|-----------|-----------|
| C | -0.280659 | -3.794904 | 3.180306  | H  | -1.882370 | -2.537999 | -0.558579 |
| H | -0.768741 | -2.071635 | 1.987616  | C  | -2.975307 | -2.720045 | -3.032134 |
| H | -1.343838 | -3.579075 | 1.319578  | H  | -0.859572 | -2.660518 | -3.432051 |
| C | 0.896744  | -3.170062 | 3.936335  | H  | -1.462988 | -1.204166 | -2.636705 |
| H | 3.010861  | -2.761241 | 3.600361  | C  | -2.649492 | -4.871936 | -1.728630 |
| H | 2.448286  | -4.293375 | 2.934279  | H  | -0.516993 | -4.807431 | -2.100330 |
| H | -1.204548 | -3.704495 | 3.763180  | H  | -0.944160 | -4.879003 | -0.394234 |
| H | -0.092473 | -4.870038 | 3.036768  | C  | -3.107006 | -4.250277 | -3.056726 |
| H | 1.051560  | -3.670100 | 4.901070  | H  | -3.250595 | -2.295243 | -4.006111 |
| H | 0.661361  | -2.117590 | 4.154474  | H  | -3.680694 | -2.303890 | -2.298445 |
| C | 1.685333  | -2.684358 | -1.957777 | H  | -2.698323 | -5.967206 | -1.783852 |
| C | 1.817691  | -1.555200 | -3.004797 | H  | -3.338305 | -4.565059 | -0.927851 |
| C | 3.079192  | -3.096622 | -1.450427 | H  | -4.141095 | -4.543274 | -3.278233 |
| H | 1.250065  | -3.563047 | -2.455081 | H  | -2.484512 | -4.648912 | -3.871940 |
| C | 2.753727  | -1.946346 | -4.159413 | P  | 0.449123  | -2.141361 | -0.631044 |
| H | 2.196928  | -0.658929 | -2.499346 | Ni | 0.130644  | 0.046615  | -0.090694 |
| H | 0.836958  | -1.277574 | -3.402450 | C  | -2.589481 | 0.815844  | -1.057395 |
| C | 4.000902  | -3.508755 | -2.610475 | H  | -1.912634 | 1.193914  | -1.839982 |
| H | 3.540561  | -2.253119 | -0.921296 | H  | -2.923640 | -0.152863 | -1.444503 |
| H | 2.998971  | -3.920350 | -0.731884 | Si | -4.072810 | 2.004181  | -1.012617 |
| C | 4.133090  | -2.386185 | -3.648971 | C  | -4.595081 | 2.371459  | -2.810542 |
| H | 2.853634  | -1.106112 | -4.858756 | H  | -5.457698 | 3.052519  | -2.811578 |
| H | 2.298827  | -2.773252 | -4.724886 | H  | -3.780586 | 2.923513  | -3.303180 |
| H | 4.988349  | -3.786743 | -2.219260 | C  | -5.546284 | 1.244343  | -0.078493 |
| H | 3.589916  | -4.406008 | -3.096290 | H  | -5.826708 | 0.309298  | -0.585191 |
| H | 4.765313  | -2.711377 | -4.484882 | H  | -5.197611 | 0.938074  | 0.915818  |
| H | 4.641319  | -1.526981 | -3.187582 | C  | -3.533249 | 3.629980  | -0.169049 |
| C | -1.144643 | -2.887344 | -1.289328 | H  | -3.622485 | 3.493488  | 0.918205  |
| C | -1.546939 | -2.295497 | -2.655771 | H  | -2.460080 | 3.764514  | -0.358116 |
| C | -1.225206 | -4.425597 | -1.350528 | C  | -4.929372 | 1.108106  | -3.626117 |

|                  |           |           |           |                   |           |           |           |
|------------------|-----------|-----------|-----------|-------------------|-----------|-----------|-----------|
| H                | -5.222228 | 1.347820  | -4.656621 | H                 | -2.537617 | -0.001949 | 2.110578  |
| H                | -4.070817 | 0.426724  | -3.679694 | C                 | -5.396648 | -0.500695 | 0.163303  |
| H                | -5.757832 | 0.548353  | -3.174157 | H                 | -5.297390 | -0.624779 | -2.009882 |
| C                | -6.779796 | 2.155921  | 0.050753  | H                 | -4.721239 | 0.900050  | -1.342607 |
| H                | -7.151655 | 2.480484  | -0.929563 | H                 | -5.046800 | -0.197196 | 2.292416  |
| H                | -7.608512 | 1.649422  | 0.562407  | H                 | -4.569490 | 1.160722  | 1.277461  |
| H                | -6.548432 | 3.060231  | 0.626551  | H                 | -6.415448 | -0.095063 | 0.181738  |
| C                | -4.287805 | 4.899967  | -0.602378 | H                 | -5.488497 | -1.591270 | 0.276997  |
| H                | -3.923206 | 5.790748  | -0.073900 | C                 | 2.471441  | -0.137174 | -0.044599 |
| H                | -4.169841 | 5.086309  | -1.676888 | C                 | 3.131504  | -0.451950 | 1.306445  |
| H                | -5.363550 | 4.822779  | -0.406430 | C                 | 3.278598  | -0.706413 | -1.220577 |
| H                | -1.587204 | 1.622113  | 0.696092  | H                 | 2.410062  | 0.951188  | -0.157021 |
|                  |           |           |           | C                 | 4.578760  | 0.062987  | 1.335482  |
| <b>INT1A-NHC</b> |           |           |           | H                 | 3.123934  | -1.539826 | 1.467858  |
| C                | 0.000012  | 0.245241  | -0.098532 | H                 | 2.537587  | -0.001734 | 2.110522  |
| C                | 0.679040  | -1.924583 | -0.015713 | C                 | 4.725264  | -0.187774 | -1.182855 |
| C                | -0.678987 | -1.924587 | -0.015680 | H                 | 3.286336  | -1.804539 | -1.162935 |
| H                | 1.380849  | -2.742747 | 0.016029  | H                 | 2.787493  | -0.436277 | -2.162853 |
| H                | -1.380781 | -2.742764 | 0.016028  | C                 | 5.396646  | -0.500677 | 0.163344  |
| N                | -1.075333 | -0.597045 | -0.070313 | H                 | 5.046771  | -0.196982 | 2.292423  |
| N                | 1.075363  | -0.597039 | -0.070339 | H                 | 4.569482  | 1.160850  | 1.277341  |
| C                | -2.471423 | -0.137206 | -0.044557 | H                 | 5.297413  | -0.624977 | -2.009833 |
| C                | -3.278575 | -0.706311 | -1.220608 | H                 | 4.721269  | 0.899926  | -1.342721 |
| C                | -3.131521 | -0.452091 | 1.306449  | H                 | 6.415455  | -0.095061 | 0.181753  |
| H                | -2.410033 | 0.951166  | -0.156874 | H                 | 5.488471  | -1.591241 | 0.277149  |
| C                | -4.725241 | -0.187667 | -1.182857 | Ni                | -0.000031 | 2.190807  | -0.140307 |
| H                | -3.286334 | -1.804443 | -1.163084 | H                 | -0.000020 | 3.735287  | -0.169511 |
| H                | -2.787458 | -0.436090 | -2.162854 |                   |           |           |           |
| C                | -4.578772 | 0.062853  | 1.335504  | <b>TS2A-NHC-1</b> |           |           |           |
| H                | -3.123956 | -1.539980 | 1.467760  | C                 | 4.557030  | 1.637793  | -0.042315 |

|    |           |           |           |   |           |           |           |
|----|-----------|-----------|-----------|---|-----------|-----------|-----------|
| C  | 3.226190  | 2.060708  | -0.070731 | C | 0.082679  | 1.787251  | -2.141283 |
| C  | 2.301220  | 1.456808  | -0.929039 | H | -0.697750 | 2.535878  | -2.260382 |
| C  | 2.755675  | 0.423659  | -1.767198 | H | 0.609329  | 1.541814  | -3.061888 |
| C  | 4.083185  | 0.005947  | -1.731776 | C | -1.075060 | -1.418837 | -0.251968 |
| C  | 5.010434  | 0.598065  | -0.861379 | C | -1.062964 | -3.349883 | 0.944313  |
| H  | 5.254362  | 2.123993  | 0.637024  | C | -2.362633 | -3.011460 | 0.735582  |
| H  | 2.895786  | 2.865887  | 0.575435  | H | -0.632784 | -4.194423 | 1.458621  |
| H  | 2.053412  | -0.074779 | -2.429043 | H | -3.273173 | -3.505608 | 1.034580  |
| H  | 4.405752  | -0.799005 | -2.389581 | N | -2.351689 | -1.835860 | -0.003251 |
| C  | 6.434061  | 0.097737  | -0.790663 | N | -0.291320 | -2.377219 | 0.328235  |
| H  | 6.838170  | -0.109810 | -1.788514 | C | -3.527482 | -1.043322 | -0.378514 |
| H  | 7.092876  | 0.824920  | -0.304265 | C | -4.606752 | -1.888645 | -1.067073 |
| H  | 6.496998  | -0.837343 | -0.216869 | C | -4.089534 | -0.282347 | 0.832545  |
| C  | 0.855339  | 1.872793  | -0.927681 | H | -3.144167 | -0.311093 | -1.099728 |
| O  | 0.607818  | 2.947865  | -0.071394 | C | -5.790291 | -1.001801 | -1.487111 |
| Si | -0.659340 | 3.154269  | 1.015148  | H | -4.967954 | -2.664231 | -0.376401 |
| C  | -2.321067 | 3.014610  | 0.134430  | H | -4.173736 | -2.403196 | -1.933104 |
| H  | -2.384208 | 2.048270  | -0.380605 | C | -5.279043 | 0.595152  | 0.416130  |
| H  | -3.154747 | 3.079960  | 0.844994  | H | -4.407396 | -1.008058 | 1.595308  |
| H  | -2.446046 | 3.802681  | -0.617122 | H | -3.291119 | 0.324426  | 1.274258  |
| C  | -0.388603 | 4.893466  | 1.677681  | C | -6.366290 | -0.230681 | -0.288864 |
| H  | -1.171671 | 5.168793  | 2.395128  | H | -6.566717 | -1.616814 | -1.957797 |
| H  | 0.578323  | 4.975454  | 2.187747  | H | -5.449707 | -0.286404 | -2.249524 |
| H  | -0.401185 | 5.627729  | 0.864213  | H | -5.692096 | 1.105130  | 1.294938  |
| C  | -0.592064 | 1.895105  | 2.419531  | H | -4.919173 | 1.381457  | -0.262232 |
| H  | 0.428642  | 1.792104  | 2.806322  | H | -7.185729 | 0.420663  | -0.616681 |
| H  | -1.239923 | 2.207911  | 3.249466  | H | -6.798476 | -0.946349 | 0.426423  |
| H  | -0.916135 | 0.908101  | 2.075022  | C | 1.171247  | -2.250626 | 0.419677  |
| Ni | -0.458109 | 0.204851  | -1.039233 | C | 1.583730  | -1.677733 | 1.783310  |
| H  | 0.451975  | 0.689725  | 0.140208  | C | 1.906312  | -3.559441 | 0.110405  |

|                    |           |           |           |    |           |           |           |
|--------------------|-----------|-----------|-----------|----|-----------|-----------|-----------|
| H                  | 1.434662  | -1.517675 | -0.347542 | C  | -1.528461 | 1.871190  | -1.256469 |
| C                  | 3.100404  | -1.442237 | 1.824571  | O  | -1.176088 | 1.581803  | 0.174114  |
| H                  | 1.285769  | -2.382129 | 2.574636  | Si | -1.056727 | 2.806052  | 1.325279  |
| H                  | 1.040723  | -0.741127 | 1.947268  | C  | 0.179822  | 4.103294  | 0.745590  |
| C                  | 3.425858  | -3.316747 | 0.142664  | H  | -0.154735 | 4.586464  | -0.179804 |
| H                  | 1.645487  | -4.324875 | 0.856140  | H  | 0.343882  | 4.885053  | 1.497749  |
| H                  | 1.591633  | -3.940544 | -0.868974 | H  | 1.137632  | 3.615826  | 0.528187  |
| C                  | 3.875702  | -2.725678 | 1.488920  | C  | -0.437941 | 1.944994  | 2.881103  |
| H                  | 3.392521  | -1.067425 | 2.813353  | H  | -0.172910 | 2.669161  | 3.661136  |
| H                  | 3.358083  | -0.658651 | 1.101760  | H  | -1.198753 | 1.272156  | 3.292186  |
| H                  | 3.956900  | -4.254258 | -0.063352 | H  | 0.453393  | 1.349849  | 2.650754  |
| H                  | 3.689282  | -2.614734 | -0.659898 | C  | -2.757751 | 3.572436  | 1.615614  |
| H                  | 4.953769  | -2.521150 | 1.465524  | H  | -3.478634 | 2.804210  | 1.920501  |
| H                  | 3.712090  | -3.470119 | 2.282861  | H  | -2.723972 | 4.336377  | 2.402780  |
|                    |           |           |           | H  | -3.144213 | 4.050734  | 0.707698  |
| <b>INT2A-NHC-1</b> |           |           |           | Ni | 0.764145  | 0.674003  | -0.760615 |
| C                  | -3.166847 | -1.325798 | -2.600593 | H  | -2.039952 | 2.847126  | -1.246911 |
| C                  | -2.204172 | -0.364216 | -2.298515 | C  | -0.215391 | 1.857689  | -2.022757 |
| C                  | -2.555396 | 0.822291  | -1.641552 | H  | -0.357067 | 1.552925  | -3.066521 |
| C                  | -3.897363 | 1.003979  | -1.288335 | H  | 0.208749  | 2.872149  | -2.037078 |
| C                  | -4.859868 | 0.037225  | -1.583706 | C  | 1.588987  | -0.591495 | 0.454962  |
| C                  | -4.511721 | -1.144113 | -2.249474 | C  | 1.859043  | -2.302152 | 1.930841  |
| H                  | -2.867794 | -2.240676 | -3.108959 | C  | 3.084472  | -2.010486 | 1.421909  |
| H                  | -1.163076 | -0.533707 | -2.554888 | H  | 1.563892  | -3.038861 | 2.660361  |
| H                  | -4.190524 | 1.912159  | -0.765322 | H  | 4.049776  | -2.446299 | 1.624594  |
| H                  | -5.895567 | 0.202769  | -1.293771 | N  | 2.903535  | -0.960048 | 0.533396  |
| C                  | -5.549180 | -2.187656 | -2.592963 | N  | 0.962162  | -1.423355 | 1.342569  |
| H                  | -6.458776 | -2.062794 | -1.995624 | C  | 3.947028  | -0.371130 | -0.313763 |
| H                  | -5.840158 | -2.128374 | -3.650389 | C  | 5.170139  | 0.076752  | 0.498134  |
| H                  | -5.168843 | -3.201571 | -2.420654 | C  | 4.337602  | -1.328414 | -1.450621 |

|   |           |           |           |                   |           |           |           |
|---|-----------|-----------|-----------|-------------------|-----------|-----------|-----------|
| H | 3.477054  | 0.517363  | -0.752543 | H                 | -2.901213 | -3.622626 | 2.419963  |
| C | 6.217813  | 0.721627  | -0.424070 |                   |           |           |           |
| H | 5.620184  | -0.792214 | 0.999321  | <b>TS2A-NHC-2</b> |           |           |           |
| H | 4.853002  | 0.773736  | 1.283092  | C                 | 2.926308  | 2.654252  | 0.164952  |
| C | 5.392942  | -0.687296 | -2.364089 | C                 | 1.834279  | 2.177558  | 0.881340  |
| H | 4.734860  | -2.257633 | -1.016590 | C                 | 0.608487  | 1.875322  | 0.241005  |
| H | 3.436666  | -1.594221 | -2.016421 | C                 | 0.563935  | 2.052400  | -1.158402 |
| C | 6.620943  | -0.227918 | -1.563184 | C                 | 1.668806  | 2.522852  | -1.865829 |
| H | 7.097328  | 1.016119  | 0.161110  | C                 | 2.874461  | 2.837386  | -1.225752 |
| H | 5.800360  | 1.644644  | -0.851790 | H                 | 3.845708  | 2.889968  | 0.698365  |
| H | 5.687193  | -1.394177 | -3.149094 | H                 | 1.931151  | 2.034542  | 1.953300  |
| H | 4.946338  | 0.179790  | -2.872034 | H                 | -0.349884 | 1.805055  | -1.687257 |
| H | 7.345518  | 0.261720  | -2.225305 | H                 | 1.591387  | 2.647277  | -2.944714 |
| H | 7.126046  | -1.108119 | -1.137891 | C                 | 4.084532  | 3.310906  | -1.995203 |
| C | -0.501263 | -1.437033 | 1.511439  | H                 | 4.600931  | 4.126753  | -1.474693 |
| C | -1.163854 | -2.427353 | 0.542304  | H                 | 4.818147  | 2.503187  | -2.129667 |
| C | -0.919091 | -1.706702 | 2.961662  | H                 | 3.810534  | 3.671003  | -2.993015 |
| H | -0.828624 | -0.433005 | 1.232629  | C                 | -0.553822 | 1.369449  | 0.974400  |
| C | -2.691861 | -2.352336 | 0.675522  | O                 | -1.755269 | 1.273268  | 0.233469  |
| H | -0.807108 | -3.444944 | 0.762169  | Si                | -2.871898 | 2.532452  | 0.140473  |
| H | -0.855505 | -2.178212 | -0.478848 | C                 | -3.506975 | 2.533700  | -1.633683 |
| C | -2.448789 | -1.616786 | 3.088669  | H                 | -3.929055 | 1.559681  | -1.904783 |
| H | -0.600427 | -2.714373 | 3.265839  | H                 | -4.290444 | 3.288504  | -1.775287 |
| H | -0.425592 | -0.993093 | 3.631320  | H                 | -2.695274 | 2.755627  | -2.336401 |
| C | -3.143739 | -2.590657 | 2.123710  | C                 | -2.044780 | 4.170472  | 0.566618  |
| H | -3.161782 | -3.076140 | -0.000319 | H                 | -2.736668 | 5.009708  | 0.423571  |
| H | -3.025571 | -1.361147 | 0.344431  | H                 | -1.705702 | 4.185631  | 1.608531  |
| H | -2.748784 | -1.817548 | 4.124565  | H                 | -1.166529 | 4.334483  | -0.067243 |
| H | -2.768819 | -0.590431 | 2.857790  | C                 | -4.297553 | 2.183172  | 1.329349  |
| H | -4.233130 | -2.487199 | 2.203014  | H                 | -5.089582 | 2.937020  | 1.235311  |

|    |           |           |           |                    |           |           |           |
|----|-----------|-----------|-----------|--------------------|-----------|-----------|-----------|
| H  | -4.745292 | 1.202182  | 1.130301  | H                  | -4.919347 | -3.224738 | -1.803266 |
| H  | -3.957835 | 2.186068  | 2.372024  | C                  | 2.752078  | -1.507476 | 0.186416  |
| Ni | -0.078091 | -0.432119 | 1.719830  | C                  | 3.555358  | -2.668247 | 0.791351  |
| C  | -0.649017 | 1.374259  | 2.412577  | C                  | 3.537029  | -0.772487 | -0.909256 |
| H  | 0.068159  | 1.966590  | 2.978208  | H                  | 2.511234  | -0.790333 | 0.978539  |
| H  | -1.654632 | 1.442099  | 2.823273  | C                  | 4.907861  | -2.171200 | 1.324485  |
| H  | -0.309490 | 0.022681  | 3.191496  | H                  | 3.723787  | -3.433109 | 0.018896  |
| C  | 0.258033  | -1.620118 | 0.261564  | H                  | 2.966365  | -3.138047 | 1.588175  |
| C  | 1.257125  | -2.785768 | -1.411209 | C                  | 4.890136  | -0.287604 | -0.368544 |
| C  | -0.084787 | -2.951778 | -1.545811 | H                  | 3.709163  | -1.453702 | -1.755541 |
| H  | 2.075064  | -3.171820 | -1.998270 | H                  | 2.941056  | 0.068581  | -1.276640 |
| H  | -0.654257 | -3.506724 | -2.274315 | C                  | 5.705673  | -1.442744 | 0.231845  |
| N  | -0.678525 | -2.234203 | -0.519740 | H                  | 5.483444  | -3.014172 | 1.725849  |
| N  | 1.447882  | -1.967176 | -0.308963 | H                  | 4.731325  | -1.482338 | 2.163418  |
| C  | -2.124776 | -2.088592 | -0.313563 | H                  | 5.452545  | 0.207425  | -1.169858 |
| C  | -2.790272 | -1.397161 | -1.511436 | H                  | 4.708456  | 0.473676  | 0.401501  |
| C  | -2.784349 | -3.435241 | 0.014404  | H                  | 6.653488  | -1.069358 | 0.639247  |
| H  | -2.215961 | -1.425312 | 0.552432  | H                  | 5.963162  | -2.157783 | -0.563990 |
| C  | -4.295451 | -1.224256 | -1.259588 |                    |           |           |           |
| H  | -2.638042 | -2.000857 | -2.418153 | <b>INT2A-NHC-2</b> |           |           |           |
| H  | -2.306520 | -0.427751 | -1.664904 | C                  | -2.328710 | -2.910846 | 0.873025  |
| C  | -4.288378 | -3.247346 | 0.266184  | C                  | -1.080996 | -2.583621 | 1.374416  |
| H  | -2.637819 | -4.129232 | -0.826282 | C                  | -0.047187 | -2.057276 | 0.531877  |
| H  | -2.291794 | -3.877884 | 0.888404  | C                  | -0.401255 | -1.871764 | -0.843438 |
| C  | -4.973312 | -2.562242 | -0.926394 | C                  | -1.672012 | -2.217465 | -1.322893 |
| H  | -4.770158 | -0.760269 | -2.133075 | C                  | -2.660158 | -2.742944 | -0.489524 |
| H  | -4.434065 | -0.529338 | -0.419763 | H                  | -3.074248 | -3.326878 | 1.549510  |
| H  | -4.757100 | -4.216628 | 0.475110  | H                  | -0.872551 | -2.749539 | 2.426430  |
| H  | -4.425234 | -2.630054 | 1.166049  | H                  | 0.359225  | -1.526955 | -1.535524 |
| H  | -6.038425 | -2.406601 | -0.714481 | H                  | -1.884437 | -2.081857 | -2.382464 |

|    |           |           |           |   |           |          |           |
|----|-----------|-----------|-----------|---|-----------|----------|-----------|
| C  | -4.016132 | -3.156199 | -1.010617 | N | -1.835874 | 2.158674 | -0.256734 |
| H  | -4.833322 | -2.702415 | -0.433873 | C | 1.647424  | 2.771300 | 0.213560  |
| H  | -4.148635 | -2.862174 | -2.057950 | C | 2.356009  | 2.010814 | -0.920592 |
| H  | -4.157899 | -4.244528 | -0.955932 | C | 2.284836  | 4.143350 | 0.451706  |
| C  | 1.204046  | -1.512973 | 1.051030  | H | 1.749685  | 2.174773 | 1.129168  |
| O  | 2.245497  | -1.362678 | 0.071885  | C | 3.849087  | 1.850821 | -0.604451 |
| Si | 3.233396  | -2.568214 | -0.540051 | H | 2.217238  | 2.565708 | -1.860114 |
| C  | 3.648841  | -2.014028 | -2.294595 | H | 1.895621  | 1.024032 | -1.033325 |
| H  | 4.084977  | -1.007734 | -2.287130 | C | 3.776379  | 3.972067 | 0.788263  |
| H  | 4.366760  | -2.688212 | -2.777807 | H | 2.193745  | 4.757361 | -0.455926 |
| H  | 2.745480  | -1.980769 | -2.915370 | H | 1.759909  | 4.670794 | 1.257921  |
| C  | 2.348118  | -4.235095 | -0.550653 | C | 4.517609  | 3.204094 | -0.318125 |
| H  | 2.995717  | -5.025299 | -0.951380 | H | 4.350212  | 1.343329 | -1.437625 |
| H  | 2.044292  | -4.529669 | 0.460579  | H | 3.948959  | 1.188375 | 0.266458  |
| H  | 1.440313  | -4.188841 | -1.162093 | H | 4.235178  | 4.955315 | 0.948095  |
| C  | 4.818730  | -2.673205 | 0.482271  | H | 3.867578  | 3.422882 | 1.736471  |
| H  | 5.527065  | -3.398710 | 0.062120  | H | 5.568308  | 3.060666 | -0.036908 |
| H  | 5.318192  | -1.697153 | 0.516998  | H | 4.517073  | 3.810573 | -1.236260 |
| H  | 4.601850  | -2.972617 | 1.514173  | C | -2.988051 | 1.241569 | -0.202617 |
| Ni | 0.017462  | 0.048436  | 0.763036  | C | -3.574143 | 1.171934 | 1.215421  |
| C  | 1.734599  | -1.934034 | 2.402557  | C | -4.063000 | 1.587973 | -1.236236 |
| H  | 0.975918  | -1.816505 | 3.183155  | H | -2.573526 | 0.256385 | -0.445710 |
| H  | 2.082835  | -2.982132 | 2.431359  | C | -4.706622 | 0.135584 | 1.271320  |
| H  | 2.583514  | -1.296905 | 2.673317  | H | -3.947945 | 2.166721 | 1.499684  |
| C  | -0.609011 | 1.764694  | 0.180798  | H | -2.769807 | 0.906437 | 1.910907  |
| C  | -1.803266 | 3.464075  | -0.725248 | C | -5.183714 | 0.536385 | -1.191064 |
| C  | -0.519525 | 3.895288  | -0.589277 | H | -4.491327 | 2.576586 | -1.014857 |
| H  | -2.671784 | 3.971859  | -1.111334 | H | -3.618784 | 1.640454 | -2.237996 |
| H  | -0.072943 | 4.844653  | -0.835411 | C | -5.787992 | 0.422607 | 0.217817  |
| N  | 0.193926  | 2.848215  | -0.024929 | H | -5.146676 | 0.117154 | 2.275841  |

|                   |           |           |           |    |           |           |           |
|-------------------|-----------|-----------|-----------|----|-----------|-----------|-----------|
| H                 | -4.274617 | -0.858044 | 1.094608  | H  | 0.785102  | 0.774666  | 3.284519  |
| H                 | -5.960787 | 0.789942  | -1.922363 | H  | -0.862569 | 0.635861  | 2.644573  |
| H                 | -4.769401 | -0.435432 | -1.489107 | C  | 1.854707  | -2.324972 | 3.099353  |
| H                 | -6.553315 | -0.363427 | 0.235937  | H  | 2.752307  | -1.694950 | 3.091408  |
| H                 | -6.297884 | 1.365149  | 0.467623  | H  | 1.608468  | -2.553841 | 4.144095  |
|                   |           |           |           | H  | 2.114939  | -3.270944 | 2.607595  |
| <b>TS3A-NHC-1</b> |           |           |           | Ni | -0.536396 | -0.669769 | -0.806608 |
| C                 | 4.333819  | -0.219135 | -1.846241 | H  | 1.409325  | -3.133338 | 0.148969  |
| C                 | 3.042513  | -0.684014 | -1.625220 | C  | 0.451106  | -2.291982 | -1.592619 |
| C                 | 2.811263  | -1.788625 | -0.789287 | H  | 0.802410  | -2.026787 | -2.591405 |
| C                 | 3.912028  | -2.394365 | -0.173928 | H  | -0.232783 | -3.144227 | -1.592592 |
| C                 | 5.208004  | -1.927712 | -0.401914 | C  | -1.568096 | 0.868246  | -0.256738 |
| C                 | 5.442793  | -0.834610 | -1.242234 | C  | -2.095092 | 2.936980  | 0.528861  |
| H                 | 4.488542  | 0.644977  | -2.489333 | C  | -3.262549 | 2.303857  | 0.241506  |
| H                 | 2.192640  | -0.179605 | -2.076026 | H  | -1.917116 | 3.923344  | 0.924427  |
| H                 | 3.754115  | -3.237454 | 0.494517  | H  | -4.284255 | 2.634071  | 0.342387  |
| H                 | 6.047632  | -2.417813 | 0.086240  | N  | -2.922344 | 1.046540  | -0.237822 |
| C                 | 6.841917  | -0.331115 | -1.508586 | N  | -1.074265 | 2.047375  | 0.229291  |
| H                 | 6.887895  | 0.763713  | -1.466905 | C  | -3.875219 | -0.004688 | -0.608550 |
| H                 | 7.557953  | -0.726786 | -0.780570 | C  | -4.674437 | -0.489170 | 0.610886  |
| H                 | 7.188536  | -0.629326 | -2.507250 | C  | -4.797241 | 0.438190  | -1.752652 |
| C                 | 1.442057  | -2.307317 | -0.558573 | H  | -3.246999 | -0.831235 | -0.961599 |
| O                 | 0.885554  | -1.013109 | 0.683296  | C  | -5.632830 | -1.622703 | 0.214380  |
| Si                | 0.423479  | -1.457745 | 2.213239  | H  | -5.249090 | 0.352181  | 1.024942  |
| C                 | -1.068764 | -2.624474 | 2.135774  | H  | -3.976998 | -0.817902 | 1.390438  |
| H                 | -0.822318 | -3.549792 | 1.599875  | C  | -5.752944 | -0.699972 | -2.144696 |
| H                 | -1.447589 | -2.900772 | 3.128032  | H  | -5.383562 | 1.312125  | -1.433565 |
| H                 | -1.876772 | -2.134529 | 1.577692  | H  | -4.188497 | 0.754043  | -2.608282 |
| C                 | -0.069254 | 0.095881  | 3.174296  | C  | -6.559690 | -1.196043 | -0.934305 |
| H                 | -0.436062 | -0.148685 | 4.179363  | H  | -6.218997 | -1.938094 | 1.085888  |



|                    |           |           |           |    |           |           |           |
|--------------------|-----------|-----------|-----------|----|-----------|-----------|-----------|
| H                  | -5.042720 | -2.495729 | -0.100407 | H  | -2.670466 | -0.205387 | -2.293261 |
| H                  | -6.424889 | -0.364472 | -2.943832 | H  | -2.128086 | 0.762448  | -3.667818 |
| H                  | -5.166384 | -1.534504 | -2.555910 | C  | -3.646561 | 2.146486  | -0.210818 |
| H                  | -7.209472 | -2.029669 | -1.227734 | H  | -3.455152 | 2.942665  | 0.519358  |
| H                  | -7.220731 | -0.388573 | -0.585351 | H  | -3.599219 | 1.192768  | 0.330851  |
| C                  | 0.375791  | 2.296471  | 0.339970  | O  | -0.839760 | 2.051295  | -1.058661 |
| C                  | 0.962884  | 2.726357  | -1.013170 | H  | -3.832412 | 0.809964  | -3.170511 |
| C                  | 0.709855  | 3.308830  | 1.440427  | H  | -1.876801 | 3.876152  | -3.399968 |
| H                  | 0.810419  | 1.327851  | 0.605605  | H  | -4.672487 | 2.269300  | -0.582371 |
| C                  | 2.483686  | 2.912713  | -0.901083 | Si | 1.260946  | 2.059402  | 1.788485  |
| H                  | 0.483698  | 3.662846  | -1.334927 | H  | 1.094303  | 0.830932  | 0.914031  |
| H                  | 0.716299  | 1.957227  | -1.755246 | C  | 2.120165  | 1.355581  | 3.331415  |
| C                  | 2.234594  | 3.459814  | 1.560733  | H  | 1.365248  | 0.881621  | 3.973415  |
| H                  | 0.279220  | 4.290552  | 1.194035  | H  | 2.539703  | 2.185098  | 3.918988  |
| H                  | 0.271291  | 2.986525  | 2.391532  | C  | 3.225429  | 0.337190  | 2.993690  |
| C                  | 2.853908  | 3.892944  | 0.222387  | H  | 3.734589  | -0.029872 | 3.893540  |
| H                  | 2.889721  | 3.256836  | -1.860778 | H  | 2.808603  | -0.532249 | 2.470533  |
| H                  | 2.943958  | 1.938342  | -0.694688 | H  | 3.993020  | 0.773041  | 2.340649  |
| H                  | 2.475660  | 4.183610  | 2.348831  | C  | 2.397042  | 3.232945  | 0.826748  |
| H                  | 2.667221  | 2.497261  | 1.868648  | H  | 3.438288  | 3.031594  | 1.117711  |
| H                  | 3.944537  | 3.966880  | 0.316373  | H  | 2.187285  | 4.261692  | 1.153364  |
| H                  | 2.489254  | 4.899252  | -0.033217 | C  | 2.239720  | 3.123793  | -0.703014 |
|                    |           |           |           | H  | 1.202057  | 3.277637  | -1.014280 |
|                    |           |           |           | H  | 2.883358  | 3.843766  | -1.224354 |
| <b>INT3A-NHC-1</b> |           |           |           | H  | 2.509668  | 2.117999  | -1.048963 |
| Ni                 | -0.083224 | 0.480370  | -0.420404 | C  | -0.452282 | 2.761402  | 2.145978  |
| Si                 | -2.366258 | 2.190716  | -1.619076 | H  | -0.371716 | 3.607063  | 2.843899  |
| C                  | -2.576653 | 3.823245  | -2.556752 | H  | -0.817691 | 3.149821  | 1.188016  |
| H                  | -2.369219 | 4.679353  | -1.902391 | C  | -1.447211 | 1.713541  | 2.677406  |
| H                  | -3.593021 | 3.942987  | -2.954101 | H  | -1.115301 | 1.267714  | 3.623855  |
| C                  | -2.799939 | 0.760753  | -2.799892 |    |           |           |           |

|   |           |           |           |                   |           |           |           |
|---|-----------|-----------|-----------|-------------------|-----------|-----------|-----------|
| H | -2.438887 | 2.149869  | 2.845268  | C                 | -4.522338 | -2.339276 | -0.443534 |
| H | -1.568246 | 0.903801  | 1.946872  | H                 | -2.983950 | -3.866908 | -0.490610 |
| C | 0.236262  | -1.400385 | -0.220720 | H                 | -2.777723 | -2.619178 | -1.726603 |
| C | -0.152905 | -3.617430 | 0.096534  | C                 | -3.955685 | -1.759430 | 1.961984  |
| C | 1.184272  | -3.463172 | -0.092982 | H                 | -2.374600 | -3.248908 | 2.004845  |
| H | -0.737496 | -4.503904 | 0.284588  | H                 | -1.811099 | -1.606288 | 2.339251  |
| H | 1.975705  | -4.194385 | -0.105831 | C                 | -4.923687 | -2.505905 | 1.030650  |
| N | 1.405760  | -2.104455 | -0.275344 | H                 | -5.199338 | -2.907027 | -1.092882 |
| N | -0.714969 | -2.351909 | 0.011503  | H                 | -4.619858 | -1.283158 | -0.732130 |
| C | 2.686489  | -1.438656 | -0.561908 | H                 | -4.226429 | -1.924635 | 3.011789  |
| C | 3.889998  | -2.210902 | -0.013300 | H                 | -4.039248 | -0.678303 | 1.781861  |
| C | 2.834162  | -1.148067 | -2.063508 | H                 | -5.948875 | -2.148318 | 1.185765  |
| H | 2.627651  | -0.478176 | -0.039278 | H                 | -4.919830 | -3.575887 | 1.287423  |
| C | 5.181168  | -1.417927 | -0.273415 |                   |           |           |           |
| H | 3.967638  | -3.186894 | -0.513236 | <b>TS4A-NHC-1</b> |           |           |           |
| H | 3.757678  | -2.401779 | 1.058750  | Ni                | 0.050628  | 0.173650  | -0.172843 |
| C | 4.136542  | -0.381584 | -2.339405 | Si                | 1.723934  | 2.618178  | 0.613899  |
| H | 2.828660  | -2.100625 | -2.612901 | C                 | 1.755800  | 4.414590  | 1.184895  |
| H | 1.962234  | -0.569830 | -2.391259 | H                 | 1.550648  | 5.109115  | 0.363663  |
| C | 5.358762  | -1.118723 | -1.770486 | H                 | 2.744328  | 4.659451  | 1.594989  |
| H | 6.042803  | -1.975061 | 0.113355  | C                 | 2.223581  | 1.508963  | 2.067876  |
| H | 5.139397  | -0.472239 | 0.286335  | H                 | 2.090564  | 0.448763  | 1.815634  |
| H | 4.251686  | -0.218762 | -3.417490 | H                 | 1.594581  | 1.710567  | 2.942610  |
| H | 4.068531  | 0.614124  | -1.878619 | C                 | 2.963516  | 2.366418  | -0.794528 |
| H | 6.268717  | -0.528000 | -1.932279 | H                 | 2.764406  | 3.052391  | -1.626254 |
| H | 5.496761  | -2.066255 | -2.312200 | H                 | 2.881266  | 1.346022  | -1.189798 |
| C | -2.125347 | -2.016686 | 0.244250  | O                 | 0.229331  | 2.112013  | 0.083853  |
| C | -3.071444 | -2.787730 | -0.683885 | H                 | 3.271518  | 1.658456  | 2.357746  |
| C | -2.501518 | -2.193534 | 1.722243  | H                 | 1.014947  | 4.595730  | 1.972412  |
| H | -2.195886 | -0.950371 | 0.001107  | H                 | 3.999162  | 2.523206  | -0.466635 |

|    |           |           |           |   |           |           |           |
|----|-----------|-----------|-----------|---|-----------|-----------|-----------|
| Si | -1.622823 | 2.386032  | -0.376001 | C | -2.179791 | -2.314513 | -0.043467 |
| H  | -1.392995 | 0.798166  | -0.748225 | C | -3.069524 | -3.295681 | -0.815487 |
| C  | -3.036150 | 2.277762  | -1.724561 | C | -2.624970 | -2.166771 | 1.419286  |
| H  | -2.608095 | 2.572087  | -2.695184 | H | -2.245349 | -1.331990 | -0.519806 |
| H  | -3.767419 | 3.063601  | -1.478670 | C | -4.537915 | -2.844664 | -0.743961 |
| C  | -3.749466 | 0.931248  | -1.877345 | H | -2.988091 | -4.302034 | -0.379649 |
| H  | -4.546698 | 0.958249  | -2.633363 | H | -2.730401 | -3.363386 | -1.856411 |
| H  | -3.042290 | 0.145199  | -2.172779 | C | -4.099244 | -1.742974 | 1.497382  |
| H  | -4.210240 | 0.611016  | -0.932956 | H | -2.479690 | -3.125999 | 1.938048  |
| C  | -2.507166 | 2.192101  | 1.303887  | H | -1.980167 | -1.426483 | 1.907030  |
| H  | -3.262413 | 1.403363  | 1.180619  | C | -5.005273 | -2.704851 | 0.713326  |
| H  | -3.068656 | 3.118425  | 1.495602  | H | -5.170676 | -3.559586 | -1.283651 |
| C  | -1.622188 | 1.860897  | 2.514150  | H | -4.642255 | -1.878199 | -1.255174 |
| H  | -0.888399 | 2.653392  | 2.703352  | H | -4.414417 | -1.683997 | 2.546065  |
| H  | -2.210896 | 1.727676  | 3.431918  | H | -4.200305 | -0.731322 | 1.081909  |
| H  | -1.052717 | 0.939171  | 2.339978  | H | -6.045095 | -2.357254 | 0.744995  |
| C  | -1.247833 | 4.260365  | -0.650147 | H | -4.987271 | -3.694453 | 1.194389  |
| H  | -2.219153 | 4.769767  | -0.733294 | C | 2.719887  | -1.837109 | -0.220949 |
| H  | -0.770285 | 4.662865  | 0.251300  | C | 3.569361  | -2.135028 | 1.022716  |
| C  | -0.397736 | 4.606613  | -1.883431 | C | 3.447310  | -2.228335 | -1.515097 |
| H  | -0.884719 | 4.277468  | -2.810145 | H | 2.528319  | -0.758935 | -0.253240 |
| H  | -0.219166 | 5.686687  | -1.978533 | C | 4.923560  | -1.414055 | 0.926325  |
| H  | 0.581482  | 4.115301  | -1.845206 | H | 3.733557  | -3.219363 | 1.101881  |
| C  | 0.230099  | -1.726650 | -0.172786 | H | 3.022862  | -1.824555 | 1.920994  |
| C  | 1.132872  | -3.810539 | -0.061926 | C | 4.803584  | -1.511269 | -1.605493 |
| C  | -0.218829 | -3.949135 | -0.042148 | H | 3.601731  | -3.316954 | -1.529900 |
| H  | 1.916617  | -4.550863 | -0.035811 | H | 2.812849  | -1.979395 | -2.373937 |
| H  | -0.828819 | -4.836101 | 0.011335  | C | 5.667234  | -1.788731 | -0.365047 |
| N  | -0.753593 | -2.671856 | -0.121188 | H | 5.534223  | -1.651333 | 1.805557  |
| N  | 1.389745  | -2.449747 | -0.141246 | H | 4.750754  | -0.328405 | 0.946189  |

|                  |           |           |           |    |           |           |           |
|------------------|-----------|-----------|-----------|----|-----------|-----------|-----------|
| H                | 5.328366  | -1.819609 | -2.517459 | C  | 2.037762  | -2.130360 | -0.239047 |
| H                | 4.630470  | -0.428887 | -1.691325 | C  | 2.511398  | -1.807107 | 1.186471  |
| H                | 6.612987  | -1.237288 | -0.430499 | C  | 2.842894  | -3.279024 | -0.856650 |
| H                | 5.925900  | -2.857688 | -0.335915 | H  | 2.180060  | -1.234403 | -0.855426 |
|                  |           |           |           | C  | 4.010828  | -1.475320 | 1.195032  |
| <b>INT1B-NHC</b> |           |           |           | H  | 2.308185  | -2.671754 | 1.834789  |
| C                | -0.309756 | -1.351536 | -0.364545 | H  | 1.922772  | -0.964058 | 1.567874  |
| C                | -0.056591 | -3.589680 | -0.080376 | C  | 4.340657  | -2.929150 | -0.857894 |
| C                | -1.391254 | -3.327420 | -0.083595 | H  | 2.696325  | -4.194938 | -0.266649 |
| H                | 0.469348  | -4.525477 | 0.015748  | H  | 2.484847  | -3.483876 | -1.872877 |
| H                | -2.232582 | -3.994626 | 0.009899  | C  | 4.838787  | -2.602842 | 0.559086  |
| N                | -1.525688 | -1.960176 | -0.270583 | H  | 4.343537  | -1.283485 | 2.221782  |
| N                | 0.585440  | -2.375176 | -0.265449 | H  | 4.171685  | -0.542853 | 0.635943  |
| C                | -2.780967 | -1.190264 | -0.250122 | H  | 4.913815  | -3.760211 | -1.285845 |
| C                | -3.933985 | -1.927694 | -0.940983 | H  | 4.506692  | -2.061173 | -1.511941 |
| C                | -3.144930 | -0.778731 | 1.185156  | H  | 5.899779  | -2.326597 | 0.531712  |
| H                | -2.556918 | -0.280418 | -0.819840 | H  | 4.762959  | -3.505550 | 1.183428  |
| C                | -5.199752 | -1.054359 | -0.934688 | Ni | 0.087044  | 0.581582  | -0.363993 |
| H                | -4.151188 | -2.863522 | -0.406698 | Si | 0.563455  | 2.838506  | -0.199073 |
| H                | -3.645189 | -2.196439 | -1.964294 | C  | 1.609270  | 3.232896  | 1.376084  |
| C                | -4.423530 | 0.072563  | 1.199170  | H  | 1.005169  | 2.987191  | 2.261905  |
| H                | -3.286606 | -1.685597 | 1.790858  | H  | 1.798915  | 4.315264  | 1.432406  |
| H                | -2.301745 | -0.224153 | 1.614646  | C  | -1.007205 | 3.947266  | -0.036762 |
| C                | -5.585639 | -0.644504 | 0.495276  | H  | -1.501805 | 3.986424  | -1.019031 |
| H                | -6.023301 | -1.594515 | -1.416707 | H  | -0.708033 | 4.980462  | 0.194134  |
| H                | -5.018559 | -0.152322 | -1.536527 | C  | 1.561661  | 3.573234  | -1.678693 |
| H                | -4.691923 | 0.321707  | 2.232500  | H  | 2.469248  | 2.966218  | -1.814995 |
| H                | -4.223013 | 1.025682  | 0.690621  | H  | 0.968046  | 3.417347  | -2.591824 |
| H                | -6.473882 | -0.001500 | 0.477495  | C  | 2.942518  | 2.470678  | 1.442859  |
| H                | -5.857938 | -1.544508 | 1.066626  | H  | 3.585017  | 2.714551  | 0.586495  |

|                   |           |           |           |    |           |           |           |
|-------------------|-----------|-----------|-----------|----|-----------|-----------|-----------|
| H                 | 3.515034  | 2.693860  | 2.354038  | H  | -2.823528 | -3.375380 | -2.465906 |
| H                 | 2.772945  | 1.385626  | 1.416259  | H  | -1.224603 | -3.104672 | -3.166176 |
| C                 | 1.949039  | 5.057423  | -1.559989 | H  | -1.886864 | -4.753739 | -3.084378 |
| H                 | 2.506863  | 5.413453  | -2.437694 | C  | -1.988377 | -5.298758 | 0.154339  |
| H                 | 1.062423  | 5.695434  | -1.456903 | H  | -1.932763 | -6.293622 | -0.304722 |
| H                 | 2.579538  | 5.236516  | -0.680149 | H  | -1.581700 | -5.372875 | 1.169961  |
| C                 | -2.009689 | 3.455009  | 1.019547  | H  | -3.046811 | -5.025507 | 0.240441  |
| H                 | -1.559242 | 3.434277  | 2.020519  | C  | 0.765647  | -4.547207 | -0.979540 |
| H                 | -2.907940 | 4.085688  | 1.079450  | H  | 1.252358  | -4.474200 | 0.001003  |
| H                 | -2.336287 | 2.429900  | 0.797318  | H  | 0.845895  | -5.588653 | -1.316769 |
|                   |           |           |           | H  | 1.328323  | -3.923225 | -1.681876 |
| <b>TS2B-NHC-1</b> |           |           |           | Ni | 0.468664  | 0.275623  | -0.121871 |
| C                 | -4.919718 | -0.843144 | -0.628179 | C  | -0.132846 | -0.983189 | -1.450080 |
| C                 | -3.663359 | -1.396459 | -0.369392 | H  | 0.594538  | -1.788743 | -1.577152 |
| C                 | -2.489832 | -0.668825 | -0.603853 | H  | -0.581294 | -0.696962 | -2.404627 |
| C                 | -2.629487 | 0.636442  | -1.110328 | Si | -0.660308 | -0.762719 | 1.777121  |
| C                 | -3.883086 | 1.184579  | -1.364068 | C  | -0.617673 | 1.014521  | 2.545291  |
| C                 | -5.057654 | 0.454427  | -1.130638 | C  | -1.879715 | 1.852289  | 2.278357  |
| H                 | -5.810470 | -1.436811 | -0.431262 | H  | 0.277712  | 1.564639  | 2.234867  |
| H                 | -3.590109 | -2.398589 | 0.036701  | H  | -0.503126 | 0.861108  | 3.629628  |
| H                 | -1.737833 | 1.227334  | -1.299765 | H  | -1.821112 | 2.840304  | 2.755370  |
| H                 | -3.950554 | 2.199140  | -1.753281 | H  | -2.042565 | 2.005860  | 1.205910  |
| C                 | -6.414740 | 1.042000  | -1.439841 | H  | -2.779399 | 1.356550  | 2.660916  |
| H                 | -7.209944 | 0.528451  | -0.888484 | C  | -2.186552 | -1.543848 | 2.621338  |
| H                 | -6.460033 | 2.106903  | -1.182792 | C  | -2.158071 | -1.430943 | 4.156769  |
| H                 | -6.652140 | 0.958445  | -2.509335 | H  | -2.226197 | -2.595943 | 2.324125  |
| C                 | -1.115978 | -1.247601 | -0.338340 | H  | -3.102902 | -1.082658 | 2.235392  |
| O                 | -1.193032 | -2.623735 | 0.087174  | H  | -2.992799 | -1.980288 | 4.611348  |
| Si                | -1.043274 | -4.013336 | -0.850604 | H  | -1.232454 | -1.841946 | 4.581157  |
| C                 | -1.815004 | -3.794664 | -2.555208 | H  | -2.236135 | -0.390081 | 4.492327  |

|   |          |           |           |                    |           |           |           |
|---|----------|-----------|-----------|--------------------|-----------|-----------|-----------|
| C | 0.891104 | -1.762879 | 2.295547  | H                  | 6.285029  | -1.919528 | -1.598754 |
| C | 1.996507 | -0.942678 | 2.980307  | C                  | 0.616179  | 3.603350  | -0.145383 |
| H | 1.279594 | -2.234560 | 1.384046  | C                  | 0.717043  | 4.942198  | 0.591434  |
| H | 0.572295 | -2.587585 | 2.948630  | C                  | 0.029346  | 3.768448  | -1.555111 |
| H | 2.892180 | -1.547217 | 3.178039  | H                  | -0.057840 | 2.951431  | 0.417916  |
| H | 2.297819 | -0.092014 | 2.357638  | C                  | -0.672946 | 5.595208  | 0.674986  |
| H | 1.658058 | -0.534051 | 3.940055  | H                  | 1.398473  | 5.616498  | 0.052865  |
| C | 1.927259 | 1.509017  | -0.098592 | H                  | 1.136871  | 4.785285  | 1.592478  |
| C | 3.154214 | 3.398550  | -0.392473 | C                  | -1.357116 | 4.426240  | -1.473318 |
| C | 4.013063 | 2.343440  | -0.428004 | H                  | 0.707804  | 4.386386  | -2.161035 |
| H | 3.342602 | 4.456461  | -0.479997 | H                  | -0.024613 | 2.779527  | -2.025745 |
| H | 5.083559 | 2.318071  | -0.553950 | C                  | -1.297280 | 5.764749  | -0.719520 |
| N | 3.251427 | 1.202340  | -0.230783 | H                  | -0.599154 | 6.564349  | 1.182746  |
| N | 1.889400 | 2.872501  | -0.175801 | H                  | -1.327127 | 4.962795  | 1.291751  |
| C | 3.713183 | -0.191229 | -0.297042 | H                  | -1.764380 | 4.569439  | -2.481382 |
| C | 3.753942 | -0.685361 | -1.749965 | H                  | -2.043357 | 3.744714  | -0.949783 |
| C | 5.045147 | -0.410478 | 0.426795  | H                  | -2.301573 | 6.197219  | -0.633019 |
| H | 2.936389 | -0.759231 | 0.224908  | H                  | -0.694325 | 6.478937  | -1.299844 |
| C | 4.143544 | -2.170212 | -1.792040 |                    |           |           |           |
| H | 4.482533 | -0.086264 | -2.315814 | <b>INT2B-NHC-1</b> |           |           |           |
| H | 2.764911 | -0.523607 | -2.193062 | C                  | 2.936632  | 4.433909  | 0.087694  |
| C | 5.420322 | -1.901528 | 0.384237  | C                  | 2.907096  | 3.069141  | -0.216869 |
| H | 5.839390 | 0.172511  | -0.061461 | C                  | 1.698806  | 2.370575  | -0.296103 |
| H | 4.967665 | -0.055847 | 1.461633  | C                  | 0.513954  | 3.097306  | -0.066644 |
| C | 5.470131 | -2.425809 | -1.060008 | C                  | 0.545296  | 4.451563  | 0.242996  |
| H | 4.205462 | -2.512817 | -2.832003 | C                  | 1.761512  | 5.149409  | 0.328754  |
| H | 3.348281 | -2.759310 | -1.313944 | H                  | 3.895554  | 4.944585  | 0.148076  |
| H | 6.383543 | -2.057586 | 0.884763  | H                  | 3.847625  | 2.554984  | -0.385557 |
| H | 4.672007 | -2.472568 | 0.952897  | H                  | -0.434514 | 2.570223  | -0.130284 |
| H | 5.707247 | -3.496841 | -1.064205 | H                  | -0.388004 | 4.982451  | 0.424329  |

|    |           |           |           |   |           |           |           |
|----|-----------|-----------|-----------|---|-----------|-----------|-----------|
| C  | 1.784558  | 6.624670  | 0.653769  | H | 5.748748  | -1.198219 | -2.271251 |
| H  | 1.142870  | 6.855816  | 1.512788  | C | 4.337717  | -0.003451 | 0.764840  |
| H  | 2.797212  | 6.969176  | 0.888749  | C | 5.196381  | -1.239623 | 1.092630  |
| H  | 1.419311  | 7.224896  | -0.190384 | H | 3.738159  | 0.254107  | 1.644393  |
| C  | 1.595144  | 0.899251  | -0.637334 | H | 4.995478  | 0.861235  | 0.602426  |
| O  | 0.740327  | 0.234502  | 0.467289  | H | 5.822809  | -1.071576 | 1.978211  |
| Si | 0.706246  | 0.311881  | 2.151610  | H | 4.571919  | -2.117769 | 1.296336  |
| C  | -1.108128 | 0.457390  | 2.645883  | H | 5.865190  | -1.501308 | 0.264830  |
| H  | -1.543557 | 1.347454  | 2.177332  | C | 2.540592  | -1.980496 | -0.860034 |
| H  | -1.693658 | -0.408180 | 2.321999  | C | 3.467498  | -2.973391 | -1.583270 |
| H  | -1.212251 | 0.558481  | 3.733749  | H | 1.566805  | -1.935010 | -1.365176 |
| C  | 1.628623  | 1.779549  | 2.897642  | H | 2.327156  | -2.336522 | 0.157070  |
| H  | 1.657689  | 1.665519  | 3.989577  | H | 3.025785  | -3.977010 | -1.641454 |
| H  | 2.657375  | 1.875103  | 2.540129  | H | 3.672912  | -2.650642 | -2.610673 |
| H  | 1.120467  | 2.720485  | 2.663999  | H | 4.433018  | -3.076141 | -1.074909 |
| C  | 1.406673  | -1.307332 | 2.832022  | C | -2.339592 | -1.024894 | -0.224107 |
| H  | 2.475394  | -1.417379 | 2.618630  | C | -3.653125 | -2.579323 | 0.797953  |
| H  | 1.272785  | -1.370113 | 3.919540  | C | -4.423519 | -1.483421 | 0.568761  |
| H  | 0.892120  | -2.163191 | 2.382425  | H | -3.898712 | -3.521450 | 1.260801  |
| Ni | -0.805168 | -0.151308 | -1.031659 | H | -5.460025 | -1.293138 | 0.798315  |
| C  | 0.766171  | 0.687763  | -1.910943 | N | -3.607876 | -0.548786 | -0.052513 |
| H  | 0.592161  | 1.634979  | -2.433558 | N | -2.385868 | -2.279695 | 0.318632  |
| H  | 1.247618  | 0.007006  | -2.627665 | C | -4.018869 | 0.796374  | -0.470591 |
| Si | 3.176071  | -0.186476 | -0.745705 | C | -5.063867 | 0.742265  | -1.594114 |
| C  | 4.132007  | 0.285521  | -2.328543 | C | -4.506392 | 1.639126  | 0.716687  |
| C  | 5.619025  | -0.113064 | -2.355685 | H | -3.100649 | 1.247466  | -0.865635 |
| H  | 4.036784  | 1.370280  | -2.471887 | C | -5.434220 | 2.160708  | -2.054857 |
| H  | 3.611799  | -0.164442 | -3.184121 | H | -5.964047 | 0.225955  | -1.229344 |
| H  | 6.104245  | 0.201818  | -3.288418 | H | -4.666764 | 0.150382  | -2.427486 |
| H  | 6.175273  | 0.344975  | -1.528953 | C | -4.868494 | 3.057553  | 0.249698  |

|                   |           |           |           |    |           |           |           |
|-------------------|-----------|-----------|-----------|----|-----------|-----------|-----------|
| H                 | -5.391748 | 1.165239  | 1.165282  | C  | -1.312599 | -1.580944 | -0.751299 |
| H                 | -3.729663 | 1.663215  | 1.489013  | C  | -1.873081 | -1.411397 | -2.042978 |
| C                 | -5.911937 | 3.025983  | -0.878139 | C  | -3.232106 | -1.586961 | -2.274061 |
| H                 | -6.204564 | 2.111151  | -2.833764 | C  | -4.119333 | -1.947304 | -1.245296 |
| H                 | -4.551395 | 2.628430  | -2.514268 | H  | -4.228398 | -2.391600 | 0.859741  |
| H                 | -5.236470 | 3.647465  | 1.097784  | H  | -1.846650 | -2.065439 | 1.296172  |
| H                 | -3.958375 | 3.558370  | -0.111784 | H  | -1.216884 | -1.115110 | -2.854653 |
| H                 | -6.131541 | 4.044546  | -1.220884 | H  | -3.620025 | -1.441195 | -3.281355 |
| H                 | -6.854181 | 2.614740  | -0.486013 | C  | -5.589167 | -2.168443 | -1.515346 |
| C                 | -1.235496 | -3.193876 | 0.257091  | H  | -6.185853 | -2.053569 | -0.602935 |
| C                 | -1.108473 | -4.069075 | 1.509551  | H  | -5.974407 | -1.456678 | -2.255763 |
| C                 | -1.284730 | -4.042016 | -1.022638 | H  | -5.785838 | -3.176819 | -1.906810 |
| H                 | -0.360990 | -2.537123 | 0.199059  | C  | 0.099432  | -1.297436 | -0.504965 |
| C                 | 0.147129  | -4.951227 | 1.407312  | O  | 0.931742  | -1.338762 | -1.659726 |
| H                 | -1.989888 | -4.719346 | 1.604426  | Si | 1.586039  | -2.704464 | -2.379285 |
| H                 | -1.075280 | -3.436848 | 2.404890  | C  | 1.560107  | -2.362686 | -4.232134 |
| C                 | -0.047895 | -4.946693 | -1.120929 | H  | 2.061195  | -1.412582 | -4.454211 |
| H                 | -2.201106 | -4.650266 | -1.012579 | H  | 2.068492  | -3.151614 | -4.800126 |
| H                 | -1.345430 | -3.367133 | -1.884375 | H  | 0.529708  | -2.290088 | -4.599284 |
| C                 | 0.118519  | -5.814295 | 0.136188  | C  | 0.584463  | -4.240417 | -1.937338 |
| H                 | 0.231075  | -5.581765 | 2.300565  | H  | 0.979063  | -5.132639 | -2.439603 |
| H                 | 1.039078  | -4.309235 | 1.388959  | H  | 0.606790  | -4.425435 | -0.856789 |
| H                 | -0.114544 | -5.575859 | -2.016671 | H  | -0.464522 | -4.114958 | -2.226669 |
| H                 | 0.840841  | -4.314457 | -1.243479 | C  | 3.379566  | -2.903925 | -1.809987 |
| H                 | 1.035319  | -6.412441 | 0.065741  | H  | 3.901232  | -3.677583 | -2.387893 |
| H                 | -0.718938 | -6.524946 | 0.201771  | H  | 3.927567  | -1.962157 | -1.938058 |
|                   |           |           |           | H  | 3.443151  | -3.183576 | -0.751217 |
| <b>TS2B-NHC-2</b> |           |           |           | Ni | 0.186758  | 0.296379  | 0.519986  |
| C                 | -3.573650 | -2.114452 | 0.034727  | C  | 0.754986  | -1.854033 | 0.774195  |
| C                 | -2.213835 | -1.939463 | 0.282312  | H  | 0.217889  | -2.748061 | 1.129394  |



|    |           |           |           |   |           |          |           |
|----|-----------|-----------|-----------|---|-----------|----------|-----------|
| H  | 1.768930  | -2.166492 | 0.509433  | C | 2.167227  | 2.591025 | -0.721629 |
| Si | 1.183358  | -1.045344 | 2.534458  | C | 2.414645  | 1.703510 | -1.953108 |
| C  | 1.760416  | -2.613489 | 3.459270  | C | 3.086559  | 3.815805 | -0.713506 |
| H  | 2.047445  | -2.302196 | 4.472783  | H | 2.376575  | 1.991130 | 0.170308  |
| H  | 0.897250  | -3.282397 | 3.588539  | C | 3.881713  | 1.255092 | -1.995331 |
| C  | 2.661618  | 0.167487  | 2.491821  | H | 2.169297  | 2.278612 | -2.858476 |
| H  | 3.304333  | -0.100721 | 1.641308  | H | 1.748828  | 0.835704 | -1.911911 |
| H  | 2.268178  | 1.166075  | 2.260295  | C | 4.556499  | 3.360759 | -0.748135 |
| C  | -0.282649 | -0.308752 | 3.517930  | H | 2.886658  | 4.438813 | -1.596965 |
| H  | -0.322223 | 0.765251  | 3.291656  | H | 2.888412  | 4.432381 | 0.172150  |
| H  | -1.217322 | -0.722802 | 3.116947  | C | 4.839549  | 2.455898 | -1.959387 |
| C  | 2.922125  | -3.386234 | 2.810077  | H | 4.060447  | 0.645346 | -2.889620 |
| H  | 3.258444  | -4.217787 | 3.441909  | H | 4.077732  | 0.603976 | -1.130185 |
| H  | 2.631944  | -3.813131 | 1.843034  | H | 5.216561  | 4.236626 | -0.760015 |
| H  | 3.790782  | -2.739490 | 2.633265  | H | 4.780915  | 2.809186 | 0.176542  |
| C  | 3.501799  | 0.232418  | 3.782894  | H | 5.882873  | 2.116809 | -1.939417 |
| H  | 3.965527  | -0.733147 | 4.014068  | H | 4.715522  | 3.042356 | -2.881899 |
| H  | 4.308297  | 0.971819  | 3.698566  | C | -2.635518 | 1.924417 | 0.006253  |
| H  | 2.890241  | 0.516078  | 4.647928  | C | -2.916621 | 2.044029 | 1.510874  |
| C  | -0.234050 | -0.515677 | 5.044685  | C | -3.830013 | 2.407708 | -0.821490 |
| H  | -1.086914 | -0.033599 | 5.538763  | H | -2.461663 | 0.869049 | -0.227733 |
| H  | -0.259797 | -1.579147 | 5.307440  | C | -4.165588 | 1.232400 | 1.883593  |
| H  | 0.678264  | -0.093637 | 5.483087  | H | -3.056188 | 3.104677 | 1.767580  |
| C  | -0.159009 | 2.054135  | -0.078056 | H | -2.040974 | 1.682983 | 2.060176  |
| C  | -1.237506 | 3.803360  | -1.041378 | C | -5.079522 | 1.589063 | -0.455269 |
| C  | 0.097026  | 4.004105  | -1.214071 | H | -4.023766 | 3.470997 | -0.615751 |
| H  | -2.076907 | 4.405302  | -1.347647 | H | -3.607657 | 2.311965 | -1.891249 |
| H  | 0.624322  | 4.809734  | -1.698482 | C | -5.381909 | 1.665086 | 1.049899  |
| N  | 0.741745  | 2.935596  | -0.610542 | H | -4.375371 | 1.337699 | 2.955221  |
| N  | -1.378129 | 2.608134  | -0.354226 | H | -3.959758 | 0.169924 | 1.696341  |

|                    |           |           |           |    |           |           |           |
|--------------------|-----------|-----------|-----------|----|-----------|-----------|-----------|
| H                  | -5.938184 | 1.946258  | -1.037102 | H  | 1.512172  | -4.298489 | -0.939229 |
| H                  | -4.908497 | 0.543624  | -0.739192 | C  | 4.185669  | -1.818458 | -2.722011 |
| H                  | -6.249743 | 1.038013  | 1.290152  | H  | 4.578881  | -2.446696 | -3.531313 |
| H                  | -5.654782 | 2.697860  | 1.314773  | H  | 4.164377  | -0.783425 | -3.084946 |
|                    |           |           |           | H  | 4.889098  | -1.863012 | -1.884781 |
| <b>INT2B-NHC-2</b> |           |           |           | Ni | -0.382028 | 0.210907  | -0.124172 |
| C                  | -2.507734 | -3.205817 | -0.215006 | C  | 1.452935  | -1.795660 | 1.120286  |
| C                  | -1.235087 | -2.805041 | 0.181086  | H  | 0.672845  | -1.774715 | 1.895299  |
| C                  | -0.431891 | -1.959057 | -0.634804 | H  | 1.825283  | -2.835960 | 1.094456  |
| C                  | -1.020254 | -1.550134 | -1.872873 | Si | 2.813739  | -0.645712 | 1.777284  |
| C                  | -2.299308 | -1.959317 | -2.247360 | C  | 3.137562  | -1.115228 | 3.595733  |
| C                  | -3.075041 | -2.794908 | -1.432345 | H  | 3.888258  | -0.431133 | 4.016274  |
| H                  | -3.075027 | -3.871644 | 0.433942  | H  | 2.217995  | -0.940581 | 4.173832  |
| H                  | -0.837069 | -3.162552 | 1.125117  | C  | 4.433001  | -0.841432 | 0.800956  |
| H                  | -0.431836 | -0.946004 | -2.555752 | H  | 4.555713  | -1.911644 | 0.580113  |
| H                  | -2.697575 | -1.627447 | -3.205001 | H  | 4.281483  | -0.360267 | -0.172077 |
| C                  | -4.449519 | -3.248391 | -1.866252 | C  | 2.177629  | 1.148844  | 1.701078  |
| H                  | -5.120631 | -2.398408 | -2.049162 | H  | 2.088760  | 1.414315  | 0.637446  |
| H                  | -4.408450 | -3.827372 | -2.798473 | H  | 1.144663  | 1.143930  | 2.084342  |
| H                  | -4.921024 | -3.881811 | -1.106725 | C  | 3.602173  | -2.571061 | 3.786569  |
| C                  | 0.835673  | -1.342958 | -0.192402 | H  | 3.789135  | -2.809111 | 4.841698  |
| O                  | 1.833608  | -1.177513 | -1.235151 | H  | 2.852543  | -3.281702 | 3.417802  |
| Si                 | 2.453499  | -2.380850 | -2.225454 | H  | 4.531655  | -2.768568 | 3.237725  |
| C                  | 1.459295  | -2.587664 | -3.823381 | C  | 5.711935  | -0.310259 | 1.471762  |
| H                  | 1.306367  | -1.622385 | -4.322270 | H  | 5.900435  | -0.803301 | 2.433292  |
| H                  | 2.006859  | -3.236573 | -4.519933 | H  | 6.596144  | -0.475465 | 0.842348  |
| H                  | 0.474786  | -3.032510 | -3.647427 | H  | 5.652887  | 0.766475  | 1.668862  |
| C                  | 2.502814  | -4.047255 | -1.335997 | C  | 3.011118  | 2.202738  | 2.450486  |
| H                  | 2.801065  | -4.847183 | -2.025691 | H  | 2.553608  | 3.199255  | 2.406728  |
| H                  | 3.210442  | -4.042007 | -0.499287 | H  | 3.126275  | 1.944941  | 3.510025  |

|   |           |           |           |                   |           |           |           |
|---|-----------|-----------|-----------|-------------------|-----------|-----------|-----------|
| H | 4.017691  | 2.293855  | 2.026408  | H                 | -3.597857 | 1.026989  | 2.815690  |
| C | -1.620237 | 1.683230  | -0.121536 | H                 | -2.103858 | 0.202750  | 2.335551  |
| C | -3.505994 | 2.904064  | 0.209195  | C                 | -5.613074 | -1.001847 | 1.009182  |
| C | -2.539539 | 3.757579  | -0.223776 | H                 | -5.553338 | 1.155912  | 1.058981  |
| H | -4.536535 | 3.089969  | 0.464136  | H                 | -5.270785 | 0.484361  | -0.554525 |
| H | -2.573095 | 4.818830  | -0.411795 | C                 | -5.285454 | -1.229265 | 2.493264  |
| N | -1.399540 | 2.993424  | -0.427294 | H                 | -3.551760 | -1.256429 | 3.812721  |
| N | -2.931766 | 1.642732  | 0.254182  | H                 | -3.267877 | -1.964865 | 2.221853  |
| C | -0.081314 | 3.493742  | -0.834075 | H                 | -6.696633 | -1.037599 | 0.843498  |
| C | -0.146070 | 4.343252  | -2.109903 | H                 | -5.170043 | -1.810348 | 0.414826  |
| C | 0.602639  | 4.246861  | 0.315397  | H                 | -5.668960 | -2.204307 | 2.818659  |
| H | 0.499227  | 2.588393  | -1.049233 | H                 | -5.800394 | -0.468667 | 3.099216  |
| C | 1.267704  | 4.785948  | -2.522624 |                   |           |           |           |
| H | -0.766493 | 5.233237  | -1.930308 | <b>TS3B-NHC-2</b> |           |           |           |
| H | -0.627637 | 3.768847  | -2.910263 | C                 | -4.538842 | -2.357284 | -0.347022 |
| C | 2.012648  | 4.692496  | -0.098824 | C                 | -3.481843 | -1.879192 | 0.418439  |
| H | -0.004137 | 5.124345  | 0.582813  | C                 | -2.741585 | -0.745265 | 0.018917  |
| H | 0.639273  | 3.593986  | 1.193887  | C                 | -3.134512 | -0.114402 | -1.178384 |
| C | 1.976940  | 5.535191  | -1.383358 | C                 | -4.204279 | -0.583377 | -1.937226 |
| H | 1.213983  | 5.412849  | -3.420716 | C                 | -4.924003 | -1.716670 | -1.536725 |
| H | 1.855281  | 3.896655  | -2.793008 | H                 | -5.075747 | -3.247829 | -0.026030 |
| H | 2.483021  | 5.253003  | 0.717693  | H                 | -3.205749 | -2.406718 | 1.326154  |
| H | 2.633112  | 3.799885  | -0.262732 | H                 | -2.557136 | 0.745174  | -1.510095 |
| H | 2.994779  | 5.808469  | -1.687115 | H                 | -4.477229 | -0.075318 | -2.859774 |
| H | 1.443353  | 6.476292  | -1.183236 | C                 | -6.091093 | -2.231235 | -2.344316 |
| C | -3.543164 | 0.396999  | 0.749371  | H                 | -6.075490 | -1.842280 | -3.367774 |
| C | -3.195717 | 0.185559  | 2.232178  | H                 | -6.089020 | -3.326065 | -2.396601 |
| C | -5.055377 | 0.342277  | 0.511688  | H                 | -7.046547 | -1.932013 | -1.892421 |
| H | -3.071991 | -0.402180 | 0.167558  | C                 | -1.562980 | -0.223574 | 0.728199  |
| C | -3.772080 | -1.141647 | 2.744360  | O                 | 0.331997  | -1.557045 | -0.316772 |

|    |           |           |           |   |           |           |           |
|----|-----------|-----------|-----------|---|-----------|-----------|-----------|
| Si | 0.415696  | -2.180288 | -1.865242 | H | 0.644550  | -0.278438 | 4.168689  |
| C  | 0.504773  | -0.719276 | -3.067587 | C | -0.218963 | -5.051200 | 2.073337  |
| H  | 1.353283  | -0.063350 | -2.839725 | H | -0.817172 | -4.769942 | 2.946568  |
| H  | 0.614900  | -1.066554 | -4.103544 | H | -0.654446 | -5.970356 | 1.659159  |
| H  | -0.405652 | -0.111165 | -3.005866 | H | 0.784748  | -5.301530 | 2.436984  |
| C  | -1.109827 | -3.196078 | -2.315935 | C | 3.378253  | -2.899033 | 1.996239  |
| H  | -1.093664 | -3.449407 | -3.384274 | H | 4.427420  | -2.684998 | 1.748584  |
| H  | -1.175377 | -4.130343 | -1.749814 | H | 3.290521  | -2.858935 | 3.086298  |
| H  | -2.020919 | -2.620774 | -2.118527 | H | 3.180470  | -3.935079 | 1.692120  |
| C  | 1.985656  | -3.215008 | -2.107443 | C | 0.763703  | 2.224252  | -0.271714 |
| H  | 1.983958  | -3.690022 | -3.096946 | C | 1.094990  | 4.452175  | 0.020668  |
| H  | 2.883046  | -2.586260 | -2.044243 | C | 2.306810  | 3.892733  | -0.240014 |
| H  | 2.087795  | -4.006748 | -1.356873 | H | 0.825893  | 5.478333  | 0.212344  |
| Ni | -0.033193 | 0.457238  | -0.204292 | H | 3.284607  | 4.340388  | -0.321364 |
| C  | -1.168935 | -0.754371 | 1.963050  | N | 2.086174  | 2.533741  | -0.412581 |
| H  | -0.553024 | -0.102119 | 2.580151  | N | 0.165452  | 3.423480  | -0.016099 |
| H  | -1.832485 | -1.385700 | 2.565645  | C | 3.111749  | 1.525640  | -0.707924 |
| Si | 0.526091  | -2.215711 | 1.500851  | C | 3.707777  | 1.715759  | -2.109762 |
| C  | 0.569143  | -2.364535 | 3.475585  | C | 4.201783  | 1.482083  | 0.372153  |
| H  | -0.435561 | -2.572852 | 3.864641  | H | 2.576757  | 0.569414  | -0.683795 |
| H  | 1.150277  | -3.279069 | 3.662748  | C | 4.715977  | 0.596920  | -2.414949 |
| C  | -0.178703 | -3.931836 | 1.021855  | H | 4.210217  | 2.692686  | -2.161755 |
| H  | -1.193343 | -3.740995 | 0.645517  | H | 2.899136  | 1.730289  | -2.849960 |
| H  | 0.382386  | -4.284705 | 0.147403  | C | 5.216842  | 0.369968  | 0.062116  |
| C  | 2.427901  | -1.917010 | 1.288252  | H | 4.718691  | 2.451850  | 0.412851  |
| H  | 2.660409  | -1.906202 | 0.221347  | H | 3.733999  | 1.322143  | 1.350630  |
| H  | 2.631127  | -0.893234 | 1.639118  | C | 5.815612  | 0.530427  | -1.343886 |
| C  | 1.197806  | -1.219251 | 4.281455  | H | 5.153719  | 0.748612  | -3.408848 |
| H  | 1.219487  | -1.442865 | 5.357233  | H | 4.181924  | -0.364237 | -2.449628 |
| H  | 2.231469  | -1.021315 | 3.974214  | H | 6.009399  | 0.369536  | 0.819891  |

|    |           |           |           |   |           |           |           |
|----|-----------|-----------|-----------|---|-----------|-----------|-----------|
| H  | 4.709969  | -0.601369 | 0.135341  | H | 3.095394  | -0.033508 | 2.350968  |
| H  | 6.503531  | -0.296436 | -1.558453 | H | 4.264126  | 1.265842  | 2.084406  |
| H  | 6.411016  | 1.454973  | -1.382010 | C | 2.609195  | 3.388371  | 0.191327  |
| C  | -1.268220 | 3.510156  | 0.302405  | H | 3.341982  | 3.958900  | 0.779362  |
| C  | -1.516499 | 3.269924  | 1.798434  | H | 1.989855  | 4.125310  | -0.333628 |
| C  | -1.907090 | 4.816011  | -0.179395 | C | 3.330442  | 2.499811  | -0.838558 |
| H  | -1.717422 | 2.672044  | -0.239638 | H | 2.605614  | 1.910784  | -1.414660 |
| C  | -3.024540 | 3.252016  | 2.085910  | H | 3.923836  | 3.092741  | -1.545954 |
| H  | -1.023854 | 4.063389  | 2.379837  | H | 4.013870  | 1.794957  | -0.348903 |
| H  | -1.060455 | 2.312938  | 2.071078  | C | -0.159043 | 3.294908  | 1.719354  |
| C  | -3.418991 | 4.787553  | 0.102781  | H | 0.013277  | 4.105968  | 2.441740  |
| H  | -1.463302 | 5.670901  | 0.351341  | H | -0.481197 | 3.758496  | 0.779593  |
| H  | -1.710407 | 4.958992  | -1.249295 | C | -1.261439 | 2.346432  | 2.221375  |
| C  | -3.706233 | 4.538115  | 1.592428  | H | -0.963279 | 1.810914  | 3.132269  |
| H  | -3.199596 | 3.111349  | 3.159179  | H | -2.190242 | 2.885112  | 2.446025  |
| H  | -3.466225 | 2.382794  | 1.577718  | H | -1.492451 | 1.603670  | 1.450818  |
| H  | -3.876315 | 5.729007  | -0.224921 | C | 0.604670  | -1.402714 | -0.020176 |
| H  | -3.879378 | 3.987231  | -0.494423 | C | 0.311259  | -3.491704 | 0.822995  |
| H  | -4.788534 | 4.486921  | 1.763783  | C | 1.639414  | -3.336730 | 0.577122  |
| H  | -3.333454 | 5.392588  | 2.176995  | H | -0.230875 | -4.331759 | 1.225586  |
|    |           |           |           | H | 2.459722  | -4.020036 | 0.722613  |
|    |           |           |           | N | 1.800487  | -2.054759 | 0.070467  |
|    |           |           |           | N | -0.305203 | -2.309644 | 0.441051  |
| Ni | 0.215769  | 0.404620  | -0.656757 | C | 3.044396  | -1.440599 | -0.419934 |
| Si | 1.475659  | 2.417408  | 1.365295  | C | 4.292882  | -2.016606 | 0.255372  |
| H  | 1.201089  | 1.081119  | 0.708945  | C | 3.134629  | -1.538885 | -1.951614 |
| C  | 2.368644  | 1.930715  | 2.971999  | H | 2.959217  | -0.382616 | -0.152007 |
| H  | 1.622250  | 1.530722  | 3.672785  | C | 5.547754  | -1.286671 | -0.249828 |
| H  | 2.770689  | 2.838144  | 3.445832  | H | 4.387129  | -3.085021 | 0.013859  |
| C  | 3.492776  | 0.897652  | 2.772480  | H | 4.203833  | -1.934316 | 1.345206  |
| H  | 3.991815  | 0.646661  | 3.716929  |   |           |           |           |

|   |           |           |           |                   |           |           |           |
|---|-----------|-----------|-----------|-------------------|-----------|-----------|-----------|
| C | 4.403188  | -0.845676 | -2.471409 | H                 | -1.036878 | 3.763840  | -2.527838 |
| H | 3.137455  | -2.600878 | -2.237397 | C                 | -2.142405 | 1.516225  | -1.541747 |
| H | 2.235455  | -1.082402 | -2.382162 | C                 | -2.597044 | 0.364674  | -2.218388 |
| C | 5.666258  | -1.381373 | -1.779098 | C                 | -3.099946 | 2.237204  | -0.801764 |
| H | 6.439045  | -1.705868 | 0.232205  | C                 | -3.930076 | -0.038019 | -2.159109 |
| H | 5.495069  | -0.230110 | 0.049833  | H                 | -1.880027 | -0.210124 | -2.801901 |
| H | 4.477242  | -0.974674 | -3.557790 | C                 | -4.428294 | 1.816350  | -0.723801 |
| H | 4.319968  | 0.233931  | -2.288974 | H                 | -2.782615 | 3.132034  | -0.273478 |
| H | 6.550747  | -0.832488 | -2.124868 | C                 | -4.870708 | 0.668558  | -1.394520 |
| H | 5.817029  | -2.433944 | -2.061473 | H                 | -4.247730 | -0.921403 | -2.711126 |
| C | -1.728464 | -1.970726 | 0.607735  | H                 | -5.137655 | 2.393274  | -0.132379 |
| C | -2.658102 | -3.154043 | 0.314920  | C                 | -6.296572 | 0.184363  | -1.268089 |
| C | -1.998132 | -1.381691 | 1.999262  | H                 | -6.399723 | -0.555424 | -0.461011 |
| H | -1.923313 | -1.189991 | -0.135105 | H                 | -6.982741 | 1.007959  | -1.041074 |
| C | -4.125435 | -2.704114 | 0.423162  | H                 | -6.641833 | -0.297266 | -2.190364 |
| H | -2.476013 | -3.961883 | 1.038609  |                   |           |           |           |
| H | -2.447139 | -3.556262 | -0.683612 | <b>TS4B-NHC-2</b> |           |           |           |
| C | -3.457173 | -0.912265 | 2.095359  | Ni                | -0.542488 | -0.153286 | 0.773730  |
| H | -1.792788 | -2.147625 | 2.762059  | Si                | -2.080879 | -1.575309 | 1.846032  |
| H | -1.306471 | -0.551735 | 2.173360  | H                 | -0.072463 | -1.462150 | 1.337756  |
| C | -4.426720 | -2.065495 | 1.788567  | C                 | -2.943273 | -2.619906 | 0.480695  |
| H | -4.788292 | -3.559967 | 0.245961  | H                 | -3.637963 | -1.971950 | -0.073343 |
| H | -4.326450 | -1.971361 | -0.367042 | H                 | -3.569651 | -3.391032 | 0.953019  |
| H | -3.653273 | -0.500321 | 3.092758  | C                 | -1.954651 | -3.274307 | -0.498112 |
| H | -3.618313 | -0.097429 | 1.375975  | H                 | -2.458173 | -3.872595 | -1.269471 |
| H | -5.462933 | -1.705130 | 1.810871  | H                 | -1.348740 | -2.511615 | -1.004219 |
| H | -4.340846 | -2.830290 | 2.575247  | H                 | -1.254589 | -3.937441 | 0.025344  |
| C | -0.701935 | 1.882494  | -1.543820 | C                 | -1.470063 | -2.813208 | 3.180664  |
| C | -0.329423 | 3.065741  | -2.067467 | H                 | -0.866424 | -2.255277 | 3.911828  |
| H | 0.712032  | 3.384075  | -2.076884 | H                 | -0.767908 | -3.508030 | 2.696007  |

|   |           |           |           |   |           |           |           |
|---|-----------|-----------|-----------|---|-----------|-----------|-----------|
| C | -2.565325 | -3.607678 | 3.911774  | H | -5.264402 | -0.365233 | -1.418029 |
| H | -3.179091 | -4.185899 | 3.209667  | H | -2.898782 | -1.485657 | -4.187319 |
| H | -2.144210 | -4.318033 | 4.635866  | H | -3.317372 | -1.775690 | -2.502867 |
| H | -3.241822 | -2.943015 | 4.462569  | H | -5.365096 | -1.175317 | -3.770311 |
| C | -3.431096 | -0.507331 | 2.707742  | H | -4.612108 | 0.313889  | -4.338877 |
| H | -4.216406 | -1.180645 | 3.082965  | C | 1.146459  | 2.714181  | 0.731614  |
| H | -2.973448 | -0.051313 | 3.597363  | C | 2.389964  | 2.325493  | -0.083909 |
| C | -4.064921 | 0.588602  | 1.838057  | C | 1.312557  | 4.081314  | 1.406475  |
| H | -4.585222 | 0.159381  | 0.971681  | H | 0.994340  | 1.957218  | 1.508588  |
| H | -4.802531 | 1.183466  | 2.393345  | C | 3.638255  | 2.331325  | 0.809760  |
| H | -3.300069 | 1.274328  | 1.453523  | H | 2.515133  | 3.044064  | -0.907271 |
| C | -0.853249 | 1.526594  | -0.148258 | H | 2.231381  | 1.335848  | -0.523354 |
| C | -0.459870 | 3.573564  | -1.043432 | C | 2.564489  | 4.078794  | 2.300340  |
| C | -1.534254 | 3.046115  | -1.689364 | H | 1.423996  | 4.863563  | 0.642040  |
| H | 0.035592  | 4.522709  | -1.169241 | H | 0.414437  | 4.321724  | 1.988248  |
| H | -2.145102 | 3.453271  | -2.478863 | C | 3.822075  | 3.687650  | 1.506951  |
| N | -1.764278 | 1.801478  | -1.125127 | H | 4.521995  | 2.069262  | 0.217108  |
| N | -0.065087 | 2.639385  | -0.099830 | H | 3.531958  | 1.543913  | 1.569833  |
| C | -2.753601 | 0.815062  | -1.582010 | H | 2.691250  | 5.064967  | 2.762932  |
| C | -4.135496 | 1.437148  | -1.810949 | H | 2.416615  | 3.362380  | 3.121483  |
| C | -2.244115 | 0.069291  | -2.825227 | H | 4.693859  | 3.661413  | 2.172247  |
| H | -2.824747 | 0.099113  | -0.758208 | H | 4.025362  | 4.459882  | 0.750106  |
| C | -5.137016 | 0.353094  | -2.240689 | C | 5.602967  | -1.505927 | -0.091176 |
| H | -4.077453 | 2.199771  | -2.600747 | C | 4.265572  | -1.331140 | 0.244758  |
| H | -4.468471 | 1.938574  | -0.895264 | C | 3.232779  | -1.742977 | -0.622125 |
| C | -3.255827 | -0.996051 | -3.273368 | C | 3.619356  | -2.341308 | -1.835138 |
| H | -2.076149 | 0.794081  | -3.635321 | C | 4.961684  | -2.515168 | -2.168709 |
| H | -1.274693 | -0.385163 | -2.588082 | C | 5.981954  | -2.102455 | -1.304443 |
| C | -4.650317 | -0.390506 | -3.494403 | H | 6.373991  | -1.174550 | 0.602247  |
| H | -6.119905 | 0.805882  | -2.417666 | H | 4.015391  | -0.869821 | 1.195591  |

|                   |           |           |           |   |           |           |           |
|-------------------|-----------|-----------|-----------|---|-----------|-----------|-----------|
| H                 | 2.848768  | -2.670179 | -2.529650 | C | -5.687344 | -1.509534 | -1.249229 |
| H                 | 5.220886  | -2.979662 | -3.118188 | H | -5.518487 | 0.517944  | -0.529127 |
| C                 | 7.438471  | -2.314974 | -1.643668 | H | -4.749823 | 0.269996  | -2.103963 |
| H                 | 7.840591  | -3.204762 | -1.139851 | C | -5.893450 | -2.174806 | 0.121133  |
| H                 | 7.584237  | -2.456345 | -2.720161 | H | -4.717474 | -2.813840 | 1.839714  |
| H                 | 8.053186  | -1.463183 | -1.329142 | H | -3.947554 | -3.109957 | 0.283410  |
| C                 | 1.255759  | -0.870516 | 0.699218  | H | -6.652227 | -1.327298 | -1.737499 |
| H                 | 1.921100  | -0.496406 | 1.487814  | H | -5.125618 | -2.191094 | -1.903854 |
| C                 | 1.804904  | -1.547025 | -0.333461 | H | -6.417312 | -3.131068 | 0.001183  |
| H                 | 1.131408  | -1.963936 | -1.085539 | H | -6.541217 | -1.534351 | 0.738089  |
|                   |           |           |           | C | 0.403289  | 2.372301  | 0.236801  |
| <b>TS5A-NHC-1</b> |           |           |           | C | 1.131092  | 2.539425  | -1.106116 |
| C                 | 0.594820  | -1.199469 | 1.675329  | C | 0.571031  | 3.610022  | 1.125443  |
| Ni                | -0.304927 | -0.851127 | -0.078278 | H | 0.838016  | 1.510589  | 0.754123  |
| C                 | 1.060406  | -2.185439 | 0.729232  | C | 2.621939  | 2.831944  | -0.874045 |
| H                 | 0.708902  | -3.205441 | 0.886749  | H | 0.666113  | 3.363131  | -1.667139 |
| C                 | -1.397244 | 0.708982  | -0.131372 | H | 0.994371  | 1.624399  | -1.694334 |
| C                 | -2.090621 | 2.869210  | -0.038178 | C | 2.064705  | 3.885633  | 1.364514  |
| C                 | -3.190735 | 2.098021  | -0.248913 | H | 0.125925  | 4.487505  | 0.634526  |
| H                 | -1.998500 | 3.938342  | 0.061038  | H | 0.041511  | 3.462578  | 2.074427  |
| H                 | -4.224999 | 2.377243  | -0.364905 | C | 2.818880  | 4.054723  | 0.035941  |
| N                 | -2.749381 | 0.785118  | -0.313274 | H | 3.127173  | 2.982091  | -1.835811 |
| N                 | -1.007662 | 2.006888  | 0.040179  | H | 3.090362  | 1.955243  | -0.405115 |
| C                 | -3.572881 | -0.429854 | -0.420356 | H | 2.181815  | 4.778995  | 1.989671  |
| C                 | -3.770583 | -1.069562 | 0.963721  | H | 2.500255  | 3.046941  | 1.926173  |
| C                 | -4.914218 | -0.185696 | -1.119783 | H | 3.886634  | 4.219381  | 0.225594  |
| H                 | -2.976599 | -1.120192 | -1.030563 | H | 2.445962  | 4.953532  | -0.477343 |
| C                 | -4.554030 | -2.383897 | 0.844279  | H | -0.106219 | -1.514907 | 2.448034  |
| H                 | -4.312523 | -0.360712 | 1.606845  | C | 2.487115  | -2.118981 | 0.275360  |
| H                 | -2.784742 | -1.237532 | 1.412051  | C | 2.979050  | -1.016879 | -0.438136 |



|                    |           |           |           |    |           |           |           |
|--------------------|-----------|-----------|-----------|----|-----------|-----------|-----------|
| C                  | 3.385954  | -3.139391 | 0.606746  | C  | -2.194223 | 4.611453  | 1.341741  |
| C                  | 4.324231  | -0.928048 | -0.788002 | H  | -3.837642 | 3.197163  | 1.287949  |
| H                  | 2.282776  | -0.235392 | -0.730214 | H  | -2.407700 | 2.583992  | 2.126311  |
| C                  | 4.733174  | -3.051173 | 0.251967  | C  | -2.585994 | 5.425741  | 0.098962  |
| H                  | 3.031092  | -4.006976 | 1.159016  | H  | -2.442364 | 5.296393  | -2.071673 |
| C                  | 5.227946  | -1.945018 | -0.449563 | H  | -1.028402 | 4.692037  | -1.212682 |
| H                  | 4.677042  | -0.059841 | -1.341949 | H  | -2.559196 | 5.099458  | 2.253283  |
| H                  | 5.411751  | -3.856919 | 0.525114  | H  | -1.098244 | 4.574739  | 1.421248  |
| C                  | 6.679141  | -1.866127 | -0.864485 | H  | -2.158285 | 6.434053  | 0.155391  |
| H                  | 7.320290  | -2.455042 | -0.199215 | H  | -3.679335 | 5.547068  | 0.075215  |
| H                  | 6.825018  | -2.252038 | -1.882770 | C  | -2.349221 | -2.449992 | -0.022033 |
| H                  | 7.043686  | -0.832437 | -0.856087 | C  | -2.848131 | -3.126134 | 1.263759  |
| H                  | 1.293014  | -0.424512 | 1.989500  | C  | -2.764166 | -3.234114 | -1.275551 |
| H                  | 0.348840  | -2.129167 | -0.705643 | H  | -1.255019 | -2.400110 | 0.014140  |
|                    |           |           |           | C  | -2.351774 | -4.578354 | 1.338759  |
| <b>INT5A-NHC-1</b> |           |           |           | H  | -3.947722 | -3.111555 | 1.277500  |
| C                  | -1.929620 | 0.014264  | -0.013643 | H  | -2.506063 | -2.548086 | 2.130351  |
| C                  | -4.102295 | -0.631511 | -0.208068 | C  | -2.265229 | -4.685576 | -1.192424 |
| C                  | -4.081085 | 0.726538  | -0.211206 | H  | -3.860311 | -3.231336 | -1.363172 |
| H                  | -4.928246 | -1.321097 | -0.281044 | H  | -2.368368 | -2.731866 | -2.166178 |
| H                  | -4.885195 | 1.441237  | -0.286525 | C  | -2.758805 | -5.374675 | 0.089257  |
| N                  | -2.751382 | 1.102432  | -0.095911 | H  | -2.740610 | -5.057744 | 2.245012  |
| N                  | -2.784885 | -1.048097 | -0.090525 | H  | -1.255925 | -4.578127 | 1.428187  |
| C                  | -2.272536 | 2.490285  | -0.027739 | H  | -2.591286 | -5.241682 | -2.079428 |
| C                  | -2.674766 | 3.292096  | -1.274186 | H  | -1.165804 | -4.688358 | -1.205305 |
| C                  | -2.738304 | 3.176542  | 1.265097  | H  | -2.365177 | -6.396770 | 0.145715  |
| H                  | -1.180055 | 2.406911  | -0.003159 | H  | -3.855283 | -5.459681 | 0.055011  |
| C                  | -2.127119 | 4.725967  | -1.189855 | Ni | 0.008399  | -0.011821 | 0.229107  |
| H                  | -3.771195 | 3.326457  | -1.350483 | C  | 6.359087  | 1.150651  | -0.059537 |
| H                  | -2.304758 | 2.781129  | -2.170912 | C  | 4.998287  | 1.148153  | -0.365469 |

|                   |           |           |           |    |           |           |           |
|-------------------|-----------|-----------|-----------|----|-----------|-----------|-----------|
| C                 | 4.285247  | -0.050258 | -0.509413 | C  | -5.386063 | -1.275621 | -1.580208 |
| C                 | 4.994154  | -1.247211 | -0.338114 | H  | -5.380688 | -0.589151 | -2.435306 |
| C                 | 6.355204  | -1.247142 | -0.031935 | H  | -5.894560 | -2.193625 | -1.906520 |
| C                 | 7.063234  | -0.047680 | 0.116689  | H  | -6.003735 | -0.824696 | -0.795015 |
| H                 | 6.886155  | 2.098311  | 0.038983  | C  | 0.028319  | -2.457355 | 0.263400  |
| H                 | 4.476070  | 2.093924  | -0.499838 | Ni | 0.704156  | -0.832897 | 1.305404  |
| H                 | 4.469050  | -2.194189 | -0.450929 | C  | 0.385798  | -2.824275 | 1.601990  |
| H                 | 6.878988  | -2.194053 | 0.088519  | H  | -0.393991 | -3.138593 | 2.293220  |
| C                 | 8.530398  | -0.045052 | 0.481421  | H  | 1.301923  | -3.398336 | 1.730063  |
| H                 | 9.037040  | -0.946907 | 0.119042  | C  | 0.947065  | 0.756691  | 0.248255  |
| H                 | 9.048583  | 0.824058  | 0.059800  | C  | 0.626503  | 2.613159  | -1.013318 |
| H                 | 8.672688  | -0.009133 | 1.570519  | C  | 1.960154  | 2.346792  | -1.016665 |
| C                 | 2.795415  | -0.050060 | -0.780013 | H  | 0.076803  | 3.406005  | -1.491776 |
| H                 | 2.536137  | -0.937352 | -1.373727 | H  | 2.773071  | 2.866197  | -1.496557 |
| C                 | 1.941769  | -0.024414 | 0.515885  | N  | 2.139678  | 1.218657  | -0.233680 |
| H                 | 2.237524  | -0.889791 | 1.135030  | N  | 0.023209  | 1.632377  | -0.243334 |
| H                 | 2.249334  | 0.856221  | 1.107413  | C  | 3.395812  | 0.478349  | -0.033942 |
| H                 | 2.542154  | 0.818240  | -1.403818 | C  | 3.514629  | -0.664482 | -1.054692 |
|                   |           |           |           | C  | 4.631924  | 1.383567  | -0.057298 |
| <b>TS5A-NHC-2</b> |           |           |           | H  | 3.303264  | 0.033641  | 0.964264  |
| C                 | -3.713664 | -1.762294 | 0.271252  | C  | 4.784028  | -1.489393 | -0.798380 |
| C                 | -2.429265 | -2.055906 | 0.726218  | H  | 3.538312  | -0.235922 | -2.067300 |
| C                 | -1.339816 | -2.172762 | -0.166756 | H  | 2.616875  | -1.287776 | -0.980252 |
| C                 | -1.622490 | -1.956755 | -1.534573 | C  | 5.896968  | 0.551905  | 0.216376  |
| C                 | -2.905069 | -1.655505 | -1.979151 | H  | 4.730145  | 1.856216  | -1.045025 |
| C                 | -3.985853 | -1.559424 | -1.088113 | H  | 4.523228  | 2.187945  | 0.680324  |
| H                 | -4.525190 | -1.685159 | 0.992990  | C  | 6.037462  | -0.600892 | -0.790768 |
| H                 | -2.264731 | -2.181483 | 1.792237  | H  | 4.876606  | -2.278811 | -1.553900 |
| H                 | -0.807348 | -2.020259 | -2.252775 | H  | 4.690460  | -1.994213 | 0.174333  |
| H                 | -3.076283 | -1.494893 | -3.042387 | H  | 6.780287  | 1.200961  | 0.183580  |

|                    |           |           |           |   |           |           |           |
|--------------------|-----------|-----------|-----------|---|-----------|-----------|-----------|
| H                  | 5.844395  | 0.141722  | 1.235091  | N | 2.075055  | -1.238147 | 0.372909  |
| H                  | 6.927875  | -1.198258 | -0.559388 | C | -1.425838 | -1.599071 | -0.229102 |
| H                  | 6.190034  | -0.182700 | -1.796846 | C | -1.607496 | -1.606243 | -1.756087 |
| C                  | -1.417701 | 1.509884  | 0.063374  | C | -2.310768 | -2.648036 | 0.452068  |
| C                  | -1.698528 | 1.906414  | 1.521570  | H | -1.704465 | -0.609891 | 0.149364  |
| C                  | -2.287665 | 2.314191  | -0.908282 | C | -3.081149 | -1.410075 | -2.137810 |
| H                  | -1.651114 | 0.449251  | -0.059259 | H | -1.235261 | -2.562568 | -2.152637 |
| C                  | -3.185907 | 1.717859  | 1.853030  | H | -0.985393 | -0.808179 | -2.179044 |
| H                  | -1.403383 | 2.955919  | 1.668210  | C | -3.783657 | -2.414549 | 0.079227  |
| H                  | -1.072732 | 1.292536  | 2.179915  | H | -2.020217 | -3.656667 | 0.123711  |
| C                  | -3.775387 | 2.113283  | -0.578330 | H | -2.169675 | -2.604050 | 1.538945  |
| H                  | -2.049148 | 3.384696  | -0.824003 | C | -3.983926 | -2.441894 | -1.444195 |
| H                  | -2.077846 | 2.007376  | -1.940322 | H | -3.194098 | -1.470316 | -3.227228 |
| C                  | -4.083042 | 2.495233  | 0.877779  | H | -3.387267 | -0.399804 | -1.838738 |
| H                  | -3.378696 | 2.030550  | 2.886545  | H | -4.412745 | -3.170515 | 0.564786  |
| H                  | -3.426118 | 0.648231  | 1.790224  | H | -4.097051 | -1.437667 | 0.466847  |
| H                  | -4.388217 | 2.705130  | -1.269389 | H | -5.036145 | -2.251595 | -1.689859 |
| H                  | -4.031505 | 1.059919  | -0.739527 | H | -3.747722 | -3.447932 | -1.822861 |
| H                  | -5.140711 | 2.306363  | 1.100734  | C | 3.290859  | -0.411205 | 0.396604  |
| H                  | -3.918955 | 3.574883  | 1.013798  | C | 4.381956  | -0.985502 | 1.306303  |
| H                  | 0.731516  | -2.689084 | -0.535437 | C | 3.814156  | -0.167831 | -1.028361 |
| H                  | 0.854306  | -1.626659 | 2.636622  | H | 2.963101  | 0.552877  | 0.805687  |
|                    |           |           |           | C | 5.596713  | -0.042714 | 1.333873  |
| <b>INT5A-NHC-2</b> |           |           |           | H | 4.705135  | -1.964842 | 0.925441  |
| C                  | 0.851320  | -0.690141 | 0.117197  | H | 3.983617  | -1.143507 | 2.315907  |
| C                  | 1.992395  | -2.617813 | 0.492785  | C | 5.038484  | 0.758867  | -1.006749 |
| C                  | 0.682286  | -2.943223 | 0.326954  | H | 4.076744  | -1.135050 | -1.480947 |
| H                  | 2.844445  | -3.242773 | 0.704553  | H | 3.005193  | 0.266892  | -1.628597 |
| H                  | 0.193888  | -3.902972 | 0.367279  | C | 6.137722  | 0.214389  | -0.081622 |
| N                  | -0.000124 | -1.755506 | 0.111088  | H | 6.379733  | -0.467054 | 1.973620  |

|                   |           |           |           |   |           |           |           |
|-------------------|-----------|-----------|-----------|---|-----------|-----------|-----------|
| H                 | 5.300448  | 0.912986  | 1.789778  | H | -1.759202 | 0.647760  | -1.720505 |
| H                 | 5.423063  | 0.893375  | -2.024647 | C | -1.455888 | 3.757846  | -1.630730 |
| H                 | 4.726376  | 1.752806  | -0.654678 | H | -0.890818 | 3.534163  | -2.544474 |
| H                 | 6.982818  | 0.912430  | -0.041853 | H | -1.271502 | 4.821141  | -1.415693 |
| H                 | 6.525669  | -0.728412 | -0.495237 | C | -2.953665 | 3.536061  | -1.903222 |
| Ni                | 0.425906  | 1.145417  | -0.275051 | H | -3.298234 | 4.135479  | -2.755911 |
| C                 | -0.191350 | 3.009464  | -0.620896 | H | -3.145287 | 2.481082  | -2.124857 |
| H                 | 0.377501  | 3.718277  | -0.004829 | H | -3.567881 | 3.815264  | -1.038424 |
| C                 | -1.372564 | 2.497538  | 0.092417  | C | -2.161868 | 2.163607  | 0.944057  |
| C                 | -2.599839 | 2.145223  | -0.533409 | H | -2.877078 | 1.606917  | 0.333873  |
| C                 | -1.275866 | 2.175150  | 1.480118  | H | -2.655261 | 3.112776  | 1.212516  |
| C                 | -3.633328 | 1.534948  | 0.174077  | C | -1.831129 | 1.392389  | 2.229630  |
| H                 | -2.741612 | 2.374852  | -1.585102 | H | -1.108374 | 1.930953  | 2.854259  |
| C                 | -2.313935 | 1.552726  | 2.169873  | H | -2.728033 | 1.225560  | 2.841221  |
| H                 | -0.373883 | 2.461145  | 2.018929  | H | -1.403465 | 0.412041  | 1.993780  |
| C                 | -3.519542 | 1.218484  | 1.536614  | C | 0.156290  | 3.964498  | 1.009584  |
| H                 | -4.562690 | 1.303836  | -0.345015 | H | -0.661248 | 4.586204  | 1.405287  |
| H                 | -2.189496 | 1.336228  | 3.229926  | H | 0.543852  | 3.407788  | 1.873300  |
| C                 | -4.647974 | 0.569146  | 2.304000  | C | 1.263893  | 4.881072  | 0.465767  |
| H                 | -4.343759 | -0.389472 | 2.745857  | H | 0.950414  | 5.400989  | -0.449127 |
| H                 | -4.993410 | 1.204265  | 3.130657  | H | 1.544348  | 5.652466  | 1.194727  |
| H                 | -5.510997 | 0.373544  | 1.657897  | H | 2.174962  | 4.317407  | 0.234126  |
| C                 | -0.372367 | 3.515104  | -2.045509 | C | -0.681784 | -1.519775 | 0.025478  |
| H                 | -0.750191 | 2.729612  | -2.713572 | C | -0.252870 | -3.694436 | 0.545187  |
| H                 | 0.590666  | 3.840009  | -2.456309 | C | -1.580647 | -3.482310 | 0.740852  |
| H                 | -1.069953 | 4.367575  | -2.124807 | H | 0.342418  | -4.583075 | 0.680997  |
|                   |           |           |           | H | -2.356154 | -4.150256 | 1.080899  |
| <b>TS6A-NHC-2</b> |           |           |           | N | -1.821191 | -2.152550 | 0.430484  |
| Ni                | -0.547218 | 0.266704  | -0.768886 | N | 0.282976  | -2.485093 | 0.123070  |
| Si                | -0.717141 | 2.737700  | -0.194722 | C | -3.139273 | -1.507501 | 0.390339  |

|   |           |           |           |                   |           |           |           |
|---|-----------|-----------|-----------|-------------------|-----------|-----------|-----------|
| C | -3.963368 | -2.010373 | -0.801958 | H                 | 3.342687  | -1.371333 | -2.384451 |
| C | -3.899767 | -1.645350 | 1.714449  | H                 | 5.282570  | -2.819419 | -1.807174 |
| H | -2.916001 | -0.454284 | 0.211883  | H                 | 4.202600  | -4.171634 | -1.470844 |
| C | -5.298431 | -1.254496 | -0.876732 | H                 | 1.224800  | 3.005266  | -1.286120 |
| H | -4.146410 | -3.090015 | -0.694297 | C                 | 2.096761  | 1.517976  | -0.064132 |
| H | -3.378764 | -1.856527 | -1.715551 | C                 | 3.445990  | 1.717950  | -0.405209 |
| C | -5.228120 | -0.875987 | 1.632551  | C                 | 1.838357  | 0.913881  | 1.174848  |
| H | -4.106153 | -2.706195 | 1.919866  | C                 | 4.480218  | 1.312963  | 0.436694  |
| H | -3.280344 | -1.269308 | 2.536518  | H                 | 3.690142  | 2.207646  | -1.345106 |
| C | -6.078401 | -1.353341 | 0.444322  | C                 | 2.873145  | 0.505586  | 2.018969  |
| H | -5.901488 | -1.639126 | -1.708189 | H                 | 0.811600  | 0.747057  | 1.485980  |
| H | -5.090275 | -0.198371 | -1.099544 | C                 | 4.213470  | 0.689993  | 1.664497  |
| H | -5.783024 | -0.986231 | 2.572275  | H                 | 5.512304  | 1.485029  | 0.138101  |
| H | -5.009862 | 0.195607  | 1.517305  | H                 | 2.629151  | 0.037649  | 2.970414  |
| H | -7.005044 | -0.769079 | 0.383880  | C                 | 5.333812  | 0.199357  | 2.550413  |
| H | -6.375398 | -2.399549 | 0.612928  | H                 | 5.635773  | -0.819390 | 2.271088  |
| C | 1.652860  | -2.274946 | -0.362509 | H                 | 6.221803  | 0.835557  | 2.466942  |
| C | 2.711960  | -2.892349 | 0.557860  | H                 | 5.032441  | 0.173315  | 3.603123  |
| C | 1.796513  | -2.765275 | -1.810828 | C                 | 1.096613  | 1.253914  | -2.410528 |
| H | 1.791066  | -1.190775 | -0.351848 | H                 | 2.104544  | 1.391150  | -2.824585 |
| C | 4.120540  | -2.596807 | 0.015226  | H                 | 0.916339  | 0.168912  | -2.377111 |
| H | 2.569593  | -3.980800 | 0.617980  | H                 | 0.369561  | 1.674387  | -3.108543 |
| H | 2.594978  | -2.488679 | 1.570363  | C                 | 0.999841  | 1.960378  | -1.025970 |
| C | 3.204385  | -2.461622 | -2.343448 |                   |           |           |           |
| H | 1.606980  | -3.848054 | -1.845362 | <b>TS5B-NHC-1</b> |           |           |           |
| H | 1.026926  | -2.281977 | -2.424242 | C                 | -1.001332 | -0.218061 | -2.135419 |
| C | 4.282246  | -3.074747 | -1.436048 | Ni                | 0.201560  | -0.006577 | -0.661844 |
| H | 4.871595  | -3.068981 | 0.660947  | C                 | -1.232008 | -1.470077 | -1.285201 |
| H | 4.295276  | -1.514427 | 0.061278  | H                 | -1.135534 | -2.357979 | -1.919128 |
| H | 3.306061  | -2.833042 | -3.370297 | Si                | 0.140460  | -2.374189 | 0.060439  |

|   |           |           |           |   |           |           |           |
|---|-----------|-----------|-----------|---|-----------|-----------|-----------|
| C | -0.700658 | -4.103229 | 0.118476  | C | 4.351489  | 0.791703  | 1.412757  |
| H | -0.155040 | -4.666920 | 0.889165  | H | 2.851924  | -0.192194 | 0.239818  |
| H | -1.719167 | -3.980412 | 0.508239  | C | 5.242807  | -0.461428 | -1.129597 |
| C | 1.842658  | -2.703908 | -0.764018 | H | 4.780326  | 1.660133  | -1.232906 |
| H | 1.637094  | -3.165436 | -1.740476 | H | 3.544620  | 0.630071  | -1.968181 |
| H | 2.348646  | -1.761081 | -0.998612 | C | 5.330699  | -0.393322 | 1.404246  |
| C | 0.213971  | -1.979971 | 1.945329  | H | 4.925198  | 1.729431  | 1.405346  |
| H | -0.802128 | -1.662636 | 2.218677  | H | 3.740166  | 0.791326  | 2.322351  |
| H | 0.364032  | -2.948109 | 2.445885  | C | 6.153861  | -0.425670 | 0.107022  |
| C | -0.735361 | -4.942075 | -1.168235 | H | 5.840126  | -0.439034 | -2.049012 |
| H | -1.204114 | -5.919788 | -0.997245 | H | 4.686085  | -1.409027 | -1.139242 |
| H | -1.304893 | -4.452624 | -1.967344 | H | 5.990646  | -0.338416 | 2.278321  |
| H | 0.273361  | -5.128775 | -1.556076 | H | 4.761590  | -1.329863 | 1.496143  |
| C | 2.770829  | -3.614657 | 0.058676  | H | 6.826986  | -1.291807 | 0.107137  |
| H | 2.310507  | -4.591876 | 0.246512  | H | 6.791388  | 0.470006  | 0.062990  |
| H | 3.725245  | -3.794711 | -0.453967 | C | -0.890750 | 3.030203  | -0.250182 |
| H | 3.003132  | -3.173951 | 1.035950  | C | -1.623332 | 3.141761  | 1.095111  |
| C | 1.232801  | -0.969673 | 2.490753  | C | -1.186095 | 4.232193  | -1.155170 |
| H | 1.144956  | -0.861754 | 3.579879  | H | -1.233187 | 2.125009  | -0.761586 |
| H | 2.262782  | -1.282633 | 2.279263  | C | -3.137870 | 3.267634  | 0.868562  |
| H | 1.092733  | 0.018402  | 2.040581  | H | -1.248910 | 4.020206  | 1.641514  |
| C | 1.119033  | 1.568812  | -0.125967 | H | -1.389272 | 2.259839  | 1.703558  |
| C | 1.484668  | 3.779708  | 0.270272  | C | -2.701733 | 4.347605  | -1.386929 |
| C | 2.676262  | 3.141553  | 0.409223  | H | -0.823159 | 5.158625  | -0.686130 |
| H | 1.233252  | 4.822799  | 0.376854  | H | -0.651807 | 4.115643  | -2.105462 |
| H | 3.653862  | 3.527214  | 0.649972  | C | -3.466279 | 4.449698  | -0.057335 |
| N | 2.434829  | 1.795253  | 0.176970  | H | -3.652946 | 3.378934  | 1.830851  |
| N | 0.548711  | 2.812254  | -0.058659 | H | -3.507362 | 2.336027  | 0.417958  |
| C | 3.439117  | 0.727516  | 0.181743  | H | -2.917269 | 5.216346  | -2.020739 |
| C | 4.243061  | 0.706448  | -1.126484 | H | -3.046408 | 3.460554  | -1.937216 |

|                    |           |           |           |   |           |           |           |
|--------------------|-----------|-----------|-----------|---|-----------|-----------|-----------|
| H                  | -4.546102 | 4.495931  | -0.244809 | H | -1.775981 | -1.728561 | 0.483754  |
| H                  | -3.191893 | 5.389753  | 0.444750  | C | -4.022856 | -2.782187 | -0.677988 |
| H                  | -0.561152 | -0.431613 | -3.115155 | H | -2.424354 | -4.043642 | -1.407935 |
| C                  | -2.557351 | -1.480158 | -0.565735 | H | -2.238485 | -2.345231 | -1.860421 |
| C                  | -2.838113 | -0.554115 | 0.452649  | C | -3.533734 | -3.457735 | 1.716397  |
| C                  | -3.573208 | -2.380600 | -0.916893 | H | -1.884796 | -4.725312 | 1.080340  |
| C                  | -4.078544 | -0.528348 | 1.087884  | H | -1.406841 | -3.451126 | 2.210687  |
| H                  | -2.062161 | 0.151193  | 0.741779  | C | -4.447200 | -3.673281 | 0.499687  |
| C                  | -4.813366 | -2.356456 | -0.277155 | H | -4.657360 | -2.971477 | -1.552549 |
| H                  | -3.393188 | -3.105875 | -1.706925 | H | -4.158911 | -1.726276 | -0.408688 |
| C                  | -5.090373 | -1.432309 | 0.737971  | H | -3.819313 | -4.127621 | 2.536245  |
| H                  | -4.262244 | 0.204913  | 1.871017  | H | -3.661865 | -2.430832 | 2.087493  |
| H                  | -5.581003 | -3.068196 | -0.574776 | H | -5.490859 | -3.470839 | 0.769501  |
| C                  | -6.421759 | -1.429203 | 1.452964  | H | -4.398971 | -4.728836 | 0.192345  |
| H                  | -6.397760 | -2.068547 | 2.346186  | C | 3.166094  | -1.797535 | -0.112464 |
| H                  | -6.696961 | -0.421419 | 1.784413  | C | 4.282424  | -2.675741 | 0.467360  |
| H                  | -7.225054 | -1.803183 | 0.808373  | C | 3.568529  | -1.188457 | -1.464569 |
| H                  | -1.893583 | 0.406309  | -2.237076 | H | 2.965581  | -0.981017 | 0.590434  |
|                    |           |           |           | C | 5.576885  | -1.857807 | 0.609987  |
|                    |           |           |           | H | 4.464767  | -3.530376 | -0.200043 |
| <b>INT5B-NHC-1</b> |           |           |           | H | 3.965354  | -3.082182 | 1.435138  |
| C                  | 0.715493  | -2.011173 | 0.267291  | C | 4.862819  | -0.374287 | -1.321787 |
| C                  | 1.683172  | -3.699730 | -0.906403 | H | 3.715648  | -1.998304 | -2.193935 |
| C                  | 0.349202  | -3.954799 | -0.852065 | H | 2.750471  | -0.560805 | -1.834694 |
| H                  | 2.485023  | -4.251149 | -1.371086 | C | 5.995215  | -1.226292 | -0.727574 |
| H                  | -0.223316 | -4.776208 | -1.252025 | H | 6.378418  | -2.495320 | 1.001762  |
| N                  | -0.226329 | -2.911561 | -0.142982 | H | 5.415981  | -1.062207 | 1.351777  |
| N                  | 1.888182  | -2.514574 | -0.216050 | H | 5.156466  | 0.033615  | -2.296173 |
| C                  | -1.656803 | -2.773787 | 0.177643  | H | 4.669789  | 0.488604  | -0.668564 |
| C                  | -2.548445 | -3.012304 | -1.047602 | H | 6.897569  | -0.617878 | -0.591604 |
| C                  | -2.055615 | -3.674000 | 1.355330  |   |           |           |           |

|    |           |           |           |                   |           |          |           |
|----|-----------|-----------|-----------|-------------------|-----------|----------|-----------|
| H  | 6.257092  | -2.024891 | -1.437711 | H                 | -0.903212 | 1.075174 | 2.898399  |
| Ni | 0.382558  | -0.369609 | 1.258068  | C                 | -0.891410 | 4.311616 | -2.083393 |
| Si | 0.669509  | 3.232038  | 0.141566  | H                 | -1.750608 | 3.685775 | -1.821015 |
| C  | 1.505545  | 2.026681  | -1.076442 | H                 | -1.273154 | 5.200705 | -2.602315 |
| H  | 1.856647  | 1.161657  | -0.496382 | H                 | -0.286548 | 3.748325 | -2.805172 |
| H  | 0.753402  | 1.635330  | -1.773825 | C                 | 2.674618  | 2.636629 | -1.870142 |
| C  | 2.020552  | 3.896946  | 1.307690  | H                 | 3.472192  | 2.990955 | -1.206081 |
| H  | 2.562558  | 3.037449  | 1.726938  | H                 | 3.125388  | 1.909178 | -2.558505 |
| H  | 2.754277  | 4.454123  | 0.707365  | H                 | 2.346820  | 3.493846 | -2.471351 |
| C  | -0.067013 | 4.692566  | -0.838579 | C                 | 1.504924  | 4.787932 | 2.452436  |
| H  | -0.693281 | 5.279571  | -0.151135 | H                 | 2.324804  | 5.163451 | 3.078362  |
| H  | 0.755495  | 5.361390  | -1.132342 | H                 | 0.960784  | 5.661071 | 2.070491  |
| C  | -3.028393 | 0.682925  | -1.282955 | H                 | 0.821083  | 4.233659 | 3.105669  |
| C  | -1.884699 | 1.041297  | -0.574054 |                   |           |          |           |
| C  | -1.918206 | 2.014684  | 0.444089  | <b>TS5B-NHC-2</b> |           |          |           |
| C  | -3.164713 | 2.600326  | 0.707907  | C                 | 0.696365  | 1.329665 | -1.855629 |
| C  | -4.315713 | 2.236799  | 0.002323  | Ni                | -0.364619 | 0.422954 | -0.504560 |
| C  | -4.272635 | 1.269622  | -1.006077 | C                 | -0.096981 | 2.412071 | -1.155100 |
| H  | -2.953900 | -0.056906 | -2.078093 | H                 | -0.863791 | 2.827651 | -1.817131 |
| H  | -0.941638 | 0.564686  | -0.825624 | Si                | -1.166057 | 2.460480 | 0.624222  |
| H  | -3.235799 | 3.359025  | 1.484385  | C                 | -1.250062 | 4.369803 | 0.747264  |
| H  | -5.262831 | 2.716095  | 0.242647  | H                 | -1.794082 | 4.586345 | 1.678273  |
| C  | -5.509166 | 0.858361  | -1.771185 | H                 | -0.231429 | 4.752333 | 0.908818  |
| H  | -6.367446 | 1.489091  | -1.516665 | C                 | -2.985728 | 1.858500 | 0.573295  |
| H  | -5.352478 | 0.928277  | -2.855004 | H                 | -3.331360 | 1.877685 | -0.469670 |
| H  | -5.787479 | -0.182096 | -1.555363 | H                 | -2.982204 | 0.804330 | 0.867872  |
| C  | -0.686889 | 2.430447  | 1.223351  | C                 | -0.310512 | 1.930578 | 2.263377  |
| H  | -1.006066 | 3.282696  | 1.851527  | H                 | 0.733843  | 1.672876 | 2.044107  |
| C  | -0.124001 | 1.302110  | 2.147547  | H                 | -0.275447 | 2.808531 | 2.925204  |
| H  | 0.714257  | 1.719850  | 2.729895  | C                 | -1.908395 | 5.124322 | -0.419465 |



|   |           |           |           |   |           |           |           |
|---|-----------|-----------|-----------|---|-----------|-----------|-----------|
| H | -2.013485 | 6.195124  | -0.203286 | H | -4.637585 | -0.819683 | -2.562084 |
| H | -1.318392 | 5.036855  | -1.338497 | H | -6.101419 | -1.313400 | 0.928294  |
| H | -2.911221 | 4.735864  | -0.637865 | H | -5.222906 | -0.153570 | -0.065612 |
| C | -3.971496 | 2.631677  | 1.469742  | H | -6.784937 | -1.465436 | -1.492334 |
| H | -4.066945 | 3.678188  | 1.161083  | H | -6.077392 | -2.975266 | -0.921288 |
| H | -4.974470 | 2.185493  | 1.438300  | C | 1.830621  | -1.823799 | 0.638154  |
| H | -3.648047 | 2.630372  | 2.517970  | C | 2.069476  | -1.526423 | 2.125930  |
| C | -0.981255 | 0.757438  | 3.000287  | C | 2.841572  | -2.842722 | 0.095195  |
| H | -0.431551 | 0.483116  | 3.909789  | H | 1.938648  | -0.894047 | 0.072612  |
| H | -2.007158 | 1.003785  | 3.299482  | C | 3.506945  | -1.035228 | 2.353111  |
| H | -1.029449 | -0.129953 | 2.358980  | H | 1.886009  | -2.440955 | 2.709863  |
| C | -0.543191 | -1.411231 | -0.032312 | H | 1.344100  | -0.776949 | 2.460356  |
| C | -0.054593 | -3.527088 | 0.638268  | C | 4.277444  | -2.346724 | 0.325987  |
| C | -1.377516 | -3.497550 | 0.328446  | H | 2.711149  | -3.808279 | 0.605430  |
| H | 0.561224  | -4.337836 | 0.991965  | H | 2.654541  | -3.008658 | -0.972367 |
| H | -2.124194 | -4.275306 | 0.357085  | C | 4.535161  | -2.038886 | 1.809158  |
| N | -1.658831 | -2.204412 | -0.080778 | H | 3.673634  | -0.852946 | 3.422065  |
| N | 0.441360  | -2.254902 | 0.405041  | H | 3.635752  | -0.075333 | 1.836842  |
| C | -2.971192 | -1.726432 | -0.523746 | H | 4.988714  | -3.098232 | -0.038942 |
| C | -3.447964 | -2.449737 | -1.791619 | H | 4.435790  | -1.439257 | -0.267126 |
| C | -4.014949 | -1.813534 | 0.599626  | H | 5.551383  | -1.646174 | 1.939761  |
| H | -2.807424 | -0.673246 | -0.773282 | H | 4.478036  | -2.970961 | 2.392032  |
| C | -4.790267 | -1.866288 | -2.260893 | H | 0.392450  | 1.121371  | -2.882693 |
| H | -3.565329 | -3.522680 | -1.581123 | H | 0.556500  | 3.232115  | -0.830776 |
| H | -2.683358 | -2.354146 | -2.571485 | C | 2.129187  | 1.208526  | -1.619329 |
| C | -5.354909 | -1.227349 | 0.129662  | C | 2.781994  | 1.745743  | -0.481797 |
| H | -4.153625 | -2.865790 | 0.887152  | C | 2.955647  | 0.507950  | -2.533653 |
| H | -3.643213 | -1.286282 | 1.485988  | C | 4.156438  | 1.606968  | -0.290889 |
| C | -5.849323 | -1.923192 | -1.148572 | H | 2.203018  | 2.283630  | 0.263595  |
| H | -5.139367 | -2.401947 | -3.151741 | C | 4.322688  | 0.369269  | -2.331522 |

|                    |           |           |           |    |           |           |           |
|--------------------|-----------|-----------|-----------|----|-----------|-----------|-----------|
| H                  | 2.499854  | 0.081340  | -3.425286 | H  | -5.415624 | -1.852026 | -2.180704 |
| C                  | 4.961807  | 0.917198  | -1.204713 | H  | -3.987347 | -2.371430 | -1.285567 |
| H                  | 4.613783  | 2.046716  | 0.594456  | H  | -6.035013 | -3.089078 | -0.072001 |
| H                  | 4.916511  | -0.170498 | -3.067933 | H  | -6.645096 | -1.435141 | -0.066264 |
| C                  | 6.441472  | 0.724830  | -0.971890 | C  | -0.266567 | 3.579834  | -0.216123 |
| H                  | 6.658871  | -0.258269 | -0.528465 | C  | -0.380985 | 5.075835  | -0.523748 |
| H                  | 7.008975  | 0.784345  | -1.908560 | C  | 0.656172  | 3.325560  | 0.987883  |
| H                  | 6.842523  | 1.482671  | -0.289334 | H  | 0.173541  | 3.077056  | -1.087608 |
|                    |           |           |           | C  | 1.014876  | 5.665081  | -0.791515 |
|                    |           |           |           | H  | -0.825959 | 5.597359  | 0.335848  |
| <b>INT5B-NHC-2</b> |           |           |           | H  | -1.044550 | 5.235395  | -1.382472 |
| C                  | -1.721162 | 1.581343  | -0.179184 | C  | 2.048658  | 3.918888  | 0.732280  |
| C                  | -2.749732 | 3.512370  | 0.430165  | H  | 0.204977  | 3.777719  | 1.883038  |
| C                  | -3.658844 | 2.507755  | 0.549899  | H  | 0.722112  | 2.244942  | 1.159316  |
| H                  | -2.847939 | 4.568367  | 0.621287  | C  | 1.966884  | 5.414470  | 0.389260  |
| H                  | -4.691090 | 2.533690  | 0.859420  | H  | 0.929563  | 6.739206  | -0.994996 |
| N                  | -3.010439 | 1.337099  | 0.184804  | H  | 1.431055  | 5.204108  | -1.698804 |
| N                  | -1.575117 | 2.931394  | -0.024910 | H  | 2.689398  | 3.757851  | 1.607313  |
| C                  | -3.590514 | -0.013258 | 0.131674  | H  | 2.516415  | 3.375392  | -0.101592 |
| C                  | -4.479656 | -0.306126 | 1.345652  | H  | 2.964188  | 5.809084  | 0.159760  |
| C                  | -4.338000 | -0.250124 | -1.187820 | H  | 1.602744  | 5.967086  | 1.268083  |
| H                  | -2.726580 | -0.685549 | 0.163889  | Ni | -0.317099 | 0.377275  | -0.693254 |
| C                  | -4.985626 | -1.755620 | 1.284889  | Si | 3.944381  | -1.375969 | 0.121528  |
| H                  | -5.342600 | 0.375807  | 1.353966  | C  | 4.669238  | -1.632472 | -1.620729 |
| H                  | -3.914637 | -0.127958 | 2.268613  | H  | 3.907767  | -2.130742 | -2.236534 |
| C                  | -4.852654 | -1.696330 | -1.252346 | H  | 4.821087  | -0.644564 | -2.080140 |
| H                  | -5.178025 | 0.456728  | -1.261445 | C  | 3.396220  | -3.058575 | 0.816295  |
| H                  | -3.657495 | -0.041104 | -2.021451 | H  | 2.529838  | -3.395972 | 0.232100  |
| C                  | -5.724624 | -2.037400 | -0.033188 | H  | 4.196885  | -3.787708 | 0.623752  |
| H                  | -5.640140 | -1.957947 | 2.141522  | C  | 5.294425  | -0.632126 | 1.245620  |
| H                  | -4.125730 | -2.430015 | 1.371864  |    |           |           |           |

|   |           |           |           |                   |           |           |           |
|---|-----------|-----------|-----------|-------------------|-----------|-----------|-----------|
| H | 4.878600  | -0.496602 | 2.254310  | C                 | 2.479091  | -0.167720 | -0.022054 |
| H | 6.105793  | -1.366408 | 1.356066  | H                 | 2.075721  | 0.039616  | 0.979465  |
| C | 1.376008  | -0.629846 | -0.982062 | H                 | 2.872773  | 0.798490  | -0.370057 |
| H | 1.730649  | -0.743554 | -2.010576 |                   |           |           |           |
| C | 5.869251  | 0.703104  | 0.738598  | <b>TS6B-NHC-1</b> |           |           |           |
| H | 5.090116  | 1.472297  | 0.665322  | Ni                | -0.439570 | 0.651085  | 0.645097  |
| H | 6.652028  | 1.093458  | 1.401958  | Si                | -1.854960 | 0.454764  | 2.482740  |
| H | 6.311541  | 0.594517  | -0.259625 | H                 | 0.125400  | 0.115220  | 1.902984  |
| C | 5.983302  | -2.432243 | -1.665756 | C                 | -3.196206 | -0.871921 | 2.096814  |
| H | 5.858625  | -3.436341 | -1.241327 | H                 | -3.792782 | -0.515975 | 1.247253  |
| H | 6.351931  | -2.557351 | -2.692153 | H                 | -3.895006 | -0.936311 | 2.944308  |
| H | 6.775902  | -1.934541 | -1.093012 | C                 | -2.621372 | -2.263908 | 1.789876  |
| C | 3.042395  | -3.069268 | 2.313767  | H                 | -3.400510 | -2.998849 | 1.540936  |
| H | 2.727827  | -4.065874 | 2.648924  | H                 | -1.911168 | -2.232233 | 0.955252  |
| H | 3.896273  | -2.767958 | 2.933000  | H                 | -2.066052 | -2.660032 | 2.649194  |
| H | 2.216711  | -2.382326 | 2.531689  | C                 | -1.124656 | -0.045032 | 4.194785  |
| C | 0.419797  | -1.657185 | -0.590736 | H                 | -0.351266 | 0.693197  | 4.457729  |
| C | -0.060668 | -1.797077 | 0.748093  | H                 | -0.584110 | -0.994733 | 4.060751  |
| C | -0.244797 | -2.470124 | -1.566741 | C                 | -2.122146 | -0.183894 | 5.356526  |
| C | -1.062396 | -2.721971 | 1.077234  | H                 | -2.882081 | -0.945476 | 5.141845  |
| H | 0.413532  | -1.236025 | 1.546666  | H                 | -1.628724 | -0.473642 | 6.294644  |
| C | -1.237270 | -3.367938 | -1.221762 | H                 | -2.651575 | 0.757856  | 5.545532  |
| H | 0.070081  | -2.382785 | -2.604325 | C                 | -2.797952 | 2.103239  | 2.806234  |
| C | -1.662568 | -3.534929 | 0.116149  | H                 | -3.562488 | 1.919012  | 3.576134  |
| H | -1.362269 | -2.817808 | 2.119757  | H                 | -2.089626 | 2.817598  | 3.252111  |
| H | -1.689516 | -3.982020 | -1.999563 | C                 | -3.455137 | 2.736851  | 1.570771  |
| C | -2.690305 | -4.583271 | 0.471211  | H                 | -4.166347 | 2.046554  | 1.098013  |
| H | -3.636824 | -4.434322 | -0.066372 | H                 | -4.007329 | 3.654483  | 1.816614  |
| H | -2.338551 | -5.592462 | 0.217354  | H                 | -2.704807 | 2.985606  | 0.811970  |
| H | -2.916044 | -4.575972 | 1.543337  | C                 | -1.257152 | 1.432521  | -0.919055 |

|   |           |           |           |    |           |           |           |
|---|-----------|-----------|-----------|----|-----------|-----------|-----------|
| C | -1.720631 | 2.962361  | -2.538710 | C  | 0.682913  | 5.879091  | -0.067433 |
| C | -2.475099 | 1.859343  | -2.789278 | H  | -0.376128 | 5.368000  | -1.878903 |
| H | -1.654721 | 3.898608  | -3.068749 | H  | -1.365626 | 5.203778  | -0.421078 |
| H | -3.186092 | 1.659802  | -3.574979 | C  | 2.103623  | 5.620812  | -0.595010 |
| N | -2.181661 | 0.939905  | -1.793818 | H  | 3.450085  | 3.945953  | -0.968961 |
| N | -0.993043 | 2.690060  | -1.391008 | H  | 2.491924  | 3.789862  | 0.497265  |
| C | -2.806670 | -0.380552 | -1.645841 | H  | 0.432300  | 6.943810  | -0.144312 |
| C | -4.335652 | -0.271241 | -1.541748 | H  | 0.638762  | 5.621004  | 1.000479  |
| C | -2.391495 | -1.335255 | -2.772884 | H  | 2.832831  | 6.200649  | -0.016215 |
| H | -2.412747 | -0.762515 | -0.699822 | H  | 2.171653  | 5.974856  | -1.634473 |
| C | -4.961714 | -1.658200 | -1.326415 | Si | 3.878980  | -0.790716 | -0.129128 |
| H | -4.734880 | 0.166653  | -2.468167 | C  | 4.459694  | -1.569180 | 1.505084  |
| H | -4.597833 | 0.410873  | -0.725116 | H  | 4.114631  | -0.946217 | 2.341273  |
| C | -3.012385 | -2.722126 | -2.548337 | H  | 3.925634  | -2.524437 | 1.605308  |
| H | -2.726315 | -0.927966 | -3.738506 | C  | 4.563041  | 0.969611  | -0.397189 |
| H | -1.299636 | -1.400016 | -2.803407 | H  | 3.960857  | 1.423056  | -1.198906 |
| C | -4.542027 | -2.639973 | -2.431551 | H  | 4.336827  | 1.558659  | 0.502323  |
| H | -6.054040 | -1.568795 | -1.285405 | C  | 4.415644  | -1.906086 | -1.578909 |
| H | -4.639823 | -2.048579 | -0.352264 | H  | 3.845261  | -1.610094 | -2.471884 |
| H | -2.723785 | -3.396561 | -3.364152 | H  | 5.465258  | -1.676457 | -1.812981 |
| H | -2.595004 | -3.148650 | -1.626233 | C  | 0.405237  | -3.945655 | 0.939084  |
| H | -4.961099 | -3.634110 | -2.232684 | C  | 1.041846  | -2.708156 | 1.017772  |
| H | -4.962002 | -2.306158 | -3.392329 | C  | 1.257453  | -1.927485 | -0.129026 |
| C | 0.002434  | 3.557035  | -0.746372 | C  | 0.815650  | -2.448586 | -1.354596 |
| C | 1.409163  | 3.286478  | -1.299804 | C  | 0.178194  | -3.686470 | -1.431900 |
| C | -0.360252 | 5.043416  | -0.828583 | C  | -0.049922 | -4.455411 | -0.283647 |
| H | -0.013905 | 3.255670  | 0.308525  | H  | 0.242058  | -4.518893 | 1.849187  |
| C | 2.453315  | 4.125200  | -0.549553 | H  | 1.361605  | -2.337130 | 1.986729  |
| H | 1.425451  | 3.531408  | -2.371968 | H  | 0.983801  | -1.874406 | -2.263369 |
| H | 1.622006  | 2.216932  | -1.203818 | H  | -0.156749 | -4.056109 | -2.398733 |

|           |           |           |           |    |           |           |           |
|-----------|-----------|-----------|-----------|----|-----------|-----------|-----------|
| C         | -0.806709 | -5.760638 | -0.353307 | H  | 0.939646  | 2.093446  | -0.056157 |
| H         | -1.882043 | -5.600327 | -0.193991 | H  | 1.252605  | -1.921384 | -1.548685 |
| H         | -0.690819 | -6.243144 | -1.330212 | H  | 3.617341  | -1.988581 | -0.864902 |
| H         | -0.467769 | -6.464652 | 0.414830  | C  | 5.101634  | -0.014437 | 0.319657  |
| C         | 1.531651  | 0.284984  | 1.121843  | H  | 5.430066  | -1.029284 | 0.569696  |
| H         | 1.935662  | -0.107564 | 2.060879  | H  | 5.741354  | 0.341631  | -0.499287 |
| H         | 1.908698  | 1.313949  | 1.038175  | H  | 5.297754  | 0.626970  | 1.185994  |
| C         | 4.267343  | -3.422813 | -1.347965 | C  | -0.971923 | 1.308959  | -2.094123 |
| H         | 3.228634  | -3.701210 | -1.147323 | H  | -2.024514 | 1.244303  | -2.392777 |
| H         | 4.601210  | -3.994159 | -2.223628 | H  | -0.842603 | 2.258153  | -1.565016 |
| H         | 4.867157  | -3.756334 | -0.493156 | H  | -0.364665 | 1.359502  | -3.006504 |
| C         | 5.975527  | -1.809500 | 1.632591  | C  | -0.563538 | 0.096520  | -1.230538 |
| H         | 6.530887  | -0.865278 | 1.654520  | H  | -0.752135 | -0.805959 | -1.831559 |
| H         | 6.221484  | -2.352260 | 2.554082  | Si | -1.664309 | -0.168645 | 0.325515  |
| H         | 6.366954  | -2.397274 | 0.793451  | C  | -1.203505 | -1.841565 | 1.109921  |
| C         | 6.055148  | 1.106505  | -0.748271 | H  | -2.091672 | -2.216035 | 1.640147  |
| H         | 6.334629  | 2.155343  | -0.912318 | H  | -1.017071 | -2.564271 | 0.302645  |
| H         | 6.698978  | 0.720639  | 0.049850  | C  | -3.480114 | -0.223971 | -0.238862 |
| H         | 6.306539  | 0.556465  | -1.662731 | H  | -4.106484 | -0.381919 | 0.651270  |
| C         | 1.961127  | -0.590813 | -0.071419 | H  | -3.765363 | 0.762477  | -0.630264 |
| H         | 1.711363  | -0.053071 | -0.998321 | C  | -1.454985 | 1.188984  | 1.639824  |
|           |           |           |           | H  | -0.396518 | 1.232587  | 1.927007  |
| <b>4a</b> |           |           |           | H  | -1.986378 | 0.832592  | 2.535209  |
| C         | 2.857434  | 1.154776  | 0.139180  | C  | -0.001419 | -1.820704 | 2.074001  |
| C         | 1.518431  | 1.193407  | -0.245924 | H  | 0.911596  | -1.484858 | 1.572297  |
| C         | 0.904472  | 0.089785  | -0.860186 | H  | -0.180587 | -1.145369 | 2.918929  |
| C         | 1.696786  | -1.047257 | -1.076870 | H  | 0.195444  | -2.817484 | 2.488709  |
| C         | 3.034959  | -1.086743 | -0.686640 | C  | -1.958236 | 2.596604  | 1.275233  |
| C         | 3.642811  | 0.014461  | -0.072050 | H  | -1.377283 | 3.034468  | 0.455534  |
| H         | 3.300108  | 2.026100  | 0.617789  | H  | -3.007226 | 2.582356  | 0.956224  |

|                   |           |           |           |    |           |           |           |
|-------------------|-----------|-----------|-----------|----|-----------|-----------|-----------|
| H                 | -1.884439 | 3.284493  | 2.126827  | H  | -5.627136 | -3.103152 | 0.441793  |
| C                 | -3.787672 | -1.307067 | -1.288783 | C  | 2.411722  | -2.337354 | -0.170628 |
| H                 | -4.850645 | -1.322610 | -1.559875 | C  | 3.017974  | -2.432945 | 1.237927  |
| H                 | -3.219157 | -1.143037 | -2.212467 | C  | 3.202689  | -3.169880 | -1.188758 |
| H                 | -3.529665 | -2.307771 | -0.921042 | H  | 2.425034  | -1.289793 | -0.489883 |
|                   |           |           |           | C  | 4.497535  | -2.019899 | 1.226011  |
| <b>TS6B-NHC-2</b> |           |           |           | H  | 2.922757  | -3.467472 | 1.599221  |
| C                 | -0.009985 | -1.760068 | -0.120604 | H  | 2.438332  | -1.796974 | 1.917418  |
| C                 | 0.471330  | -3.979545 | -0.083529 | C  | 4.679495  | -2.741708 | -1.198164 |
| C                 | -0.880485 | -3.854728 | -0.021465 | H  | 3.143758  | -4.236217 | -0.926891 |
| H                 | 1.092975  | -4.860286 | -0.090363 | H  | 2.753504  | -3.055197 | -2.182462 |
| H                 | -1.652669 | -4.605420 | 0.032753  | C  | 5.299431  | -2.840684 | 0.204442  |
| N                 | -1.157765 | -2.497011 | -0.048963 | H  | 4.923779  | -2.130994 | 2.230398  |
| N                 | 0.986654  | -2.694173 | -0.152046 | H  | 4.570803  | -0.953473 | 0.972443  |
| C                 | -2.503879 | -1.907569 | 0.031164  | H  | 5.239549  | -3.360238 | -1.909857 |
| C                 | -3.396953 | -2.387330 | -1.122339 | H  | 4.750760  | -1.705569 | -1.555213 |
| C                 | -3.142284 | -2.182719 | 1.400908  | H  | 6.342854  | -2.503056 | 0.181401  |
| H                 | -2.352263 | -0.828107 | -0.073356 | H  | 5.315175  | -3.894966 | 0.519195  |
| C                 | -4.790871 | -1.746946 | -1.026003 | Ni | 0.133470  | 0.146664  | -0.117385 |
| H                 | -3.494195 | -3.482232 | -1.081694 | Si | 2.310802  | 2.701207  | 0.024821  |
| H                 | -2.916945 | -2.140258 | -2.076837 | C  | 2.890475  | 1.627253  | 1.481292  |
| C                 | -4.538438 | -1.547897 | 1.487645  | H  | 2.197032  | 1.776176  | 2.320444  |
| H                 | -3.218989 | -3.269572 | 1.553403  | H  | 2.756740  | 0.579529  | 1.178467  |
| H                 | -2.484574 | -1.790666 | 2.186077  | C  | 2.204127  | 4.523870  | 0.552753  |
| C                 | -5.440680 | -2.023235 | 0.338474  | H  | 1.558720  | 4.584290  | 1.440270  |
| H                 | -5.426783 | -2.120356 | -1.838158 | H  | 3.199403  | 4.861730  | 0.876832  |
| H                 | -4.692715 | -0.663187 | -1.165622 | C  | 3.537570  | 2.553543  | -1.423543 |
| H                 | -4.993491 | -1.784990 | 2.457291  | H  | 3.089537  | 3.032396  | -2.305968 |
| H                 | -4.435129 | -0.456745 | 1.439224  | H  | 4.421119  | 3.160495  | -1.176728 |
| H                 | -6.418074 | -1.527824 | 0.397004  | C  | -0.433404 | 1.985121  | 0.508141  |

|   |           |          |           |           |           |                     |
|---|-----------|----------|-----------|-----------|-----------|---------------------|
| H | -0.159584 | 2.134720 | 1.553516  |           |           |                     |
| C | 3.979726  | 1.122503 | -1.781026 | <b>5a</b> |           |                     |
| H | 3.122874  | 0.504152 | -2.069845 | C         | 3.749574  | -1.281668 -0.028964 |
| H | 4.699482  | 1.112278 | -2.609966 | C         | 2.372788  | -1.097980 -0.025696 |
| H | 4.460065  | 0.632054 | -0.925719 | C         | 1.812977  | 0.193574 -0.016196  |
| C | 4.335786  | 1.876562 | 1.944485  | C         | 2.699104  | 1.283035 -0.010930  |
| H | 4.474444  | 2.910396 | 2.284101  | C         | 4.080224  | 1.095355 -0.013715  |
| H | 4.618375  | 1.218687 | 2.776260  | C         | 4.632620  | -0.189569 -0.020463 |
| H | 5.054704  | 1.703683 | 1.133882  | H         | 4.153415  | -2.292043 -0.039237 |
| C | 1.663086  | 5.458673 | -0.544640 | H         | 1.722258  | -1.967848 -0.033463 |
| H | 1.614504  | 6.501416 | -0.206477 | H         | 2.296739  | 2.293913 -0.007352  |
| H | 2.295966  | 5.434738 | -1.440611 | H         | 4.738669  | 1.961188 -0.011207  |
| H | 0.651178  | 5.164762 | -0.848373 | C         | 6.126637  | -0.406336 0.002038  |
| C | -1.867483 | 2.025993 | 0.230128  | H         | 6.670236  | 0.510425 -0.248417  |
| C | -2.404282 | 1.896909 | -1.073439 | H         | 6.465074  | -0.729750 0.995453  |
| C | -2.801017 | 2.163396 | 1.284442  | H         | 6.429136  | -1.184075 -0.708997 |
| C | -3.779910 | 1.899311 | -1.296267 | C         | 0.363771  | 0.448544 -0.013862  |
| H | -1.729235 | 1.778156 | -1.915932 | C         | -0.640983 | -0.450402 -0.023032 |
| C | -4.171356 | 2.167722 | 1.050993  | H         | -0.376647 | -1.511140 -0.033204 |
| H | -2.429392 | 2.272246 | 2.301536  | H         | 0.109079  | 1.510046 -0.002879  |
| C | -4.696552 | 2.027567 | -0.244299 | Si        | -2.466266 | -0.017091 0.011760  |
| H | -4.150988 | 1.795417 | -2.314706 | C         | -3.165628 | -0.434316 1.731109  |
| H | -4.854267 | 2.280791 | 1.891644  | C         | -2.554533 | 0.394044 2.875297   |
| C | -6.186628 | 1.968862 | -0.483071 | H         | -3.003447 | -1.504646 1.921588  |
| H | -6.575146 | 0.948616 | -0.349282 | H         | -4.256767 | -0.297326 1.707400  |
| H | -6.733273 | 2.614430 | 0.214325  | H         | -2.953437 | 0.095707 3.852819   |
| H | -6.443936 | 2.280562 | -1.501695 | H         | -1.464943 | 0.276307 2.910884   |
| C | 0.594548  | 2.115499 | -0.501581 | H         | -2.763019 | 1.463639 2.750276   |
| H | 0.272751  | 2.522022 | -1.464096 | C         | -2.707095 | 1.834965 -0.334281  |
| H | 1.044273  | 0.756135 | -1.229509 | C         | -2.352448 | 2.283799 -1.763629  |

|   |           |           |           |
|---|-----------|-----------|-----------|
| H | -2.117374 | 2.409465  | 0.393699  |
| H | -3.756713 | 2.080273  | -0.116523 |
| H | -2.495483 | 3.363378  | -1.897181 |
| H | -1.308526 | 2.055396  | -2.007759 |
| H | -2.977543 | 1.776799  | -2.508138 |
| C | -3.380130 | -1.045416 | -1.300071 |
| C | -3.273337 | -2.569552 | -1.110104 |
| H | -2.993454 | -0.767955 | -2.290273 |
| H | -4.438157 | -0.744581 | -1.296234 |
| H | -3.816443 | -3.115601 | -1.891473 |
| H | -2.229752 | -2.905576 | -1.145017 |
| H | -3.686421 | -2.885184 | -0.144421 |

**g) Proposed mechanism for 5a-5c**

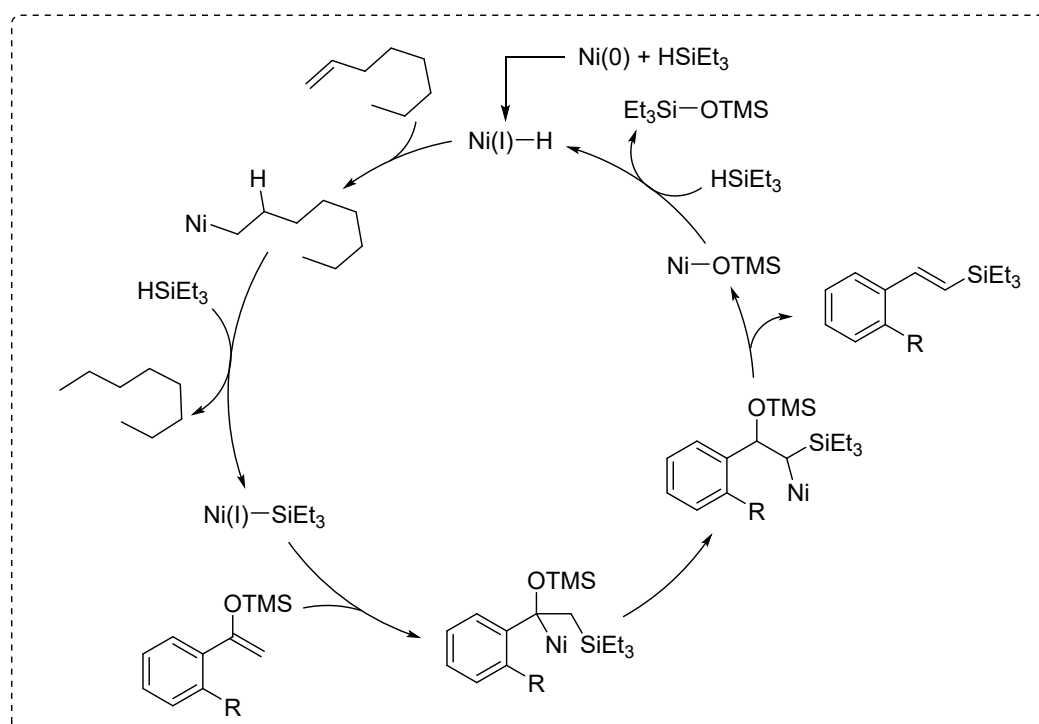



## VI. Analysis Data for the Products

### 1-methoxy-4-vinylbenzene (**3c**)<sup>11</sup>

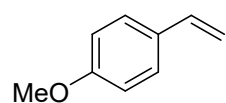

According to the general procedure B, the reaction gave **3c** in 75% yield (50 mg) as colorless liquid. <sup>1</sup>H NMR (400 MHz, CDCl<sub>3</sub>) δ 7.41 (d, *J* = 7.3 Hz, 2H), 6.92 (d, *J* = 7.3 Hz, 2H), 6.73 (dd, *J* = 17.6, 10.9 Hz, 1H), 5.68 (d, *J* = 17.6 Hz, 1H), 5.19 (d, *J* = 10.9 Hz, 1H), 3.86 (s, 3H). <sup>13</sup>C NMR (126 MHz, CDCl<sub>3</sub>) δ 159.4, 136.2, 130.5, 127.4, 113.9, 111.6, 55.3.

### 1-(benzyloxy)-4-vinylbenzene (**3d**)<sup>11</sup>

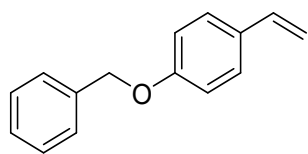

According to the general procedure B, the reaction gave **3d** in 91% yield (96 mg) as white solid. m.p. 62.2 – 62.8 °C. <sup>1</sup>H NMR (500 MHz, CDCl<sub>3</sub>) δ 7.50 – 7.28 (m, 7H), 6.92 (dd, *J* = 8.7, 2.0 Hz, 2H), 6.65 (dd, *J* = 17.6, 10.9 Hz, 1H), 5.60 (d, *J* = 17.5 Hz, 1H), 5.12 (d, *J* = 10.9 Hz, 1H), 5.06 (s, 2H). <sup>13</sup>C NMR (126 MHz, CDCl<sub>3</sub>) δ 158.6, 137.0, 136.2, 130.7, 128.6, 128.0, 127.5, 127.4, 114.9, 111.7, 70.0.

### 4-vinyl-1,1'-biphenyl (**3e**)<sup>12</sup>

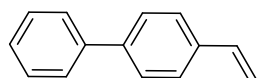

According to the general procedure B, the reaction gave **3e** in 73% yield (66 mg) as white solid. m.p. 118.8 – 119.4 °C. <sup>1</sup>H NMR (400 MHz, CDCl<sub>3</sub>) δ 7.62 (dd, *J* = 12.6, 8.0 Hz, 4H), 7.56 – 7.43 (m, 4H), 7.38 (t, *J* = 7.3 Hz, 1H), 6.80 (dd, *J* = 17.6, 10.9 Hz, 1H), 5.83 (d, *J* = 17.6 Hz, 1H), 5.31 (d, *J* = 10.9 Hz, 1H). <sup>13</sup>C NMR (126 MHz, CDCl<sub>3</sub>) δ 140.8, 140.6, 136.7, 136.5, 128.8, 127.4, 127.3, 127.0, 126.7, 113.9.

### Methyl 4-vinylbenzoate (**3f**)<sup>13</sup>

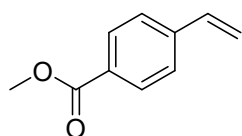

According to the general procedure B, the reaction gave **3f** in 62% yield (50 mg) as white solid. m.p. 32.1 – 32.7 °C. <sup>1</sup>H NMR (500 MHz, CDCl<sub>3</sub>) δ 7.99 (d, *J* = 8.1 Hz, 2H), 7.46 (d, *J* = 8.0 Hz, 2H), 6.75 (dd, *J* = 17.6, 10.8 Hz, 1H), 5.86 (d, *J* = 17.6 Hz, 1H), 5.38 (d, *J* = 10.8 Hz, 1H), 3.91 (s, 3H). <sup>13</sup>C NMR (126 MHz, CDCl<sub>3</sub>) δ 166.9, 142.0, 136.0, 129.9, 129.3, 126.1, 116.5, 52.1.

### 5-vinylbenzo[d][1,3]dioxole (**3g**)<sup>14</sup>

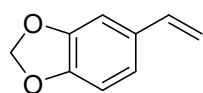

According to the general procedure B, the reaction gave **3g** in 98% yield (73 mg) as colorless liquid. <sup>1</sup>H NMR (400 MHz, CDCl<sub>3</sub>) δ 6.99 (d, *J* = 1.6 Hz, 1H), 6.86 (dd, *J* = 8.0, 1.6 Hz, 1H), 6.79 (d, *J* = 8.0 Hz, 1H), 6.65 (dd, *J* = 17.5, 10.8 Hz, 1H), 5.98 (s, 2H), 5.61 (dd, *J* = 17.5, 0.6 Hz, 1H), 5.16 (dd, *J* = 10.8, 0.5 Hz, 1H). <sup>13</sup>C NMR (126 MHz, CDCl<sub>3</sub>) δ 148.0, 147.4, 136.4, 132.2, 121.0, 112.0, 108.2, 105.4, 101.1.

### 4,4,5,5-tetramethyl-2-(4-vinylphenyl)-1,3,2-dioxaborolane (**3h**)<sup>15</sup>

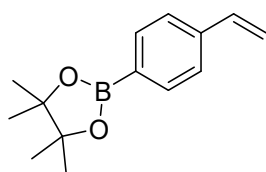

According to the general procedure B, the reaction gave **3h** in 57% yield (66 mg) as white solid. m.p. 31.4 – 31.9 °C. <sup>1</sup>H NMR (500 MHz, CDCl<sub>3</sub>) δ 7.70 (d, *J* = 7.9 Hz, 2H), 7.33 (d, *J* = 7.8 Hz, 2H), 6.64 (dd, *J* = 17.6, 10.9 Hz, 1H), 5.73 (d, *J* = 17.6 Hz, 1H), 5.20 (d, *J* = 10.8 Hz, 1H), 1.26 (s, 12H). <sup>13</sup>C NMR (126 MHz, CDCl<sub>3</sub>) δ 140.2, 136.9, 135.0, 134.7, 125.5, 114.8, 83.7, 24.8.

### Tert-butyldimethyl(4-vinylphenoxy)silane (**3i**)<sup>16</sup>

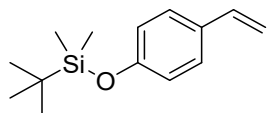

According to the general procedure B, the reaction gave **3i** in 60% yield (70 mg) as white solid. m.p. 39.0 – 39.6 °C. <sup>1</sup>H NMR (500 MHz, CDCl<sub>3</sub>) δ 7.13 – 7.05 (m, 2H), 6.59 (d, *J* = 8.5 Hz, 2H), 6.46 (dd, *J* = 17.6, 10.8 Hz, 1H), 5.40 (dd, *J* = 17.6, 1.0 Hz, 1H), 4.92 (dd, *J* = 10.8, 1.1 Hz, 1H), 0.79 (s, 9H), -0.00 (s, 6H). <sup>13</sup>C NMR (126 MHz, CDCl<sub>3</sub>) δ 155.5, 136.4, 131.0, 127.3, 120.1, 111.7, 25.7, 18.2, -4.4.

### 2-vinylnaphthalene (**3j**)<sup>13</sup>

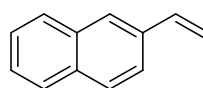

According to the general procedure B, the reaction gave **3j** in 49% yield (38 mg) as colorless liquid. <sup>1</sup>H NMR (400 MHz, CDCl<sub>3</sub>) δ 7.86 – 7.83 (m, 3H), 7.79 (d, *J* = 2.1 Hz, 1H), 7.68 (dd, *J* = 8.6, 2.1 Hz, 1H), 7.52 – 7.45 (m, 2H), 6.93 (dd, *J* = 17.6, 10.9 Hz, 1H), 5.91 (d, *J* = 17.6 Hz, 1H), 5.38 (d, *J* = 10.9 Hz, 1H). <sup>13</sup>C NMR (101 MHz, CDCl<sub>3</sub>) δ 136.9, 135.0, 133.5, 133.1, 128.1, 128.0, 127.6, 126.3, 126.2, 125.9, 123.1, 114.1.

### 2-methoxy-6-vinylnaphthalene (**3k**)<sup>11</sup>

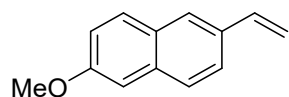

According to the general procedure B, the reaction gave **3k** in 57% yield (52 mg) as white solid. m.p. 88.8 – 89.7 °C. <sup>1</sup>H NMR (500 MHz, CDCl<sub>3</sub>) δ 7.76 – 7.67 (m, 3H), 7.64 – 7.59 (m, 1H), 7.12 (t, *J* = 3.0 Hz, 2H), 6.86 (dd, *J* = 17.5, 10.8 Hz, 1H), 5.83 (d, *J* = 17.6 Hz, 1H), 5.29 (d, *J* = 10.8 Hz, 1H), 3.93 (s, 3H). <sup>13</sup>C NMR (126 MHz, CDCl<sub>3</sub>) δ 157.8, 137.0, 134.3, 133.0, 129.6, 129.0, 127.0, 126.2, 123.8, 119.0, 113.1, 105.9, 55.3.

### 2-vinyl-9H-fluorene (**3l**)<sup>17</sup>

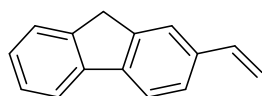

According to the general procedure B, the reaction gave **3l** in 45% yield (43 mg) as white solid. m.p. 38.3 – 38.8 °C. <sup>1</sup>H NMR (400 MHz, CDCl<sub>3</sub>) δ 7.76 (dd, *J* = 15.4, 7.7 Hz, 2H), 7.61 (s, 1H), 7.55 (d, *J* = 7.4 Hz, 1H), 7.43 (d, *J* = 8.6 Hz, 1H), 7.38 (t, *J* = 7.4 Hz, 1H), 7.30 (td, *J* = 7.4, 1.1 Hz, 1H), 6.81 (dd, *J* = 17.6, 10.9 Hz, 1H), 5.80 (dd, *J* = 17.6, 0.9 Hz, 1H), 5.26 (dd, *J* = 10.9, 0.9 Hz, 1H), 3.91 (s, 2H). <sup>13</sup>C NMR (101 MHz, CDCl<sub>3</sub>) δ 143.6, 143.5, 141.5, 141.5, 137.2, 136.3, 126.8, 126.7, 125.4, 125.1, 122.6, 119.9, 119.9, 113.2, 36.9.

### Vinylferrocene (**3m**)<sup>18</sup>

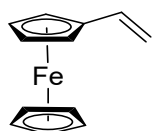

According to the general procedure B, the reaction gave **3m** in 62% yield (66 mg) as yellow oil. <sup>1</sup>H NMR (500 MHz, CDCl<sub>3</sub>) δ 6.43 (d, *J* = 9.7 Hz, 1H), 5.32 (dd, *J* = 17.8, 7.3 Hz, 1H), 5.01 (s, 1H), 4.34 (d, *J* = 7.3 Hz, 2H), 4.19 (d, *J* = 7.2 Hz, 2H), 4.09 (d, *J* = 7.6 Hz, 5H). <sup>13</sup>C NMR (126 MHz, CDCl<sub>3</sub>) δ 134.7, 111.1, 83.6, 69.2, 68.7, 66.7.

### 1-(4-vinylphenyl)-1H-pyrrole (**3n**)<sup>18</sup>

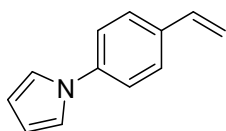

According to the general procedure B, the reaction gave **3n** in 53% yield (45 mg) as white solid. m.p. 41.2 – 41.7 °C. <sup>1</sup>H NMR (500 MHz, CDCl<sub>3</sub>) δ 7.43 (d, *J* = 8.3 Hz, 2H), 7.33 (d, *J* = 8.3 Hz, 2H), 7.07 (s, 2H), 6.70 (dd, *J* = 17.6, 10.9 Hz, 1H), 6.34 (s, 2H), 5.72 (d, *J* = 17.6 Hz, 1H), 5.24 (d, *J* = 10.9 Hz, 1H). <sup>13</sup>C NMR (126 MHz, CDCl<sub>3</sub>) δ 140.2, 135.9, 135.1, 127.4, 120.4, 119.2, 113.8, 110.6.

**(E)-hex-1-en-1-ylbenzene (3p)**<sup>19</sup>

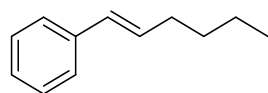

According to the general procedure B, the reaction gave **3p** in 98% yield (78 mg) as colorless liquid. <sup>1</sup>H NMR (500 MHz, CDCl<sub>3</sub>) δ 7.26 (d, *J* = 7.5 Hz, 2H), 7.21 (t, *J* = 7.6 Hz, 2H), 7.11 (t, *J* = 7.2 Hz, 1H), 6.30 (d, *J* = 15.8 Hz, 1H), 6.15 (dt, *J* = 15.8, 6.9 Hz, 1H), 2.14 (q, *J* = 6.9 Hz, 2H), 1.41 – 1.36 (m, 2H), 1.34 – 1.28 (m, 2H), 0.85 (t, *J* = 7.3 Hz, 3H). <sup>13</sup>C NMR (126 MHz, CDCl<sub>3</sub>) δ 138.0, 131.2, 129.7, 128.5, 126.8, 125.9, 32.7, 31.6, 22.3, 14.0.

**(E)-dodec-1-en-1-ylbenzene (3q)**<sup>20</sup>

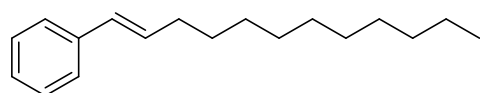

According to the general procedure B, the reaction gave **3q** in 99% yield (121 mg) as colorless liquid. <sup>1</sup>H NMR (400 MHz, CDCl<sub>3</sub>) δ 7.36 (d, *J* = 7.4 Hz, 2H), 7.30 (t, *J* = 7.6 Hz, 2H), 7.20 (t, *J* = 7.2 Hz, 1H), 6.40 (d, *J* = 15.8 Hz, 1H), 6.25 (dt, *J* = 15.8, 6.8 Hz, 1H), 2.22 (q, *J* = 7.0 Hz, 2H), 1.49 (p, *J* = 7.1 Hz, 2H), 1.31 (d, *J* = 15.9 Hz, 14H), 0.91 (t, *J* = 6.7 Hz, 3H). <sup>13</sup>C NMR (101 MHz, CDCl<sub>3</sub>) δ 138.0, 131.2, 129.7, 128.4, 126.7, 125.9, 33.1, 31.9, 29.6, 29.5, 29.4, 29.4, 29.2, 22.7, 14.1.

**(E)-tert-butyldimethyl((6-phenylhex-5-en-1-yl)oxy)silane (3r)**<sup>21</sup>

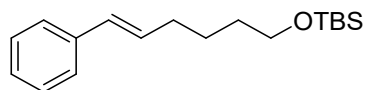

According to the general procedure B, the reaction gave **3r** in 84% yield (121 mg) as colorless oil. <sup>1</sup>H NMR (500 MHz, CDCl<sub>3</sub>) δ 7.28 (d, *J* = 7.5 Hz, 2H), 7.22 (t, *J* = 7.6 Hz, 2H), 7.12 (t, *J* = 7.2 Hz, 1H), 6.32 (d, *J* = 15.8 Hz, 1H), 6.21 – 6.11 (m, 1H), 3.58 (t, *J* = 6.3 Hz, 2H), 2.17 (q, *J* = 7.0 Hz, 2H), 1.61 – 1.39 (m, 4H), 0.85 (s, 9H), 0.00 (s, 6H). <sup>13</sup>C NMR (126 MHz, CDCl<sub>3</sub>) δ 137.9, 130.9, 130.0, 128.5, 126.8, 126.0, 63.1, 32.8, 32.4, 26.0, 25.7, 18.4, -5.2.

**(E)-N,N-dimethyl-4-((6-phenylhex-5-en-1-yl)oxy)aniline (3s)**

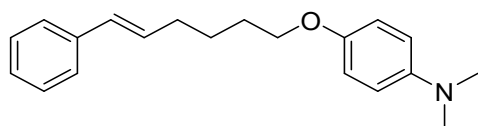

According to the general procedure B, the reaction gave **3s** in 79% yield (117 mg) as yellow oil. <sup>1</sup>H NMR (500 MHz, CDCl<sub>3</sub>) δ 7.36 – 7.25 (m, 4H), 7.17 (t, *J* = 7.2 Hz, 1H), 6.83 (d, *J* = 8.8 Hz, 2H), 6.73 (d, *J* = 8.7

Hz, 2H), 6.39 (d,  $J = 15.8$  Hz, 1H), 6.22 (dt,  $J = 15.4, 6.8$  Hz, 1H), 3.92 (t,  $J = 6.4$  Hz, 2H), 2.84 (s, 6H), 2.27 (q,  $J = 7.0$  Hz, 2H), 1.80 (p,  $J = 6.6$  Hz, 2H), 1.64 (p,  $J = 7.4$  Hz, 2H).  $^{13}\text{C}$  NMR (126 MHz,  $\text{CDCl}_3$ )  $\delta$  151.5, 145.8, 137.9, 130.6, 130.2, 128.5, 126.9, 126.0, 115.5, 115.0, 68.5, 41.9, 32.8, 29.0, 25.9. HRMS (ESI-quadrupole)  $m/z$ :  $[\text{M}+\text{H}]^+$  Calcd. For  $\text{C}_{20}\text{H}_{26}\text{NO}$  296.2009; found: 296.2009.

**(E)-pent-1-ene-1,3-diylidibenzene (3t)**

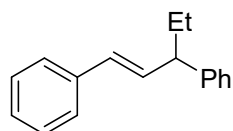

According to the general procedure B, the reaction gave **3t** in 70% yield (78 mg) as yellow oil.  $^1\text{H}$  NMR (400 MHz,  $\text{CDCl}_3$ )  $\delta$  7.36

- 7.17 (m, 10H), 6.36 (dt,  $J = 15.8, 11.6$  Hz, 2H), 3.32 (q,  $J = 7.3$

Hz, 1H), 1.86 - 1.80 (m, 2H), 0.92 (t,  $J = 7.4$  Hz, 3H).  $^{13}\text{C}$  NMR (101 MHz,  $\text{CDCl}_3$ )

$\delta$  144.6, 137.6, 134.3, 129.5, 128.5, 127.7, 127.0, 126.21, 126.15, 51.0, 28.8, 12.3.

**1,1,2,4,4,7-hexamethyl-6-vinyl-1,2,3,4-tetrahydronaphthalene (3aa)<sup>22</sup>**

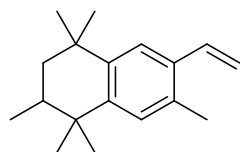

According to the general procedure B, the reaction gave **3aa** in 40% yield (24 mg) as colorless oil.  $^1\text{H}$  NMR (500 MHz,  $\text{CDCl}_3$ )

$\delta$  7.43 (s, 1H), 7.15 (s, 1H), 6.92 (dd,  $J = 17.4, 11.0$  Hz, 1H),

5.62 (d,  $J = 17.4$  Hz, 1H), 5.27 (d,  $J = 11.0$  Hz, 1H), 2.34 (s, 3H), 1.90 (m,  $J = 13.1,$

6.7, 2.6 Hz, 1H), 1.66 (t,  $J = 13.2$  Hz, 1H), 1.39 (dd,  $J = 13.5, 2.6$  Hz, 1H), 1.35 (s,

6H), 1.30 (s, 3H), 1.09 (s, 3H), 1.01 (d,  $J = 6.8$  Hz, 3H).  $^{13}\text{C}$  NMR (126 MHz,  $\text{CDCl}_3$ )

$\delta$  145.7, 142.5, 135.1, 134.2, 132.5, 128.7, 123.4, 114.3, 43.8, 37.5, 34.6, 34.1, 32.5,

32.1, 28.6, 24.9, 19.5, 16.8.

**1-((3,7-dimethyloct-6-en-1-yl)oxy)-4-vinylbenzene (3ab)<sup>23</sup>**

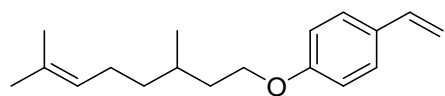

According to the general procedure B, the reaction gave **3ab** in 62% yield (80 mg) as

colorless oil.  $^1\text{H}$  NMR (500 MHz,  $\text{CDCl}_3$ )  $\delta$  7.32 (d,  $J = 8.7$  Hz, 2H), 6.94 - 6.80 (m,

2H), 6.65 (dd,  $J = 17.6, 10.9$  Hz, 1H), 5.59 (dd,  $J = 17.6, 1.0$  Hz, 1H), 5.21 - 5.03 (m,

2H), 3.99 (q,  $J = 6.6$  Hz, 2H), 2.01 (dq,  $J = 15.9, 7.4$  Hz, 2H), 1.89-1.79 (m, 1H),

1.73-1.66 (m, 3H), 1.61 (s, 3H), 1.49-1.35 (m, 1H), 1.35-1.14 (m, 3H), 0.95 (d,  $J =$

6.6 Hz, 3H).  $^{13}\text{C}$  NMR (126 MHz,  $\text{CDCl}_3$ )  $\delta$  159.0, 136.3, 131.3, 130.3, 127.4, 124.7, 114.5, 111.4, 66.4, 37.2, 36.2, 29.6, 25.7, 25.4, 19.6, 17.7.

**(1R,2S,5R)-2-isopropyl-5-methylcyclohexyl 4-vinylbenzoate (3ac)**

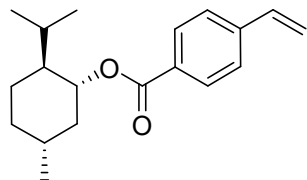

According to the general procedure C, the reaction gave **3ac** in 45% yield (64 mg) as colorless oil.  $^1\text{H}$  NMR (500 MHz,  $\text{CDCl}_3$ )  $\delta$  8.00 (d,  $J = 8.4$  Hz, 2H), 7.46 (d,  $J = 8.4$  Hz, 2H), 6.75 (dd,  $J = 17.6, 10.9$  Hz, 1H), 5.85 (d,  $J = 17.6$  Hz, 1H), 5.37 (d,  $J = 10.9$  Hz, 1H), 4.93 (td,  $J = 10.8, 4.4$  Hz, 1H), 2.13 (dd,  $J = 12.1, 1.8$  Hz, 1H), 1.96 (td,  $J = 7.0, 2.8$  Hz, 1H), 1.73 (dd,  $J = 11.7, 2.7$  Hz, 2H), 1.60 – 1.49 (m, 2H), 1.25 (t,  $J = 7.6$  Hz, 1H), 1.17 – 1.07 (m, 2H), 0.92 (t,  $J = 6.4$  Hz, 6H), 0.79 (d,  $J = 7.0$  Hz, 3H).  $^{13}\text{C}$  NMR (126 MHz,  $\text{CDCl}_3$ )  $\delta$  165.8, 141.7, 136.1, 129.8, 127.8, 126.0, 116.3, 74.8, 47.3, 41.0, 34.3, 31.4, 26.5, 23.6, 22.0, 20.7, 16.5. HRMS (ESI-quadrupole)  $m/z$ :  $[\text{M}+\text{H}]^+$  Calcd. For  $\text{C}_{19}\text{H}_{27}\text{O}_2$  287.2006; found: 287.1998.

**(1S,2R,4S)-1,7,7-trimethylbicyclo[2.2.1]heptan-2-yl 4-vinylbenzoate (3ad)**

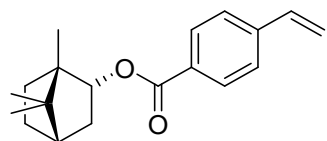

According to the general procedure B, the reaction gave **3ad** in 44% yield (62 mg) as yellow oil.  $^1\text{H}$  NMR (500 MHz,  $\text{CDCl}_3$ )  $\delta$  7.93 (d,  $J = 8.2$  Hz, 2H), 7.38 (d,  $J = 8.3$  Hz, 2H), 6.67 (dd,  $J = 17.6, 10.9$  Hz, 1H), 5.77 (d,  $J = 17.6$  Hz, 1H), 5.29 (d,  $J = 10.8$  Hz, 1H), 5.03 (m,  $J = 9.9, 3.5, 2.2$  Hz, 1H), 2.44 – 2.35 (m, 1H), 2.05 (m,  $J = 13.3, 9.5, 4.4$  Hz, 1H), 1.72 (m,  $J = 12.2, 8.1, 4.0$  Hz, 1H), 1.65 (t,  $J = 4.5$  Hz, 1H), 1.37 – 1.29 (m, 1H), 1.23 (m,  $J = 12.4, 9.5, 4.5$  Hz, 1H), 1.04 (dd,  $J = 13.8, 3.5$  Hz, 1H), 0.89 (s, 3H), 0.83 (s, 6H).  $^{13}\text{C}$  NMR (126 MHz,  $\text{CDCl}_3$ )  $\delta$  166.5, 141.7, 136.0, 130.0, 129.8, 126.0, 116.3, 80.4, 49.1, 47.8, 45.0, 36.9, 28.1, 27.4, 19.7, 18.9. HRMS (ESI-quadrupole)  $m/z$ :  $[\text{M}+\text{H}]^+$  Calcd. For  $\text{C}_{19}\text{H}_{25}\text{O}_2$  285.1849; found: 285.1847.

**(3aS,5S,6R,6aS)-5-((R)-2,2-dimethyl-1,3-dioxolan-4-yl)-2,2-dimethyltetrahydrofuro[2,3-d][1,3]dioxol-6-yl 4-vinylbenzoate (3ae)**

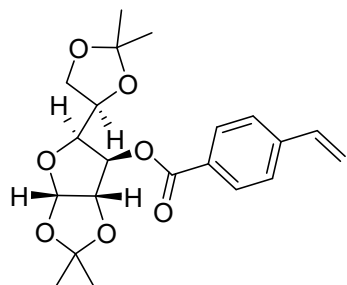

According to the general procedure C, the reaction gave **3ae** in 34% yield (66 mg) as colorless oil.  $^1\text{H}$  NMR (400

MHz, CDCl<sub>3</sub>)  $\delta$  8.00 (d,  $J$  = 8.3 Hz, 2H), 7.50 (d,  $J$  = 8.3 Hz, 2H), 6.78 (dd,  $J$  = 17.6, 10.9 Hz, 1H), 5.98 (d,  $J$  = 3.7 Hz, 1H), 5.90 (d,  $J$  = 17.6 Hz, 1H), 5.52 (d,  $J$  = 2.6 Hz, 1H), 5.43 (d,  $J$  = 10.9 Hz, 1H), 4.66 (d,  $J$  = 3.7 Hz, 1H), 4.41 – 4.34 (m, 2H), 4.16 – 4.09 (m, 2H), 1.58 (s, 3H), 1.44 (s, 3H), 1.35 (s, 3H), 1.29 (s, 3H). <sup>13</sup>C NMR (126 MHz, CDCl<sub>3</sub>)  $\delta$  164.9, 142.4, 135.8, 130.0, 128.5, 126.2, 116.9, 112.3, 109.3, 105.1, 83.3, 79.9, 72.5, 67.2, 26.8, 26.7, 26.1, 25.1. HRMS (ESI-quadrupole)  $m/z$ : [M+H]<sup>+</sup> Calcd. For C<sub>21</sub>H<sub>27</sub>O<sub>7</sub> 391.1751; found: 391.1741.

#### triethyl(1-(*p*-tolyl)ethyl)silane (**4a**)<sup>24</sup>

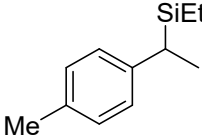 According to the general procedure C, the reaction gave **4a** in 68% yield (80 mg) as colorless oil. <sup>1</sup>H NMR (500 MHz, CDCl<sub>3</sub>)  $\delta$  7.06 (d,  $J$  = 7.9 Hz, 2H), 6.98 (d,  $J$  = 8.1 Hz, 2H), 2.31 (s, 3H), 2.28 (q,  $J$  = 7.7 Hz, 1H), 1.37 (d,  $J$  = 7.6 Hz, 3H), 0.92 (t,  $J$  = 8.0 Hz, 9H), 0.53 (q,  $J$  = 7.9 Hz, 6H). <sup>13</sup>C NMR (126 MHz, CDCl<sub>3</sub>)  $\delta$  143.1, 133.4, 128.7, 127.0, 26.3, 20.9, 15.6, 7.5, 2.1.

#### (1-([1,1'-biphenyl]-4-yl)ethyl)triethylsilane (**4b**)<sup>24</sup>

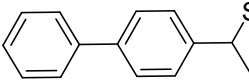 According to the general procedure C, the reaction gave **4b** in 60% yield (89 mg) as white solid. m.p. 34.2 – 34.9 °C. <sup>1</sup>H NMR (500 MHz, CDCl<sub>3</sub>)  $\delta$  7.63 (d,  $J$  = 7.2 Hz, 2H), 7.52 (d,  $J$  = 8.4 Hz, 2H), 7.45 (t,  $J$  = 7.7 Hz, 2H), 7.35 – 7.32 (m, 1H), 7.18 (d,  $J$  = 8.1 Hz, 2H), 2.40 (q,  $J$  = 7.6 Hz, 1H), 1.45 (d,  $J$  = 7.6 Hz, 3H), 0.95 (t,  $J$  = 8.0 Hz, 9H), 0.58 (q,  $J$  = 7.9 Hz, 6H). <sup>13</sup>C NMR (126 MHz, CDCl<sub>3</sub>)  $\delta$  145.5, 141.2, 137.0, 128.6, 127.5, 126.8, 126.7, 126.6, 26.6, 15.4, 7.5, 2.1.

#### Triethyl(1-(4-methoxyphenyl)ethyl)silane (**4c**)<sup>24</sup>

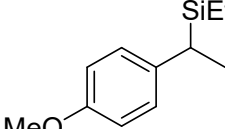 According to the general procedure C, the reaction gave **4c** in 50% yield (63 mg) as colorless oil. <sup>1</sup>H NMR (500 MHz, CDCl<sub>3</sub>)  $\delta$  6.98 (d,  $J$  = 8.6 Hz, 2H), 6.79 (d,  $J$  = 8.6 Hz, 2H), 3.77 (s, 3H), 2.24 (q,  $J$  = 7.6 Hz, 1H), 1.36 – 1.31 (m, 3H), 0.94 – 0.86 (m, 9H), 0.50 (q,  $J$  = 8.1 Hz, 6H). <sup>13</sup>C NMR (126 MHz, CDCl<sub>3</sub>)  $\delta$  156.7, 138.3, 127.8, 113.5, 55.2, 25.7, 15.7, 7.5,

2.1. **HRMS** (ESI-quadrupole)  $m/z$ :  $[M+H]^+$  Calcd. For  $C_{15}H_{27}OSi$  251.1826; found: 251.1827.

**Butyl 4-(1-(triethylsilyl)ethyl)benzoate (4d)**

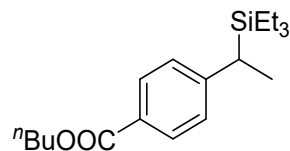

According to the general procedure C, the reaction gave **4d** in 68% yield (109 mg) as colorless oil.  **$^1H$  NMR** (500 MHz,  $CDCl_3$ )  $\delta$  7.90 (t,  $J = 25.8$ , 2H), 7.12 (d,  $J = 8.3$  Hz, 2H), 4.30 (t,  $J = 6.6$  Hz, 2H), 2.40 (q,  $J = 7.4$  Hz, 1H), 1.77 – 1.71 (m, 2H), 1.48 (q,  $J = 7.5$  Hz, 2H), 1.39 (dd,  $J = 7.5$ , 3.7 Hz, 3H), 0.98 (t,  $J = 7.4$  Hz, 3H), 0.89 (t,  $J = 7.9$  Hz, 9H), 0.51 (q,  $J = 8.0$  Hz, 6H).  **$^{13}C$  NMR** (126 MHz,  $CDCl_3$ )  $\delta$  166.9, 152.3, 129.4, 126.9, 64.5, 30.8, 28.2, 27.7, 19.3, 15.1, 13.8, 7.4, 2.0. **HRMS** (ESI-quadrupole)  $m/z$ :  $[M+H]^+$  Calcd. For  $C_{19}H_{33}O_2Si$  321.2244; found: 321.2245.

**(1-(benzo[d][1,3]dioxol-5-yl)ethyl)triethylsilane (4e)**

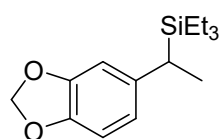

According to the general procedure C, the reaction gave **4e** in 51% yield (67 mg) as colorless oil.  **$^1H$  NMR** (500 MHz,  $CDCl_3$ )  $\delta$  6.69 (d,  $J = 8.0$  Hz, 1H), 6.58 (d,  $J = 1.8$  Hz, 1H), 6.51 (dd,  $J = 8.0$ , 1.8 Hz, 1H), 5.89 (s, 2H), 2.22 (q,  $J = 7.6$  Hz, 1H), 1.32 (d,  $J = 7.6$  Hz, 3H), 0.90 (t,  $J = 8.0$  Hz, 9H), 0.51 (q,  $J = 7.9$  Hz, 6H).  **$^{13}C$  NMR** (126 MHz,  $CDCl_3$ )  $\delta$  147.3, 144.4, 140.3, 119.6, 107.9, 107.7, 100.5, 26.5, 15.9, 7.5, 2.1. **HRMS** (ESI-quadrupole)  $m/z$ :  $[M+H]^+$  Calcd. For  $C_{15}H_{25}O_2Si$  265.1618; found: 165.1619.

**Triethyl(1-(4-(4,4,5,5-tetramethyl-1,3,2-dioxaborolan-2-yl)phenyl)ethyl)silane**

**(4f)**<sup>24</sup>

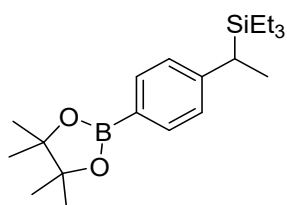

According to the general procedure C, the reaction gave **4f** in 50% yield (87 mg) as colorless oil.  **$^1H$  NMR** (400 MHz,  $CDCl_3$ )  $\delta$  7.71 (d,  $J = 8.0$  Hz, 2H), 7.11 (d,  $J = 8.0$  Hz, 2H), 2.37 (q,  $J = 7.5$  Hz, 1H), 1.40 (d,  $J = 7.5$  Hz, 3H), 1.36 (s, 12H), 0.91 (t,  $J = 7.9$  Hz, 9H), 0.53 (q,  $J = 7.9$  Hz, 6H).  **$^{13}C$  NMR** (126 MHz,  $CDCl_3$ )  $\delta$  150.1, 134.6, 126.6, 83.5, 27.4, 24.86, 24.85, 15.2, 7.5, 2.0.

**Tert-butyldimethyl(4-(1-(triethylsilyl)ethyl)phenoxy)silane (4g)**



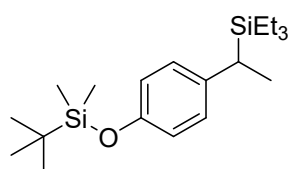

According to the general procedure C, the reaction gave **4g** in 57% yield (100 mg) as colorless liquid.  $^1\text{H NMR}$  (500 MHz,  $\text{CDCl}_3$ )  $\delta$  6.74 (d,  $J = 8.5$  Hz, 2H), 6.54 (d,  $J = 8.5$  Hz, 2H), 2.05 (q,  $J = 7.6$  Hz, 1H), 1.16 (d,  $J = 7.7$  Hz, 3H), 0.81 (d,  $J = 2.8$  Hz, 9H), 0.70 (t,  $J = 8.0$  Hz, 9H), 0.32 (q,  $J = 7.9$  Hz, 6H), -0.00 (s, 6H).  $^{13}\text{C NMR}$  (126 MHz,  $\text{CDCl}_3$ )  $\delta$  150.33, 136.71, 125.64, 117.53, 23.69, 23.64, 16.10, 13.53, 5.38, 0.00, -6.53. **HRMS** (ESI-quadrupole)  $m/z$ :  $[\text{M}+\text{H}]^+$  Calcd. For  $\text{C}_{20}\text{H}_{39}\text{OSi}_2$  351.2534; found: 351.2537.

#### Triethyl(1-(naphthalen-1-yl)ethyl)silane (**4h**)

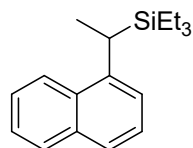

According to the general procedure C, the reaction gave **4h** in 93% yield (126 mg) as colorless liquid.  $^1\text{H NMR}$  (500 MHz,  $\text{CDCl}_3$ )  $\delta$  8.14 (d,  $J = 8.2$  Hz, 1H), 7.88 (dd,  $J = 7.4, 2.0$  Hz, 1H), 7.66 (d,  $J = 8.1$  Hz, 1H), 7.54–7.47 (m, 3H), 7.36 (d,  $J = 7.2$  Hz, 1H), 3.29 (q,  $J = 7.4$  Hz, 1H), 1.58 (dd,  $J = 7.4, 1.8$  Hz, 3H), 0.89 (t,  $J = 7.9$ , 9H), 0.65–0.50 (m, 6H).  $^{13}\text{C NMR}$  (126 MHz,  $\text{CDCl}_3$ )  $\delta$  143.3, 133.9, 131.7, 128.9, 125.5, 125.2, 125.1, 124.7, 123.7, 123.6, 16.7, 7.5, 2.5. **HRMS** (ESI-quadrupole)  $m/z$ :  $[\text{M}+\text{H}]^+$  Calcd. For  $\text{C}_{18}\text{H}_{27}\text{Si}$  271.1877; found: 271.1874.

#### Triethyl(1-(naphthalen-2-yl)ethyl)silane (**4i**)<sup>24</sup>

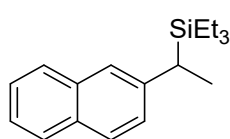

According to the general procedure C, the reaction gave **4i** in 88% yield (119 mg) as colorless liquid.  $^1\text{H NMR}$  (500 MHz,  $\text{CDCl}_3$ )  $\delta$  7.85–7.77 (m, 3H), 7.56 (s, 1H), 7.51 – 7.42 (m, 2H), 7.32 (d,  $J = 8.5$  Hz, 1H), 2.56 (q,  $J = 7.5$  Hz, 1H), 1.55 (d,  $J = 7.6$  Hz, 3H), 0.98 (t,  $J = 8.0$  Hz, 9H), 0.62 (q,  $J = 8.0$  Hz, 6H).  $^{13}\text{C NMR}$  (126 MHz,  $\text{CDCl}_3$ )  $\delta$  144.1, 133.8, 131.3, 127.5, 127.3, 127.2, 127.1, 125.7, 124.4, 124.3, 27.1, 15.5, 7.5, 2.2.

#### Triethyl(1-(6-methoxynaphthalen-2-yl)ethyl)silane (**4j**)<sup>25</sup>

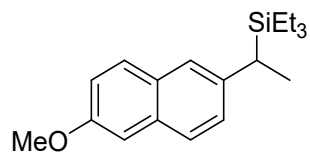

According to the general procedure C, the reaction gave **4j** in 57% yield (86 mg) as white solid. m.p. 52.4 – 52.9 °C.  $^1\text{H NMR}$  (500 MHz,  $\text{CDCl}_3$ )  $\delta$  7.70 (dd,  $J = 15.9, 8.6$  Hz, 2H),

7.49 (s, 1H), 7.29 (dd,  $J = 8.4, 1.7$  Hz, 1H), 7.20 – 7.16 (m, 2H), 3.96 (s, 3H), 2.51 (q,  $J = 7.6$ , 1H), 1.54 (d,  $J = 7.6$ , 3H), 0.98 (t,  $J = 7.9$ , 9H), 0.62 (q,  $J = 7.9$ , 6H).  $^{13}\text{C}$  NMR (126 MHz,  $\text{CDCl}_3$ )  $\delta$  156.7, 141.6, 132.1, 129.3, 128.7, 127.5, 126.2, 124.2, 118.4, 105.6, 55.3, 26.7, 15.6, 7.5, 2.2.

**(1-(9H-fluoren-2-yl)ethyl)triethylsilane (4k)**<sup>26</sup>

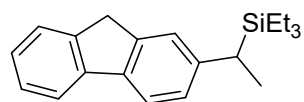

According to the general procedure C, the reaction gave **4k** in 63% yield (97 mg) as white solid. m.p. 43.1 – 43.8 °C.  $^1\text{H}$

NMR (400 MHz,  $\text{CDCl}_3$ )  $\delta$  7.69 (d,  $J = 7.5$  Hz, 1H), 7.62 (d,  $J = 7.9$  Hz, 1H), 7.48 (d,  $J = 7.4$  Hz, 1H), 7.31 (t,  $J = 7.4$  Hz, 1H), 7.24 – 7.20 (m, 2H), 7.06 (d,  $J = 7.9$  Hz, 1H), 3.83 (s, 2H), 2.37 (q,  $J = 7.5$  Hz, 1H), 1.41 (d,  $J = 7.5$  Hz, 3H), 0.88 (t,  $J = 7.9$  Hz, 9H), 0.52 (q,  $J = 7.9$  Hz, 6H).  $^{13}\text{C}$  NMR (126 MHz,  $\text{CDCl}_3$ )  $\delta$  145.3, 143.3, 142.9, 142.0, 138.1, 126.6, 125.9, 125.8, 124.9, 123.6, 119.6, 119.3, 36.8, 27.1, 15.7, 7.5, 2.1.

**1-Ferrocenyl-1-(triethylsilyl)ethane (4l)**<sup>24</sup>

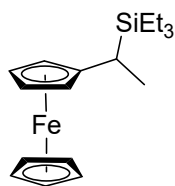

According to the general procedure C, the reaction gave **4l** in 51% yield (84 mg) as yellow oil.  $^1\text{H}$  NMR (500 MHz,  $\text{CDCl}_3$ )  $\delta$  4.33 – 4.11 (m, 9H), 1.83 (s, 1H), 1.10 (s, 3H), 0.90 (d,  $J = 12.3$  Hz, 9H),

0.56 – 0.50 (m, 6H).  $^{13}\text{C}$  NMR (126 MHz,  $\text{CDCl}_3$ )  $\delta$  68.1, 67.3, 66.1, 18.7, 15.0, 7.5, 2.0.

**1-(4-(1-(triethylsilyl)ethyl)phenyl)-1H-pyrrole (4m)**

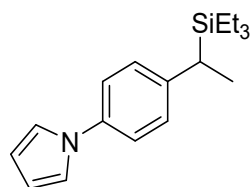

According to the general procedure C, the reaction gave **4m** in 58% yield (83 mg) as colorless oil.  $^1\text{H}$  NMR (500 MHz,  $\text{CDCl}_3$ )  $\delta$  7.26 (d,  $J = 8.3$  Hz, 2H), 7.10 (d,  $J = 8.3$  Hz, 2H), 7.05 (s, 2H), 6.31 (s, 2H), 2.33 (q,  $J = 7.6$  Hz, 1H), 1.39 (d,  $J = 7.6$  Hz, 3H),

0.90 (t,  $J = 8.0$  Hz, 9H), 0.53 (q,  $J = 7.9$  Hz, 6H).  $^{13}\text{C}$  NMR (126 MHz,  $\text{CDCl}_3$ )  $\delta$  143.9, 137.5, 127.9, 120.3, 119.3, 109.9, 26.4, 15.5, 7.5, 2.1. HRMS (ESI-quadrupole) m/z:[M+H]<sup>+</sup> Calcd. For  $\text{C}_{18}\text{H}_{28}\text{NSi}$  286.1986; found: 286.1986.

**Triethyl(1-(2-methyl-5-phenylfuran-3-yl)ethyl)silane (4n)**

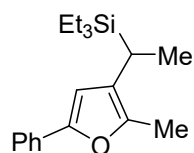

According to the general procedure C, the reaction gave **4n** in 40% yield (60 mg) as yellow oil. **<sup>1</sup>H NMR** (500 MHz, CDCl<sub>3</sub>) δ 7.61 – 7.60 (m, 2H), 7.33 (t, *J* = 7.6 Hz, 2H), 7.17 (t, *J* = 7.4, 1H), 6.43 (s, 1H), 2.26 (s, 3H), 2.04 (q, *J* = 7.6 Hz, 1H), 1.27 (d, *J* = 7.5 Hz, 3H), 0.94 (t, *J* = 7.9 Hz, 9H), 0.56 (q, *J* = 7.9, 6H). **<sup>13</sup>C NMR** (126 MHz, CDCl<sub>3</sub>) δ 150.9, 145.0, 131.3, 128.5, 126.4, 124.7, 123.1, 106.4, 16.0, 15.8, 12.0, 7.5, 2.3. **HRMS** (ESI-quadrupole) *m/z*: [M+H]<sup>+</sup> Calcd. For C<sub>19</sub>H<sub>29</sub>OSi 301.1982; found: 301.1982.

#### Triethyl(1-phenylbutyl)silane (**4o**)<sup>27</sup>

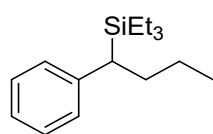

According to the general procedure C, the reaction gave **4o** in 86% yield (107 mg) as colorless oil. **<sup>1</sup>H NMR** (500 MHz, CDCl<sub>3</sub>) δ 7.22 (t, *J* = 7.3 Hz, 2H), 7.06 (t, *J* = 6.7 Hz, 3H), 2.17 (dd, *J* = 12.4, 3.2 Hz, 1H), 1.91 – 1.79 (m, 1H), 1.65 (m, *J* = 13.9, 7.1, 3.4 Hz, 1H), 1.32 (m, *J* = 13.9, 6.9, 3.4 Hz, 1H), 1.16 – 1.06 (m, 1H), 0.89 (t, *J* = 8.0 Hz, 9H), 0.84 (t, *J* = 7.3 Hz, 3H), 0.51 (q, *J* = 7.9 Hz, 6H). **<sup>13</sup>C NMR** (126 MHz, CDCl<sub>3</sub>) δ 144.1, 128.0, 127.9, 124.1, 33.7, 32.0, 22.3, 13.9, 7.5, 2.3.

#### Triethyl(1-phenylhexyl)silane (**4p**)

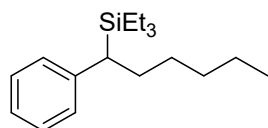

According to the general procedure C, the reaction gave **4p** in 75% yield (104 mg) as colorless oil. **<sup>1</sup>H NMR** (500 MHz, CDCl<sub>3</sub>) δ 7.21 (t, *J* = 7.4 Hz, 2H), 7.05 (t, *J* = 8.1 Hz, 3H), 2.13 (dd, *J* = 12.6, 3.3 Hz, 1H), 1.88 – 1.77 (m, 1H), 1.70 – 1.64 (m, *J* = 9.3, 3.5 Hz, 1H), 1.35 – 1.05 (m, 6H), 0.88 (t, *J* = 7.9 Hz, 9H), 0.82 (t, *J* = 5.9 Hz, 3H), 0.49 (q, *J* = 7.9 Hz, 6H). **<sup>13</sup>C NMR** (126 MHz, CDCl<sub>3</sub>) δ 144.1, 128.0, 127.9, 124.1, 34.1, 31.7, 29.7, 29.1, 22.5, 14.1, 7.5, 2.3.

#### Triethyl(1-phenyldodecyl)silane (**4q**)

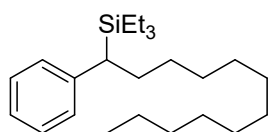

According to the general procedure C, the reaction gave **4q** in 59% yield (106 mg) as colorless oil. **<sup>1</sup>H NMR** (500 MHz, CDCl<sub>3</sub>) δ 7.21 (t, *J* = 7.5 Hz, 2H), 7.05 (t, *J* = 8.2 Hz, 3H), 2.13 (dd, *J* = 12.4, 3.2 Hz, 1H), 1.29 – 1.18 (m, 20H), 0.87 (t, *J* = 7.8 Hz, 12H), 0.49 (q, *J* = 7.9 Hz, 6H). **<sup>13</sup>C NMR** (126 MHz, CDCl<sub>3</sub>) δ 144.1, 128.0, 127.9, 124.1, 34.1, 31.9,

29.7, 29.7, 29.6, 29.6, 29.5, 29.4, 29.3, 26.2, 22.7, 14.1, 7.5, 2.3. **HRMS** (ESI-quadrupole)  $m/z$ :  $[M+H]^+$  Calcd. For  $C_{24}H_{45}Si$  361.3285; found: 361.3286.

#### **N,N-dimethyl-4-((6-phenyl-6-(triethylsilyl)hexyl)oxy)aniline (4r)**

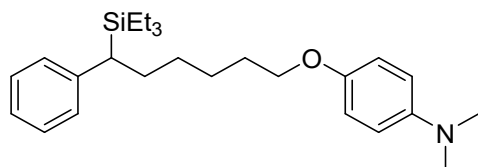

According to the general procedure C, the reaction gave **4r** in 54% yield (111 mg) as colorless oil.  **$^1H$  NMR** (500 MHz,  $CDCl_3$ )  $\delta$  7.21 (t,  $J = 7.6$  Hz, 2H), 7.05 (t,  $J = 8.4$  Hz, 2H), 6.80 (d,  $J = 8.5$  Hz, 2H), 6.72 (d,  $J = 9.2$  Hz, 2H), 3.82 (t,  $J = 6.5$  Hz, 2H), 2.84 (d,  $J = 1.5$  Hz, 6H), 2.14 (dd,  $J = 12.5, 3.2$  Hz, 1H), 1.85 (m 1H), 1.77 – 1.59 (m, 3H), 1.51 – 1.24 (m, 4H), 1.22 – 1.10 (m, 1H), 0.88 (t,  $J = 7.9$  Hz, 9H), 0.49 (q,  $J = 7.9$  Hz, 6H).  **$^{13}C$  NMR** (126 MHz,  $CDCl_3$ )  $\delta$  151.5, 145.6, 143.9, 128.0, 127.9, 124.2, 115.4, 114.9, 68.6, 41.8, 34.0, 29.6, 29.3, 29.1, 25.9, 7.5, 2.3. **HRMS** (ESI-quadrupole)  $m/z$ :  $[M+H]^+$  Calcd. For  $C_{26}H_{42}NOSi$  412.3030; found: 412.3032.

#### **Tert-butyldimethyl((6-phenyl-6-(triethylsilyl)hexyl)oxy)silane (4s)**

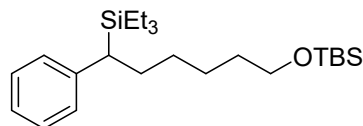

According to the general procedure C, the reaction gave **4s** in 45% yield (92mg) as colorless oil.  **$^1H$  NMR** (500 MHz,  $CDCl_3$ )  $\delta$  7.22 (t,  $J = 7.5$  Hz, 2H), 7.11 – 7.02 (m, 2H), 3.54 (t,  $J = 6.6$  Hz, 2H), 2.14 (dd,  $J = 12.5, 3.2$  Hz, 1H), 1.84 (q,  $J = 12.7$  Hz, 1H), 1.74 – 1.64 (m, 1H), 1.44 (dq,  $J = 14.4, 7.1$  Hz, 2H), 1.37 – 1.19 (m, 4H), 1.13 – 1.08 (m, 1H), 0.91 – 0.86 (m, 18H), 0.50 (q,  $J = 7.9$  Hz, 6H), 0.03 (s, 6H).  **$^{13}C$  NMR** (126 MHz,  $CDCl_3$ )  $\delta$  144.0, 128.0, 127.9, 124.2, 63.3, 34.0, 32.7, 29.7, 29.1, 26.0, 25.6, 7.5, 2.3, -5.3. **HRMS** (ESI-quadrupole)  $m/z$ :  $[M+H]^+$  Calcd. For  $C_{24}H_{47}OSi_2$  407.3160; found: 407.3160.

#### **(1,3-diphenylpentyl)triethylsilane (4t)**

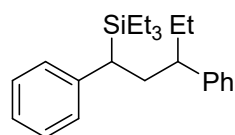

According to the general procedure C, the reaction gave **4t** in 44% yield (74 mg) as yellow oil.  **$^1H$  NMR** (400 MHz,  $CDCl_3$ )  $\delta$  7.34 – 7.09 (m, 8H), 7.03 (dd,  $J = 13.0, 4.9$  Hz, 2H), 2.50 – 2.15 (m, 2H), 2.01 – 1.83 (m, 2H), 1.65 – 1.47 (m, 2H), 0.93 (t,  $J = 7.9$  Hz, 3H), 0.81 (t,  $J = 7.9$

Hz, 6H), 0.71 (dt,  $J = 23.0, 7.4$  Hz, 3H), 0.59 – 0.44 (m, 3H).  $^{13}\text{C}$  NMR (101 MHz,  $\text{CDCl}_3$ )  $\delta$  146.7, 145.0, 143.7, 128.2, 128.1, 127.6, 125.9, 124.3, 46.1, 36.6, 31.3, 30.5, 12.3, 7.4, 2.3. HRMS (ESI-quadrupole)  $m/z$ :  $[\text{M}+\text{H}]^+$  Calcd. For  $\text{C}_{23}\text{H}_{35}\text{Si}$  339.2503; found: 339.2497.

**(cyclohexyl(phenyl)methyl)triethylsilane (4u)**<sup>27</sup>

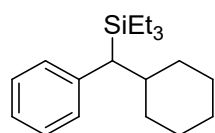

According to the general procedure C, the reaction gave **4u** in 68% yield (98 mg) as colorless oil.  $^1\text{H}$  NMR (500 MHz,  $\text{CDCl}_3$ )  $\delta$  7.21 (t,  $J = 7.5$  Hz, 2H), 7.09 (t,  $J = 7.4$  Hz, 1H), 7.03 (d,  $J = 7.6$  Hz, 2H), 1.97 (t,  $J = 10.2$  Hz, 2H), 1.89 – 1.72 (m, 2H), 1.38 – 1.22 (m, 2H), 1.19 – 1.03 (m, 3H), 1.02 – 0.92 (m, 2H), 0.89 (t,  $J = 7.9$  Hz, 9H), 0.81 – 0.70 (m, 1H), 0.57 – 0.48 (m, 6H).  $^{13}\text{C}$  NMR (126 MHz,  $\text{CDCl}_3$ )  $\delta$  144.2, 129.0, 127.9, 124.2, 41.7, 40.4, 33.9 (d,  $J = 41.9$  Hz), 26.8 (d,  $J = 20.8$  Hz), 26.5, 7.7, 4.1.

**(2,3-dihydro-1H-inden-1-yl)triethylsilane (4v)**<sup>24</sup>

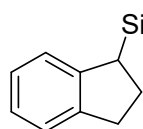

According to the general procedure C, the reaction gave **4v** in 45% yield (52 mg) as yellow oil.  $^1\text{H}$  NMR (500 MHz,  $\text{CDCl}_3$ )  $\delta$  7.21 (d,  $J = 7.1$  Hz, 1H), 7.15 – 7.06 (m, 3H), 2.97 – 2.93 (m, 2H), 2.70 (dd,  $J = 9.7, 4.1$  Hz, 1H), 2.39 – 2.29 (m, 1H), 2.15 – 2.08 (m, 1H), 0.96 (t,  $J = 8.0$  Hz, 9H), 0.64 (q,  $J = 7.9$  Hz, 6H).  $^{13}\text{C}$  NMR (126 MHz,  $\text{CDCl}_3$ )  $\delta$  146.7, 143.5, 125.8, 124.6, 124.3, 123.6, 33.0, 31.2, 27.4, 7.6, 2.8.

**Triethyl(1-(3,5,5,6,8,8-hexamethyl-5,6,7,8-tetrahydronaphthalen-2-yl)ethyl)silane (4aa)**

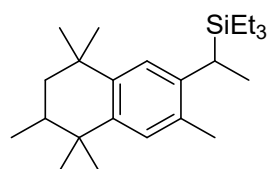

According to the general procedure C, the reaction gave **4aa** in 71% yield (127 mg) as colorless oil.  $^1\text{H}$  NMR (500 MHz,  $\text{CDCl}_3$ )  $\delta$  7.07 (d,  $J = 4.4$  Hz, 1H), 7.03 (s, 1H), 2.48 (qd,  $J = 7.5, 1.6$  Hz, 1H), 2.26 (s, 3H), 1.92 – 1.84 (m, 1H), 1.65 (td,  $J = 13.1, 4.7$  Hz, 1H), 1.40 – 1.25 (m, 13H), 1.03 (dd,  $J = 27.6, 12.3$  Hz, 6H), 0.89 (td,  $J = 7.9, 3.0$  Hz, 9H), 0.57 (tt,  $J = 13.5, 6.9$  Hz, 6H).  $^{13}\text{C}$  NMR (126 MHz,  $\text{CDCl}_3$ )  $\delta$  141.7, 141.4, 131.1, 129.7, 128.2, 124.7, 44.0, 37.1, 34.7, 32.3, 29.8, 28.9, 28.4, 26.7,

25.1, 21.2, 20.1, 16.9, 16.6, 7.5, 2.5. **HRMS** (ESI-quadrupole)  $m/z$ :  $[M+H]^+$  Calcd. For  $C_{24}H_{43}Si$  359.3129; found: 359.3127.

**(1-(4-((3,7-dimethyloct-6-en-1-yl)oxy)phenyl)ethyl)triethylsilane (4ab)**

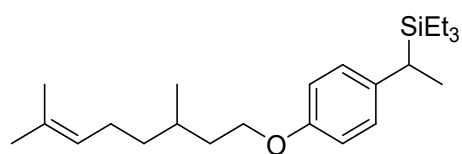

According to the general procedure C, the reaction gave **4ab** in 58% yield (108 mg) as colorless oil.  **$^1H$  NMR** (500 MHz,  $CDCl_3$ )  $\delta$  6.98 (d,  $J = 8.5$  Hz, 2H), 6.80 (d,  $J = 8.7$  Hz, 2H), 5.12 (t,  $J = 6.6$  Hz, 1H), 4.0 – 3.94 (m, 2H), 2.24 (q,  $J = 7.6$  Hz, 1H), 2.06 – 1.98 (m, 2H), 1.85 – 1.81 (m, 1H), 1.70 (s, 3H), 1.62 (s, 3H), 1.43 – 1.39 (m, 1H), 1.35 (d,  $J = 7.6$  Hz, 3H), 1.30 – 1.21 (m, 2H), 0.96 (d,  $J = 6.8$  Hz, 3H), 0.90 (t,  $J = 7.9$  Hz, 9H), 0.67 (t,  $J = 8.0$  Hz, 1H), 0.52 (q,  $J = 7.9$  Hz, 6H).  **$^{13}C$  NMR** (126 MHz,  $CDCl_3$ )  $\delta$  154.1, 136.0, 129.1, 125.7, 122.6, 112.1, 64.2, 35.1, 34.2, 27.5, 23.6, 23.6, 23.4, 17.5, 15.6, 13.6, 5.4, 0.0. **HRMS** (ESI-quadrupole)  $m/z$ :  $[M+H]^+$  Calcd. For  $C_{24}H_{43}OSi$  375.3078; found: 375.3079.

**(1R,2S,5R)-2-isopropyl-5-methylcyclohexyl 4-(1-(triethylsilyl)ethyl)benzoate (4ac)**

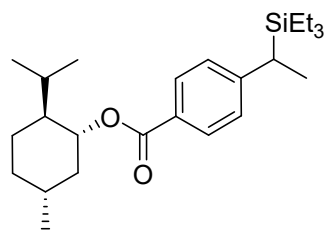

According to the general procedure C, the reaction gave **4ac** in 84% yield (168 mg) as yellow oil.  **$^1H$  NMR** (500 MHz,  $CDCl_3$ )  $\delta$  7.91 (d,  $J = 8.0$  Hz, 2H), 7.12 (d,  $J = 8.1$  Hz, 2H), 4.91 (m, 1H), 2.40 (q,  $J = 7.5$  Hz, 1H), 2.13 (d,  $J = 12.3$  Hz, 1H), 1.99 (m, 1H), 1.73 (d,  $J = 11.2$  Hz, 2H), 1.60 – 1.48 (m, 2H), 1.39 (d,  $J = 7.5$  Hz, 3H), 1.18 – 1.04 (m, 2H), 0.95 – 0.83 (m, 16H), 0.80 (d,  $J = 6.9$  Hz, 3H), 0.52 (q,  $J = 7.9$  Hz, 6H).  **$^{13}C$  NMR** (126 MHz,  $CDCl_3$ )  $\delta$  166.3, 152.2, 129.4, 126.9, 126.8, 74.4, 47.3, 41.0, 34.4, 31.4, 27.6, 26.4, 23.6, 22.0, 20.8, 16.5, 15.1, 7.4, 2.0. **HRMS** (ESI-quadrupole)  $m/z$ :  $[M+H]^+$  Calcd. For  $C_{25}H_{43}O_2Si$  403.3027; found: 403.3023.

**(1S,2R,4S)-1,7,7-trimethylbicyclo[2.2.1]heptan-2-yl**

**4-(1-**

**(triethylsilyl)ethyl)benzoate (4ad)**

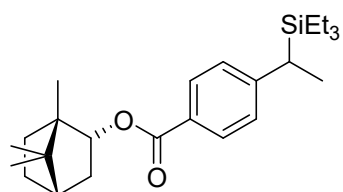

According to the general procedure C, the reaction gave **4ad** in 80% yield (160 mg) as white solid. m.p. 38.5 –

38.9 °C.  $^1\text{H NMR}$  (400 MHz,  $\text{CDCl}_3$ )  $\delta$  7.95 (d,  $J = 8.3$  Hz, 2H), 7.16 (d,  $J = 8.3$  Hz, 2H), 5.13 – 5.09 (m, 1H), 2.52 – 2.40 (m, 2H), 2.21 – 2.14 (m, 1H), 1.84 – 1.79 (m, 1H), 1.75 (t,  $J = 4.5$  Hz, 1H), 1.62 (s, 2H), 1.42 (d,  $J = 7.5$  Hz, 3H), 1.13 (dd,  $J = 13.8, 3.4$  Hz, 1H), 0.99 (s, 3H), 0.94 – 0.90 (m, 15H), 0.57 – 0.51 (m, 6H).  $^{13}\text{C NMR}$  (126 MHz,  $\text{CDCl}_3$ )  $\delta$  167.0, 152.3, 129.3, 126.9, 126.8, 80.1, 49.0, 47.8, 45.0, 36.9, 28.1, 27.6, 27.4, 19.7, 18.9, 15.1, 13.6, 7.5, 2.0. **HRMS** (ESI-quadrupole)  $m/z$ :  $[\text{M}+\text{H}]^+$  Calcd. For  $\text{C}_{25}\text{H}_{41}\text{O}_2\text{Si}$  401.2870; found: 401.2879.

**(3aS,5S,6R,6aS)-5-((R)-2,2-dimethyl-1,3-dioxolan-4-yl)-2,2-dimethyltetrahydrofuro[2,3-d][1,3]dioxol-6-yl 4-(1-(triethylsilyl)ethyl)benzoate (4ae)**

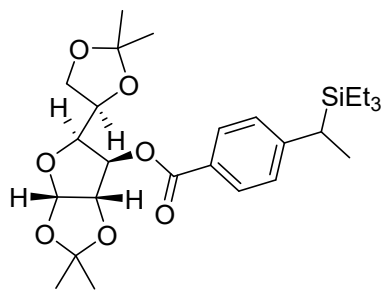

According to the general procedure C, the reaction gave **4ae** in 43% yield (109 mg) as yellow oil.  $^1\text{H NMR}$  (400 MHz,  $\text{CDCl}_3$ )  $\delta$  7.91 (d,  $J = 8.3$  Hz, 2H), 7.16 (d,  $J = 8.3$  Hz, 2H), 5.97 (d,  $J = 3.6$  Hz, 1H), 5.50 (d,  $J = 2.6$  Hz, 1H), 4.65 (d,  $J = 3.7$  Hz, 1H), 4.43 – 4.35 (m, 2H), 4.14 (dd,  $J = 11.3, 6.1$  Hz, 2H), 2.44 (q,  $J = 7.4$  Hz, 1H), 1.59 (d,  $J = 10.0$  Hz, 6H), 1.44 – 1.41 (m, 5H), 1.34 (s, 3H), 1.30 (s, 3H), 0.91 (t,  $J = 7.9$  Hz, 8H), 0.53 (q,  $J = 8.0$  Hz, 5H).  $^{13}\text{C NMR}$  (126 MHz,  $\text{CDCl}_3$ )  $\delta$  165.1, 152.9, 129.7, 129.5, 127.1, 125.3, 12.3, 109.3, 105.1, 83.4, 79.9, 72.6, 70.1, 67.2, 26.8, 26.7, 26.2, 25.2, 7.4, 6.7, 4.7, 1.9. **HRMS** (ESI-quadrupole)  $m/z$ :  $[\text{M}+\text{H}]^+$  Calcd. For  $\text{C}_{27}\text{H}_{43}\text{O}_7\text{Si}$  507.2773; found: 507.2782.

**(3S,8S,9S,10R,13R,14S,17R)-10,13-dimethyl-17-((R)-6-methylheptan-2-yl)-2,3,4,7,8,9,10,11,12,13,14,15,16,17-tetradecahydro-1H-cyclopenta[a]phenanthren-3-yl 4-(1-(triethylsilyl)ethyl)benzoate (4af)**

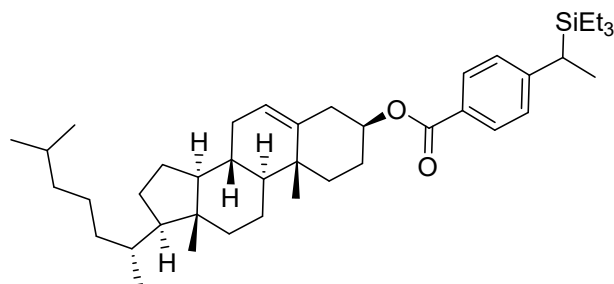

According to the general procedure C, the reaction gave **4af** in 53% yield (167 mg) as yellow oil.  $^1\text{H NMR}$  (500 MHz,  $\text{CDCl}_3$ )  $\delta$  7.92 (d,

$J = 7.9$  Hz, 2H), 7.32 (d,  $J = 8.1$  Hz, 2H), 5.34 (d,  $J = 5.0$  Hz, 1H), 4.83 (q,  $J = 6.4$  Hz, 1H), 2.38 (d,  $J = 8.2$  Hz, 2H), 2.25 – 2.13 (m, 1H), 1.93 (td,  $J = 13.5, 12.8, 7.1$  Hz, 3H), 1.84 (d,  $J = 13.7$  Hz, 1H), 1.79 – 1.74 (m, 1H), 1.51 (s, 3H), 1.42 (td,  $J = 15.9, 14.9, 6.0$  Hz, 6H), 1.34 (d,  $J = 6.4$  Hz, 3H), 1.27 (d,  $J = 8.9$  Hz, 4H), 1.19 (d,  $J = 9.3$  Hz, 3H), 1.10 – 1.03 (m, 4H), 0.99 (s, 3H), 0.93 (d,  $J = 6.3$  Hz, 3H), 0.84 (d,  $J = 8.2$  Hz, 9H), 0.79 (d,  $J = 6.7$  Hz, 6H), 0.62 (s, 3H), 0.49 (p,  $J = 7.4$  Hz, 6H).  $^{13}\text{C}$  NMR (126 MHz,  $\text{CDCl}_3$ )  $\delta$  166.0, 152.0, 139.7, 129.5, 129.3, 125.0, 122.7, 74.4, 70.2, 56.7, 56.1, 50.0, 42.3, 39.7, 39.5, 38.2, 37.0, 36.6, 36.2, 31.9, 31.9, 28.2, 28.2, 28.0, 27.9, 27.1, 24.3, 23.8, 22.8, 22.6, 21.0, 19.4, 18.7, 11.8, 6.8, 4.8. HRMS (ESI-quadrupole)  $m/z$ :  $[\text{M}+\text{H}]^+$  Calcd. For  $\text{C}_{42}\text{H}_{69}\text{O}_2\text{Si}$  633.5061; found: 633.5054.

**(4S,5'R,6aR,6bS,8aS,8bR,9S,10R,11aS,12aS,12bS)-5',6a,8a,9-tetramethyl-1,3,3',4,4',5,5',6,6a,6b,6',7,8,8a,8b,9,11a,12,12a,12b-icosahydrospiro[naphtho[2',1':4,5]indeno[2,1-b]furan-10,2'-pyran]-4-yl 4-(1-(triethylsilyl)ethyl)benzoate (4ag)**

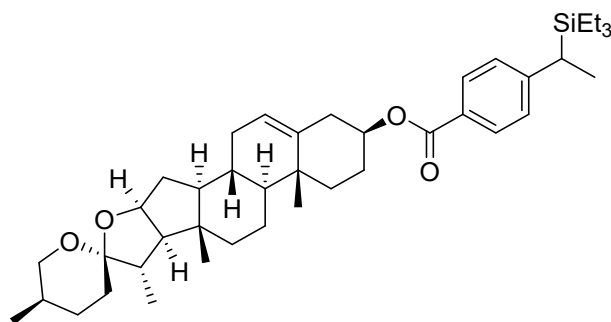

According to the general procedure C, the reaction gave **4ag** in 38% yield (125 mg) as white solid. m.p. 101.2 – 101.7 °C.  $^1\text{H}$  NMR (500 MHz,  $\text{CDCl}_3$ )  $\delta$  7.91 (d,  $J = 8.3$  Hz, 2H), 7.32 (d,  $J = 8.3$  Hz, 2H), 5.37 –

5.31 (m, 1H), 4.82 (q,  $J = 6.4$  Hz, 1H), 4.34 (q,  $J = 7.5$  Hz, 1H), 3.40 (m,  $J = 11.0, 4.5, 2.1$  Hz, 1H), 3.30 (t,  $J = 10.9$  Hz, 1H), 2.38 (d,  $J = 6.8$  Hz, 2H), 1.92 (m,  $J = 12.3, 6.9, 5.6, 2.4$  Hz, 4H), 1.85 – 1.77 (m, 2H), 1.74 – 1.65 (m, 3H), 1.62 – 1.51 (m, 6H), 1.43 – 1.38 (m, 2H), 1.34 (d,  $J = 6.4$  Hz, 3H), 1.22 – 1.11 (m, 4H), 1.11 – 1.02 (m, 2H), 1.01 (s, 3H), 0.90 (d,  $J = 6.9$  Hz, 3H), 0.83 (t,  $J = 7.9$  Hz, 9H), 0.73 – 0.70 (m, 6H), 0.49 (m, 6H).  $^{13}\text{C}$  NMR (126 MHz,  $\text{CDCl}_3$ )  $\delta$  166.0, 152.0, 139.8, 129.5, 129.3, 125.1, 122.5, 109.3, 80.8, 74.3, 70.3, 66.9, 62.1, 56.5, 50.0, 41.6, 40.3, 39.8, 38.2, 37.0, 36.8, 32.1, 31.9, 31.5, 31.4, 30.3, 28.8, 27.9, 27.2, 20.9, 19.4, 17.2, 16.3, 14.6, 6.8, 4.8. HRMS (ESI-quadrupole)  $m/z$ :  $[\text{M}+\text{H}]^+$  Calcd. For  $\text{C}_{42}\text{H}_{65}\text{O}_4\text{Si}$  661.4647; found:



661.4645.

**(E)-triethyl(2-methylstyryl)silane (5a)**<sup>28</sup>

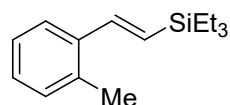

According to the general procedure D, the reaction gave **5a** in 69% yield (37 mg) as colorless oil. <sup>1</sup>H NMR (400 MHz, CDCl<sub>3</sub>) δ 7.60 – 7.52 (m, 1H), 7.23 – 7.16 (m, 4H), 6.36 (d, *J* = 19.2 Hz, 1H), 2.42 (s, 3H), 1.05 (t, *J* = 7.9 Hz, 9H), 0.68 (q, *J* = 7.9 Hz, 6H). <sup>13</sup>C NMR (101 MHz, CDCl<sub>3</sub>) δ 142.8, 138.0, 135.1, 130.2, 127.8, 127.6, 126.1, 125.3, 19.6, 7.4, 3.6.

**(E)-triethyl(2-(trifluoromethyl)styryl)silane (5b)**<sup>28</sup>

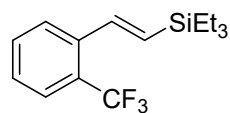

According to the general procedure D, the reaction gave **5b** in 26% yield (37 mg) as colorless oil. <sup>1</sup>H NMR (400 MHz, CDCl<sub>3</sub>) δ 7.72 (d, *J* = 7.8 Hz, 1H), 7.64 (d, *J* = 7.8 Hz, 1H), 7.53 (t, *J* = 7.6 Hz, 1H), 7.38 – 7.28 (m, 2H), 6.46 (d, *J* = 19.1 Hz, 1H), 1.02 (t, *J* = 7.9 Hz, 9H), 0.71 (q, *J* = 7.9 Hz, 6H). <sup>13</sup>C NMR (126 MHz, CDCl<sub>3</sub>) δ 148.9, 140.7, 138.1, 131.8, 131.8, 127.3, 127.2, 125.5, 125.5, 7.3, 3.4.

**(E)-triethyl(2-methoxystyryl)silane (5c)**<sup>28</sup>

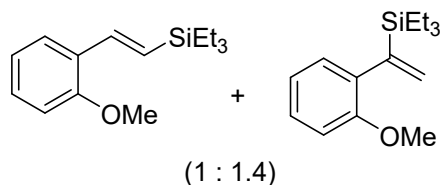

According to the general procedure D, the reaction gave **5c** in 50% yield (62 mg) as colorless oil. <sup>1</sup>H NMR (500 MHz, CDCl<sub>3</sub>) δ 7.55 (dd, *J* = 7.6, 1.7 Hz, 1H), 7.30 (d, *J* = 19.5 Hz, 1H), 7.25 – 7.15 (m, 2H), 6.97 (dd, *J* = 7.4, 1.8 Hz, 1H), 6.95 – 6.84 (m, 3H), 6.81 – 6.78 (m, 1H), 6.38 (d, *J* = 19.5 Hz, 1H), 5.79 (d, *J* = 3.3 Hz, 1H), 5.60 (d, *J* = 3.3 Hz, 1H), 3.84 (s, 3H), 3.76 (s, 4H), 0.99 (t, *J* = 7.9 Hz, 9H), 0.90 (t, *J* = 7.9 Hz, 13H), 0.66 (q, *J* = 7.9 Hz, 6H), 0.60 (q, *J* = 7.9 Hz, 9H). <sup>13</sup>C NMR (126 MHz, CDCl<sub>3</sub>) δ 156.6, 155.8, 149.1, 139.1, 135.3, 128.9, 128.8, 128.5, 127.4, 126.2, 126.1, 120.6, 120.6, 111.0, 109.8, 55.6, 54.8, 7.5, 7.4, 3.6, 3.5.

**1-methoxy-4-(vinyl-d3)benzene (8)**<sup>11</sup>

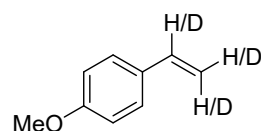

**$^1\text{H}$  NMR** (500 MHz,  $\text{CDCl}_3$ )  $\delta$  7.26 (d,  $J = 8.6$  Hz, 2H), 6.77 (d,  $J = 8.7$  Hz, 2H), 6.62–6.52 (m, 0.52H), 5.57–5.45 (m, 0.59 H), 5.08–4.97 (m, 0.56H), 3.72 (s, 3H).  **$^{13}\text{C}$  NMR** (126 MHz,  $\text{CDCl}_3$ )  $\delta$  159.4, 136.2, 135.0, 129.7, 127.4, 113.9, 55.3.

## VII. Unsuccessful substrate

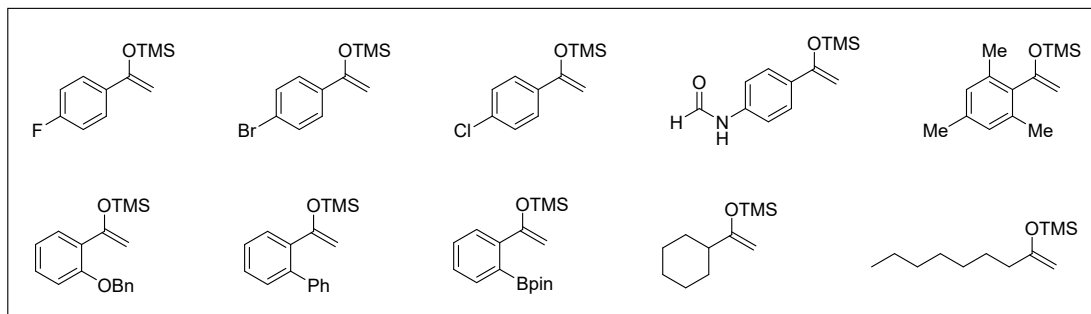

## VIII. NMR Spectra of Compounds

### 1-methoxy-4-vinylbenzene (3c)

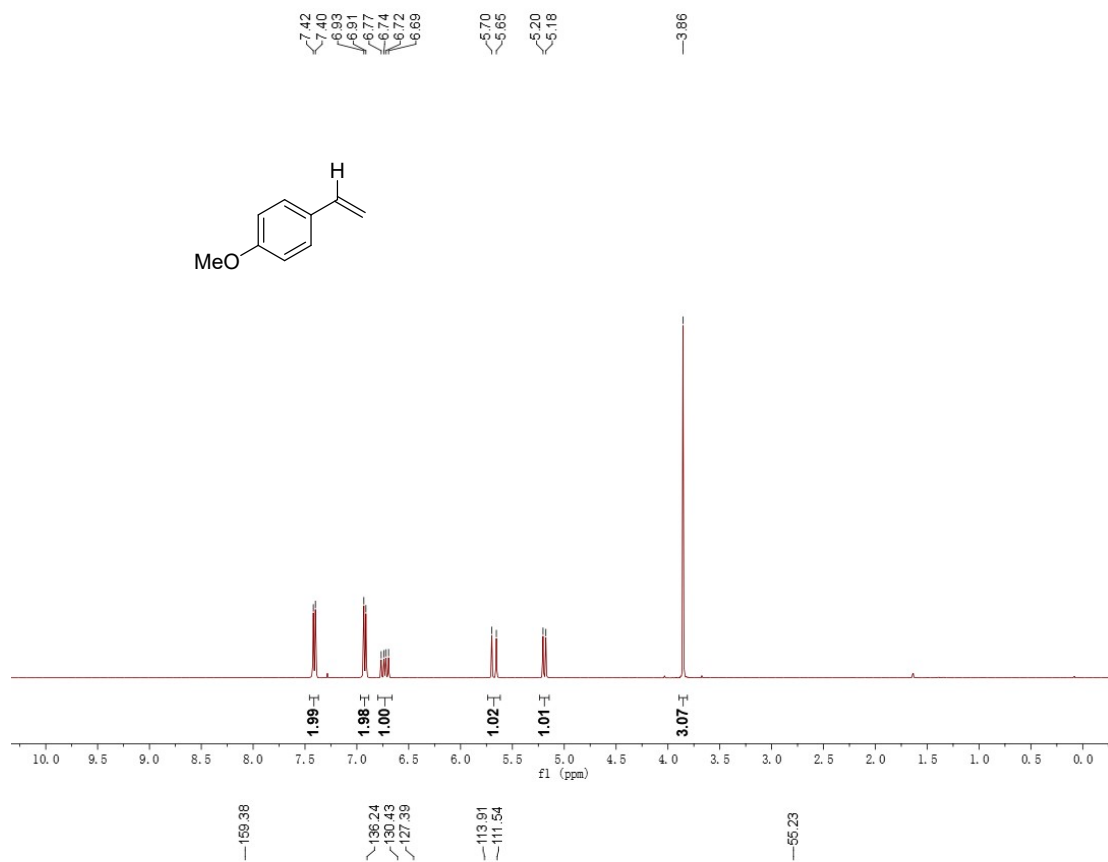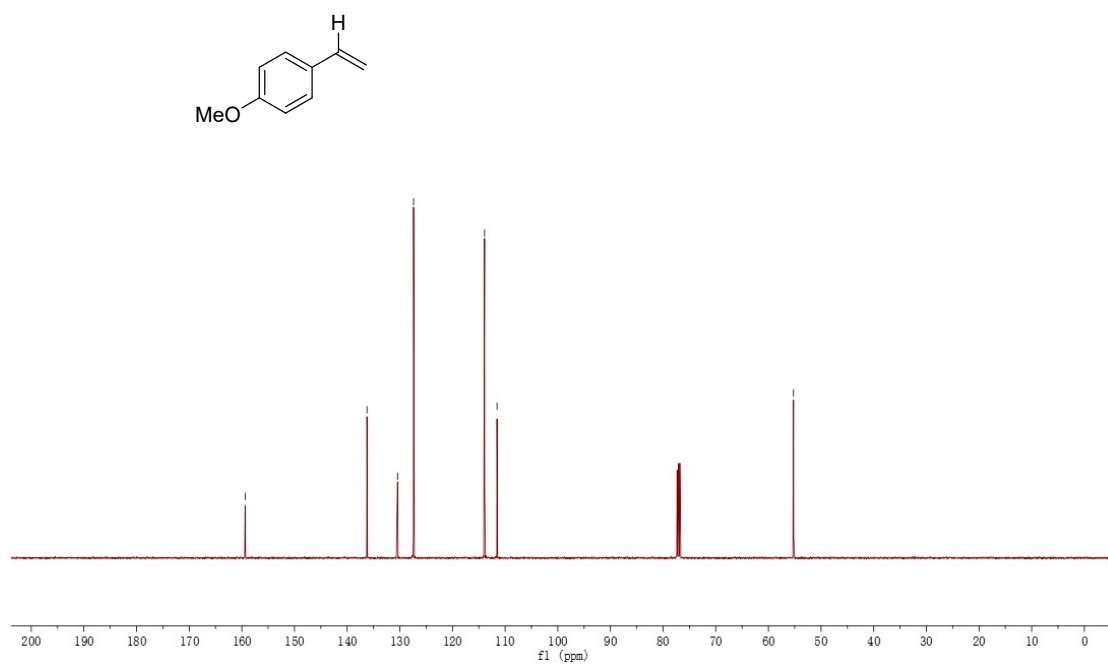

# 1-(benzyloxy)-4-vinylbenzene (3d)

7.43  
7.41  
7.39  
7.37  
7.36  
7.34  
7.33  
7.31  
6.93  
6.92  
6.66  
6.65  
6.62  
5.62  
5.56  
5.13  
5.06

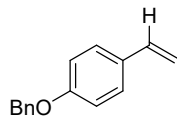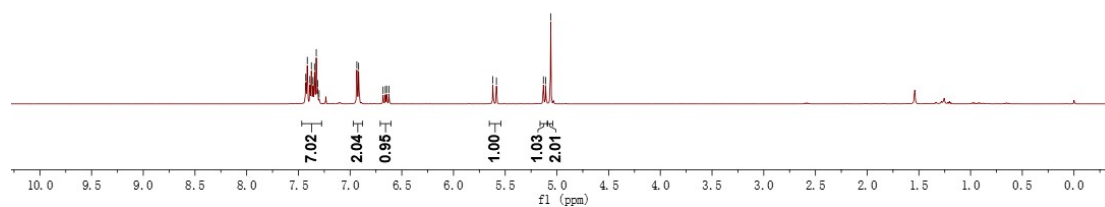

158.56  
136.93  
136.18  
130.70  
128.57  
127.95  
127.43  
127.38  
114.87  
111.69  
70.02

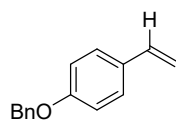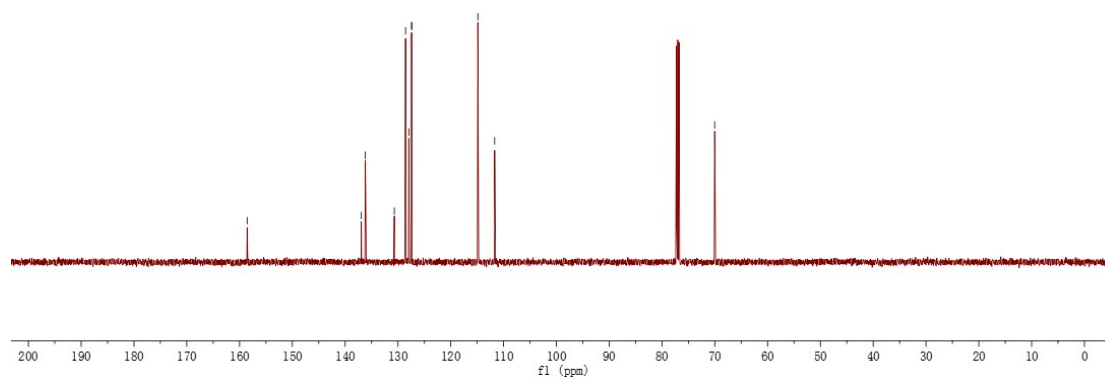

# 4-vinyl-1,1'-biphenyl (3e)

7.65  
7.65  
7.62  
7.60  
7.59  
7.49  
7.47  
7.45  
7.40  
7.38  
7.36  
6.83  
6.81  
6.79  
5.86  
5.81  
5.33  
5.30

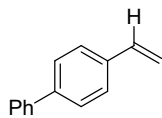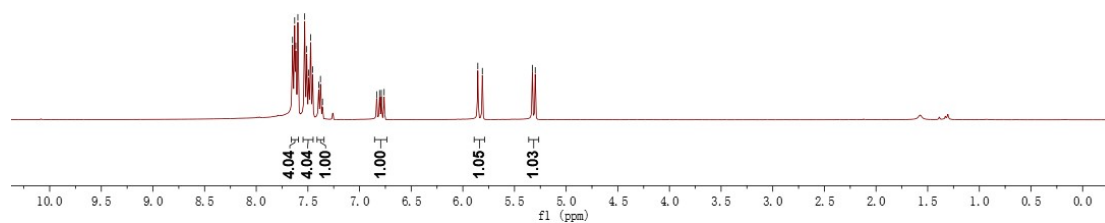

140.71  
140.56  
136.58  
136.39  
128.77  
127.30  
127.21  
126.95  
126.63  
113.88

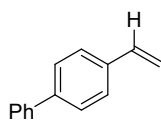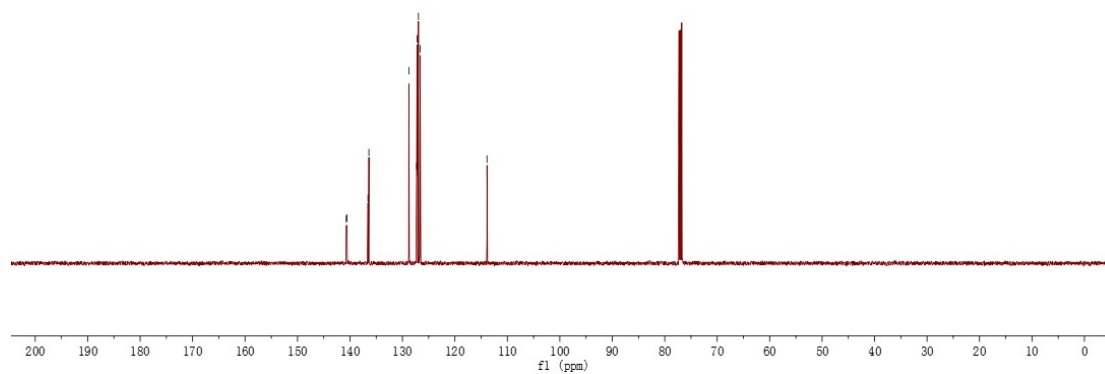

# Methyl 4-vinylbenzoate (3f)

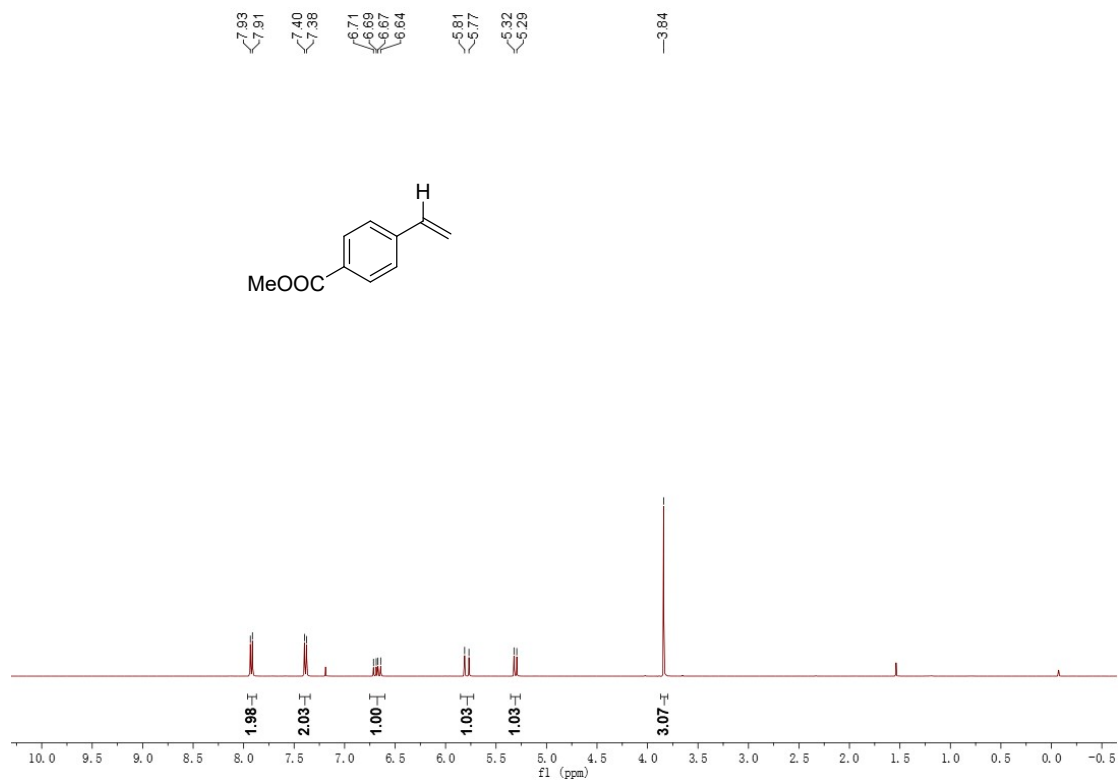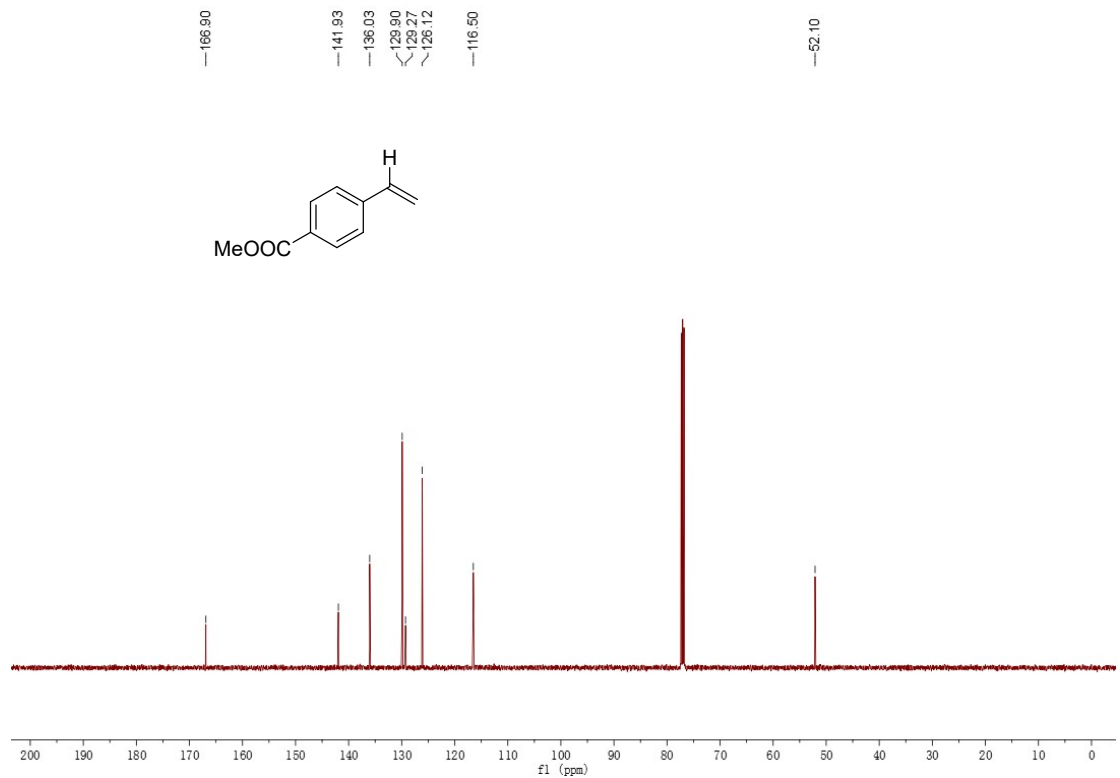

# 5-vinylbenzo[d][1,3]dioxole (3g)

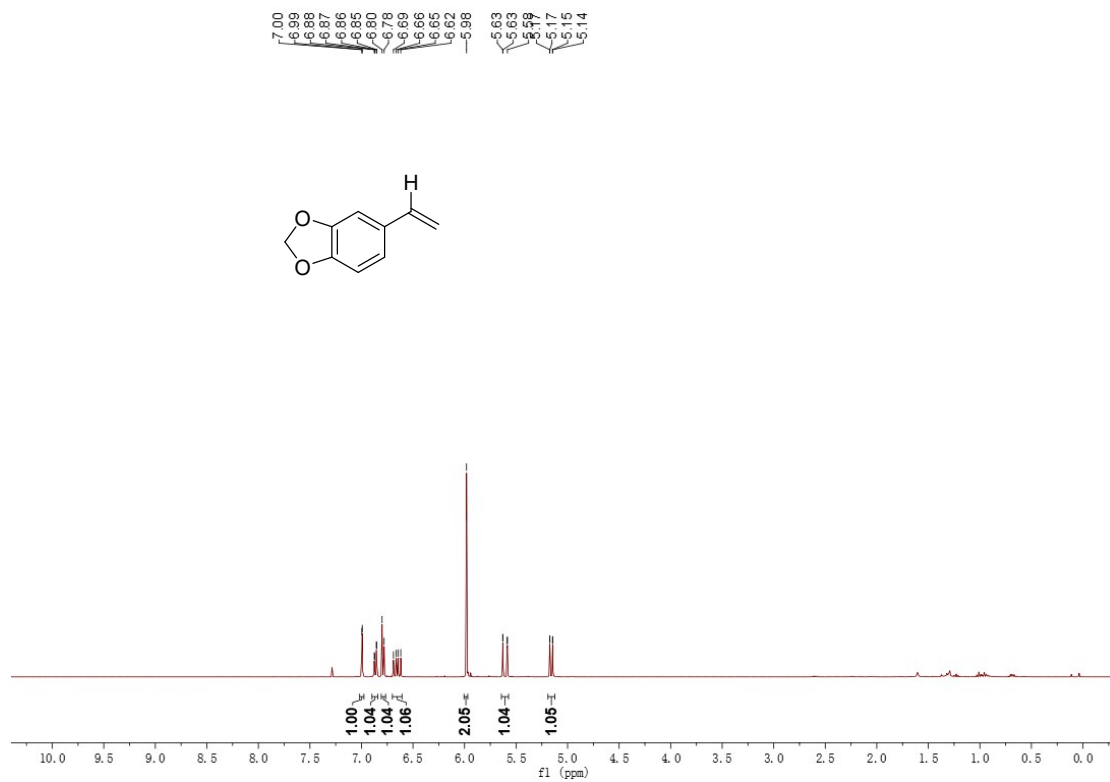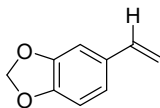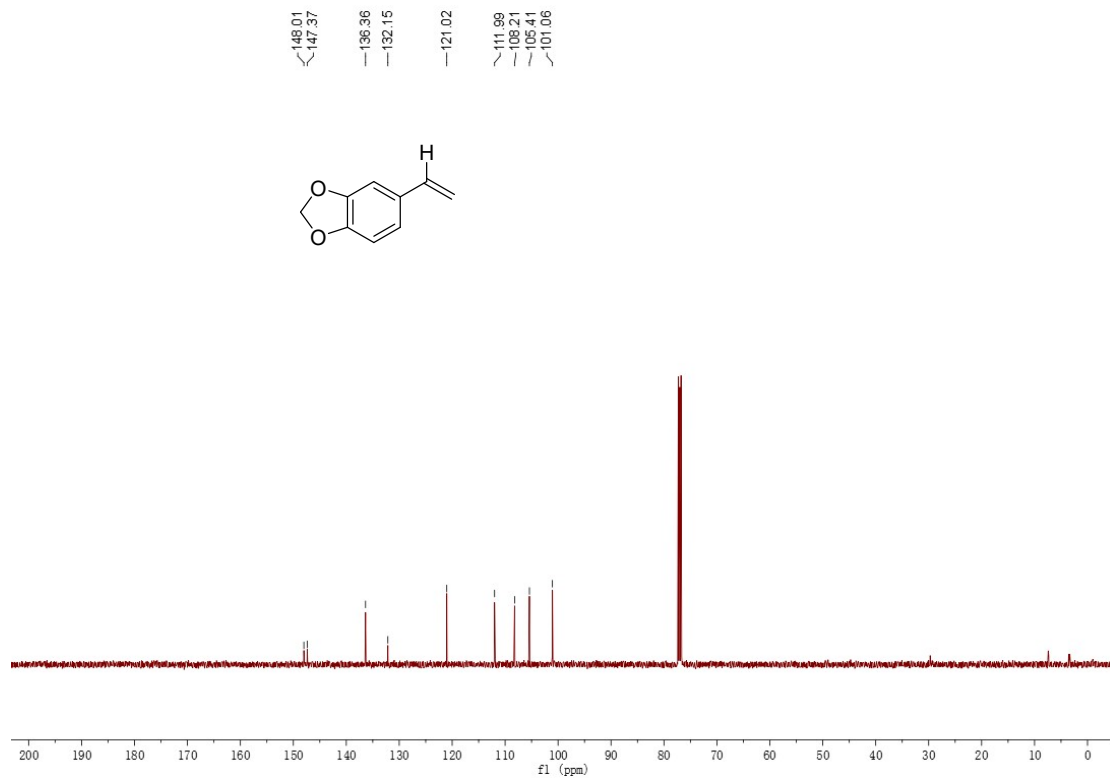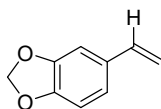



# 4,4,5,5-tetramethyl-2-(4-vinylphenyl)-1,3,2-dioxaborolane (3h)

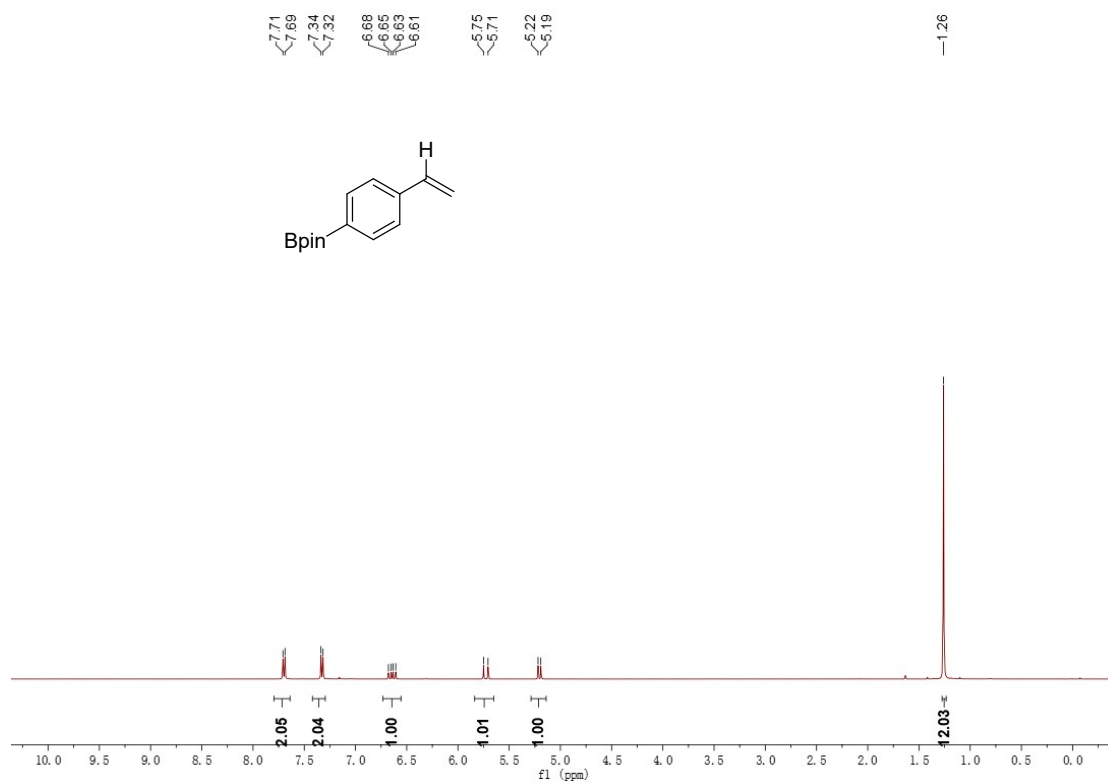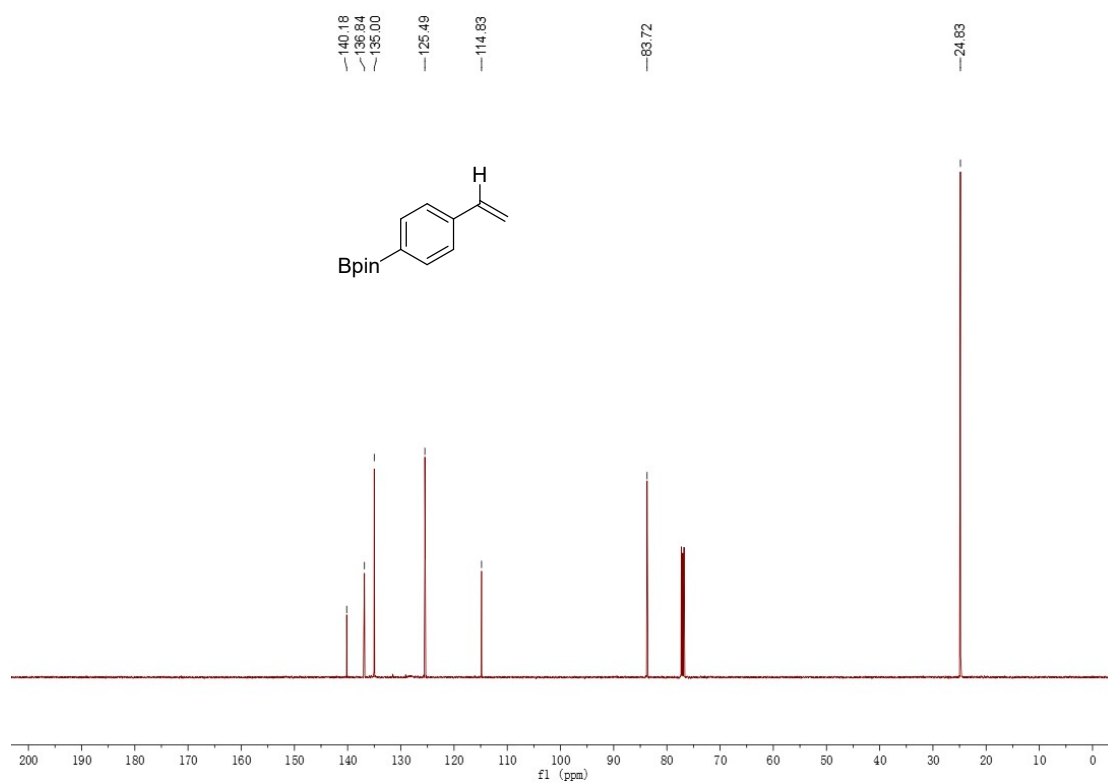

# Tert-butyldimethyl(4-vinylphenoxy)silane (3i)

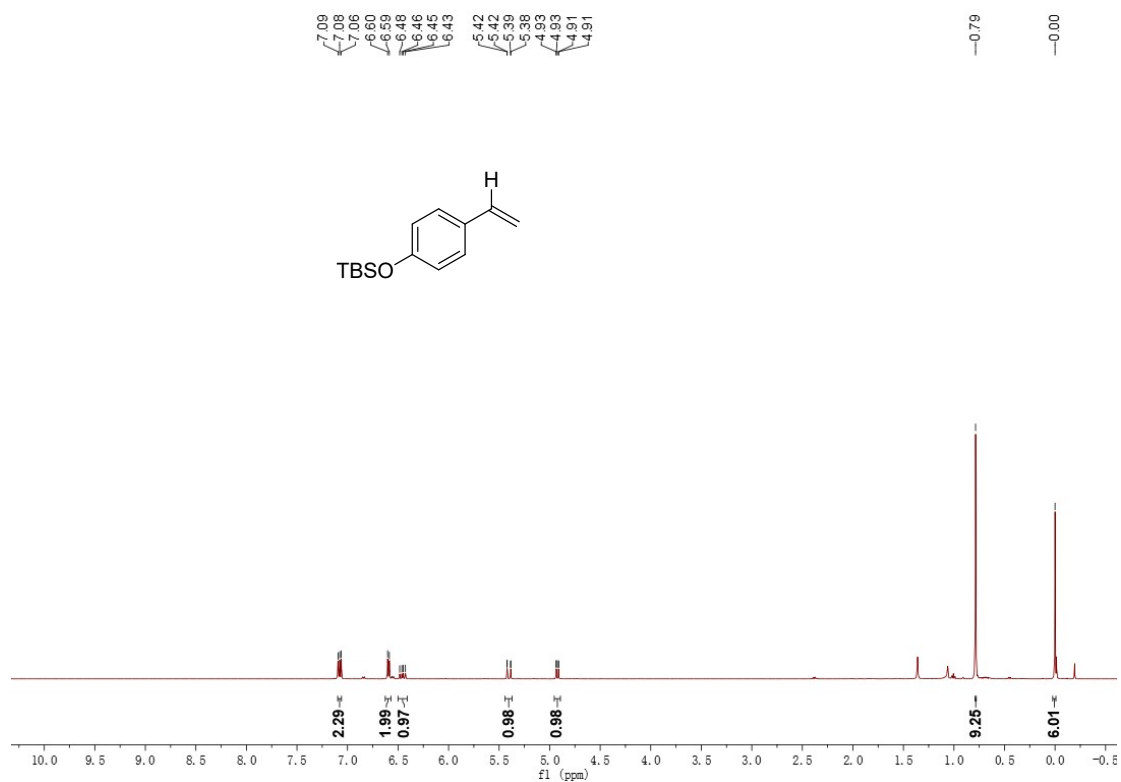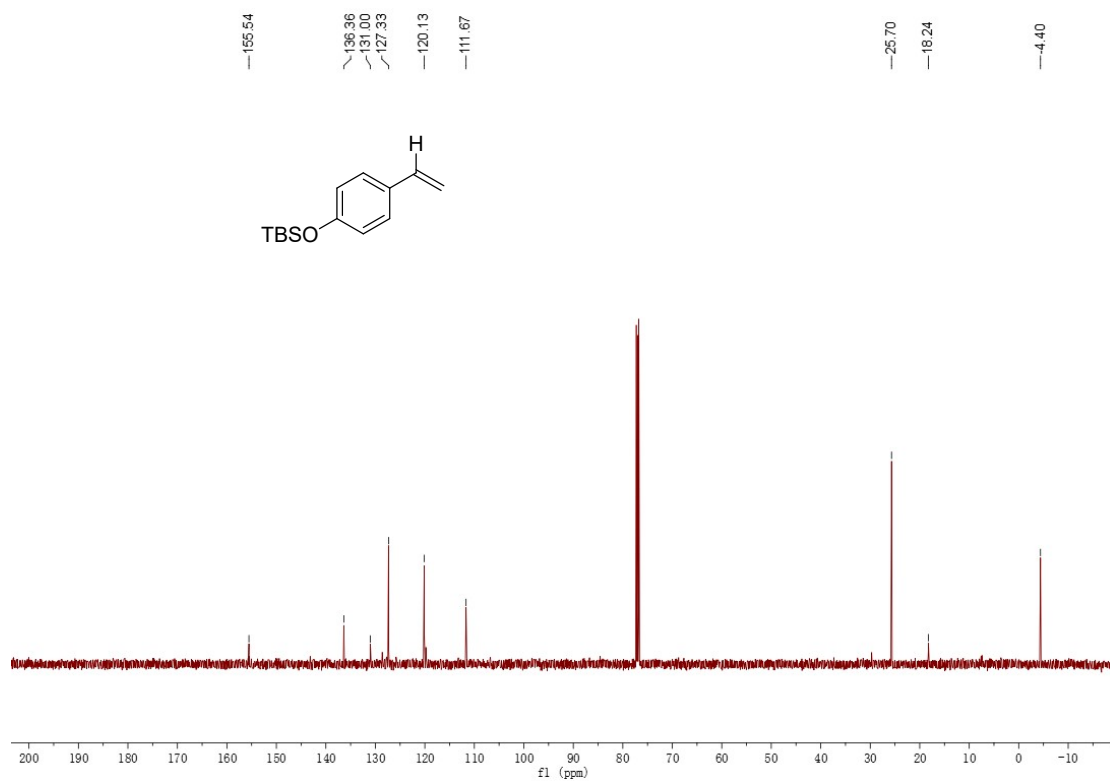

## 2-vinylnaphthalene (3j)

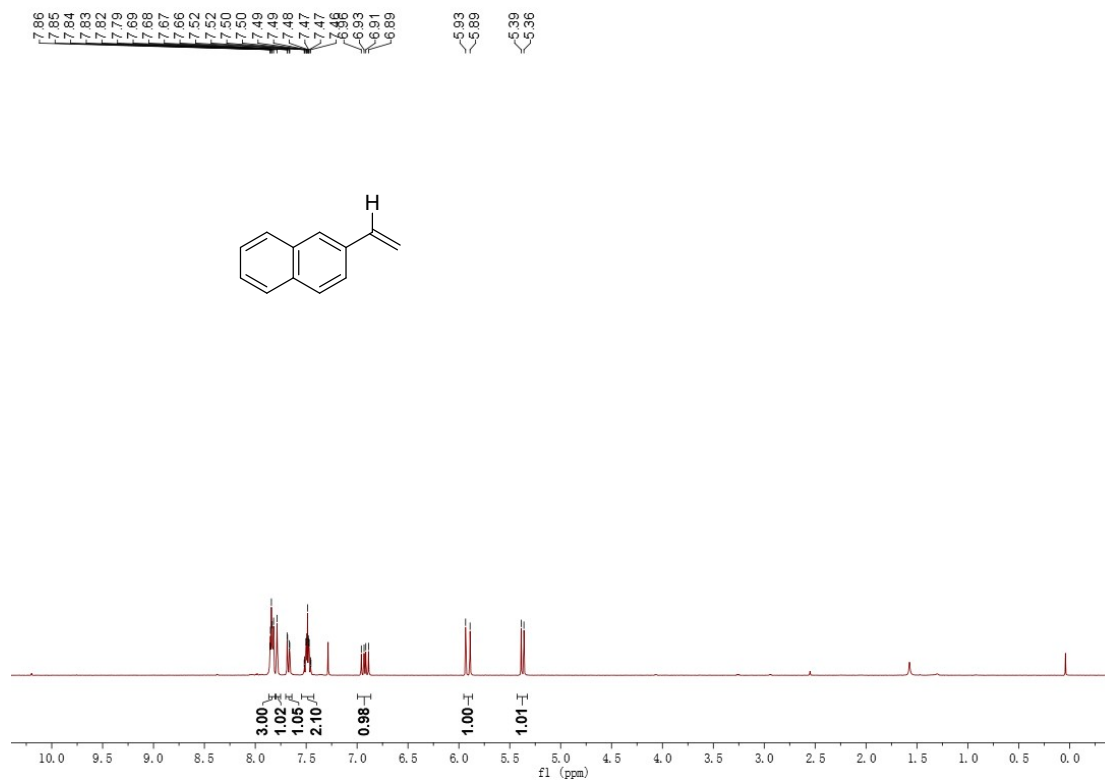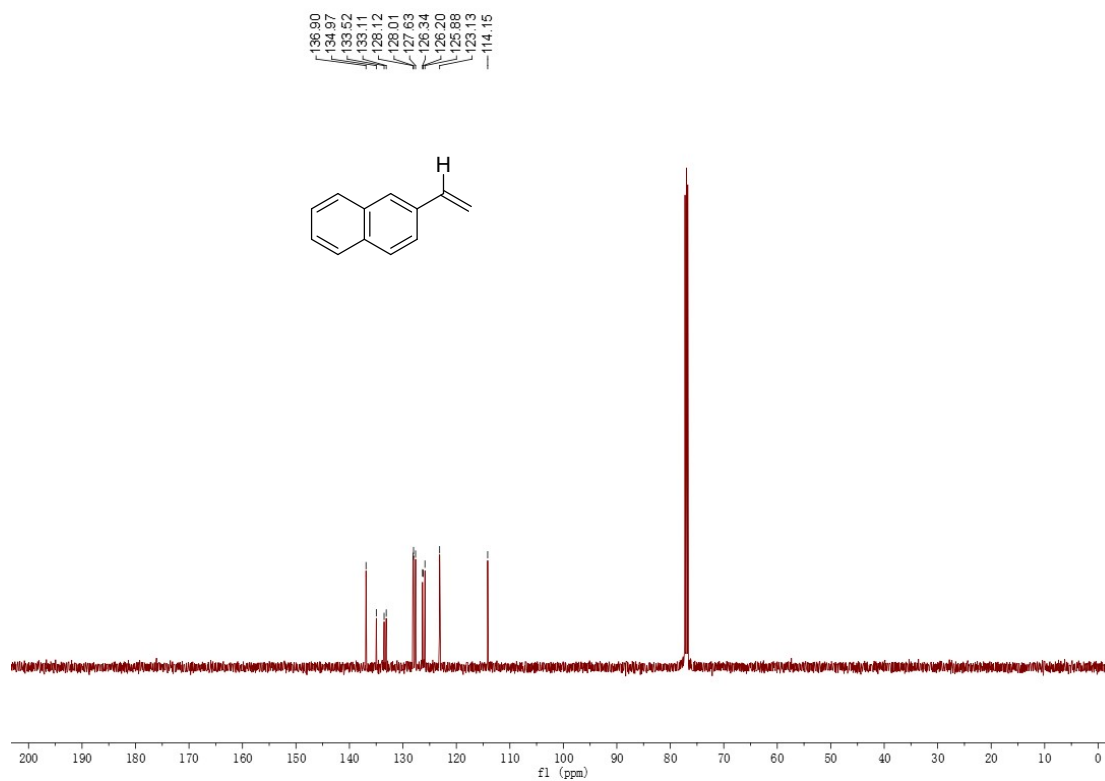

## 2-methoxy-6-vinylnaphthalene (3k)

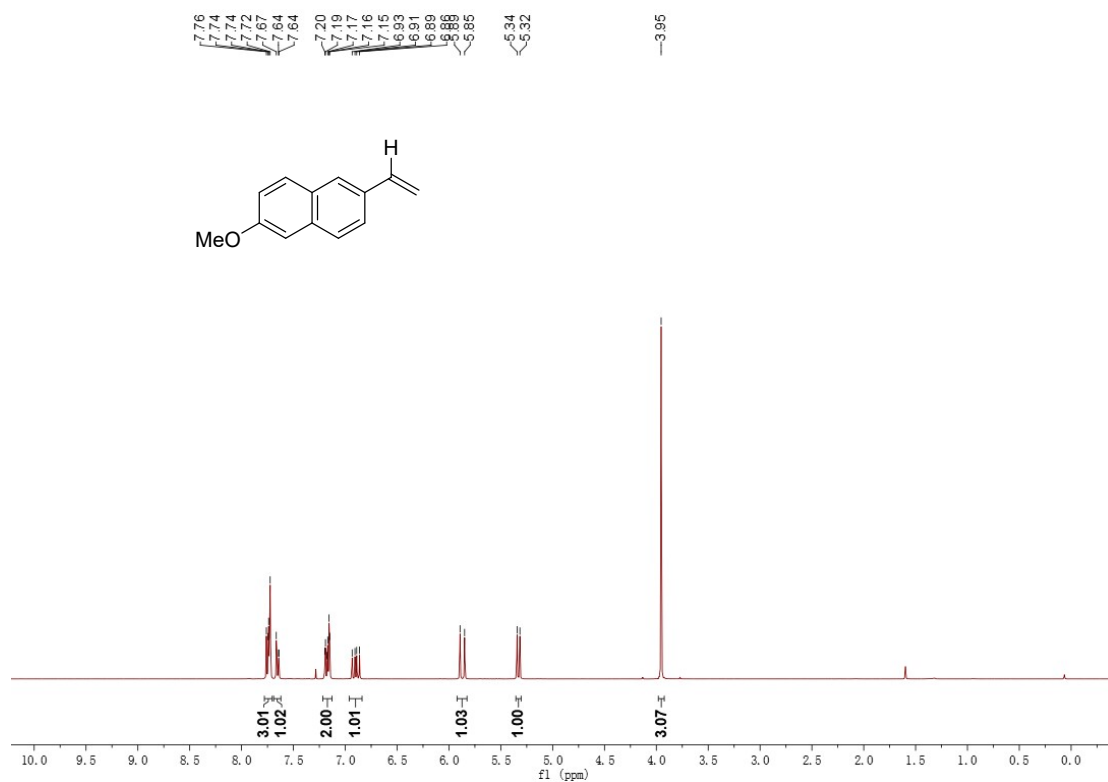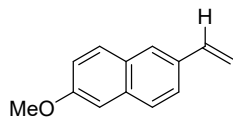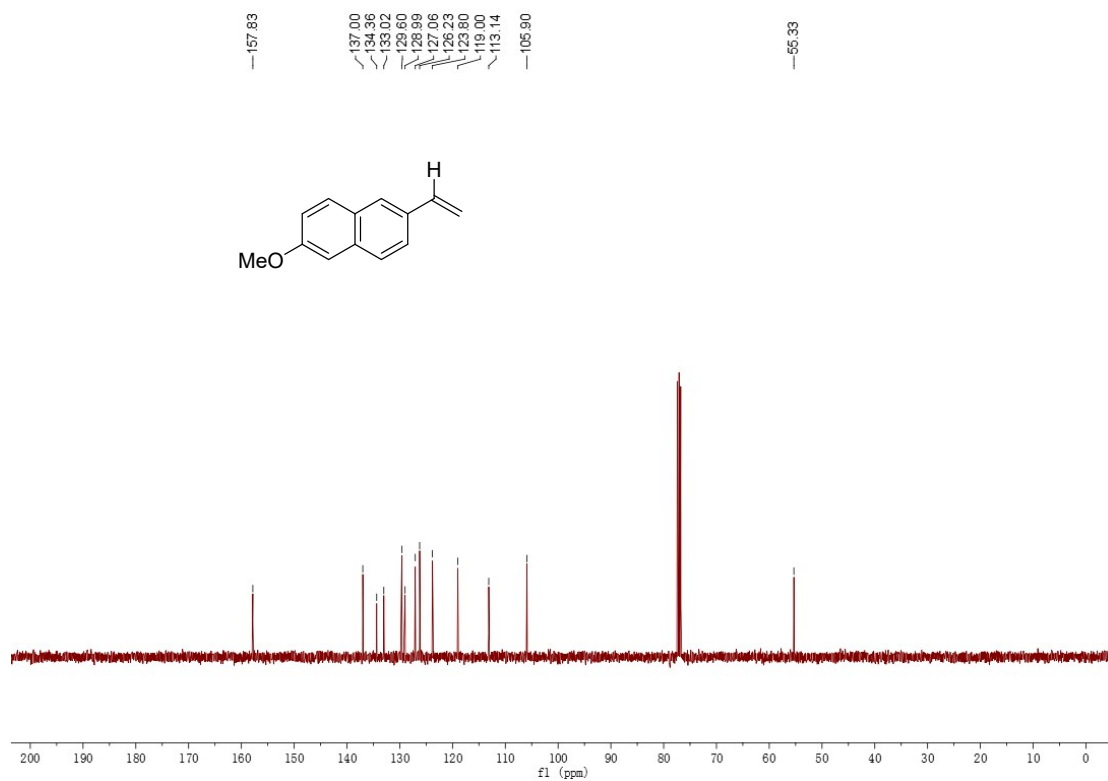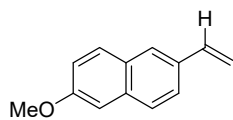

# 2-vinyl-9H-fluorene (3l)

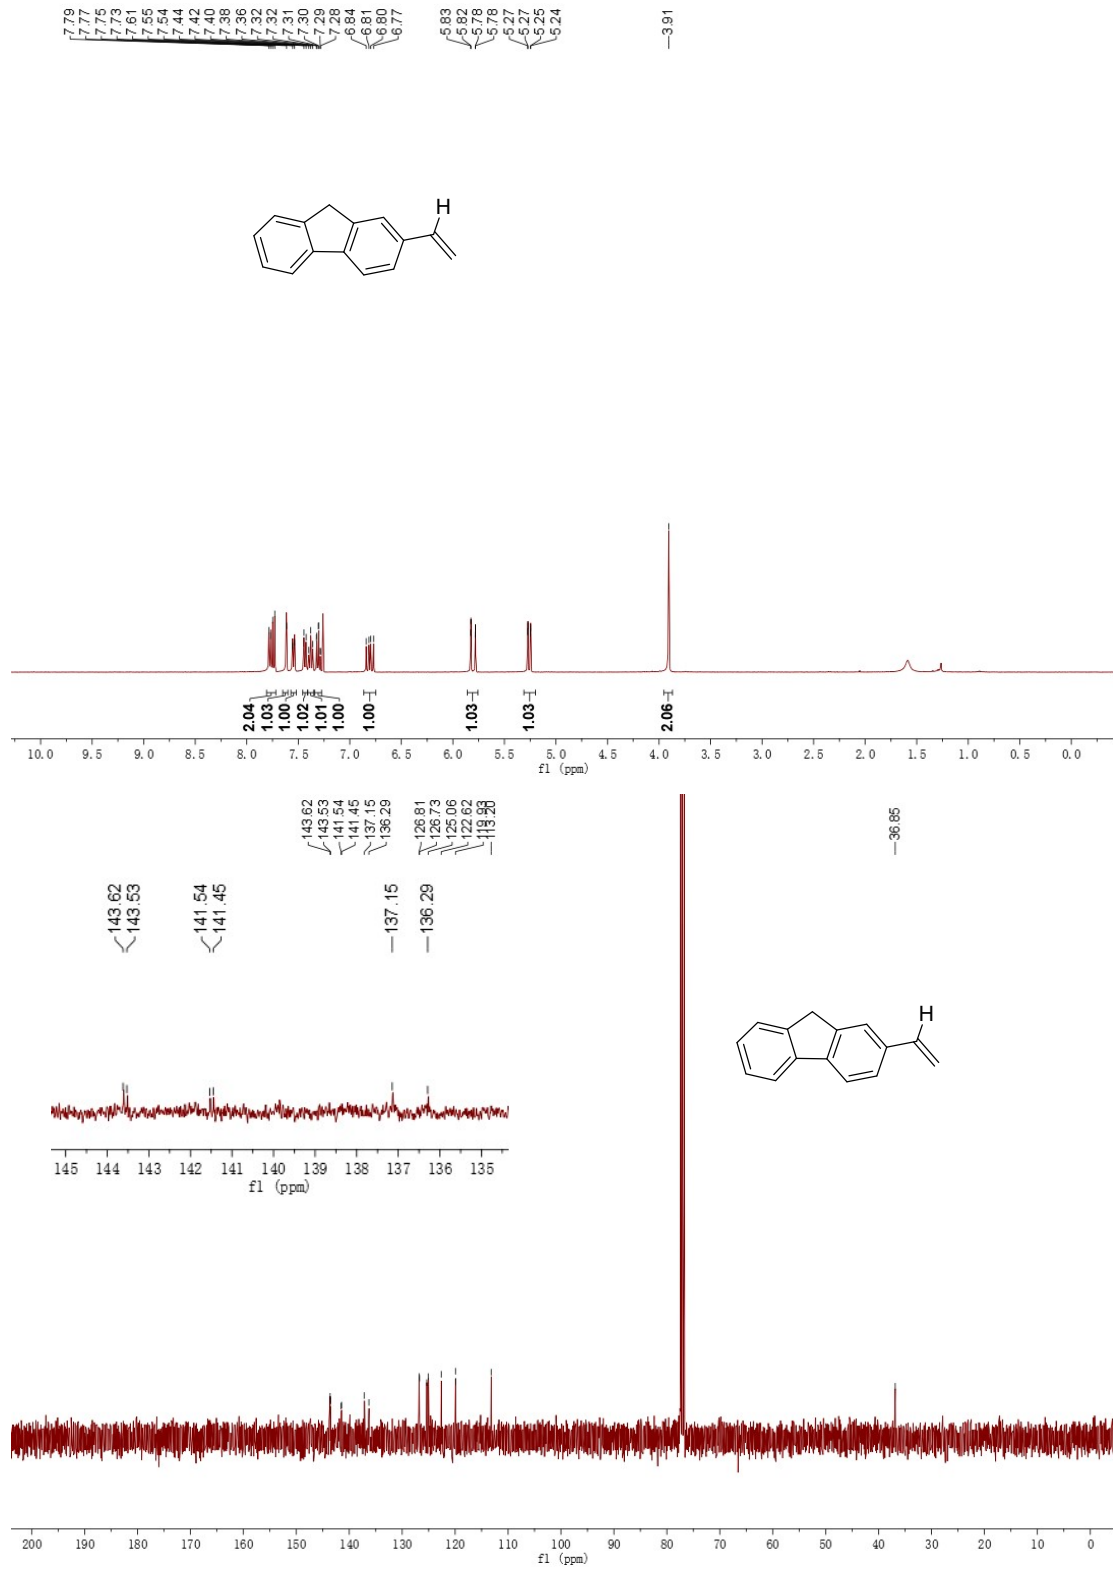

# Vinylferrocene (3m)

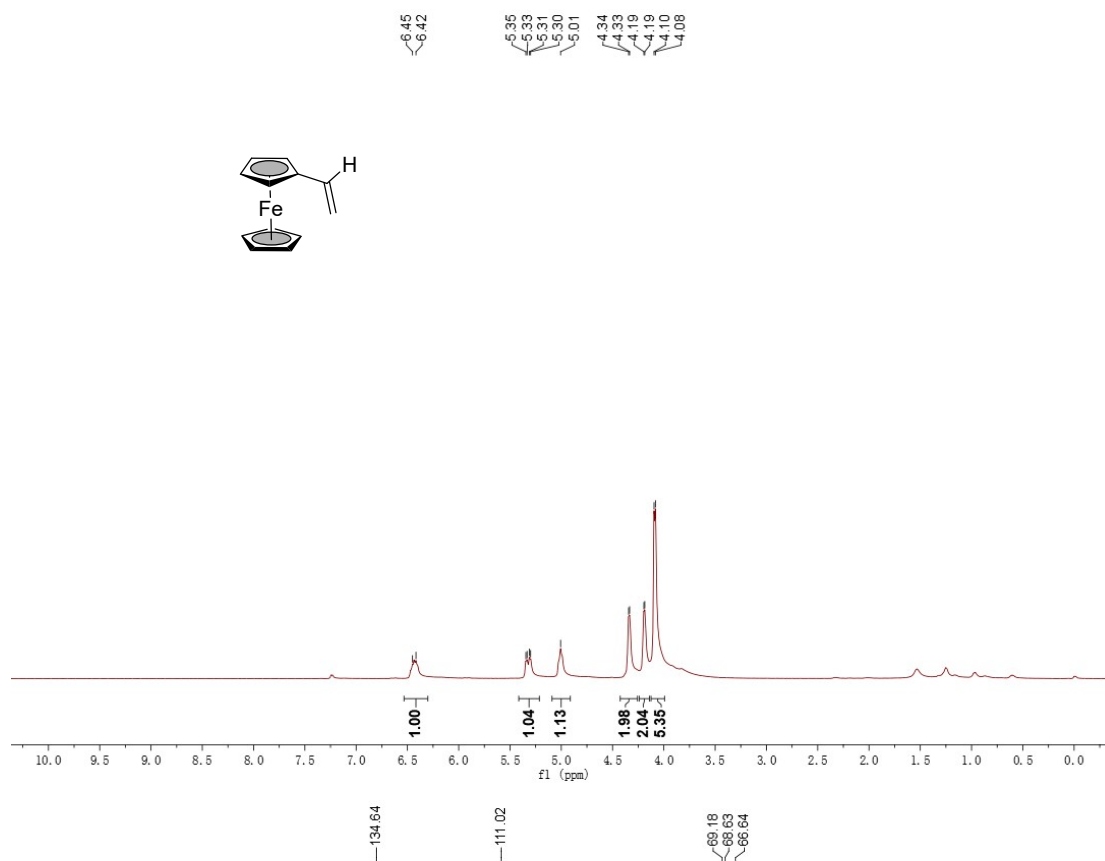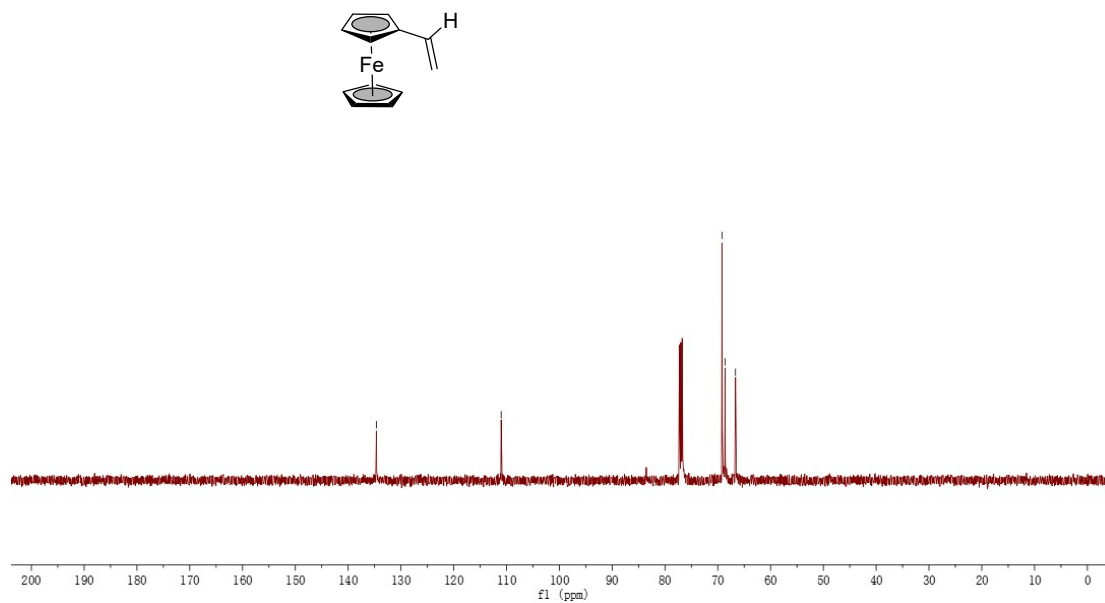

# 1-(4-vinylphenyl)-1H-pyrrole (3n)

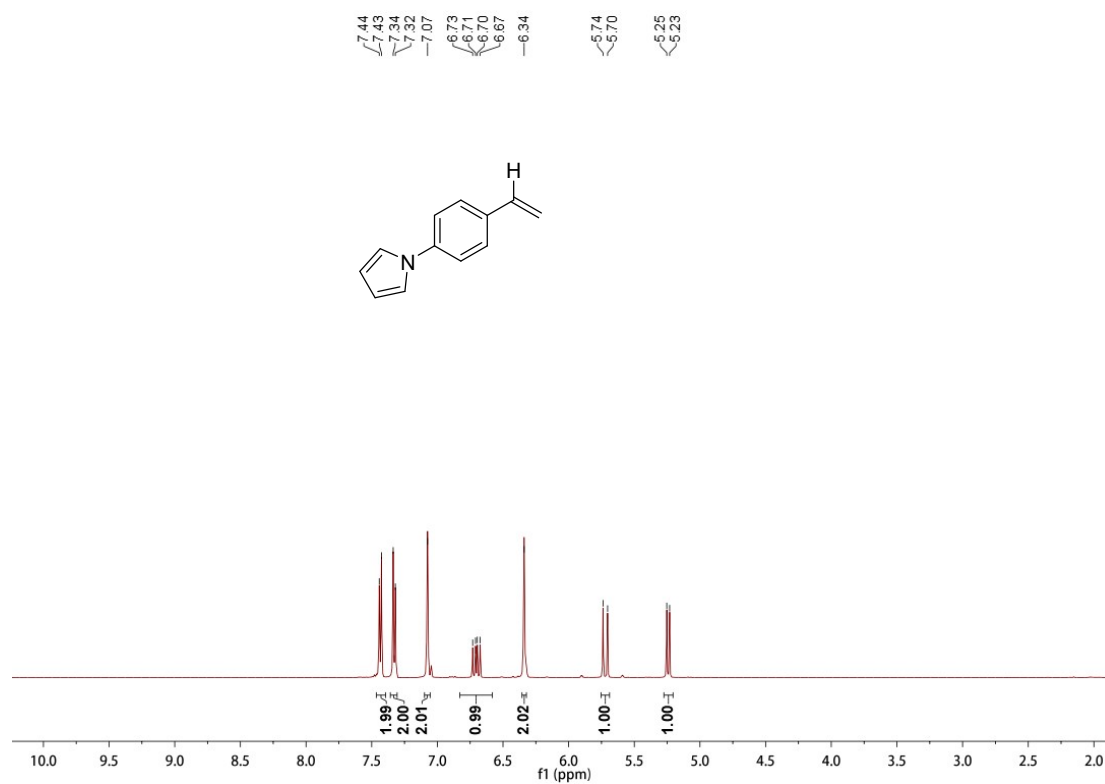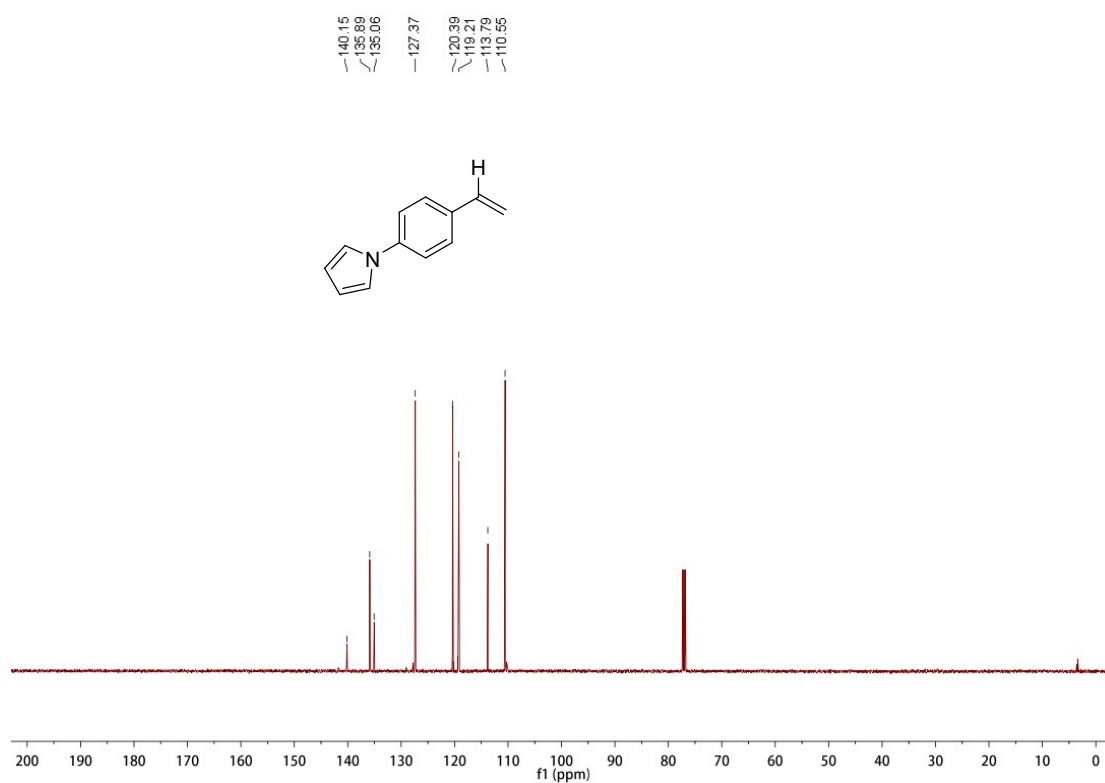

**(E)-hex-1-en-1-ylbenzene (3p)**

7.27  
7.26  
7.22  
7.21  
7.19  
7.12  
7.11  
6.09  
6.02  
6.19  
6.15  
6.15  
6.12

2.16  
2.15  
2.13  
2.12  
1.39  
1.37  
1.31  
1.29  
0.85  
0.84

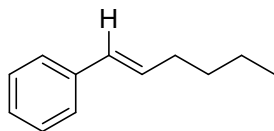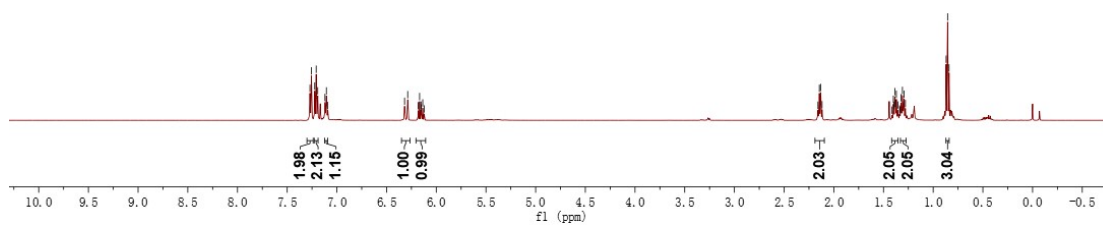

138.00  
131.22  
129.73  
128.47  
126.75  
125.92

32.73  
31.56  
22.29  
13.97

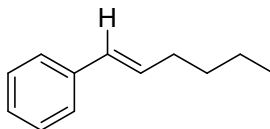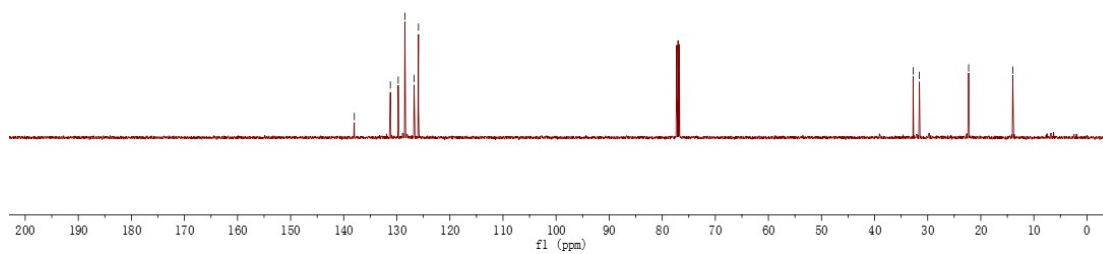



# (E)-dodec-1-en-1-ylbenzene (3q)

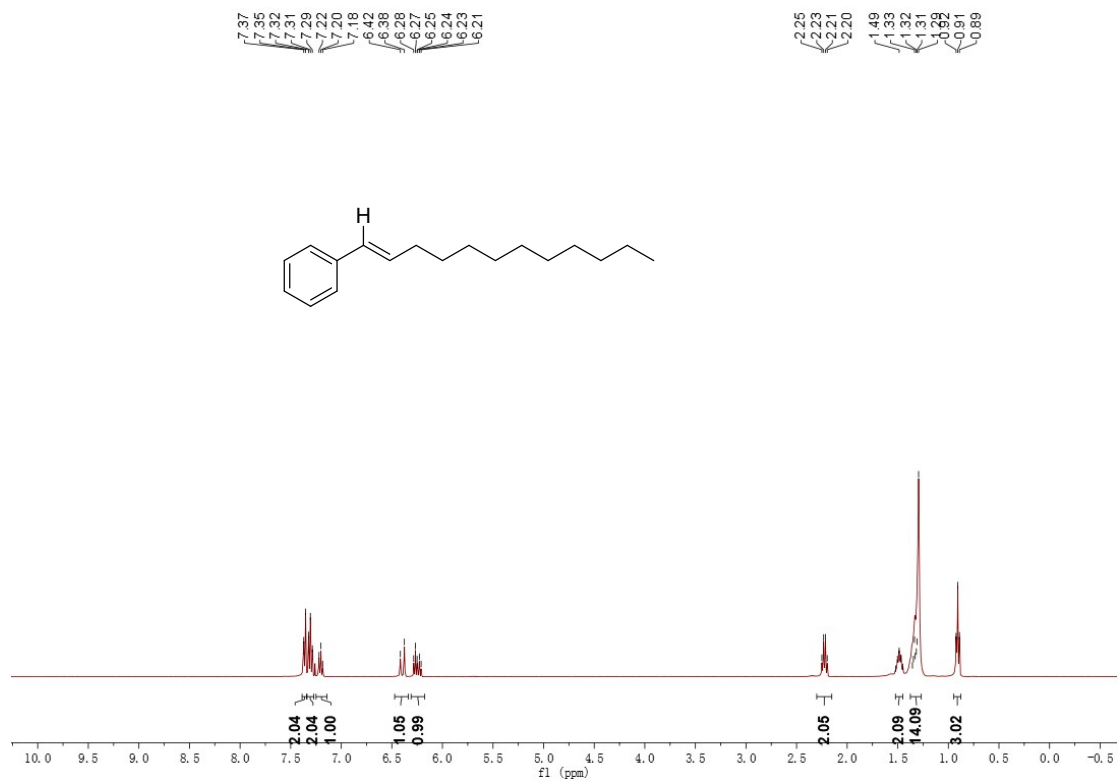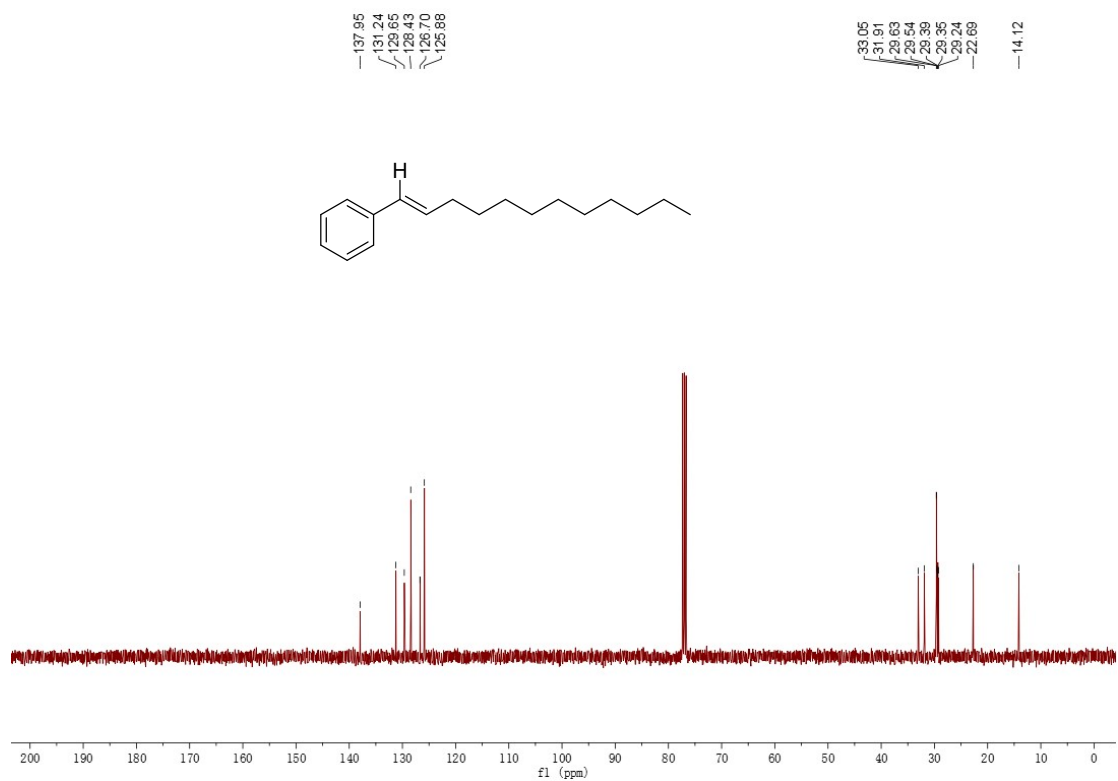

**(E)-tert-butyldimethyl((6-phenylhex-5-en-1-yl)oxy)silane (3r)**

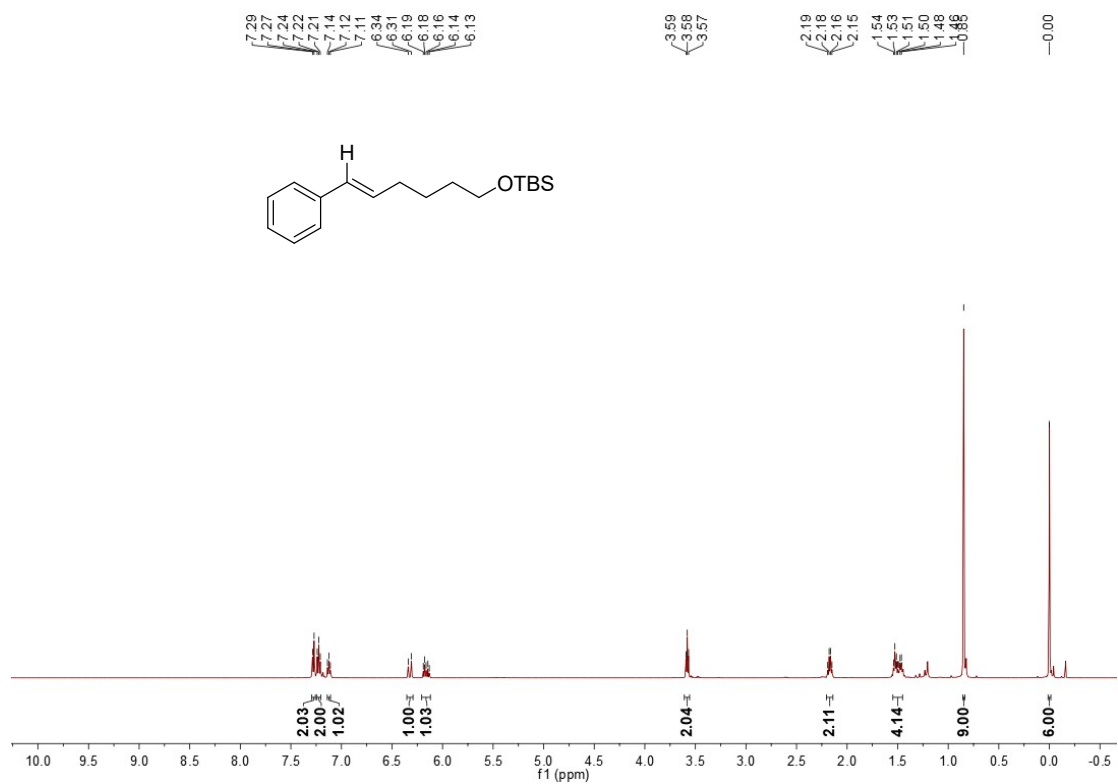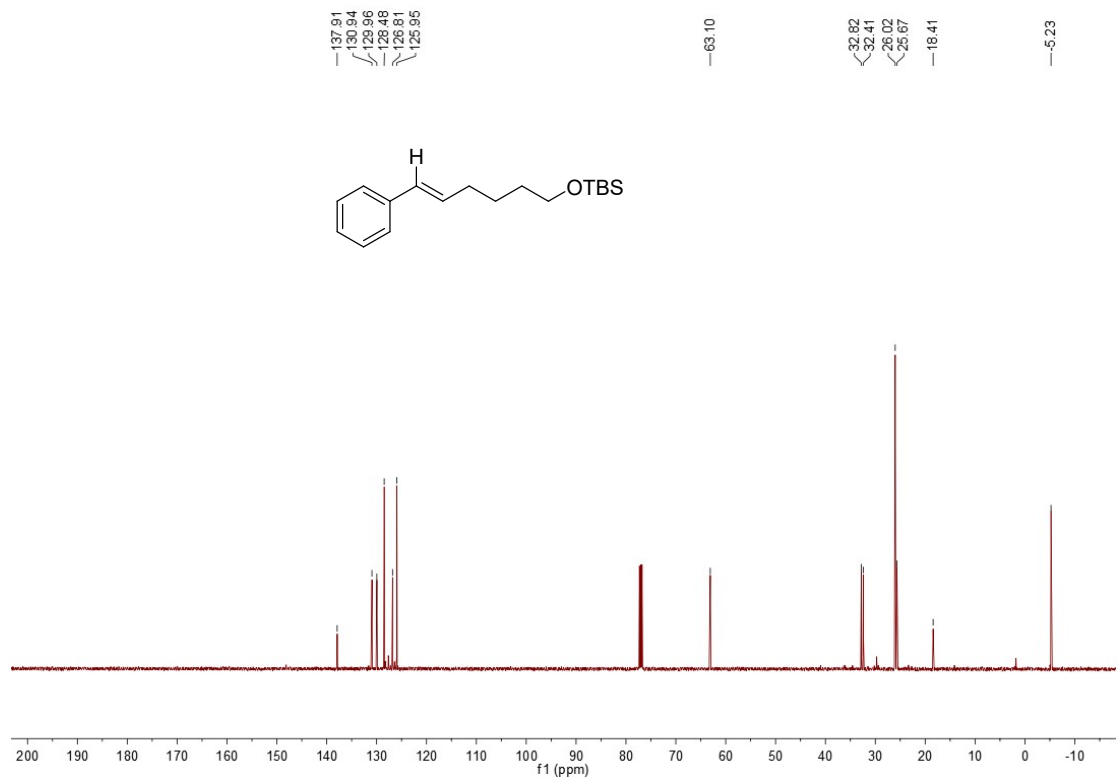

**(E)-N,N-dimethyl-4-((6-phenylhex-5-en-1-yl)oxy)aniline (3s)**

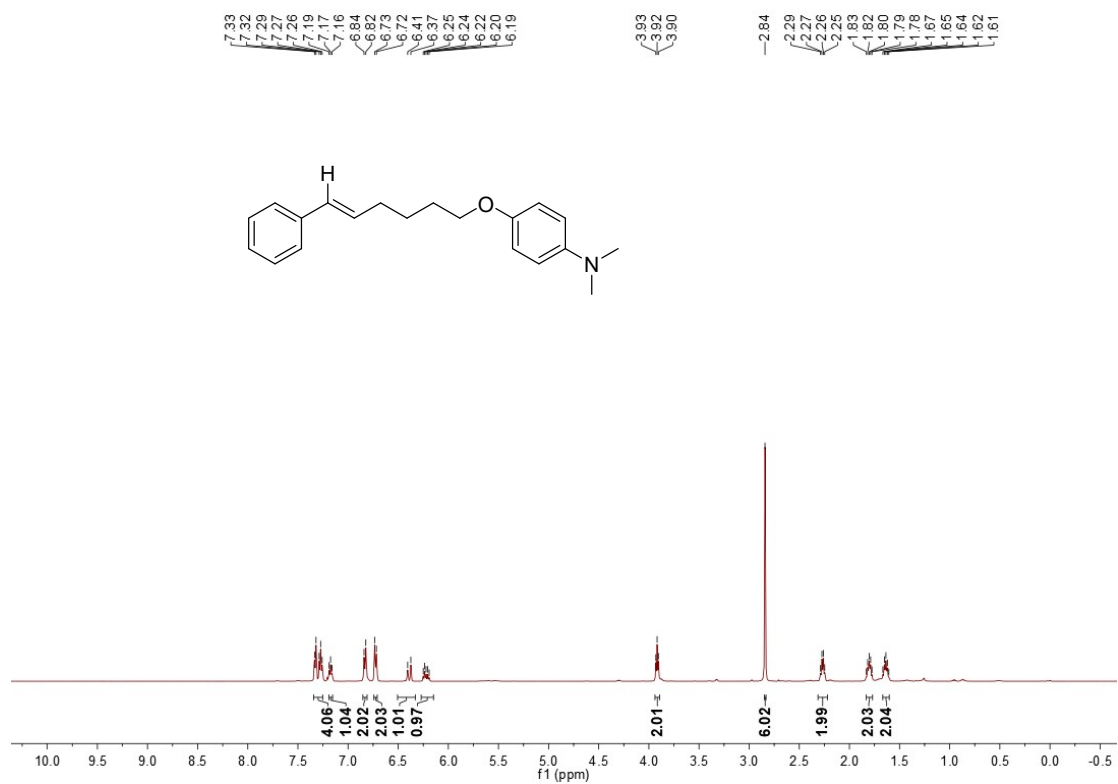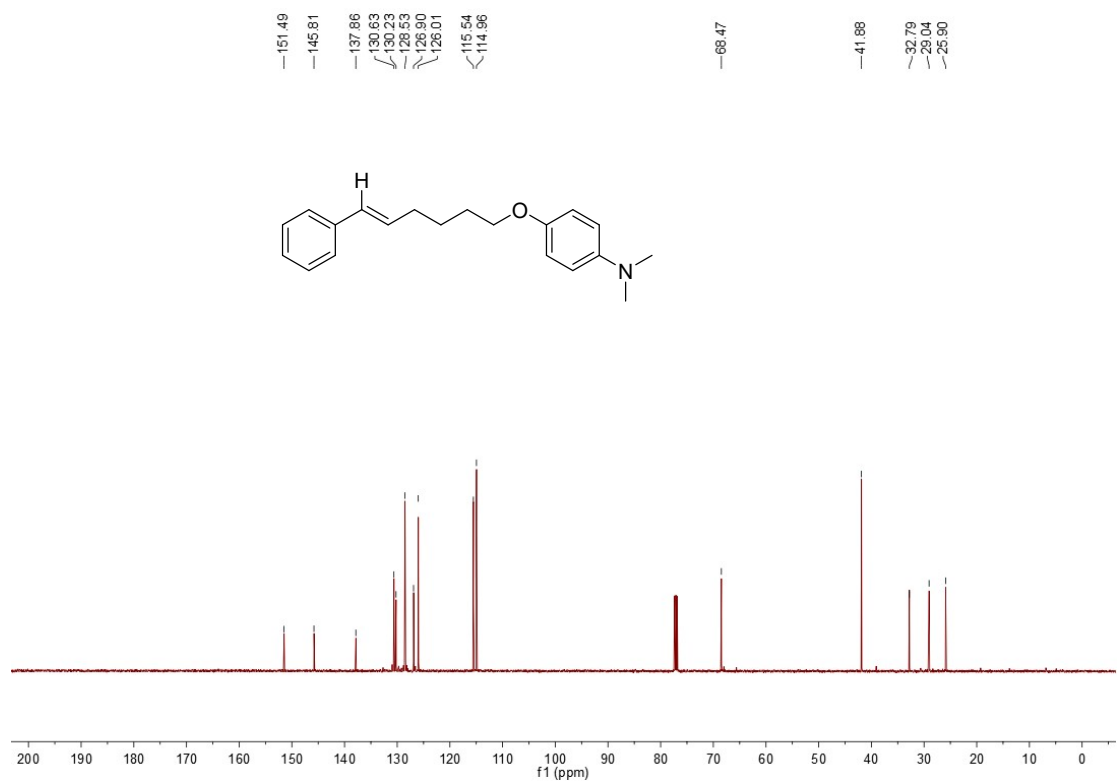

**(E)-pent-1-ene-1,3-diylidibenzene (3t)**

7.36  
7.34  
7.32  
7.30  
7.28  
7.26  
7.25  
7.24  
7.23  
7.23  
7.21  
7.19  
7.17  
6.43  
6.39  
6.37  
6.35  
6.33  
6.31

3.34  
3.33  
3.31  
3.29

1.88  
1.87  
1.86  
1.84  
1.82  
1.81  
1.80  
0.94  
0.92  
0.90

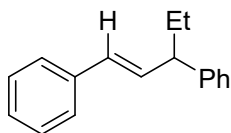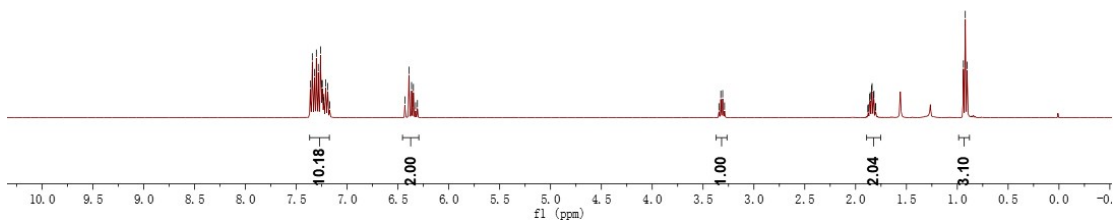

144.55  
137.63  
134.25  
129.46  
128.49  
127.72  
127.03  
126.21  
126.15

-51.00

-28.81

-12.32

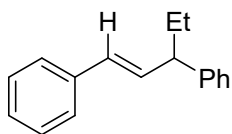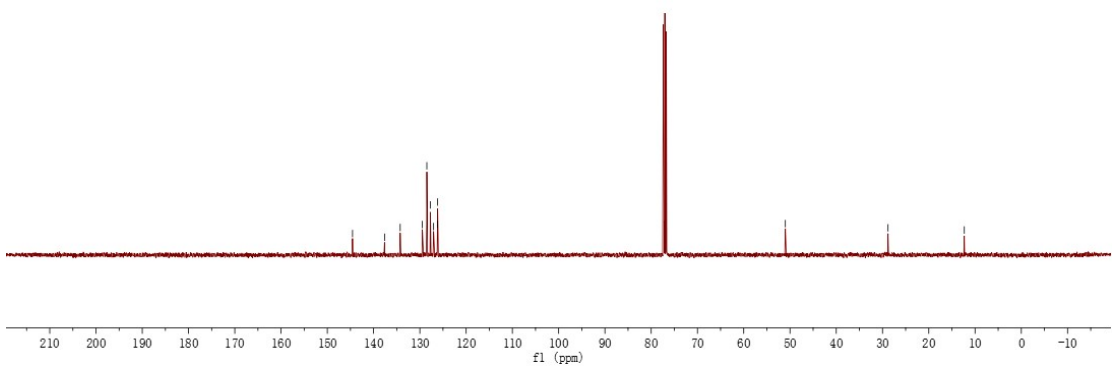

# 1,1,2,4,4,7-hexamethyl-6-vinyl-1,2,3,4-tetrahydronaphthalene (3aa)

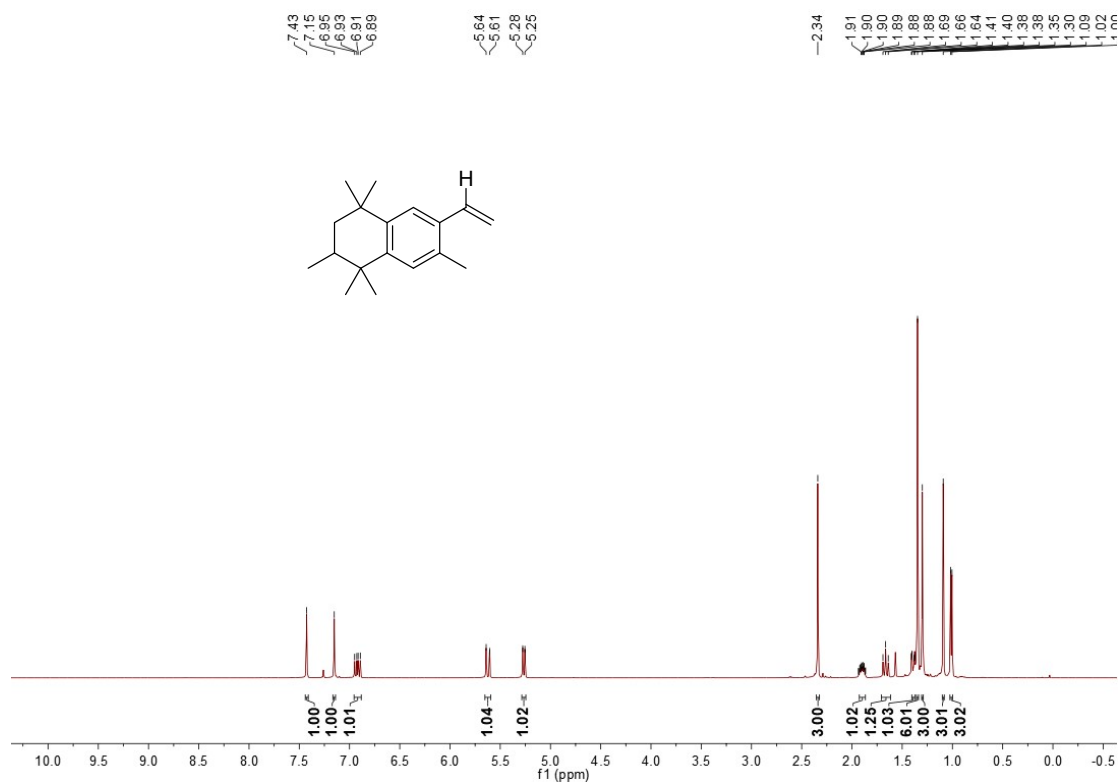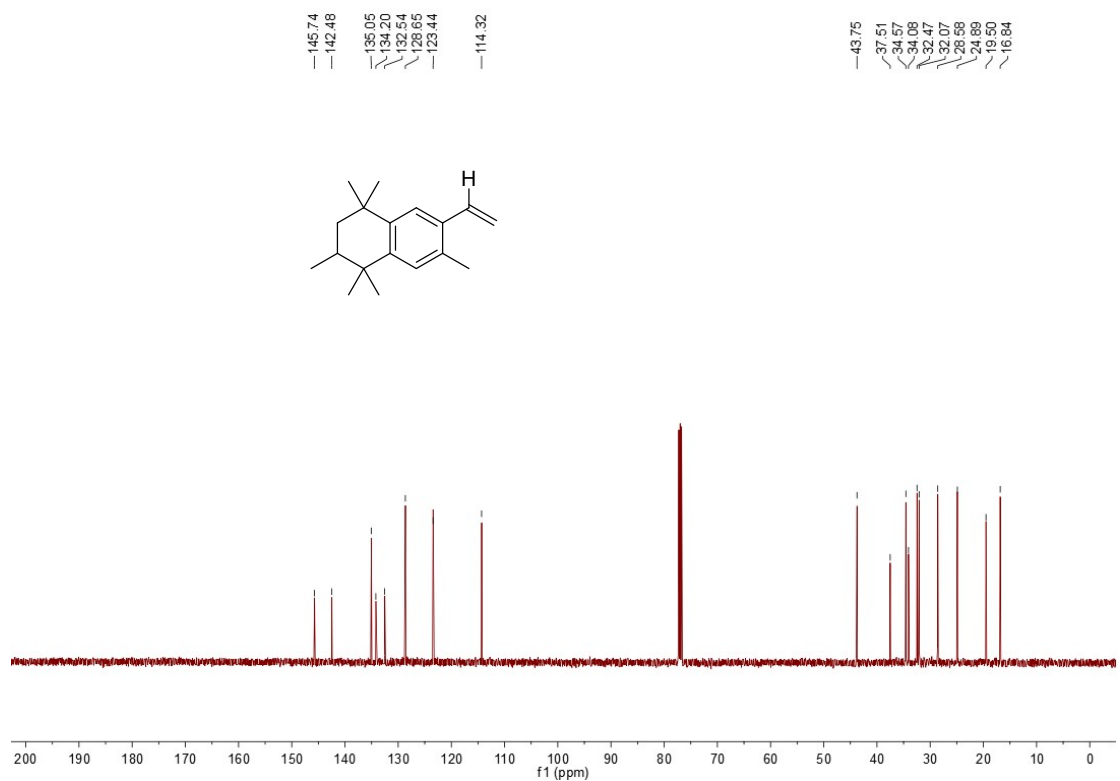

# 1-((3,7-dimethyloct-6-en-1-yl)oxy)-4-vinylbenzene (3ab)

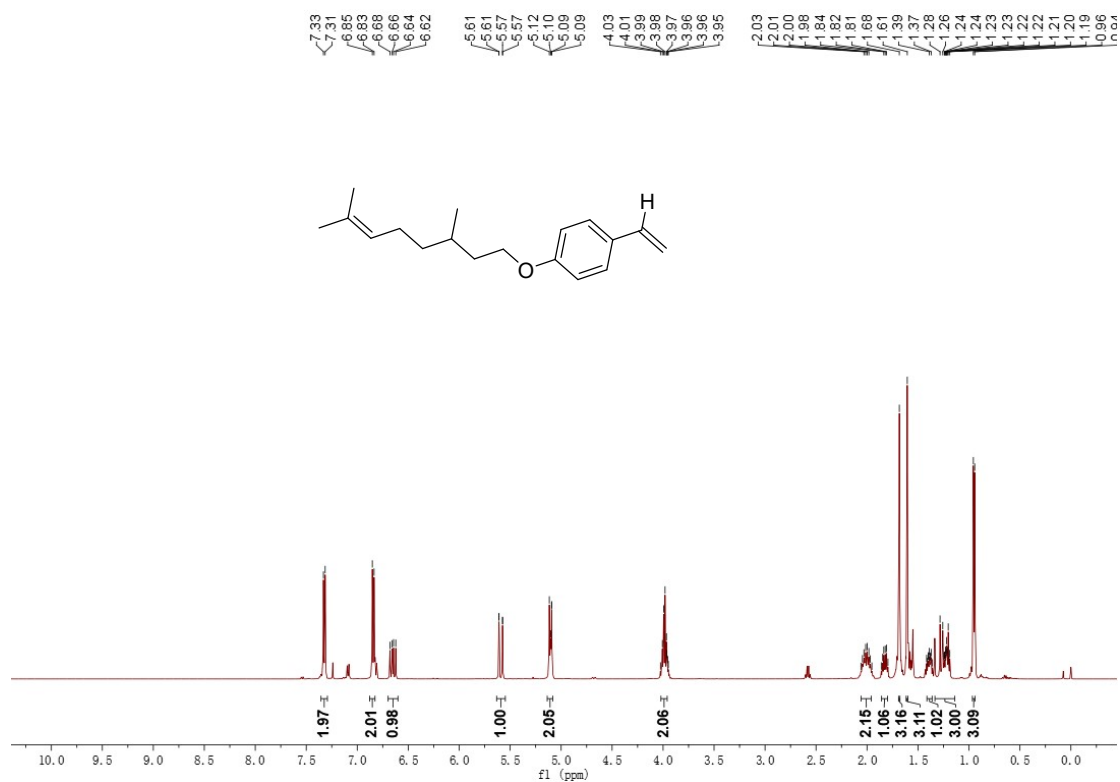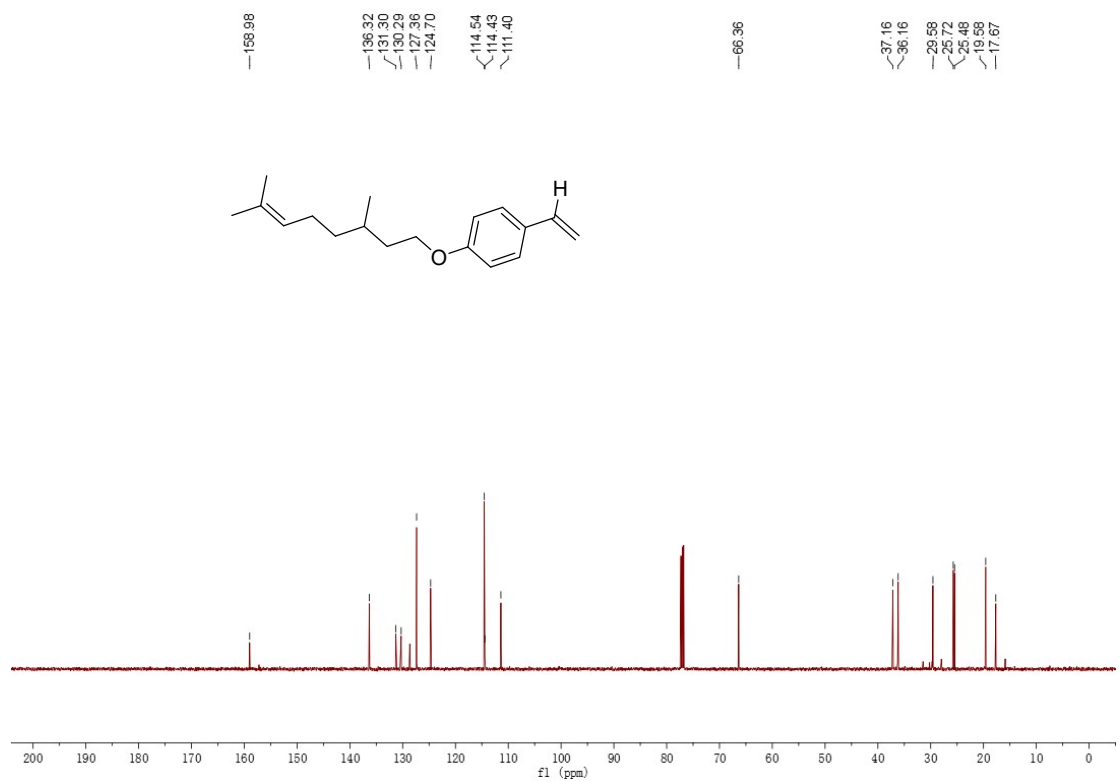

# (1R,2S,5R)-2-isopropyl-5-methylcyclohexyl 4-vinylbenzoate (3ac)

8.01, 7.99, 7.47, 7.45, 6.76, 6.74, 6.72, 5.87, 5.84, 5.38, 5.36, 4.95, 4.94, 4.93, 4.92, 4.91, 4.90, 2.14, 2.14, 2.12, 2.12, 2.11, 1.98, 1.97, 1.96, 1.96, 1.95, 1.94, 1.74, 1.73, 1.72, 1.71, 1.58, 1.57, 1.56, 1.56, 1.55, 1.55, 1.55, 1.54, 1.53, 1.53, 1.26, 1.26, 1.25, 1.23, 1.23, 1.15, 1.15, 1.14, 1.14, 1.12, 1.12, 1.11, 1.11, 1.10, 1.10, 1.09, 1.09, 1.08, 1.08, 0.93, 0.93, 0.81, 0.81, 0.80, 0.79

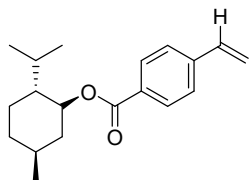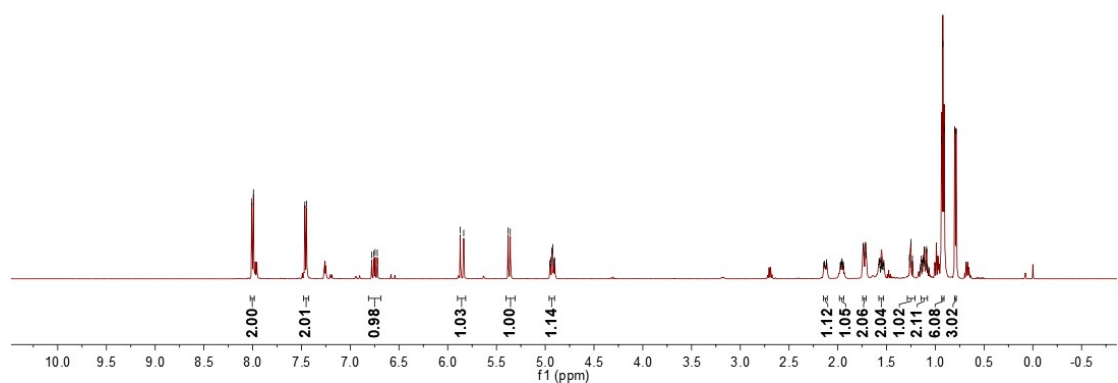

165.86, 141.74, 136.07, 130.00, 129.85, 126.03, 116.30, 74.80, 47.28, 40.98, 34.33, 31.44, 26.53, 23.68, 20.71, 16.55

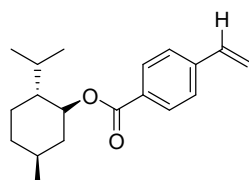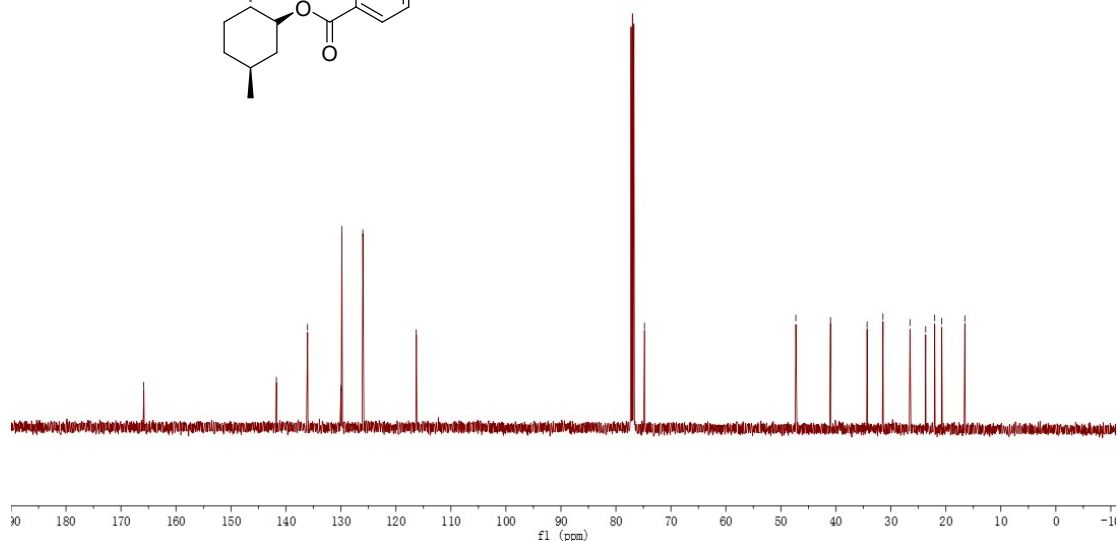

**(1S,2R,4S)-1,7,7-trimethylbicyclo[2.2.1]heptan-2-yl 4-vinylbenzoate (3ad)**

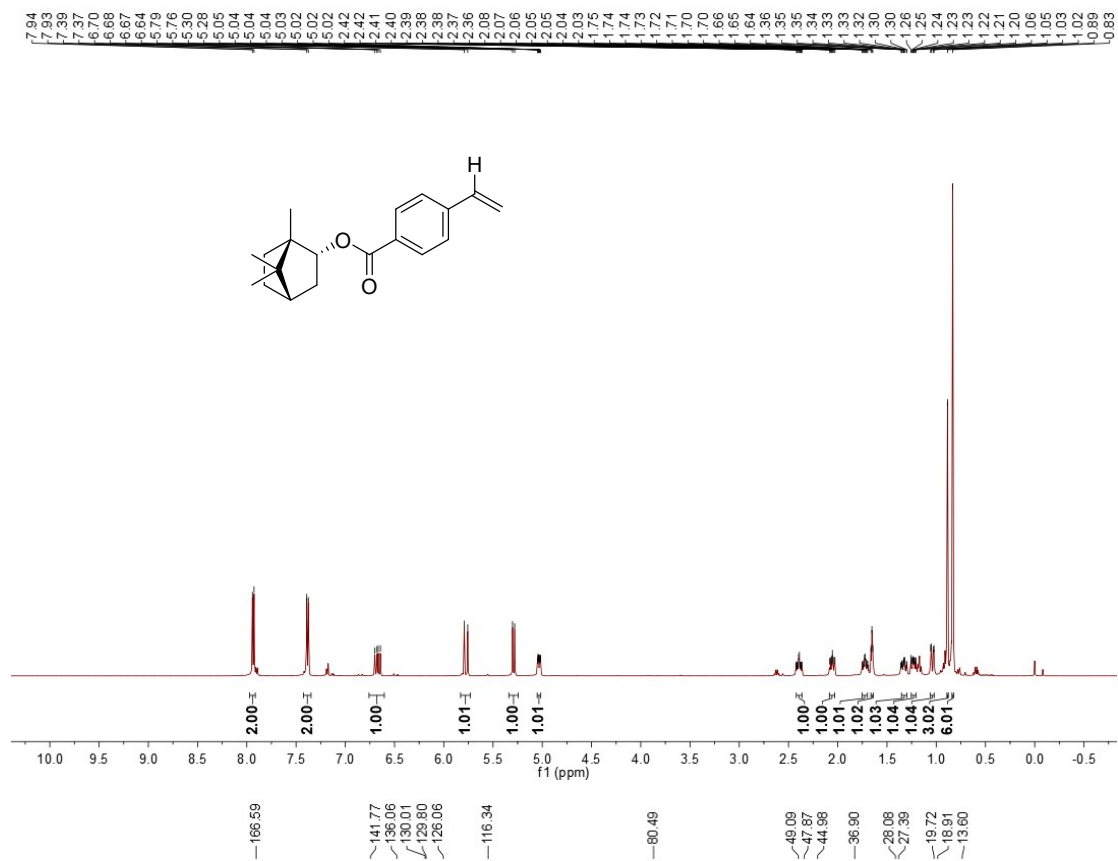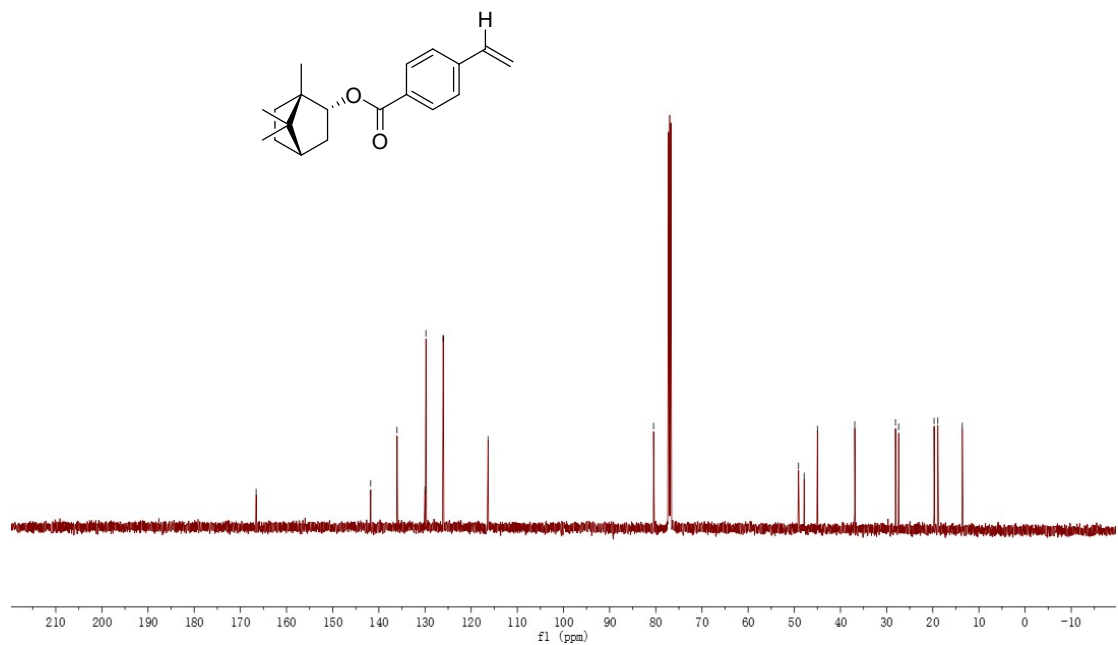



**(3aS,5S,6R,6aS)-5-((R)-2,2-dimethyl-1,3-dioxolan-4-yl)-2,2-dimethyltetrahydrofuro[2,3-d][1,3]dioxol-6-yl 4-vinylbenzoate (3ae)**

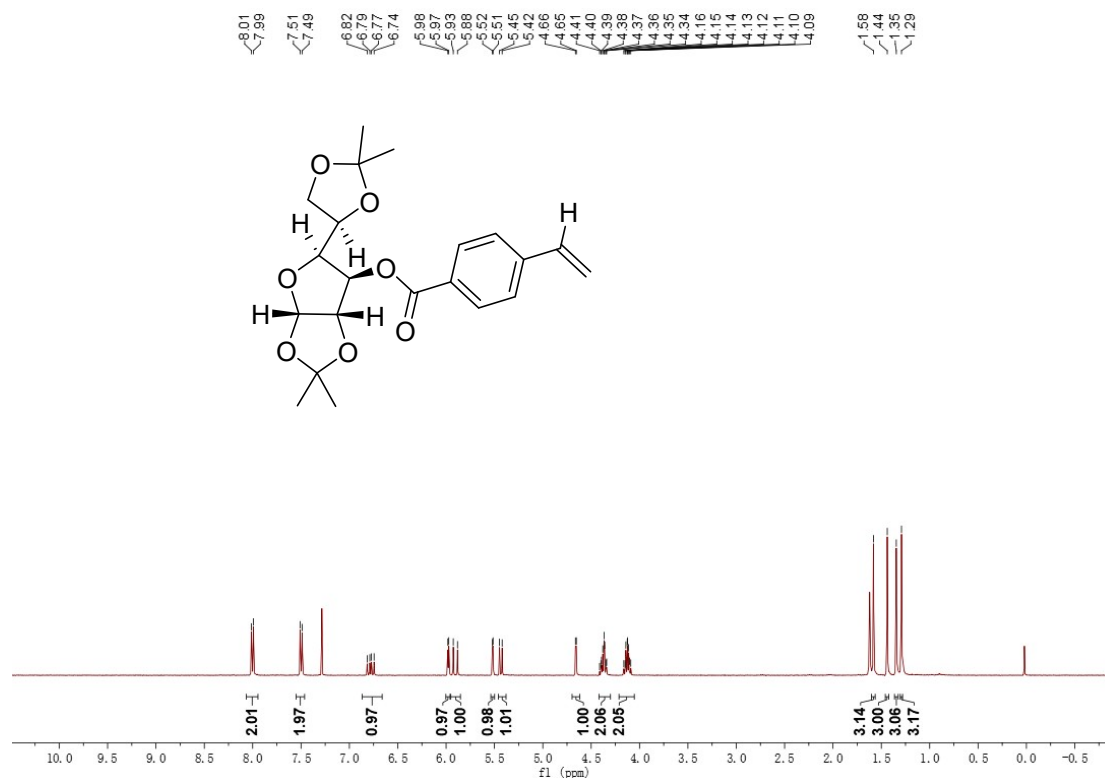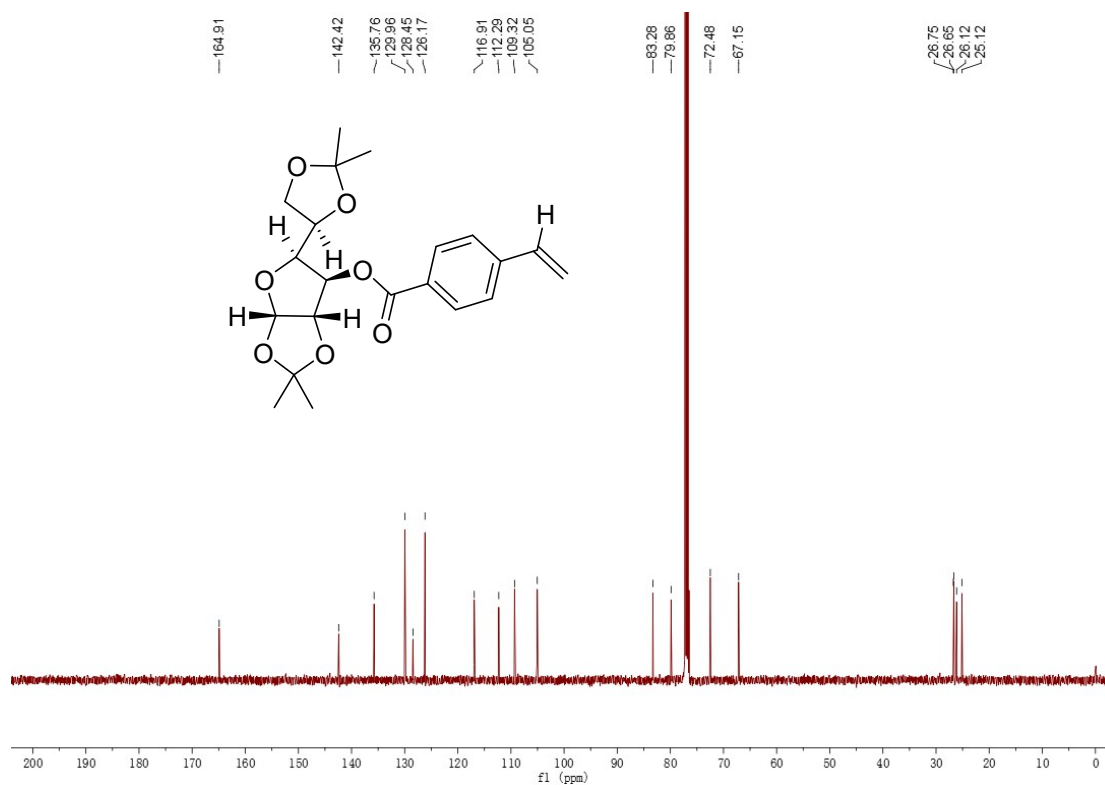

# triethyl(1-(p-tolyl)ethyl)silane (4a)

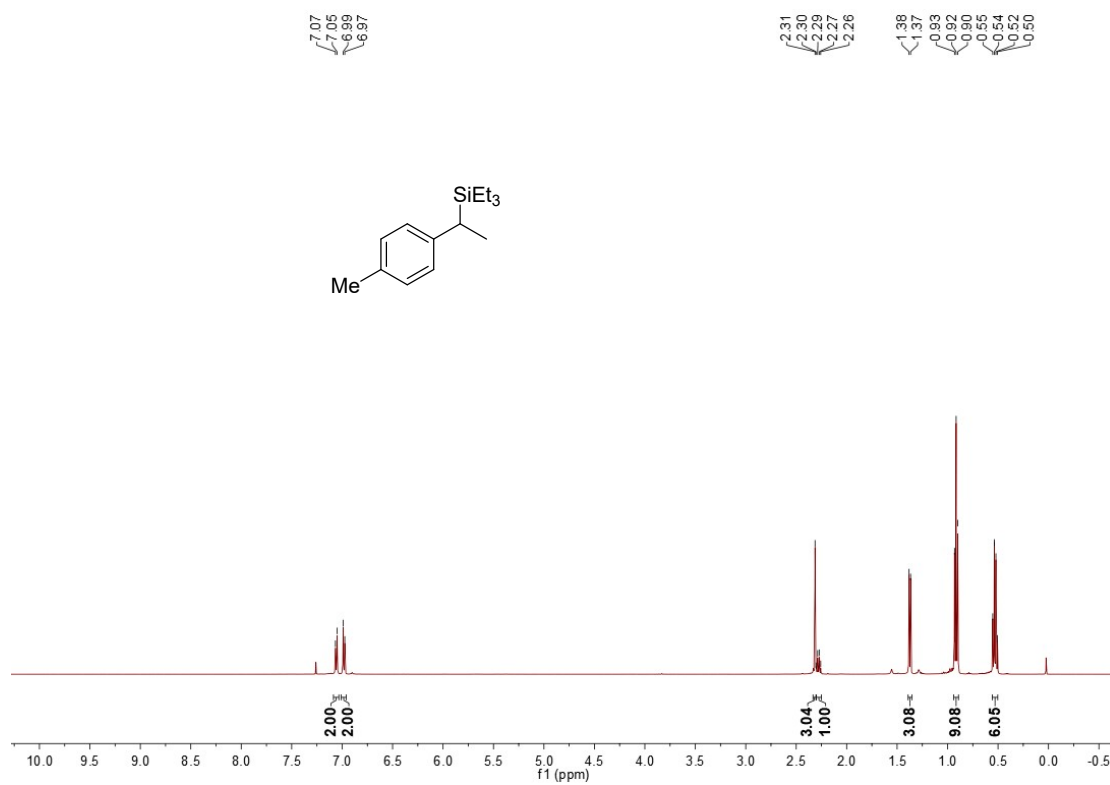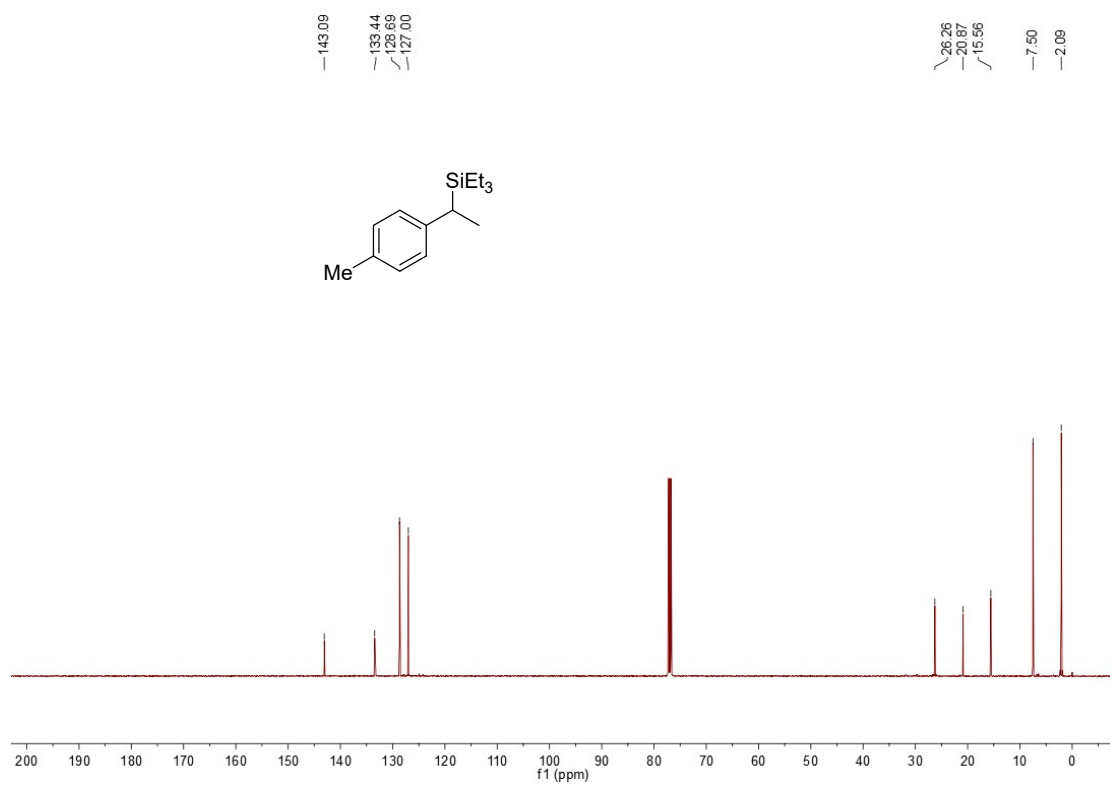

# (1-([1,1'-biphenyl]-4-yl)ethyl)triethylsilane (4b)

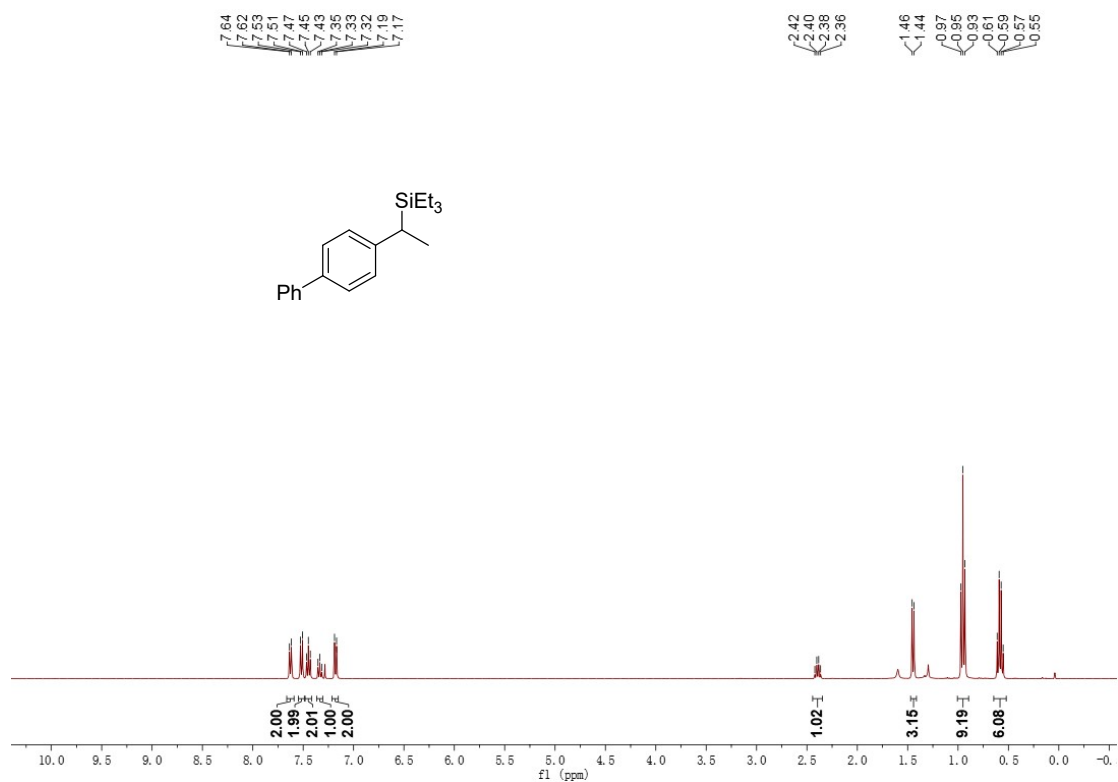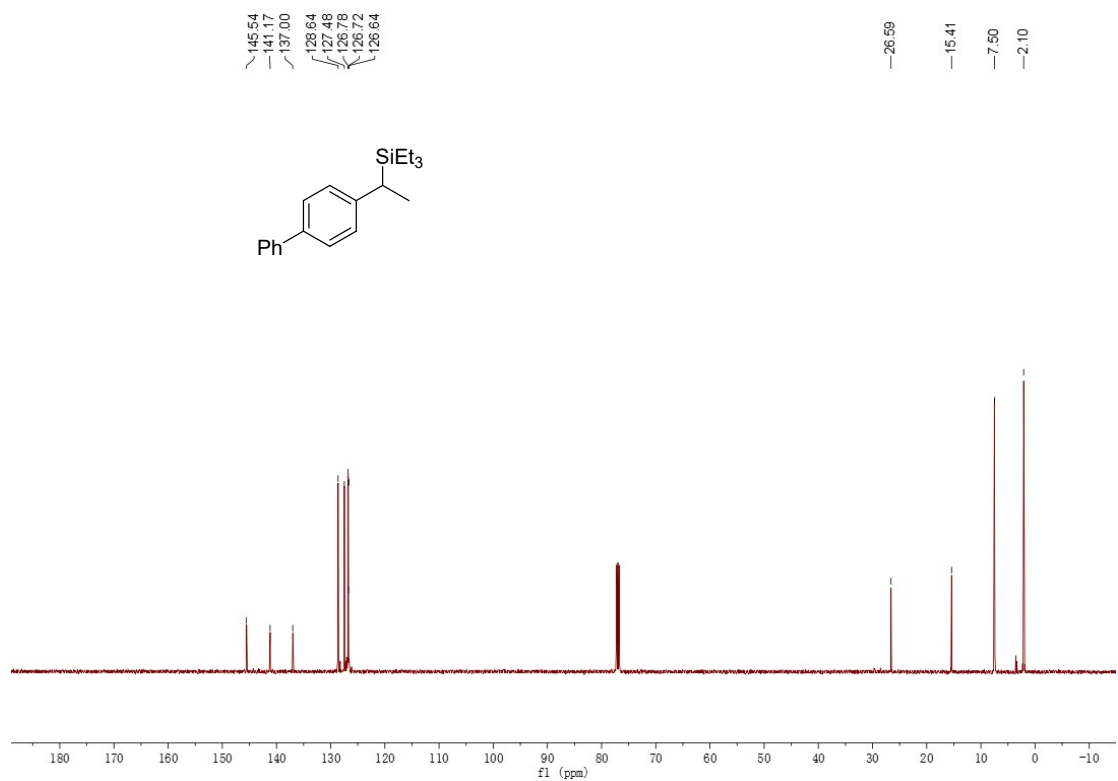

# Triethyl(1-(4-methoxyphenyl)ethyl)silane (4c)

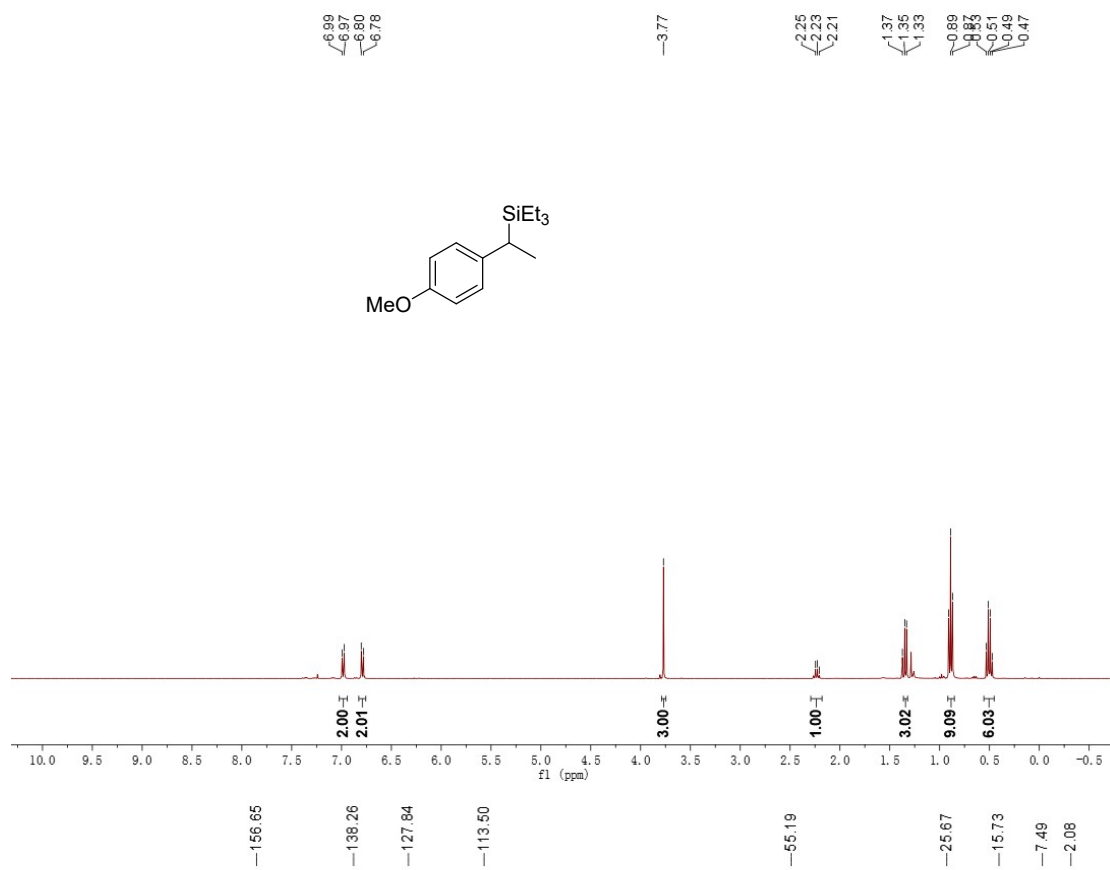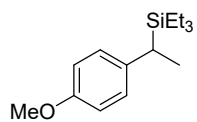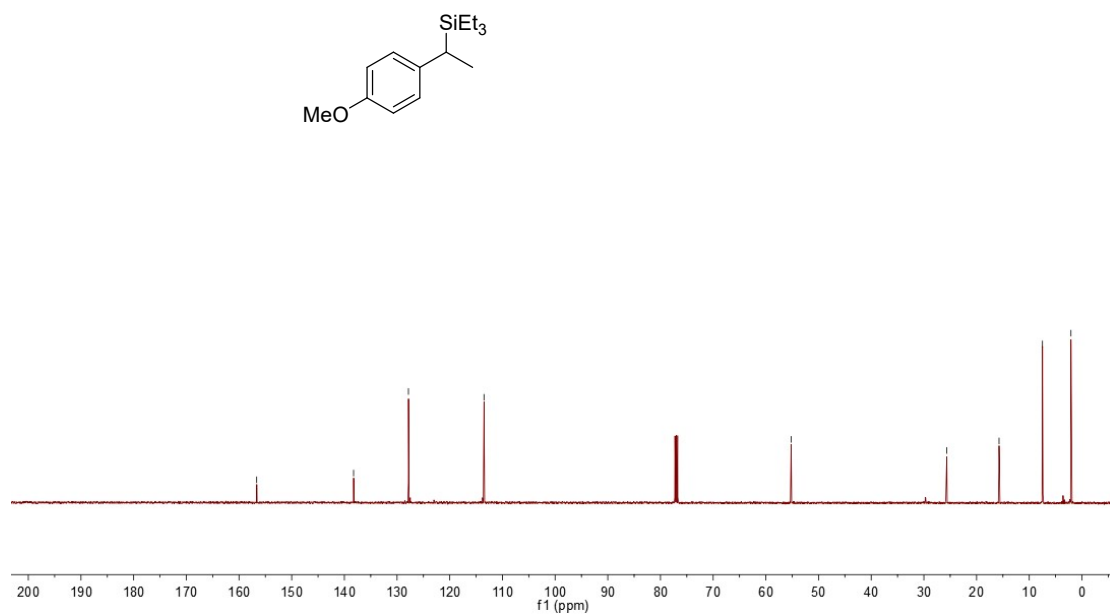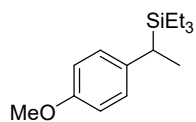

# Butyl 4-(1-(triethylsilyl)ethyl)benzoate (4d)

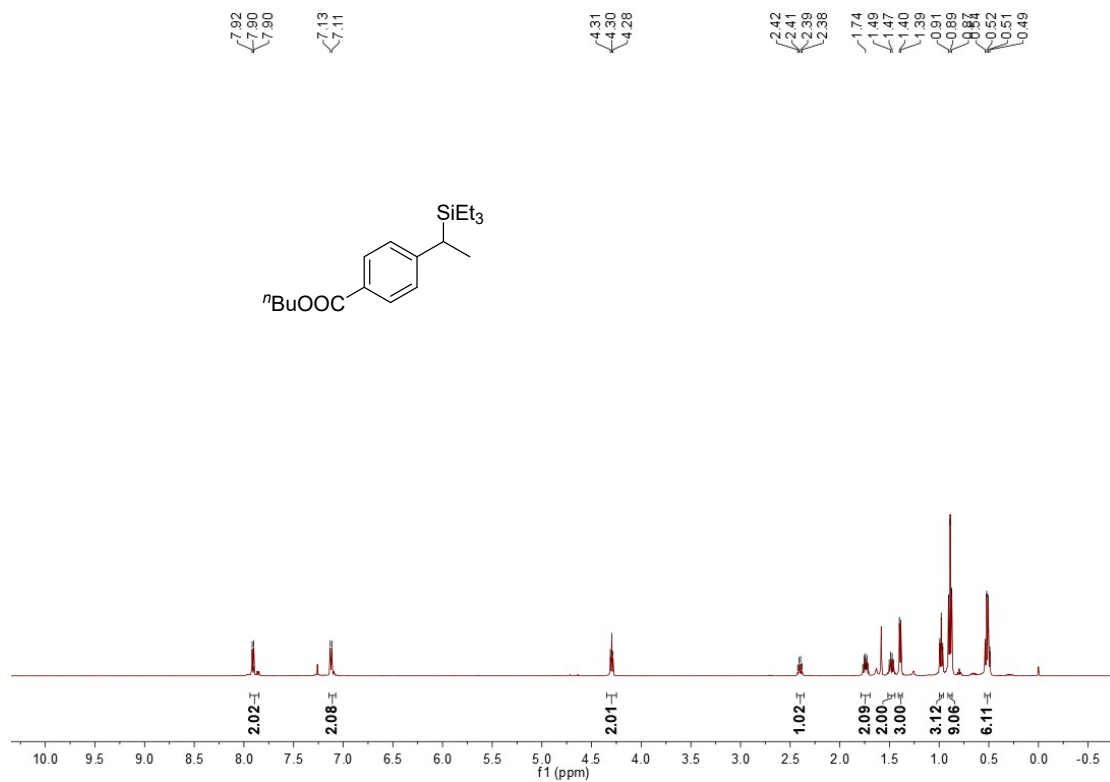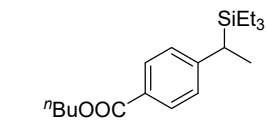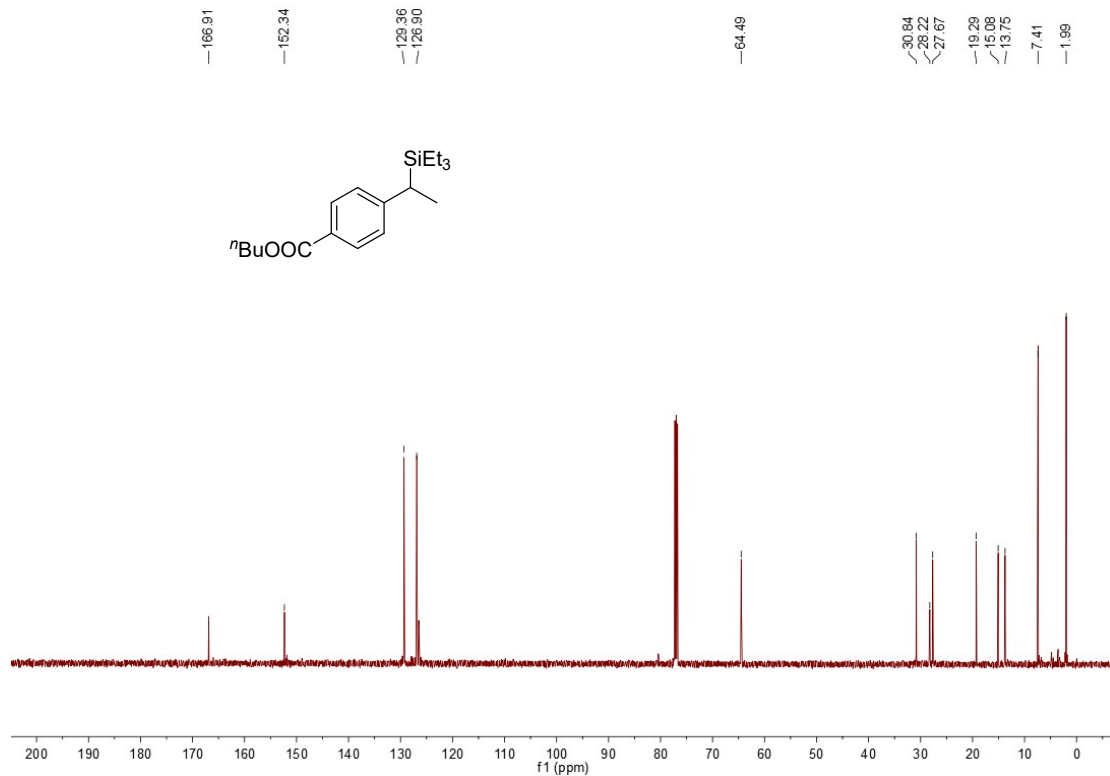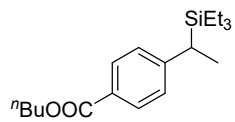

**(1-(benzo[d][1,3]dioxol-5-yl)ethyl)triethylsilane (4e)**

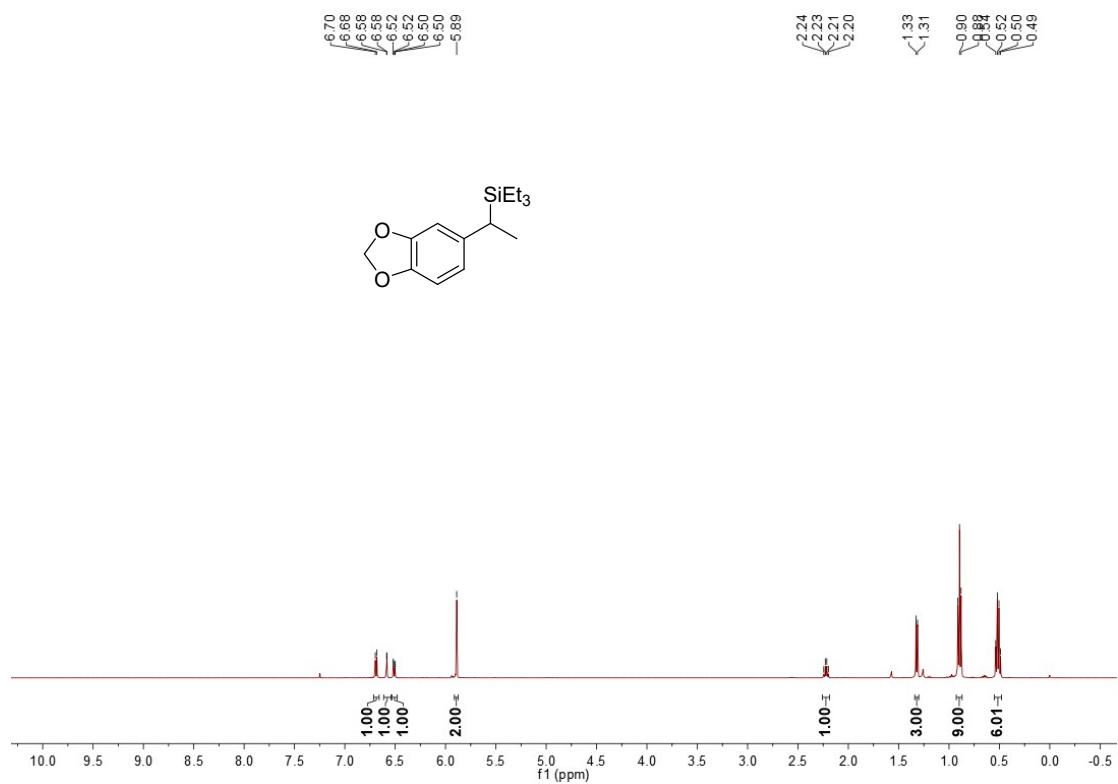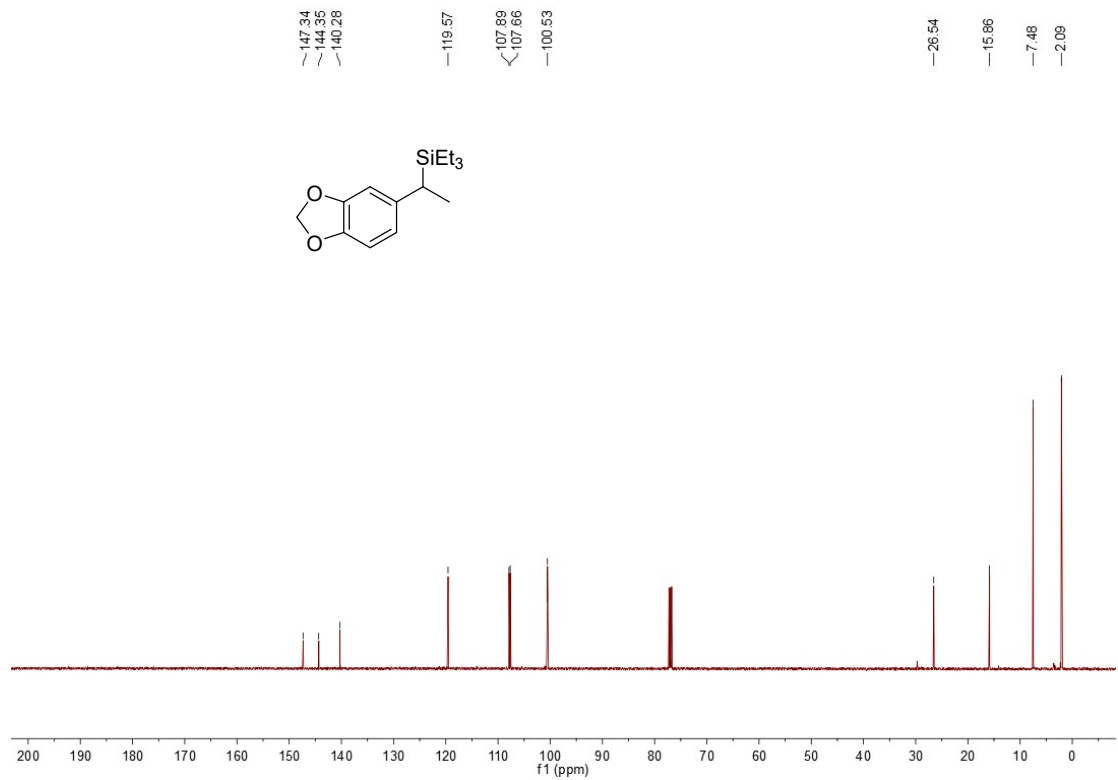

# Triethyl(1-(4-(4,4,5,5-tetramethyl-1,3,2-dioxaborolan-2-yl)phenyl)ethyl)silane (4f)

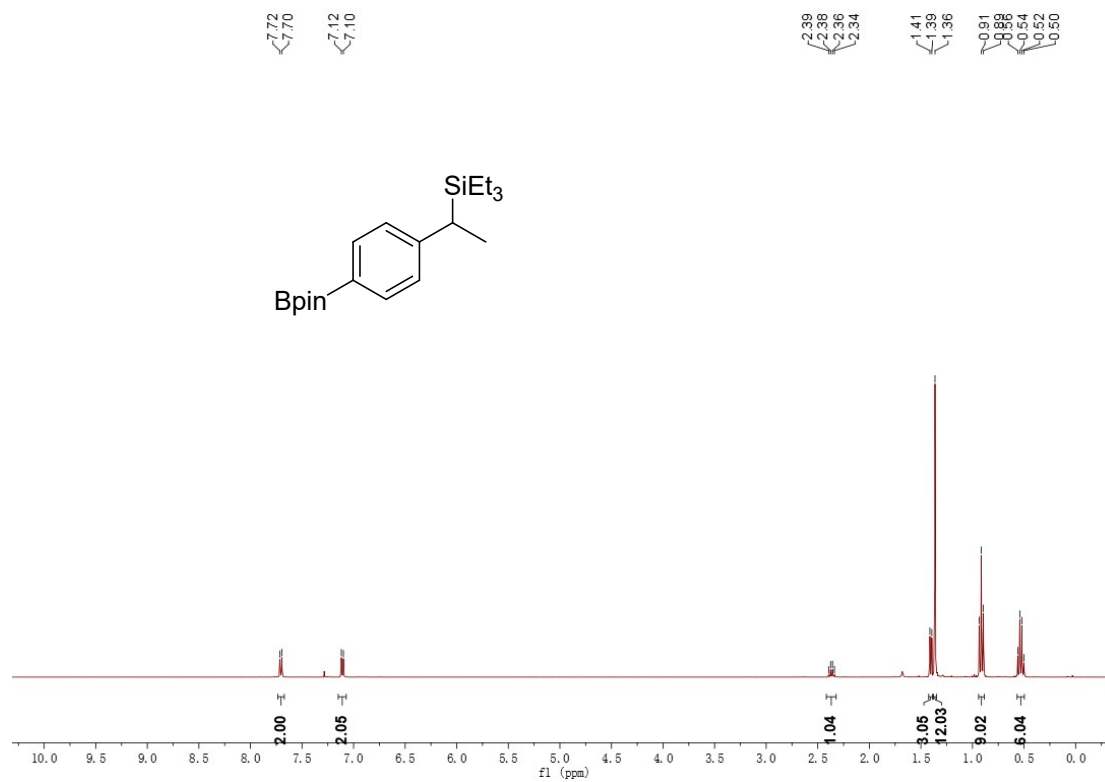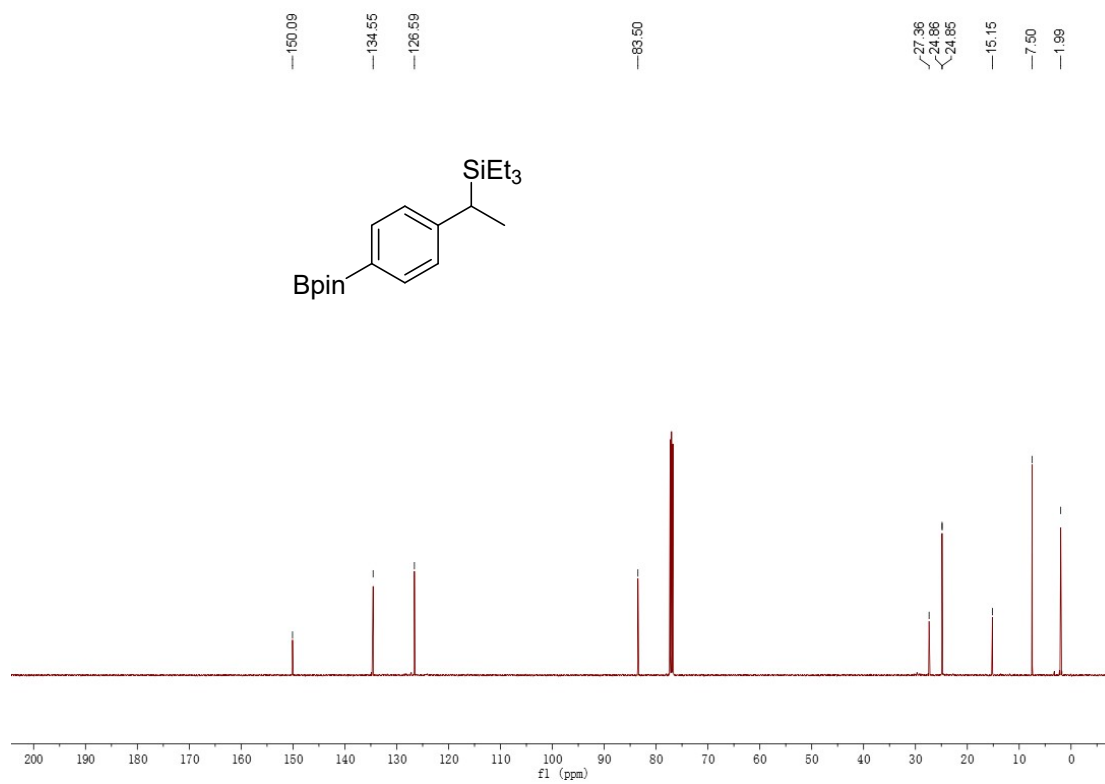

# Tert-butyl dimethyl(4-(1-(triethylsilyl)ethyl)phenoxy)silane (4g)

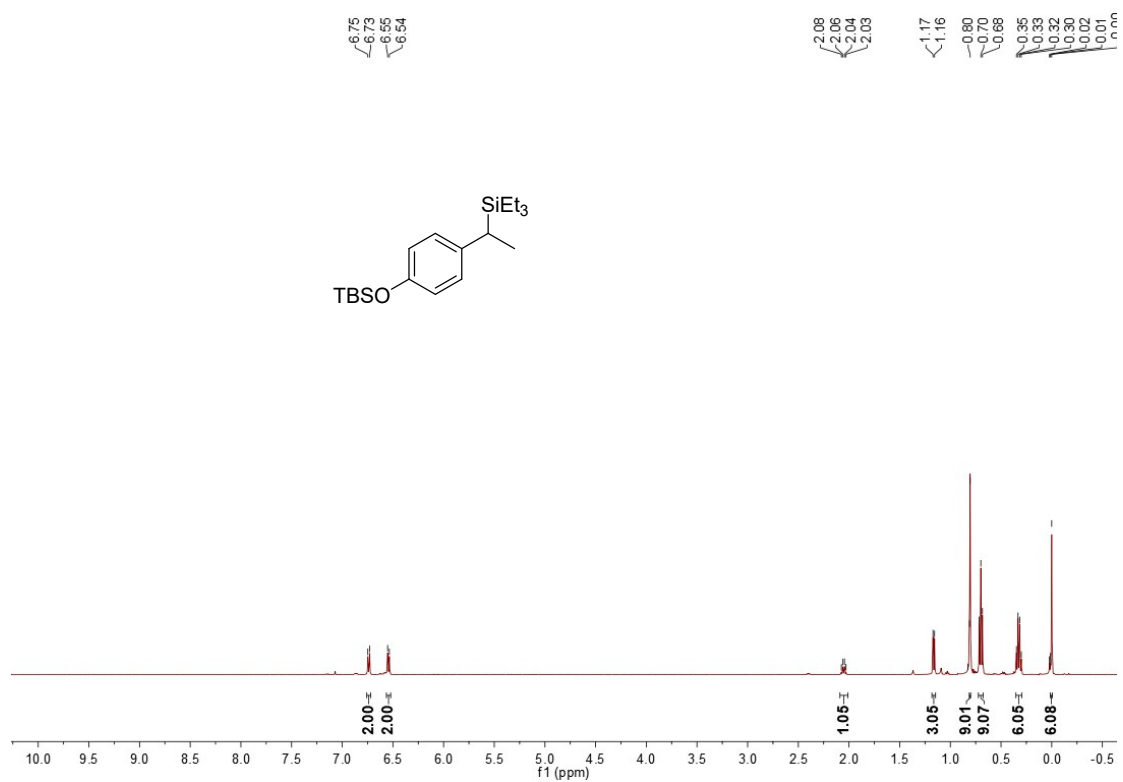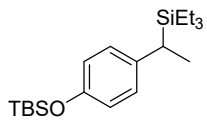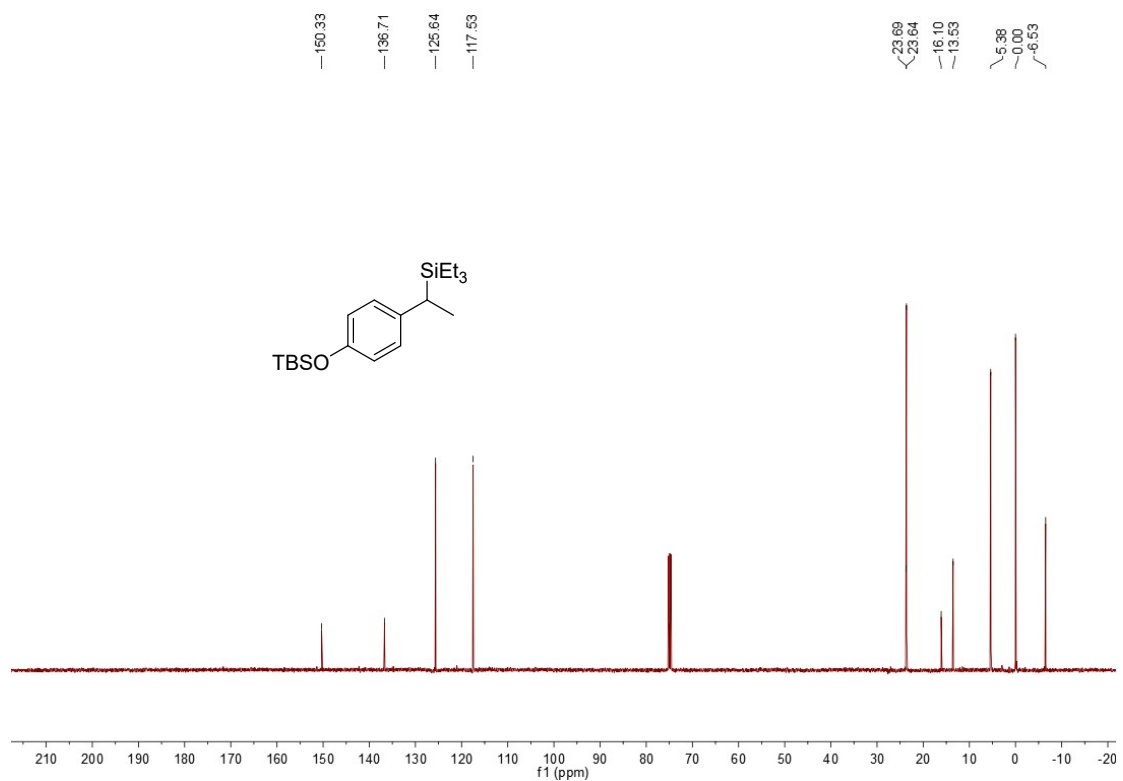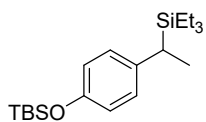



# Triethyl(1-(naphthalen-1-yl)ethyl)silane (4h)

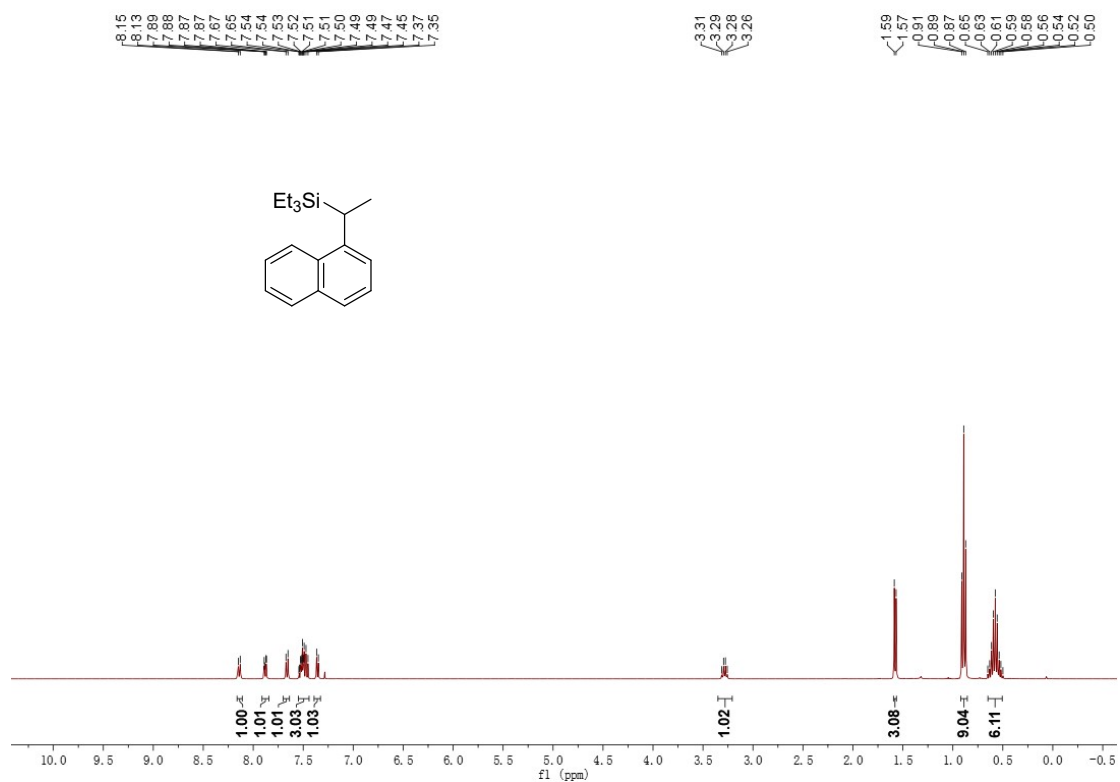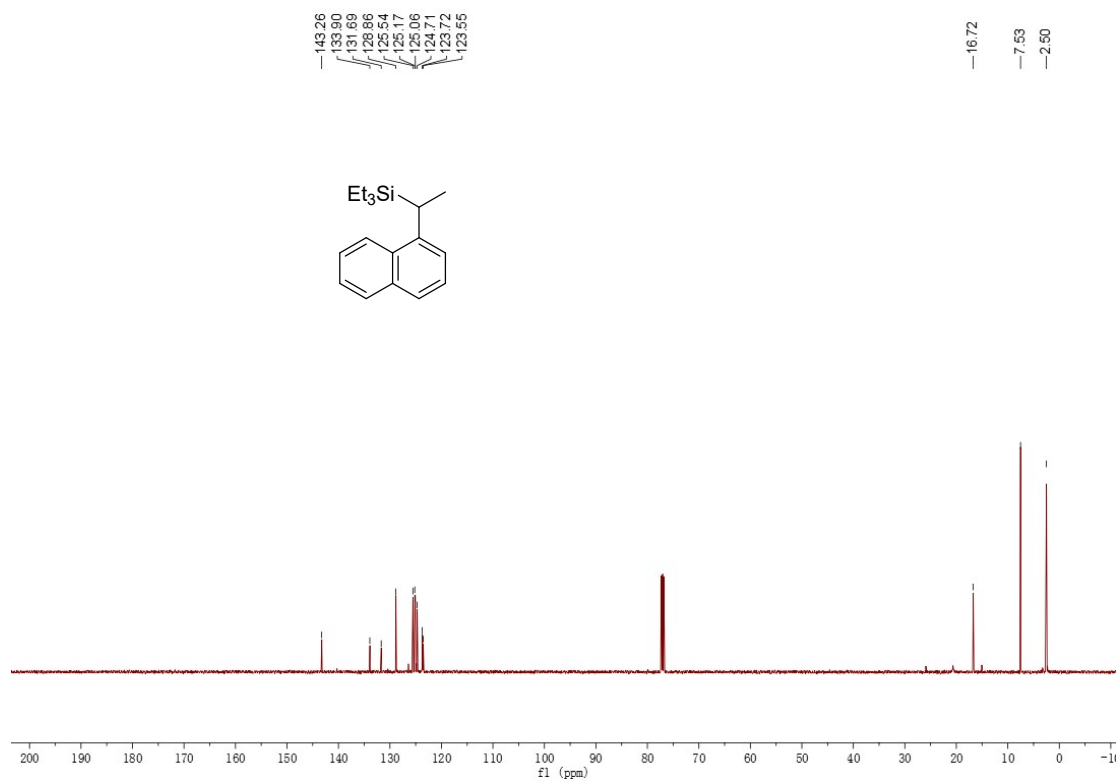

# Triethyl(1-(naphthalen-2-yl)ethyl)silane (4i)

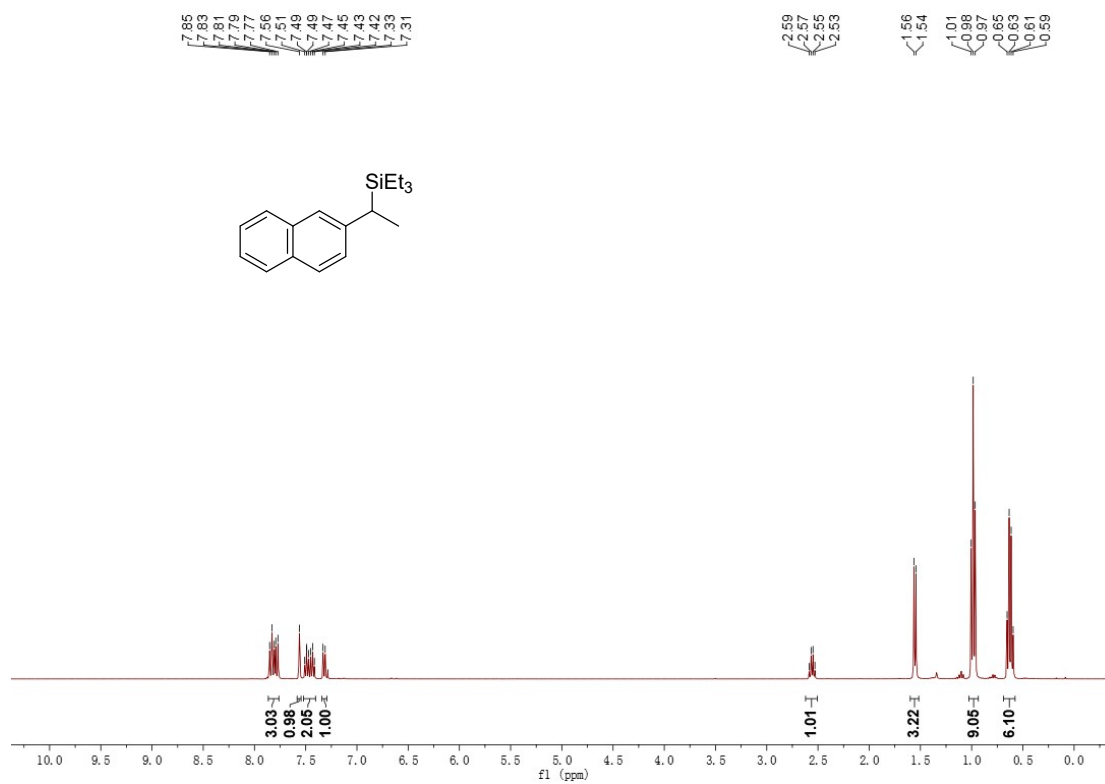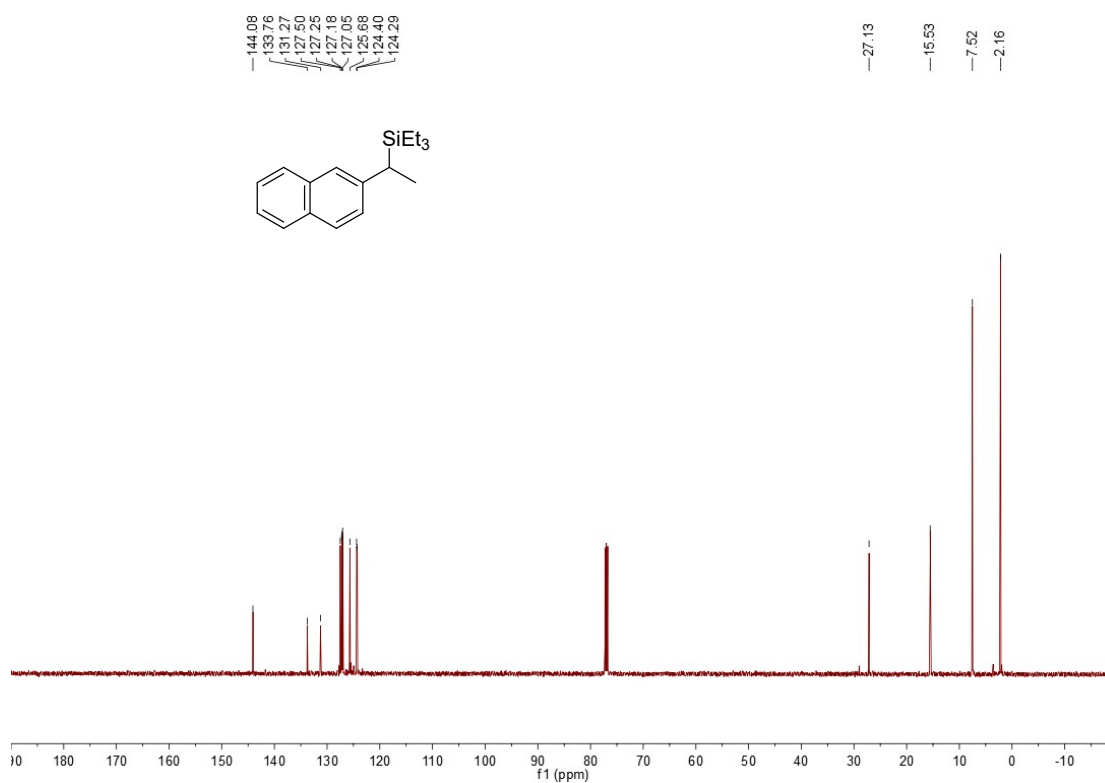

# Triethyl(1-(6-methoxynaphthalen-2-yl)ethyl)silane (4j)

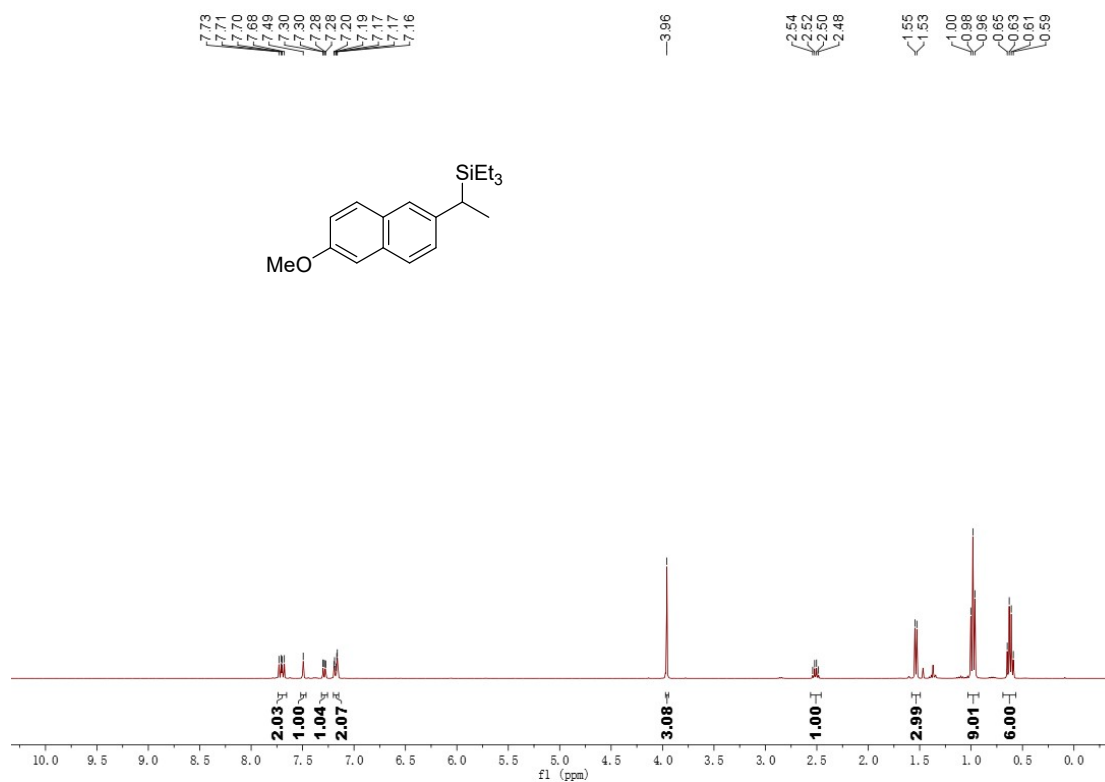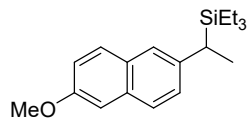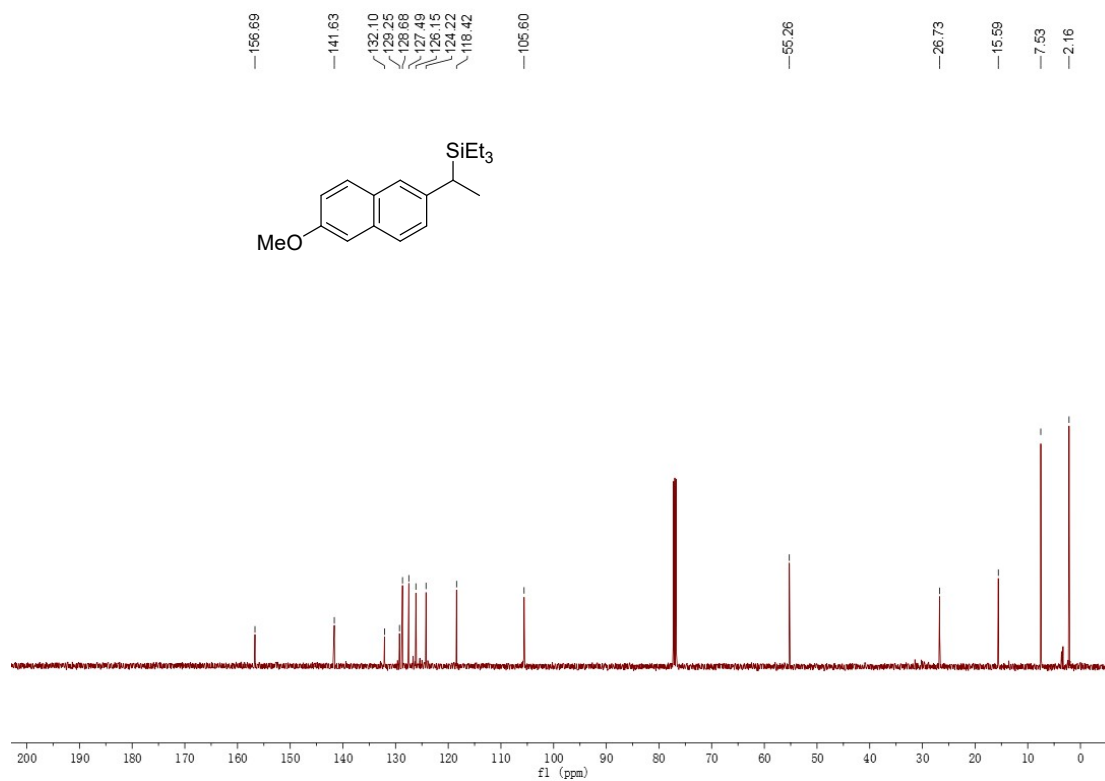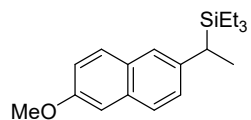

# (1-(9H-fluoren-2-yl)ethyl)triethylsilane (4k)

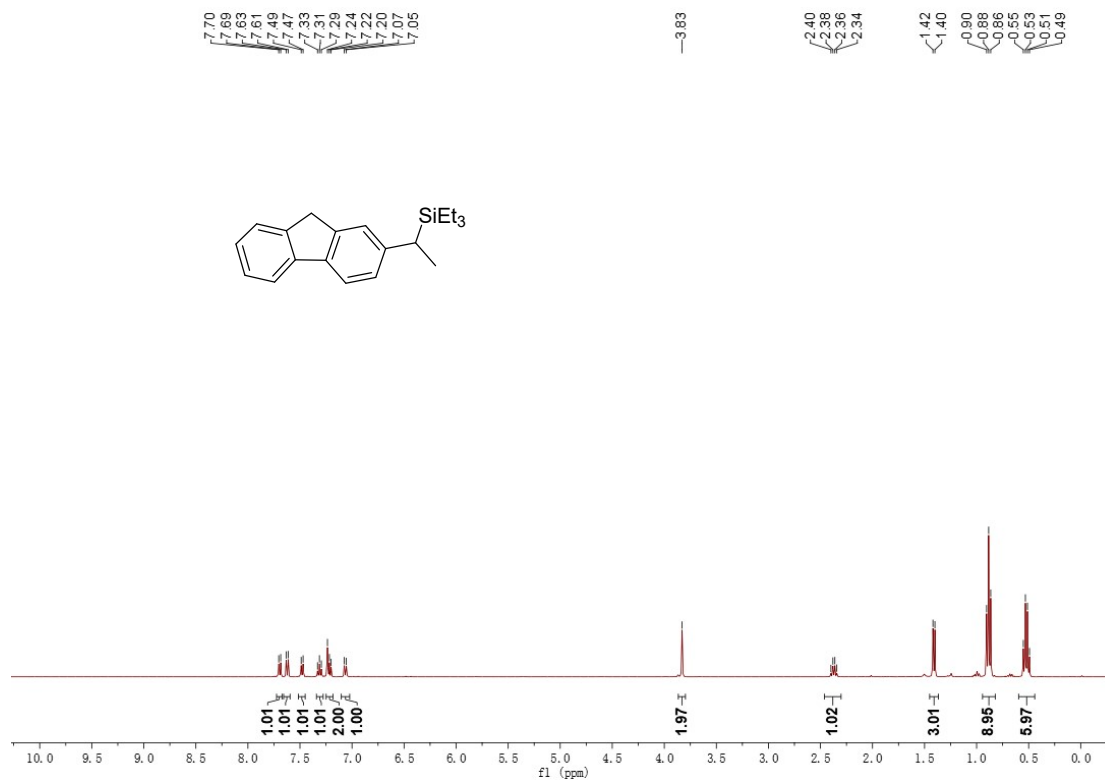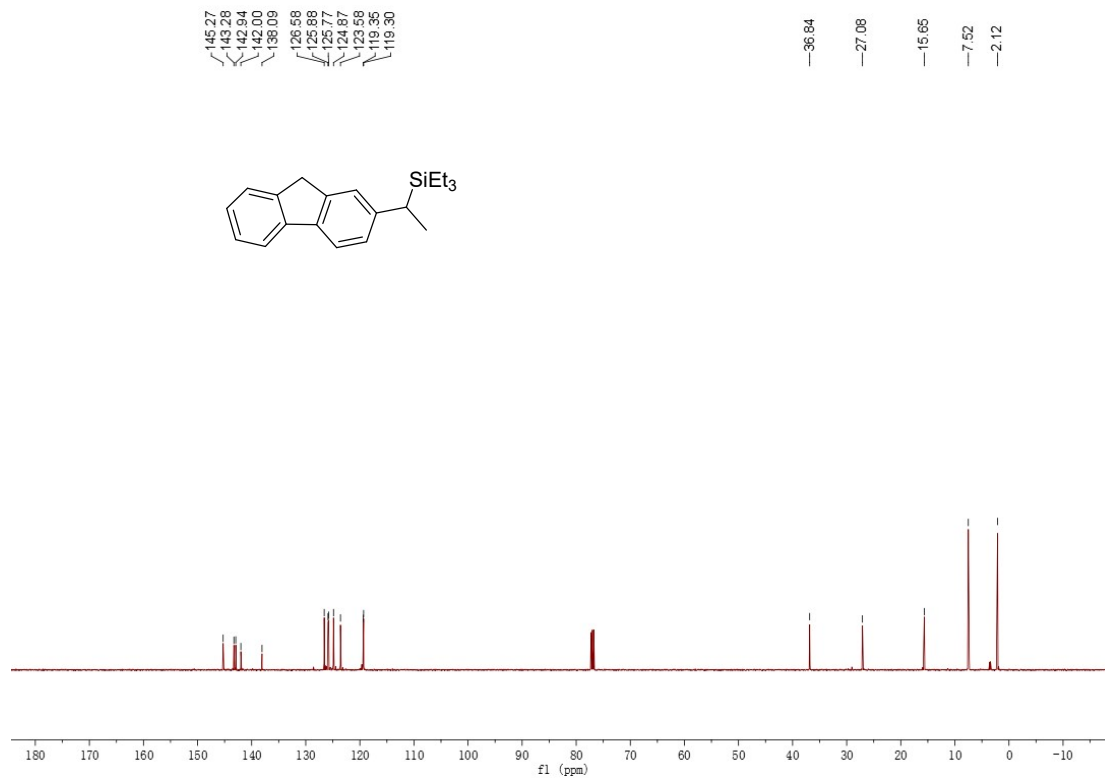

# 1-Ferrocenyl-1-(triethylsilyl)ethane (4l)

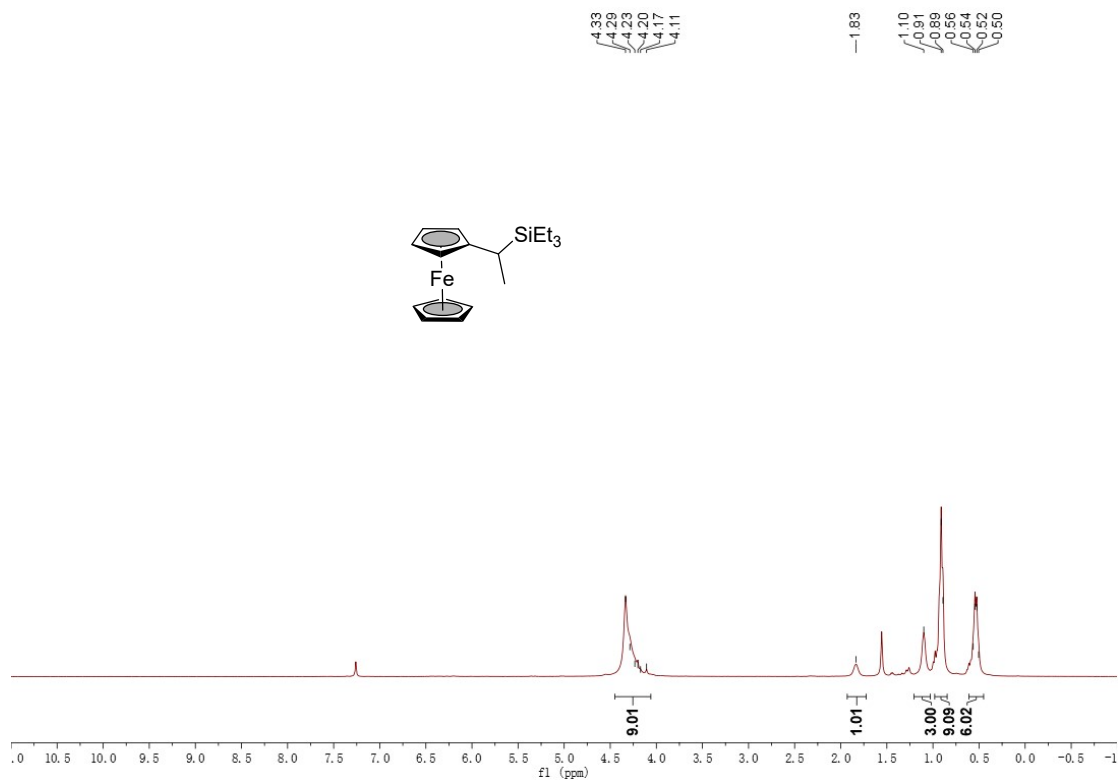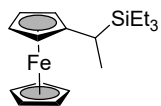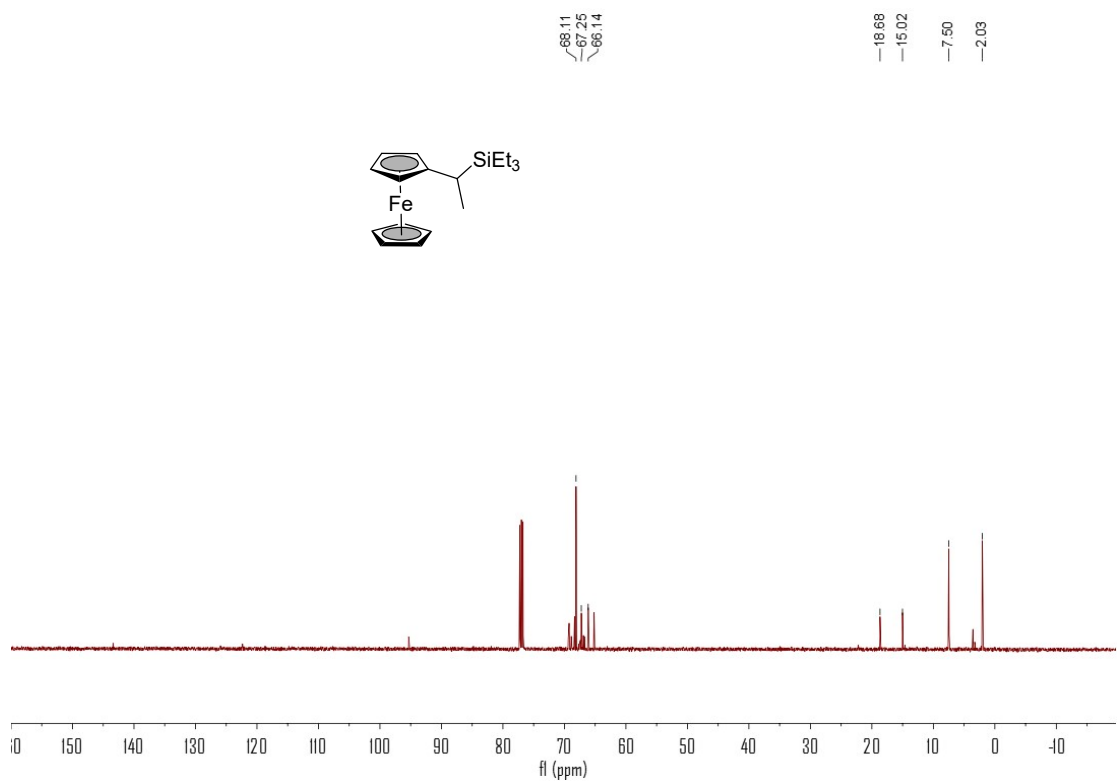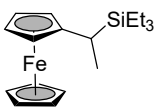

# 1-(4-(1-(triethylsilyl)ethyl)phenyl)-1H-pyrrole (4m)

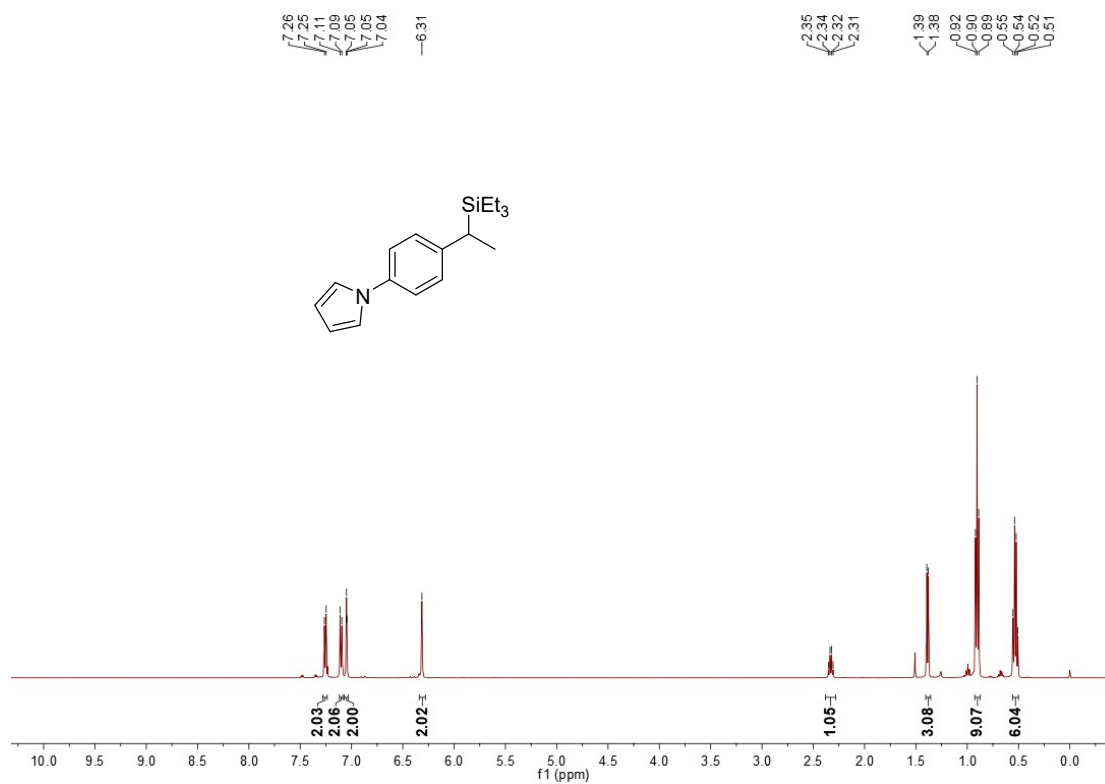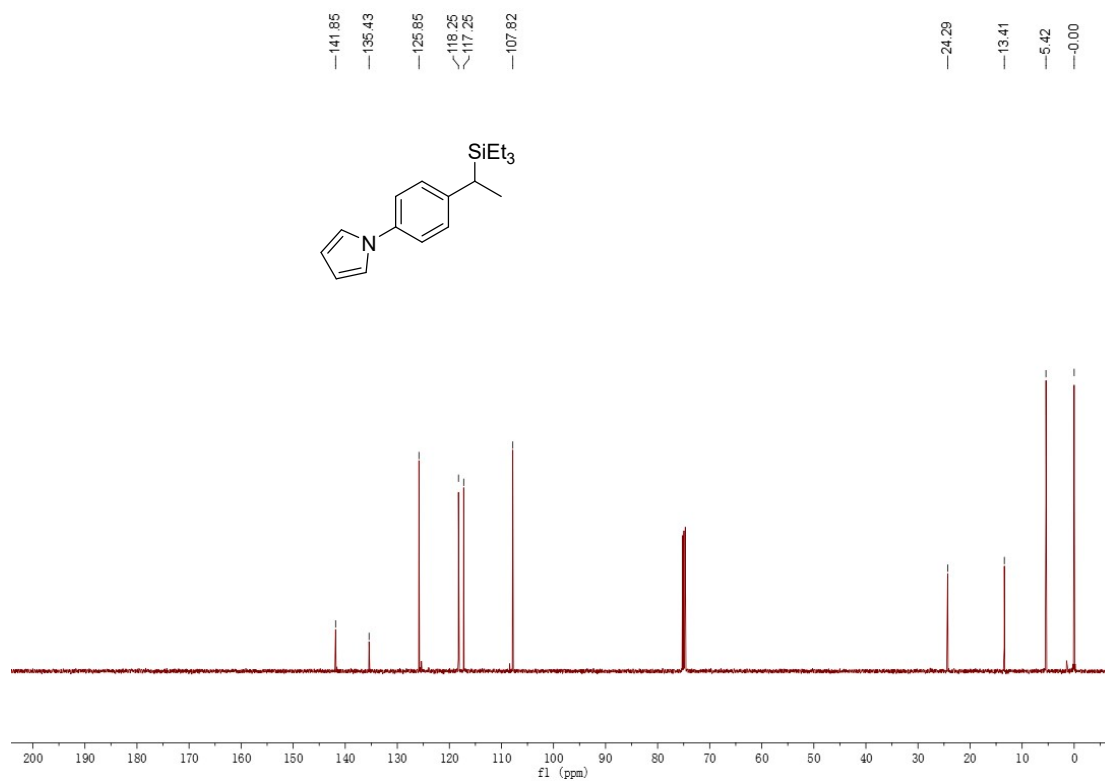

# Triethyl(1-(2-methyl-5-phenylfuran-3-yl)ethyl)silane (4n)

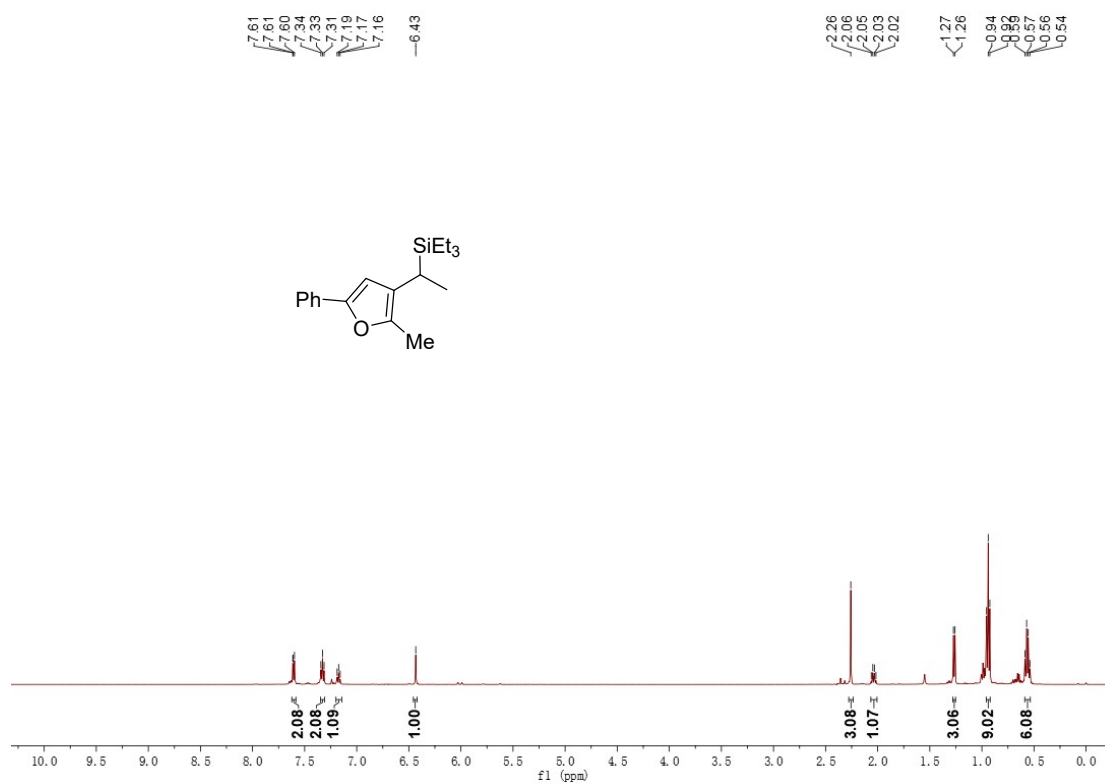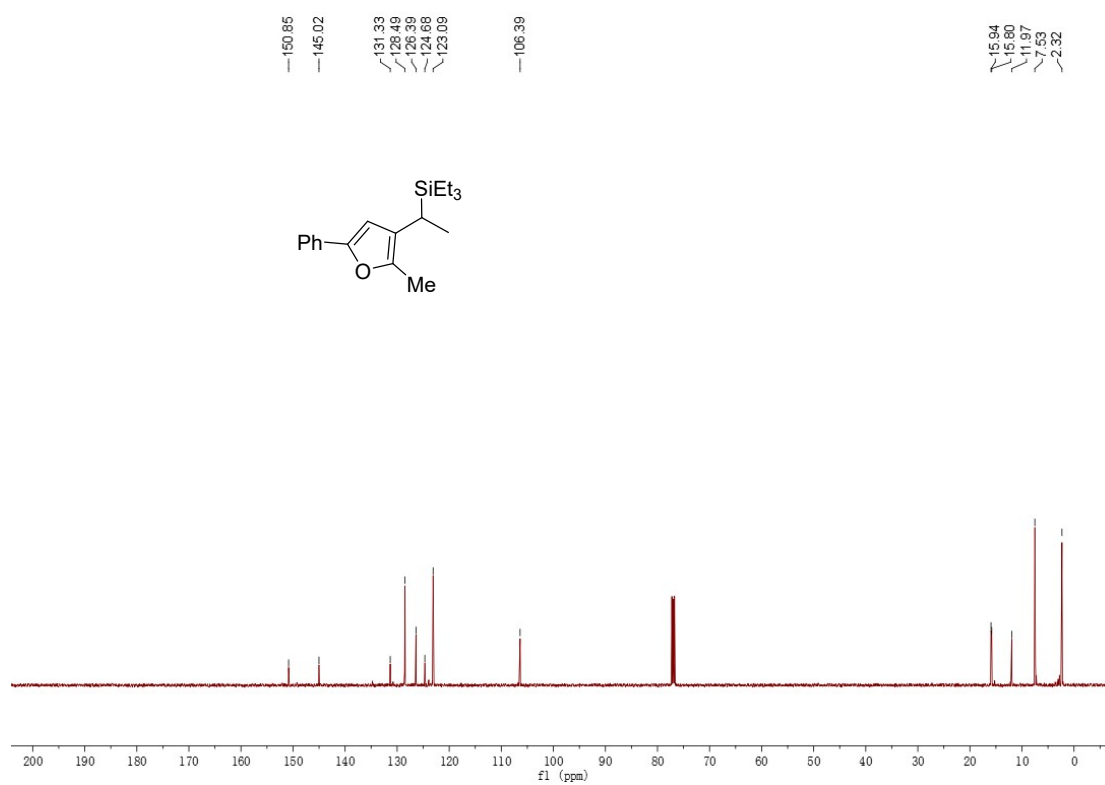

# Triethyl(1-phenylbutyl)silane (4o)

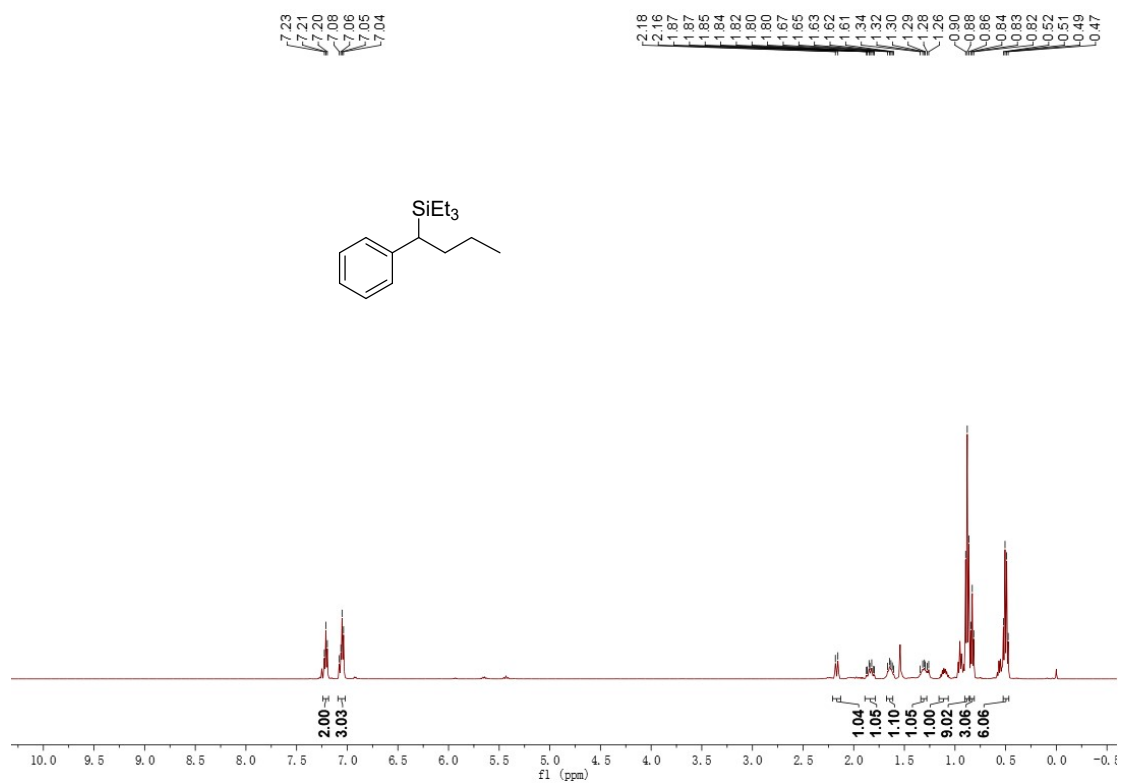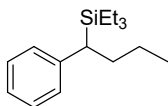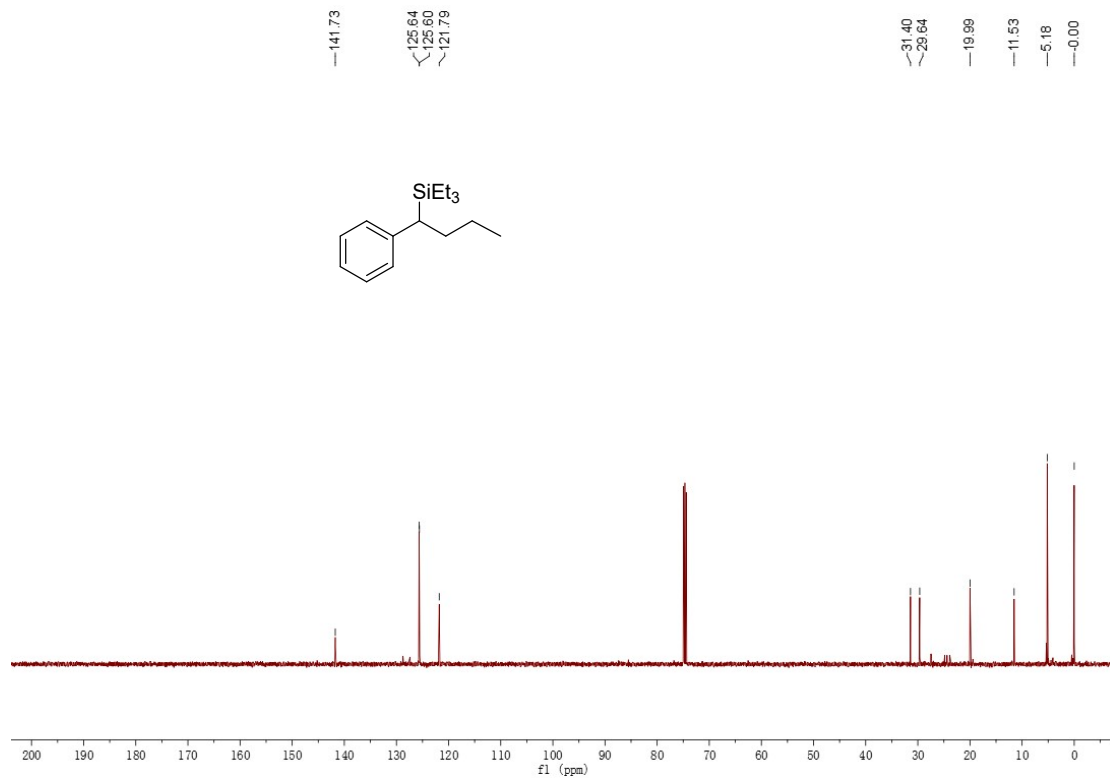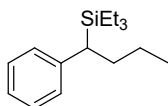



# Triethyl(1-phenylhexyl)silane (4p)

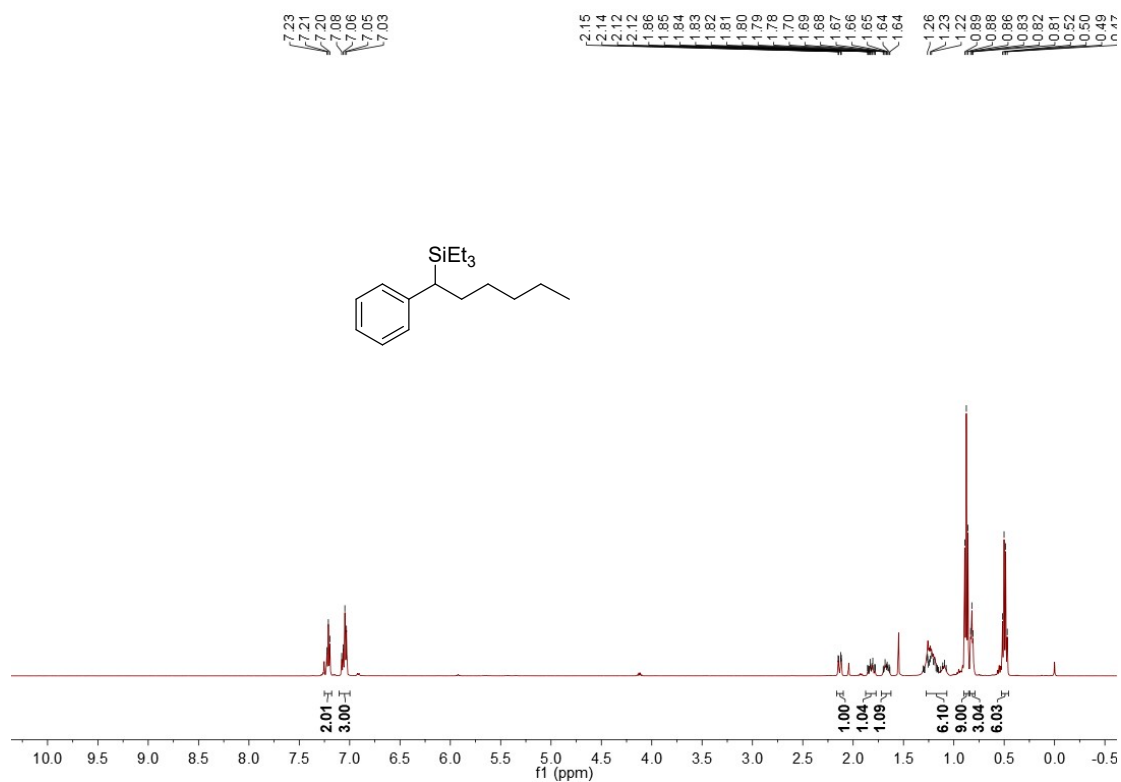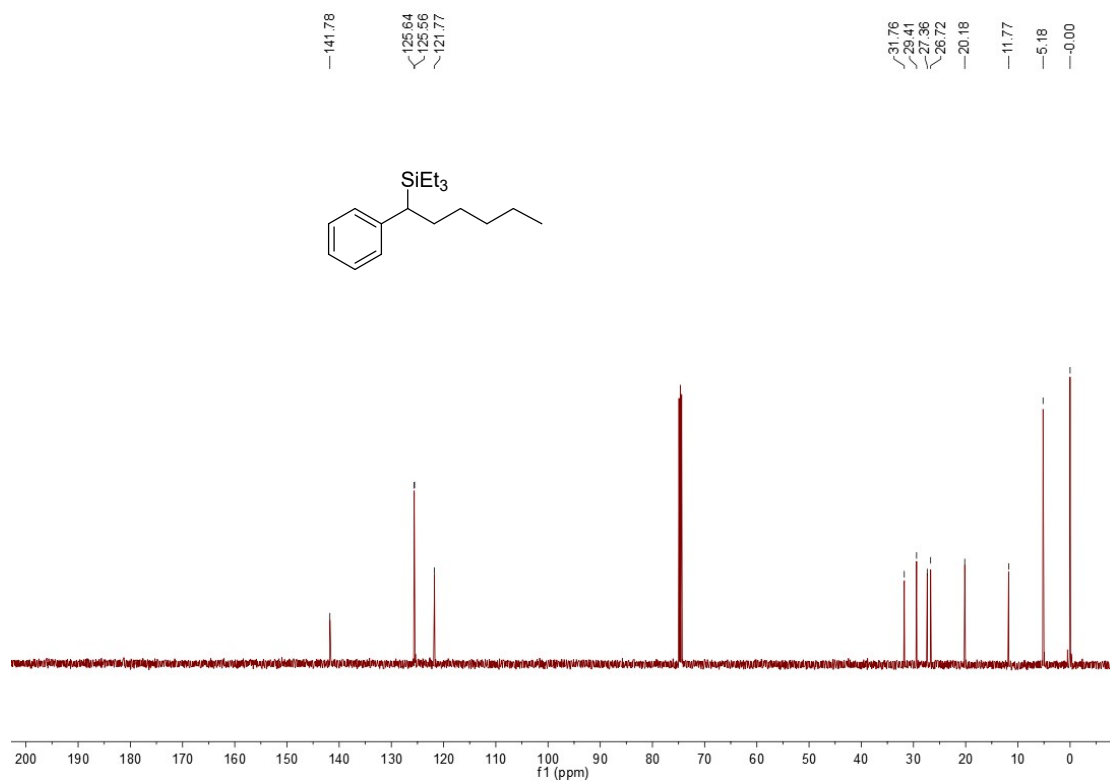

# Triethyl(1-phenyldodecyl)silane (4q)

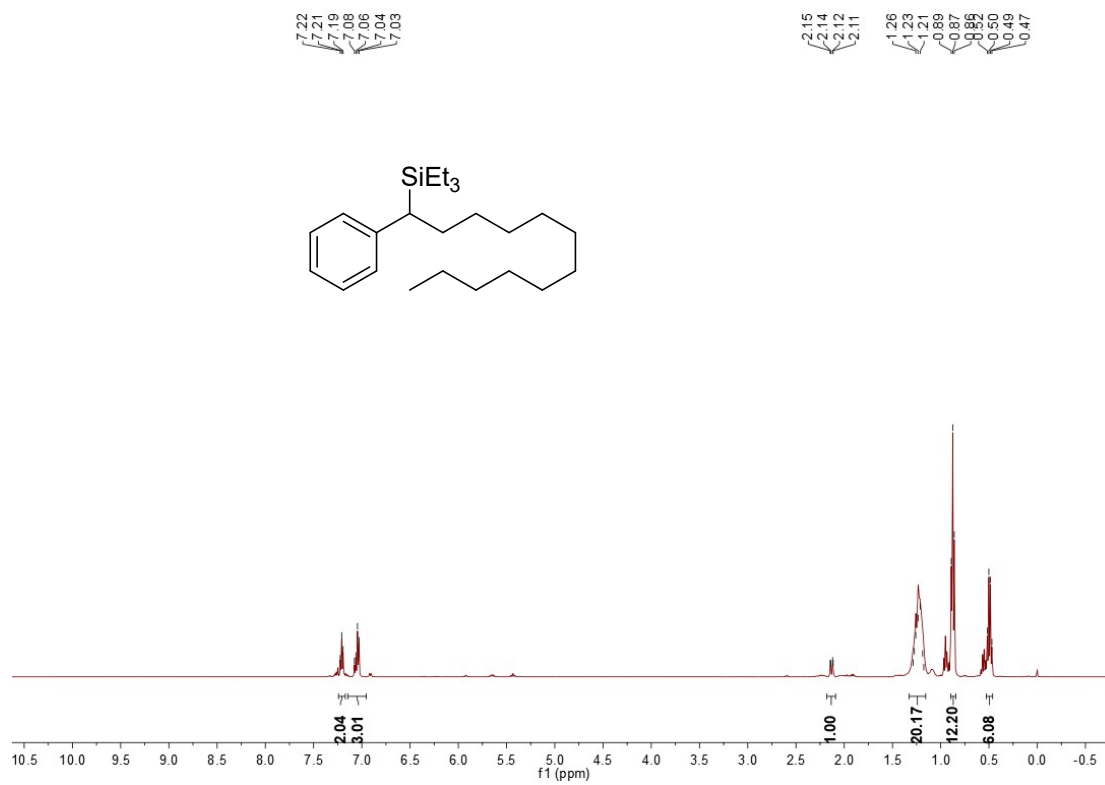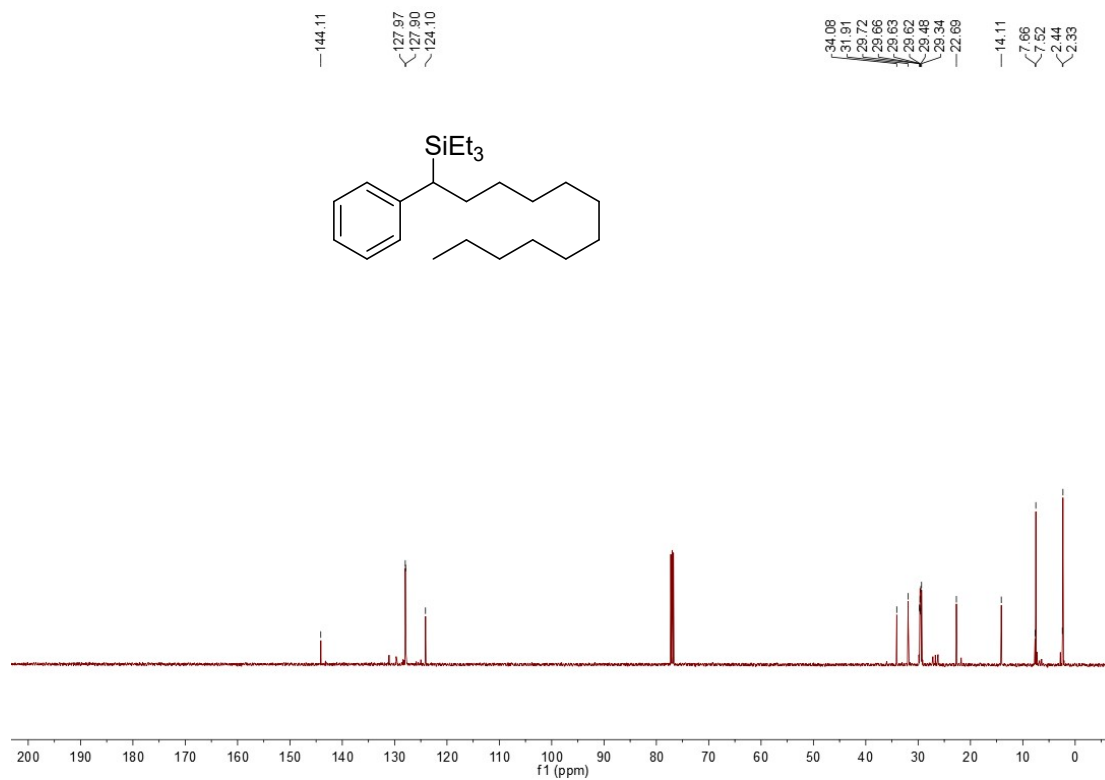

# N,N-dimethyl-4-((6-phenyl-6-(triethylsilyl)hexyl)oxy)aniline (4r)

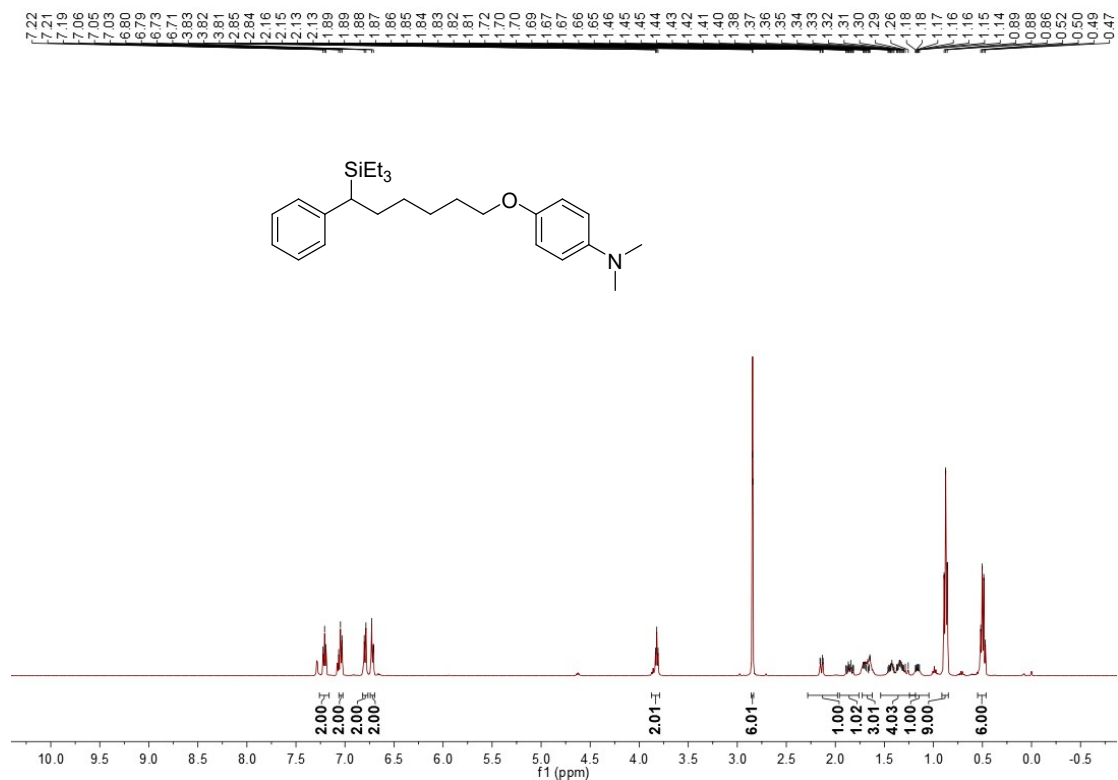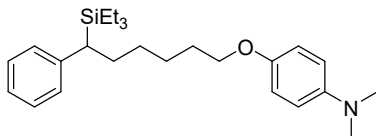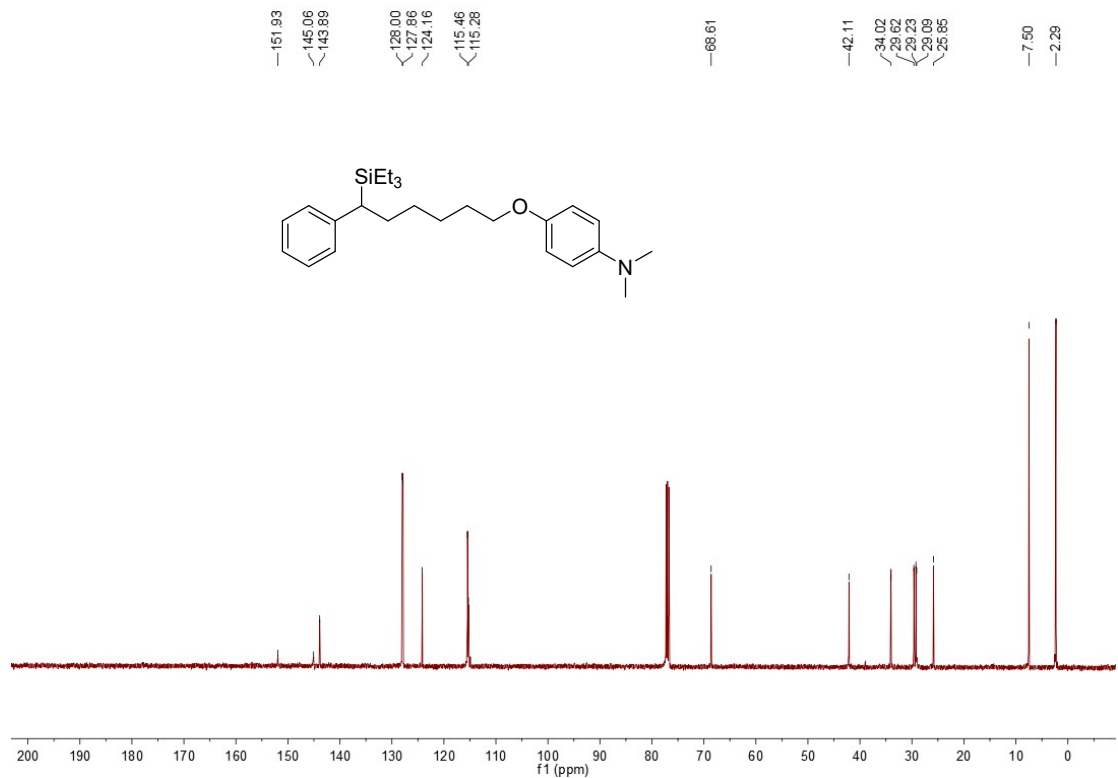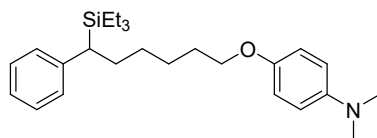

# Tert-butyldimethyl((6-phenyl-6-(triethylsilyl)hexyl)oxy)silane (4s)

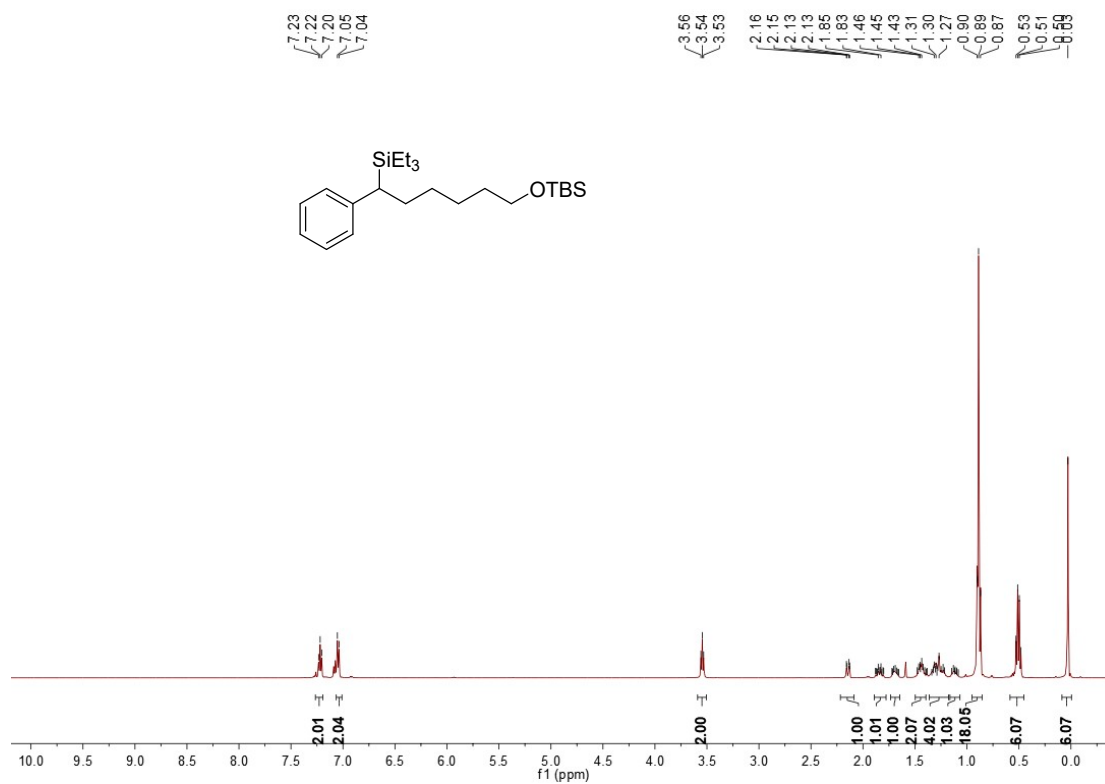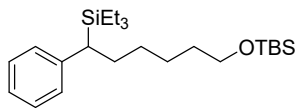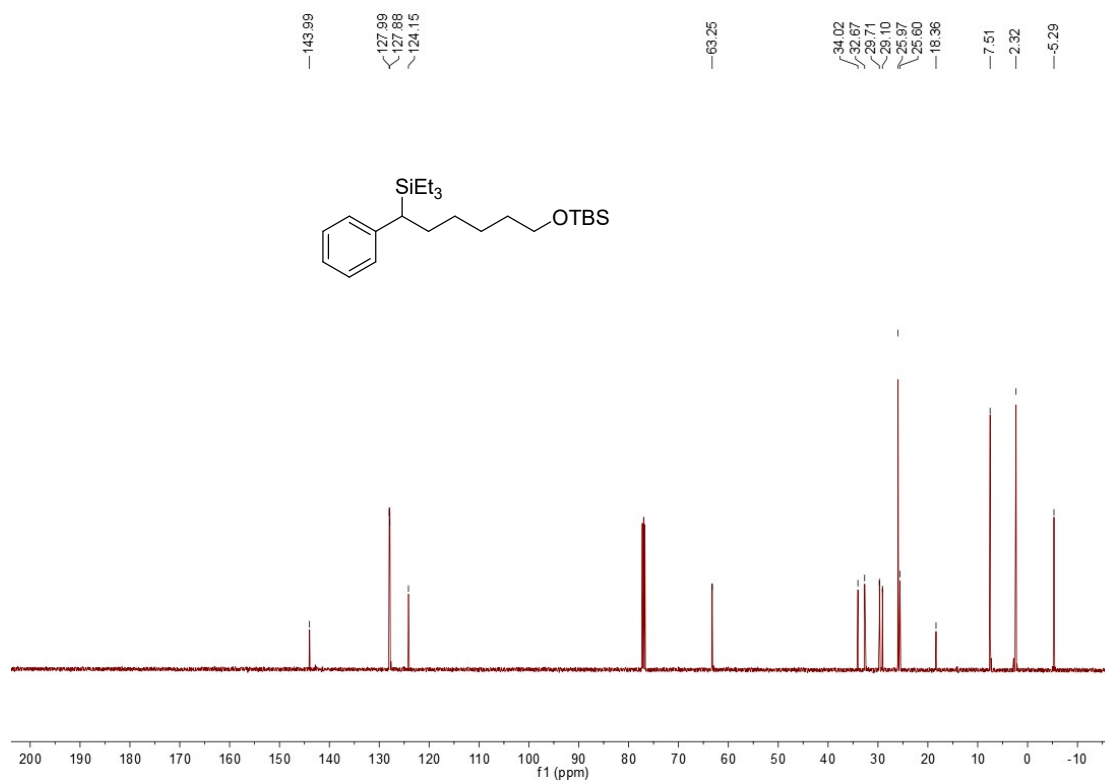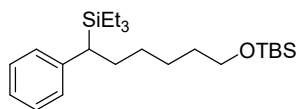

# (1,3-diphenylpentyl)triethylsilane (4t)

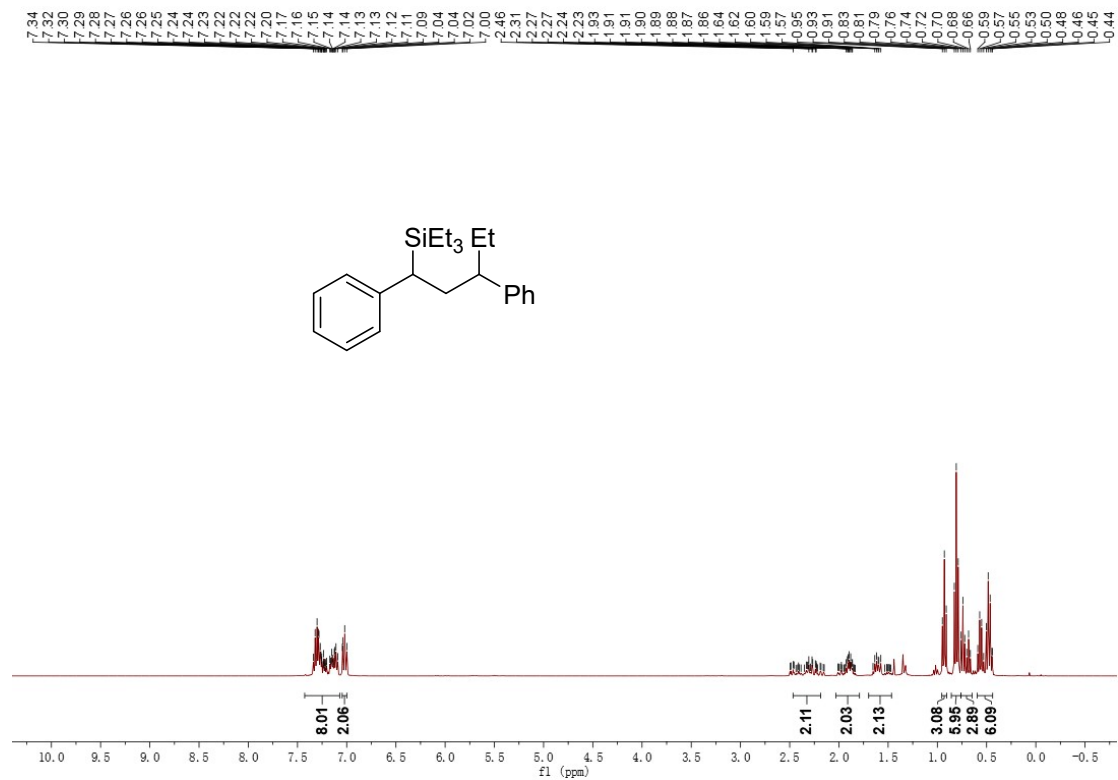

146.74  
145.03  
143.70

28.18  
28.12  
27.64  
25.89  
24.25

-46.05

-36.64

-31.25

-30.46

12.30

7.39

2.27

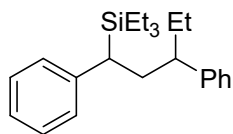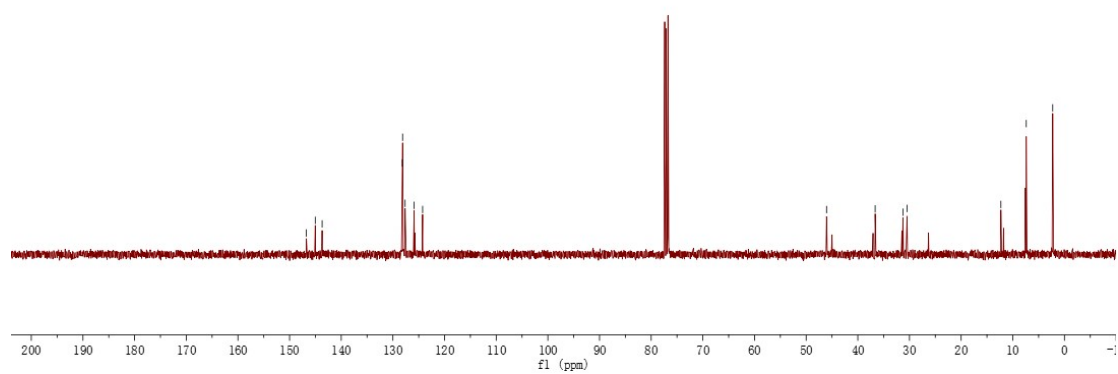

(cyclohexyl(phenyl)methyl)triethylsilane (4u)

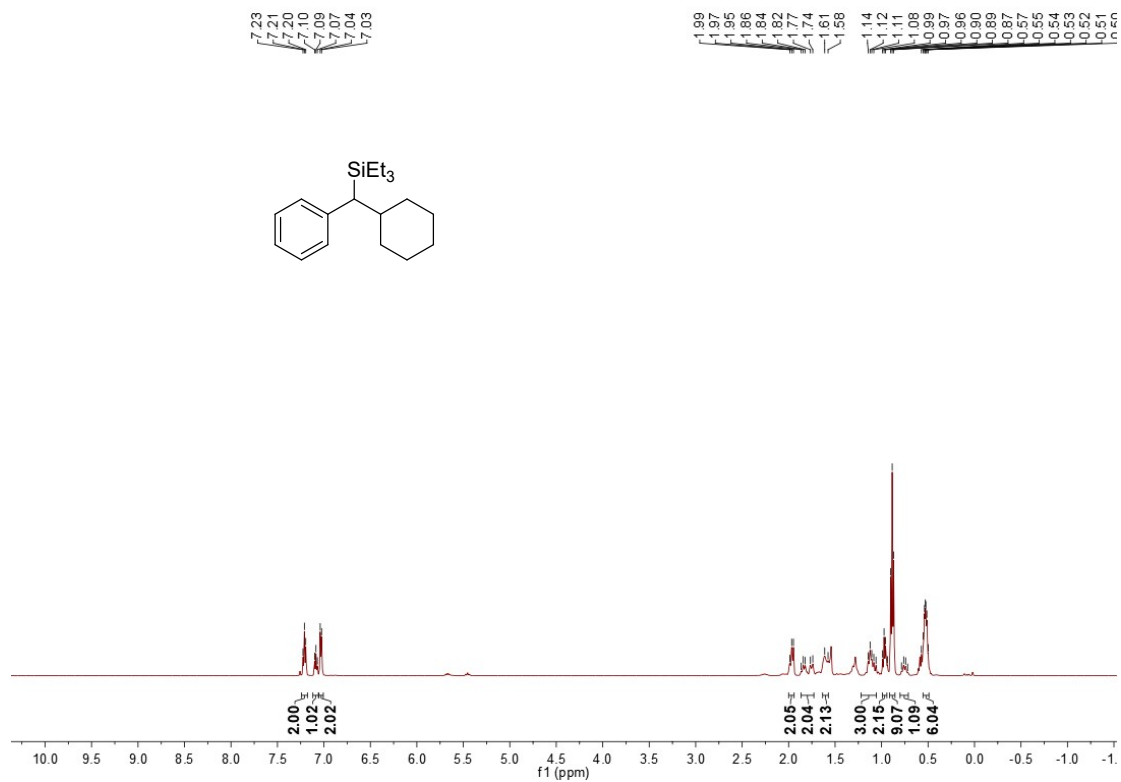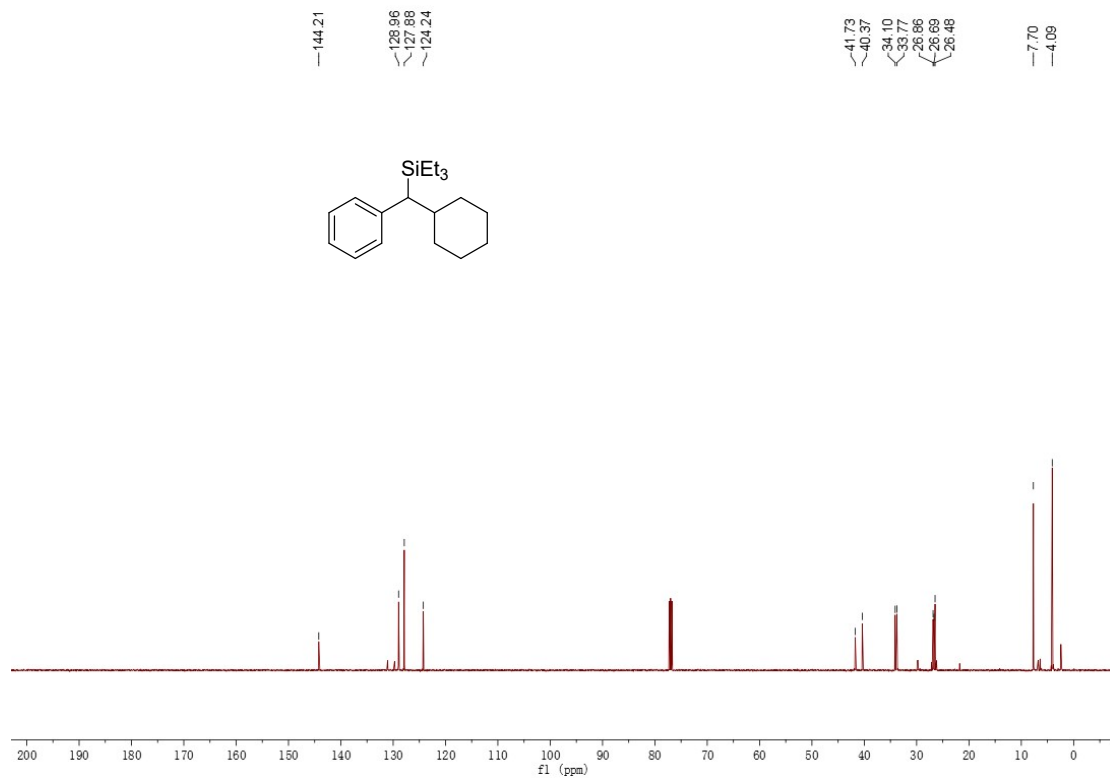

# (2,3-dihydro-1H-inden-1-yl)triethylsilane (4v)

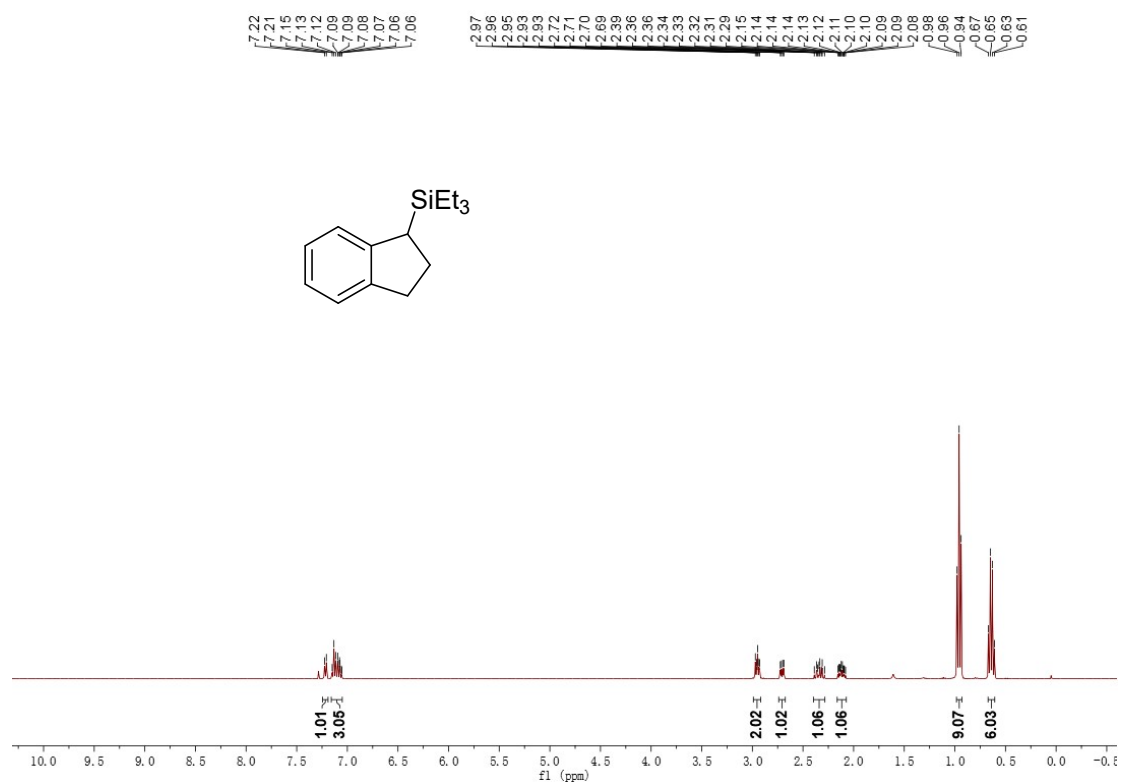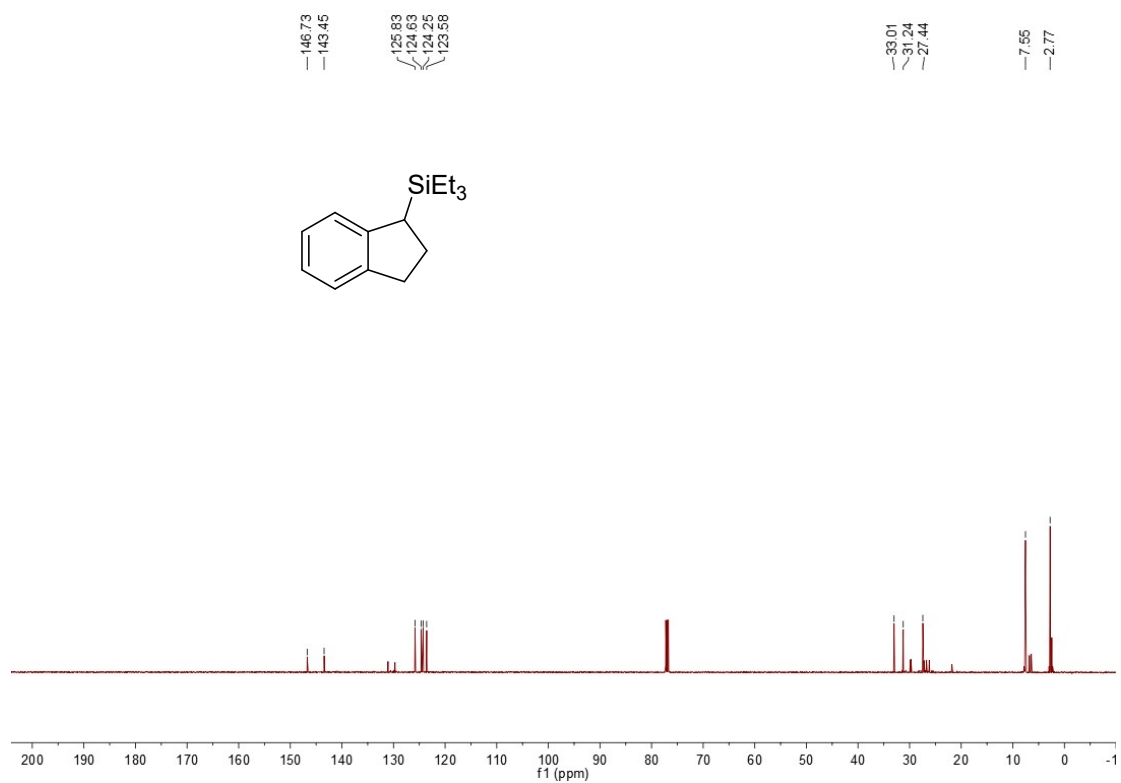

**Triethyl(1-(3,5,5,6,8,8-hexamethyl-5,6,7,8-tetrahydronaphthalen-2-yl)ethyl)silane  
(4aa)**

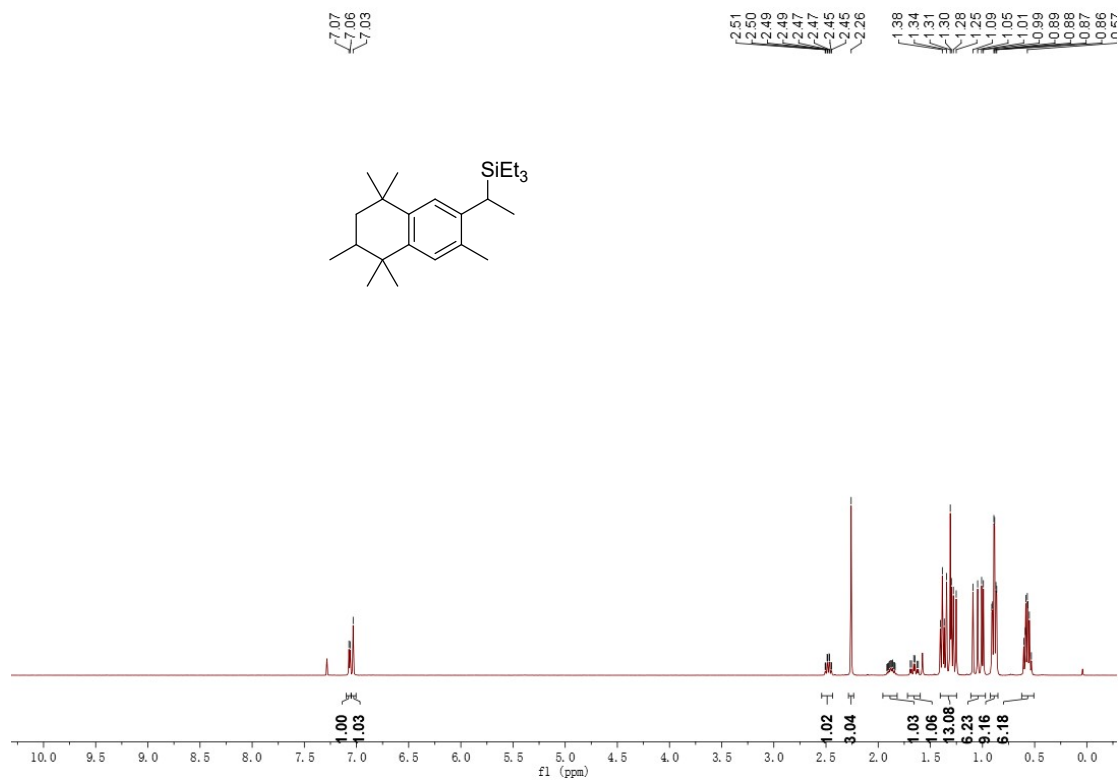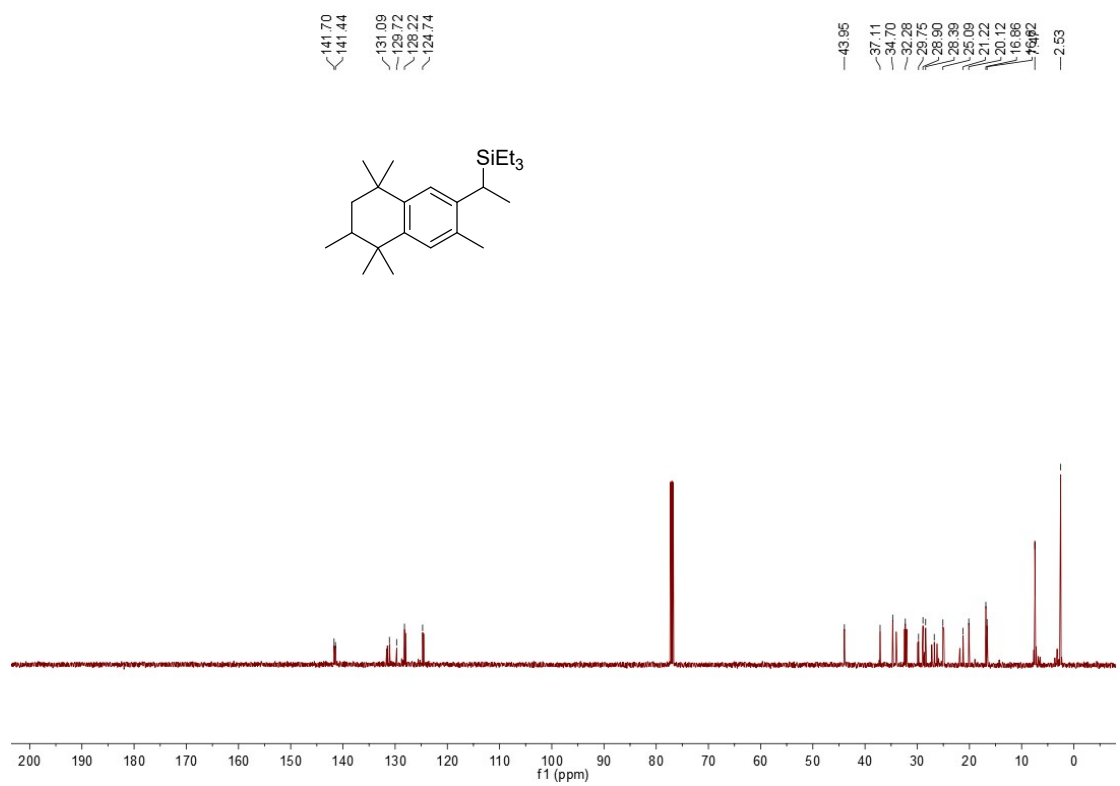



**(1-(4-((3,7-dimethyloct-6-en-1-yl)oxy)phenyl)ethyl)triethylsilane (4ab)**

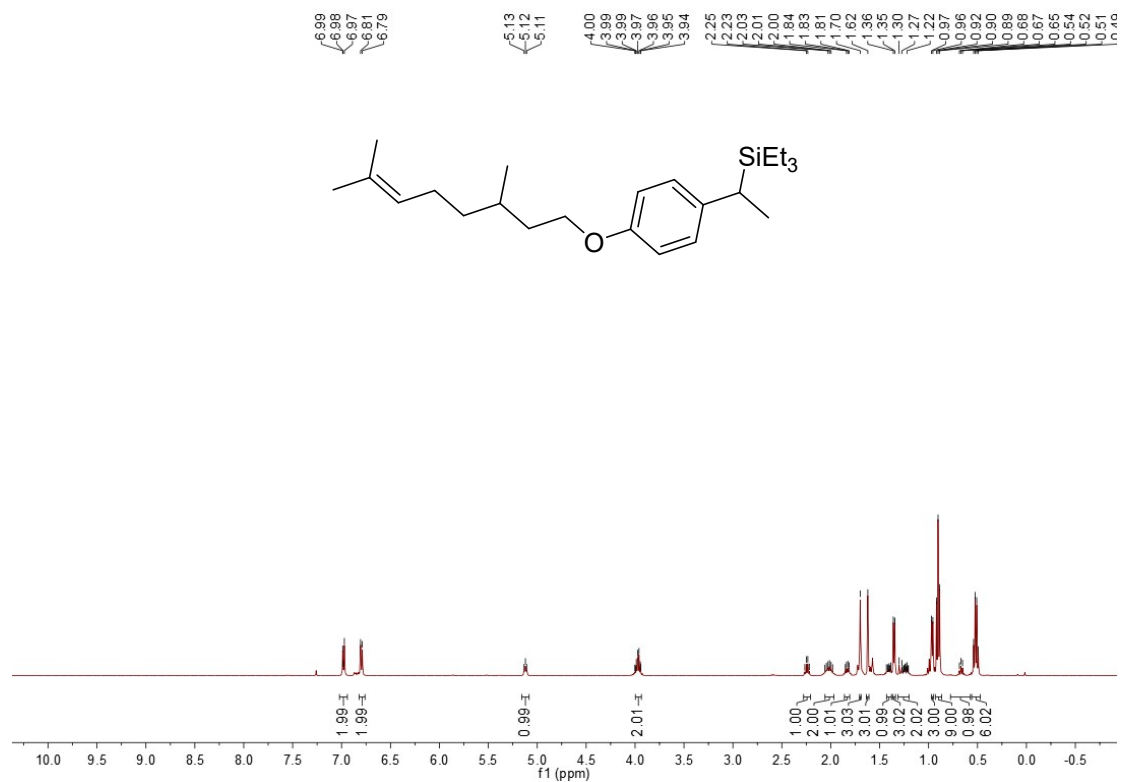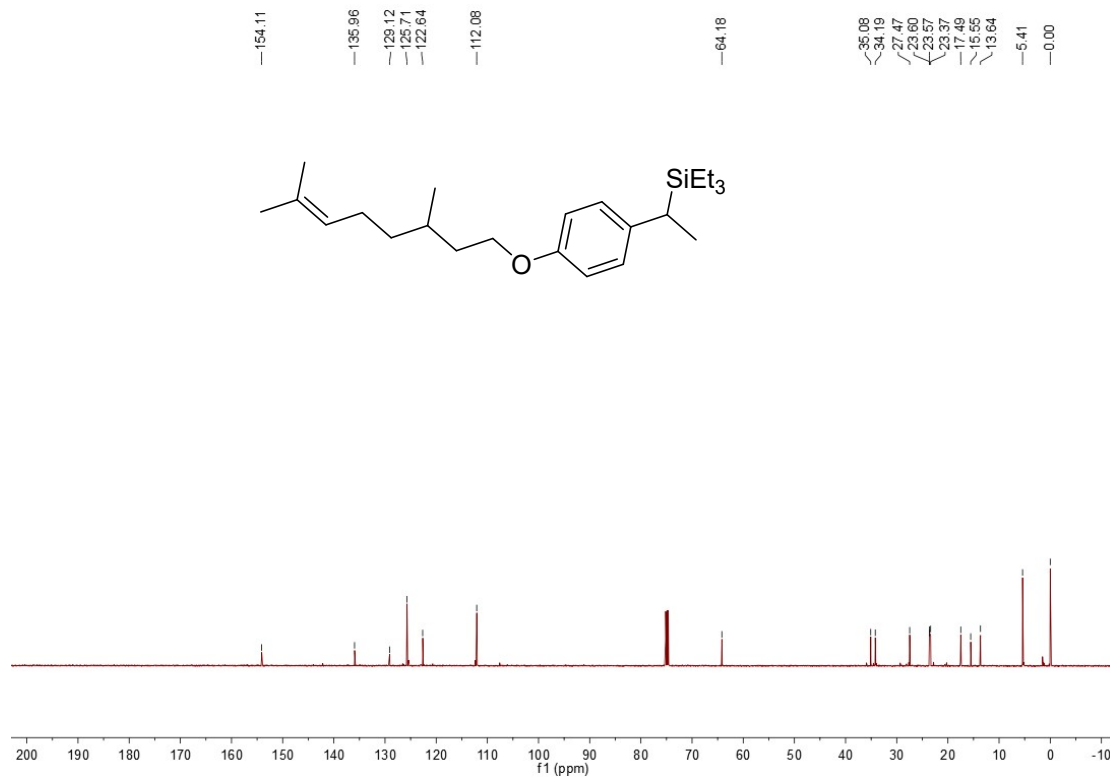

**(1R,2S,5R)-2-isopropyl-5-methylcyclohexyl 4-(1-(triethylsilyl)ethyl)benzoate (4c)**

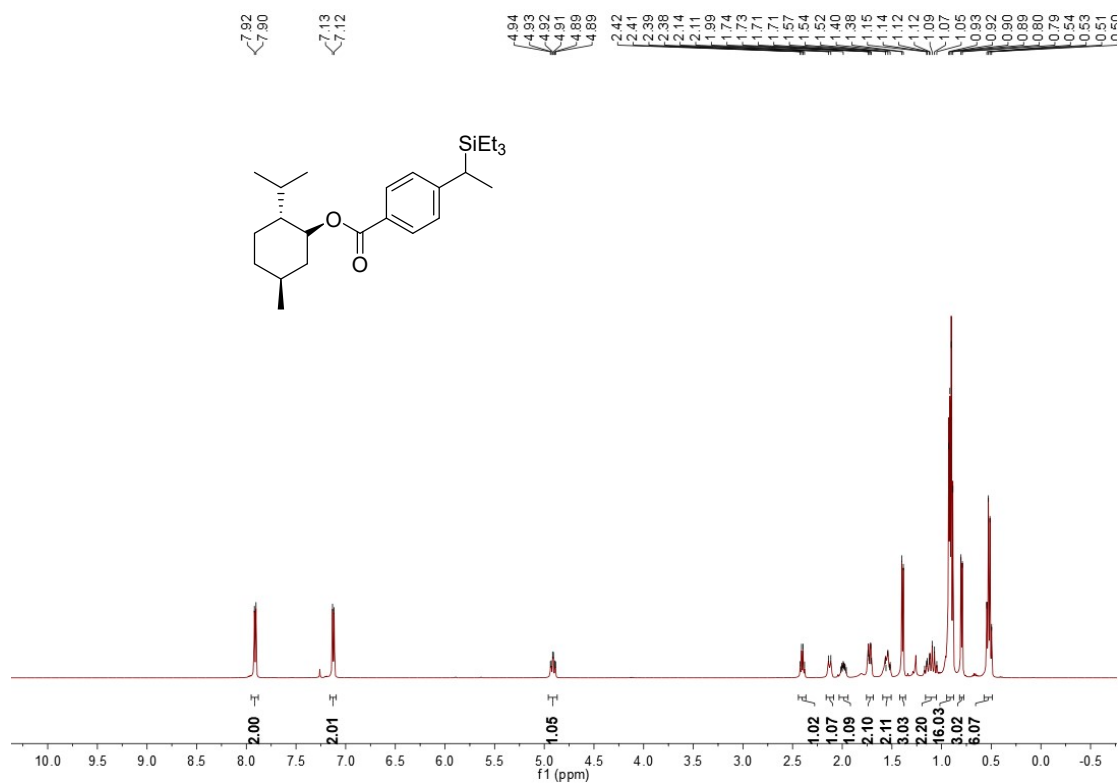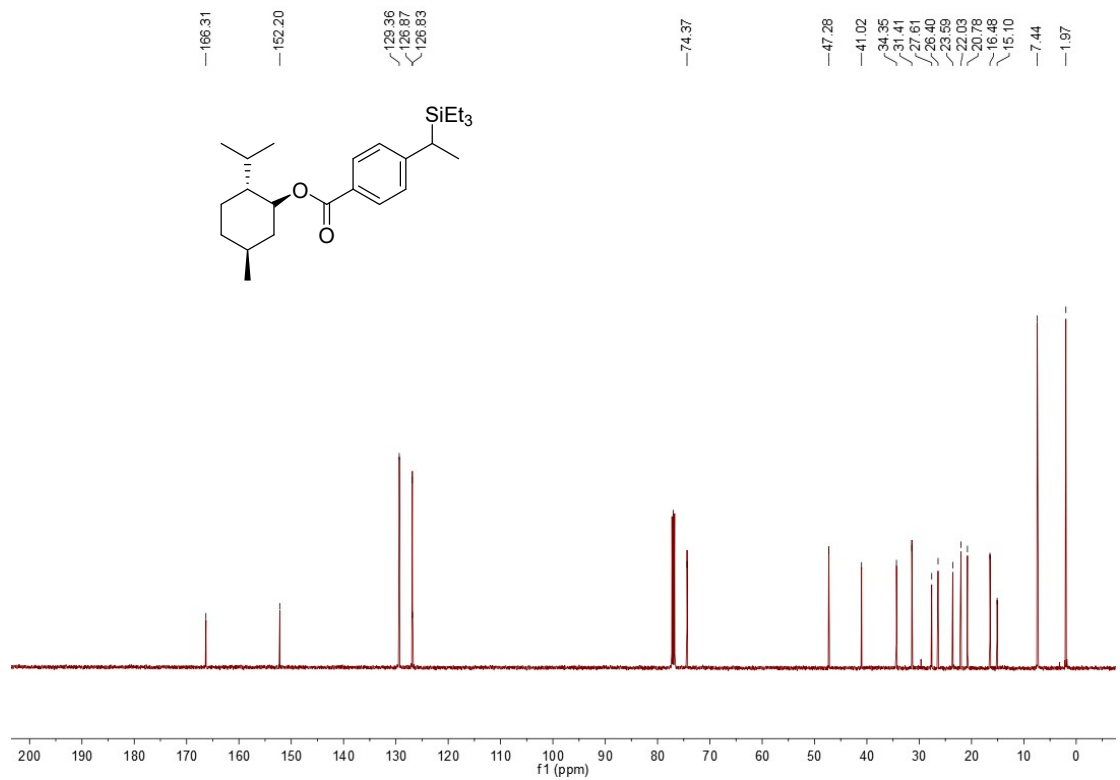

**(1S,2R,4S)-1,7,7-trimethylbicyclo[2.2.1]heptan-2-yl 4-(1-(triethylsilyl)ethyl)benzoate (4ad)**

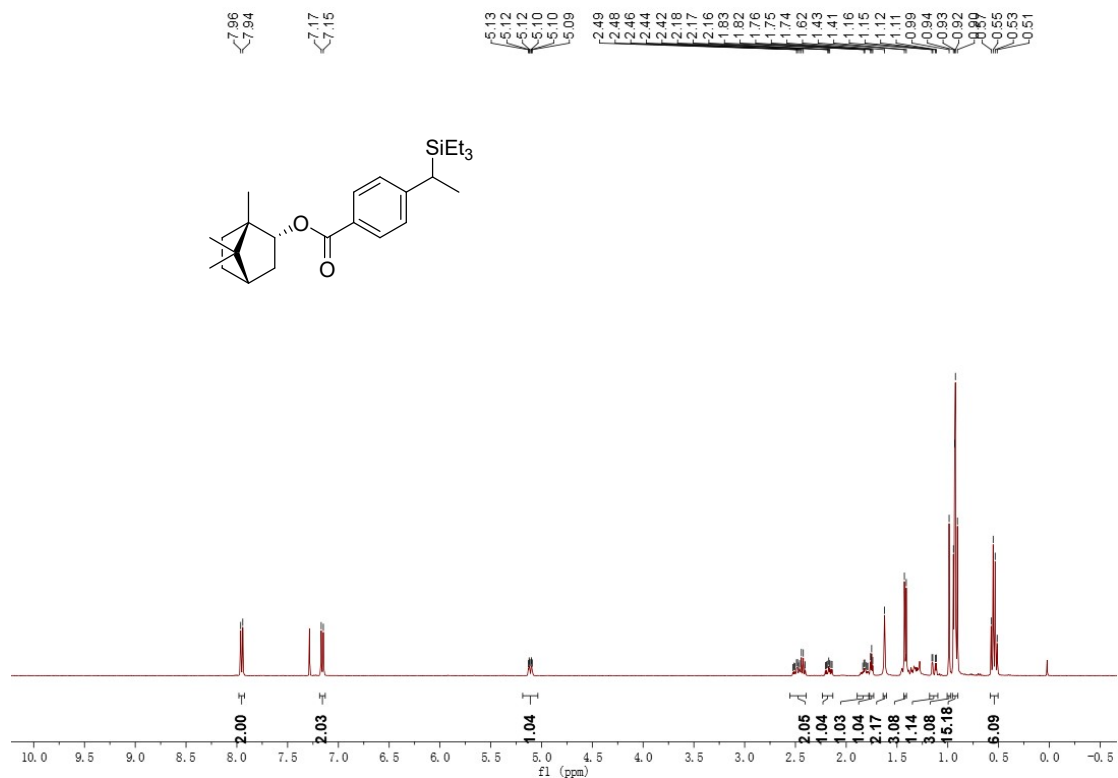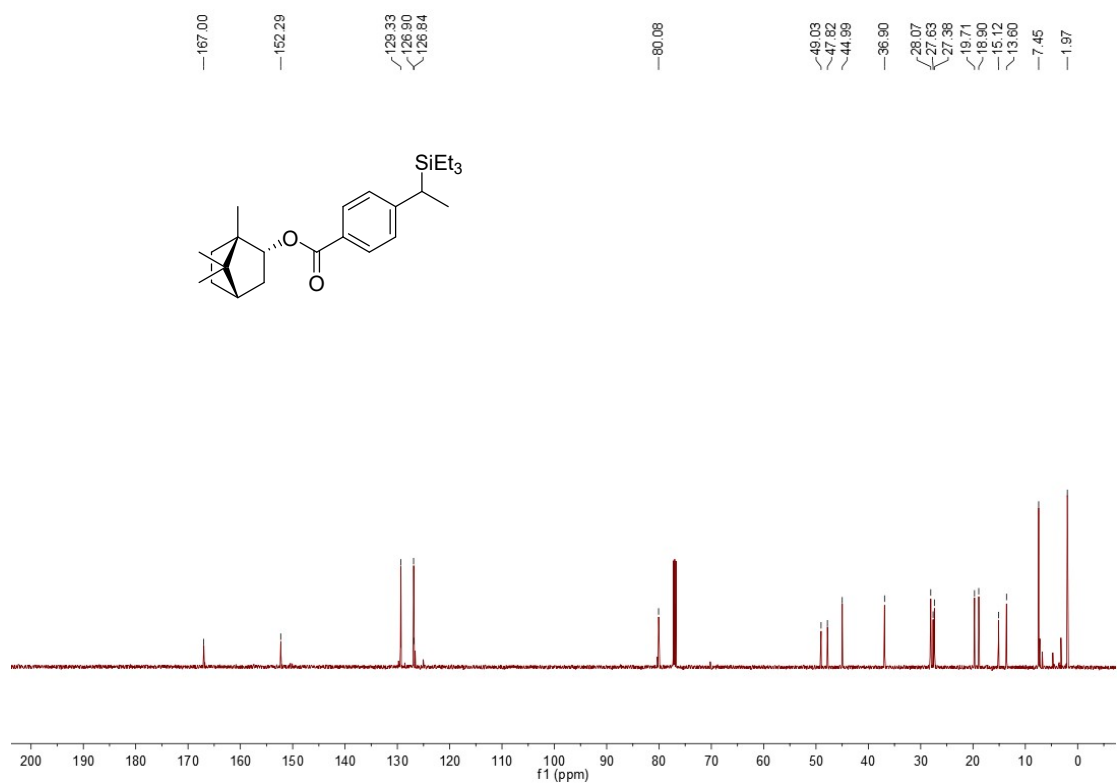

**(3aS,5S,6R,6aS)-5-((R)-2,2-dimethyl-1,3-dioxolan-4-yl)-2,2-dimethyltetrahydrofuro[2,3-d][1,3]dioxol-6-yl 4-(1-(triethylsilyl)ethyl)benzoate**  
**(4ae)**

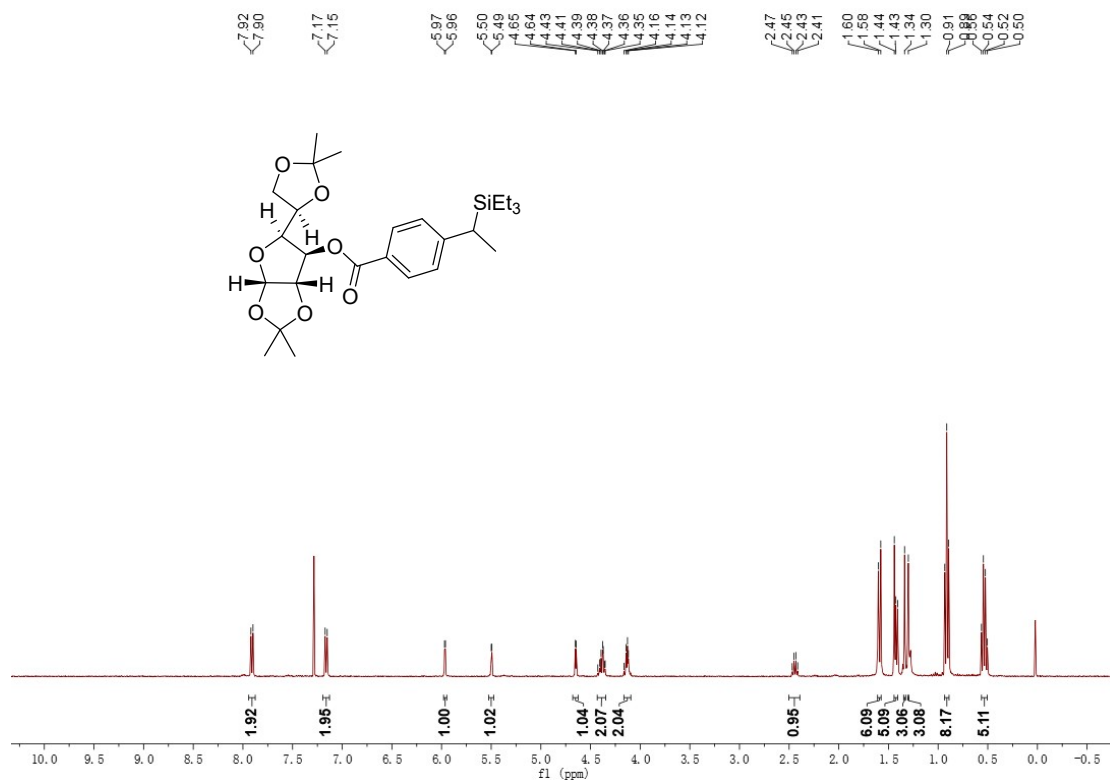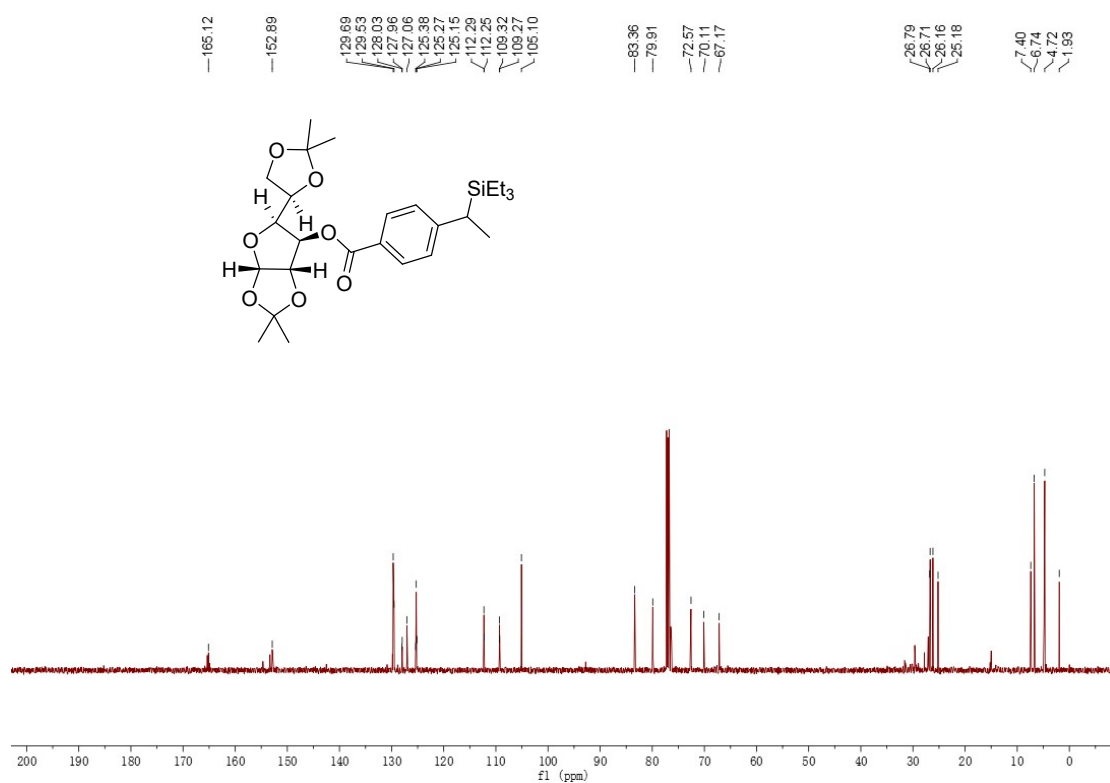

**(3S,8S,9S,10R,13R,14S,17R)-10,13-dimethyl-17-((R)-6-methylheptan-2-yl)-2,3,4,7,8,9,10,11,12,13,14,15,16,17-tetradecahydro-1H-cyclopenta[a]phenanthren-3-yl 4-(1-(triethylsilyl)ethyl)benzoate (4af)**

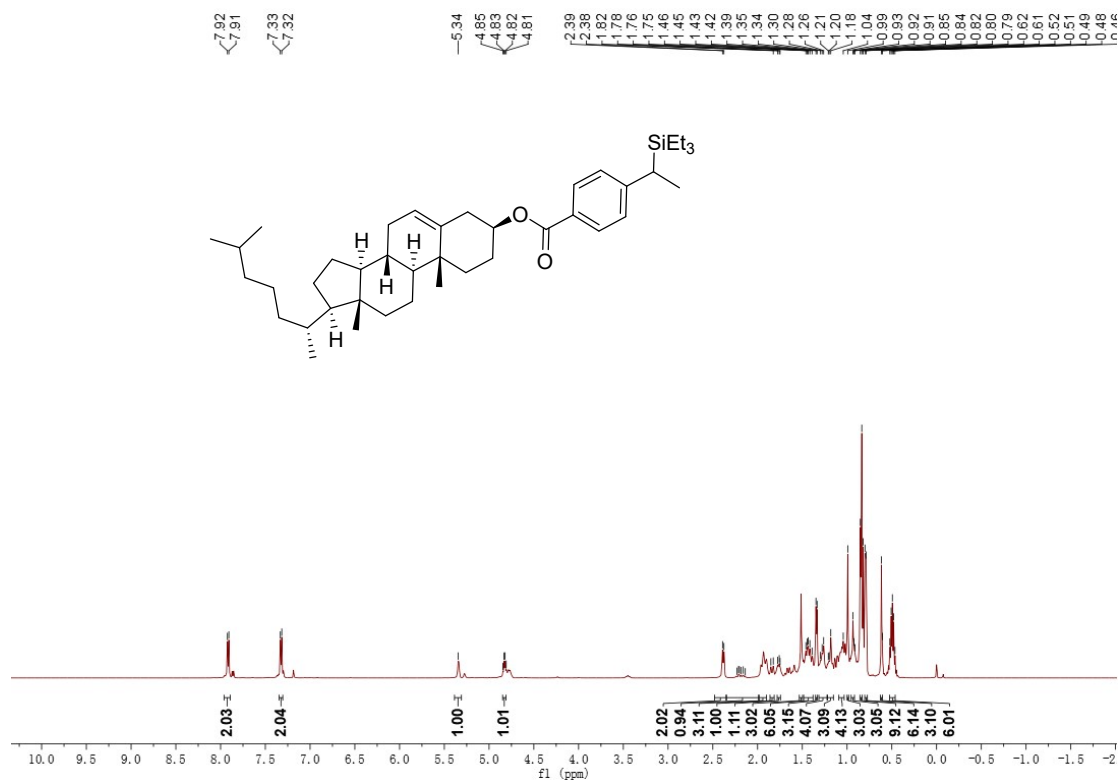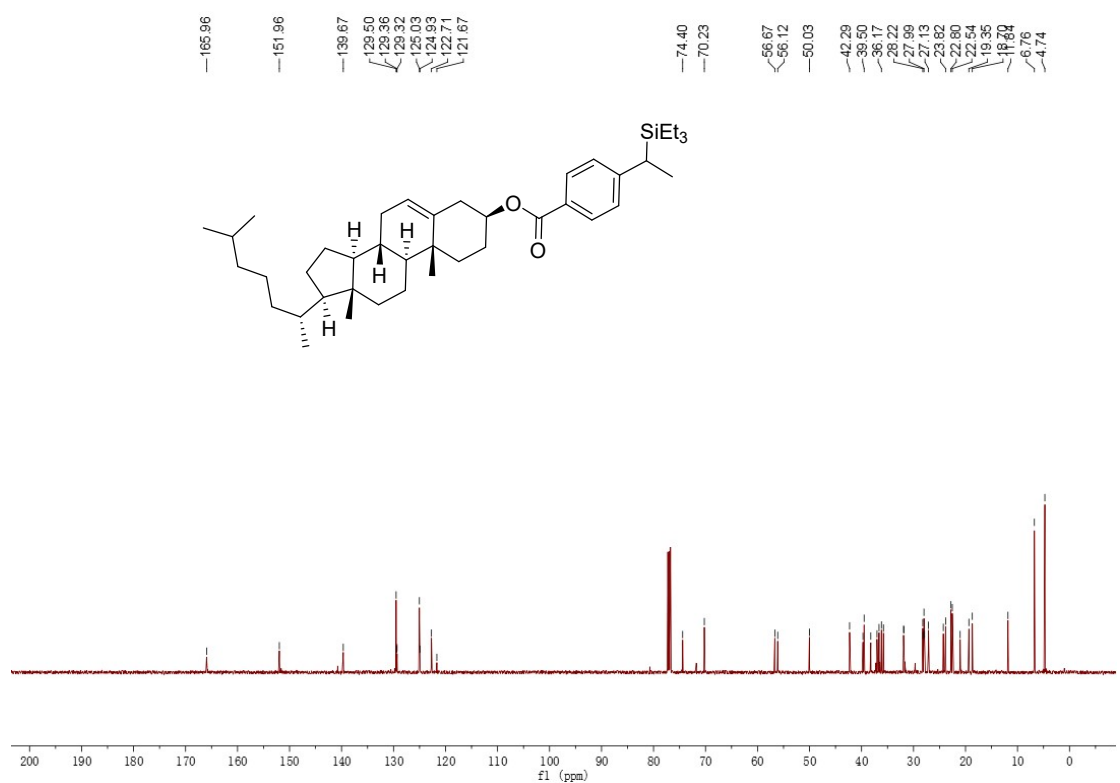

**(4S,5'R,6aR,6bS,8aS,8bR,9S,10R,11aS,12aS,12bS)-5',6a,8a,9-tetramethyl-1,3,3',4,4',5,5',6,6a,6b,6',7,8,8a,8b,9,11a,12,12a,12b-icosahydrospiro[naphtho[2',1':4,5]indeno[2,1-b]furan-10,2'-pyran]-4-yl 4-(1-(triethylsilyl)ethyl)benzoate (4ag)**

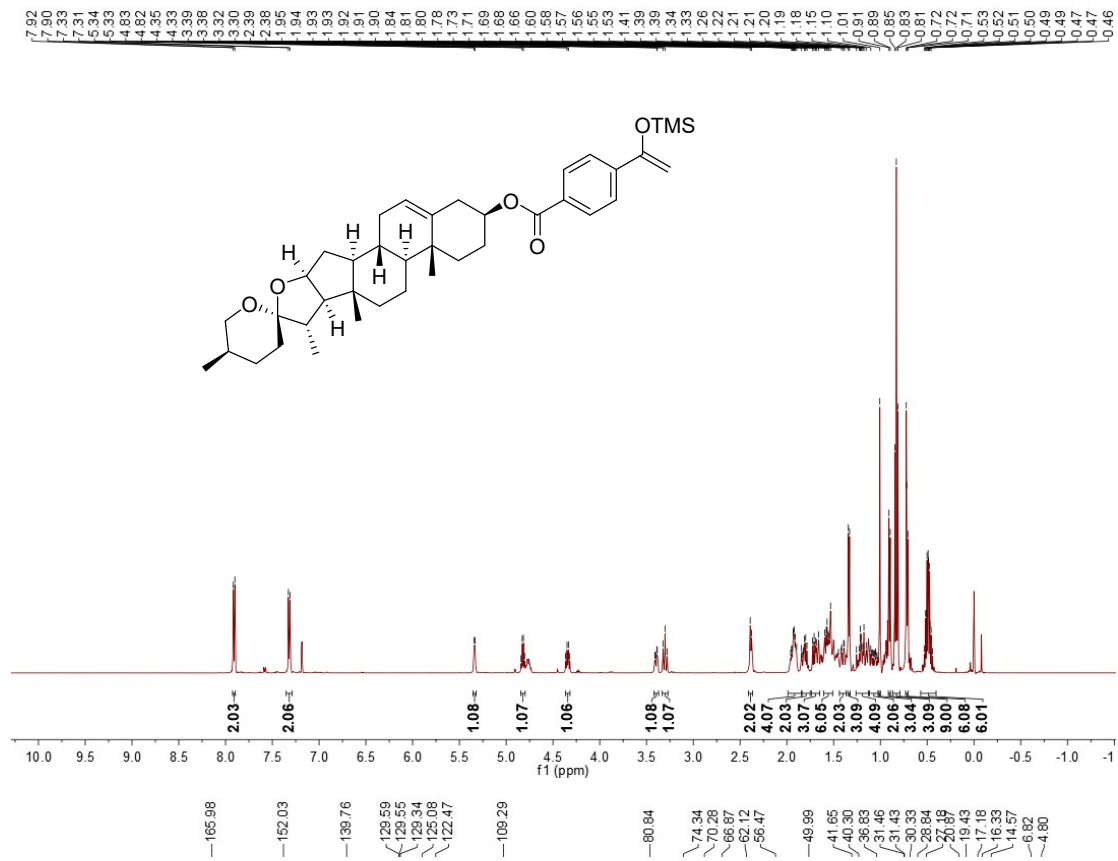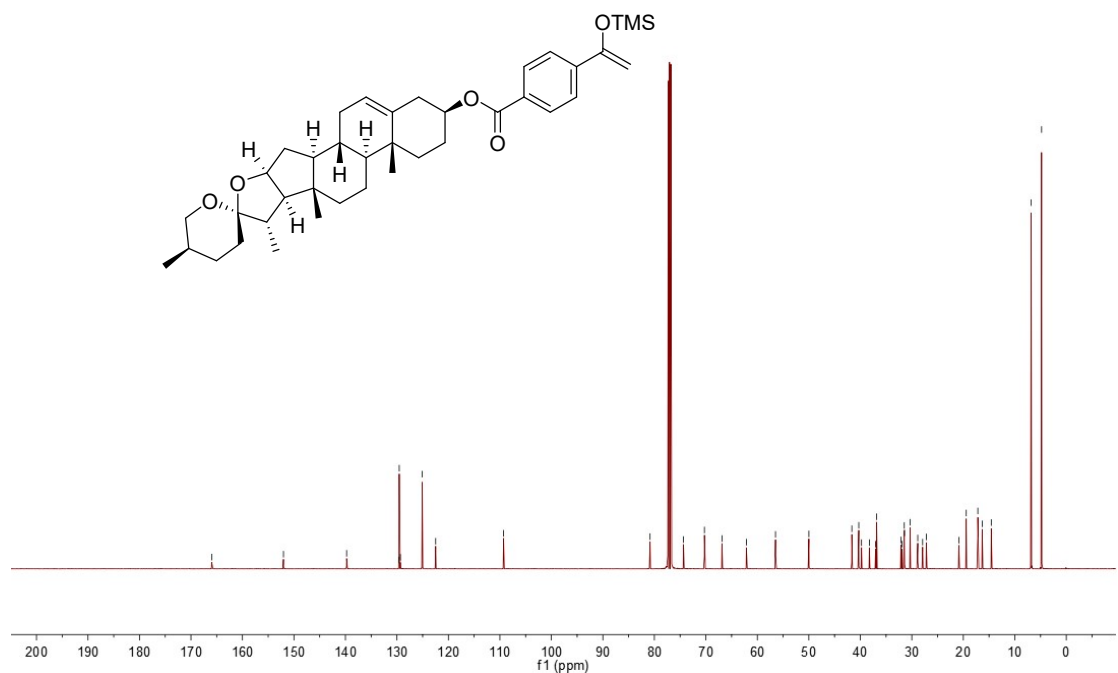

**(E)-triethyl(2-methylstyryl)silane (5a)**

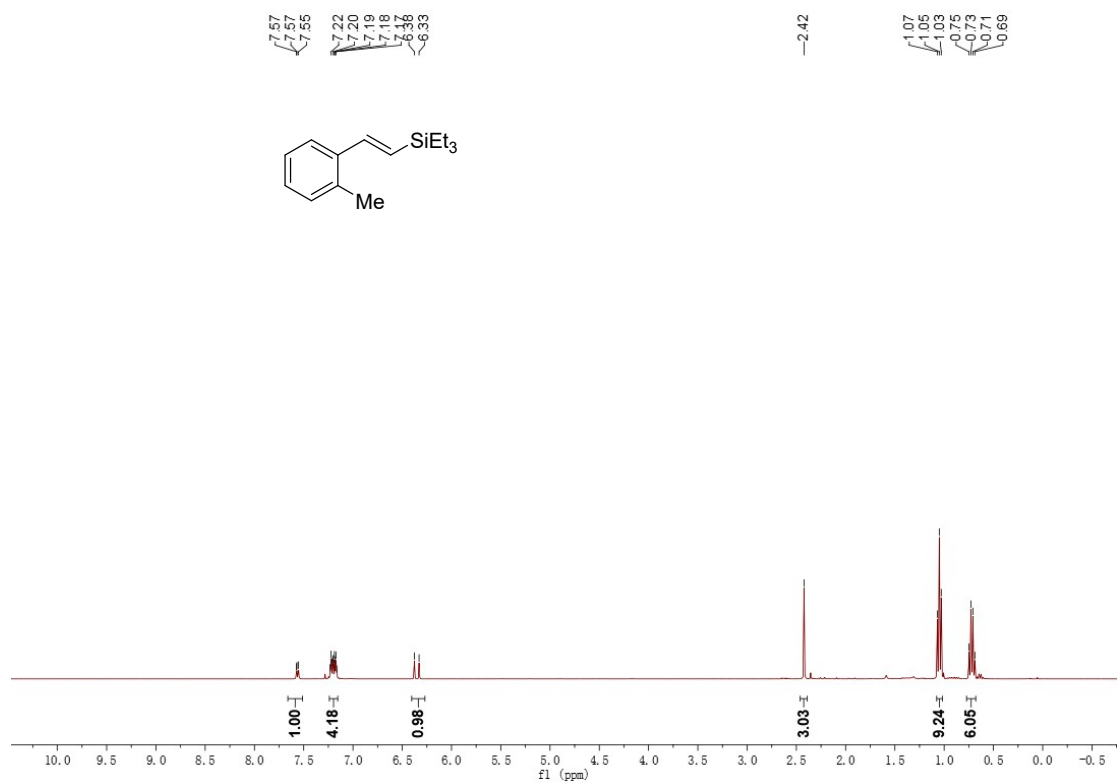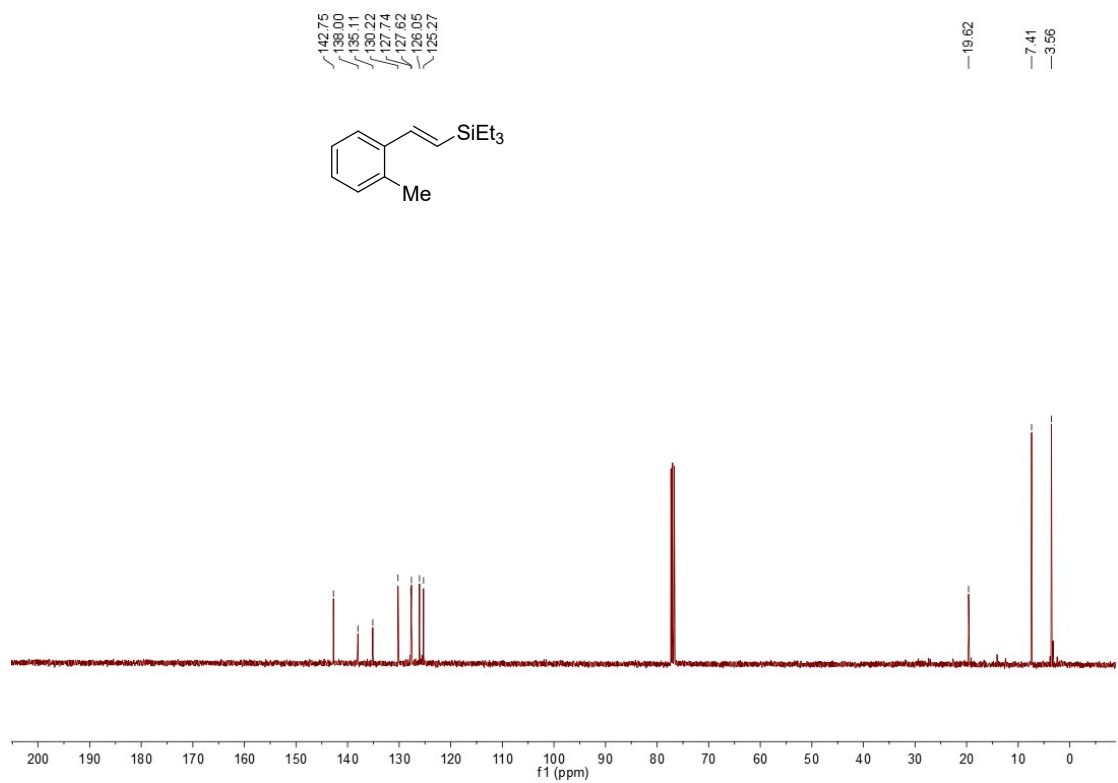

# (E)-triethyl(2-(trifluoromethyl)styryl)silane (5b)

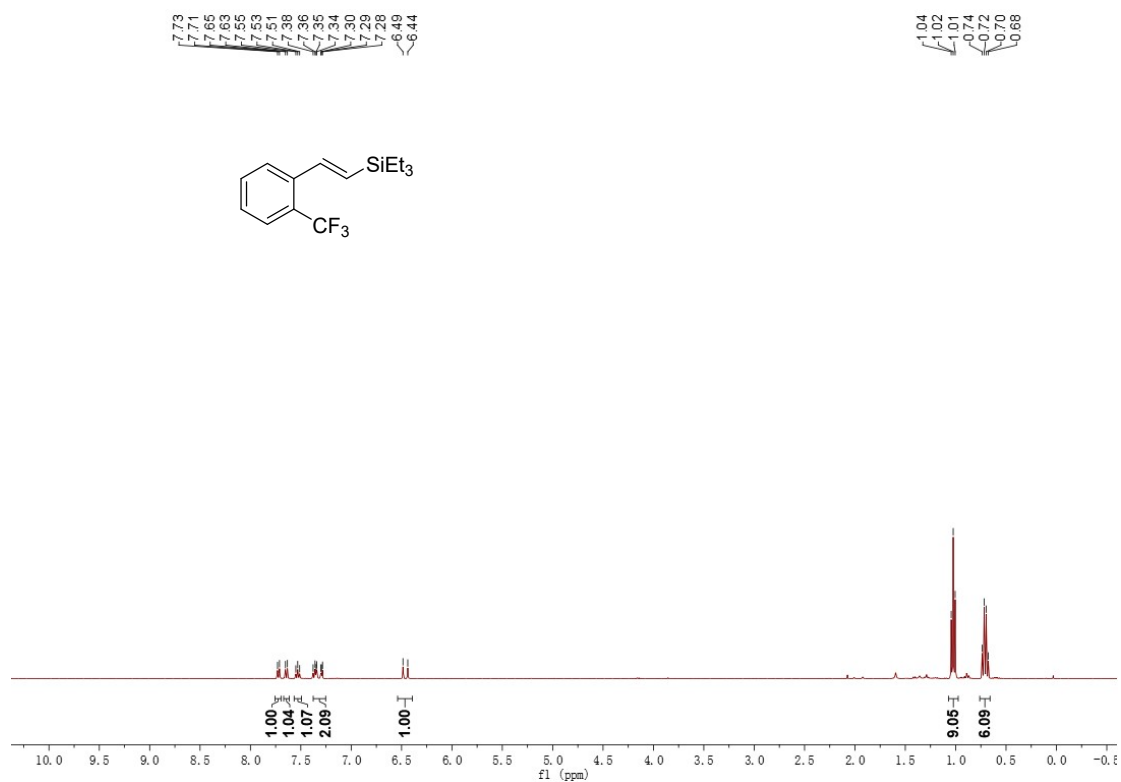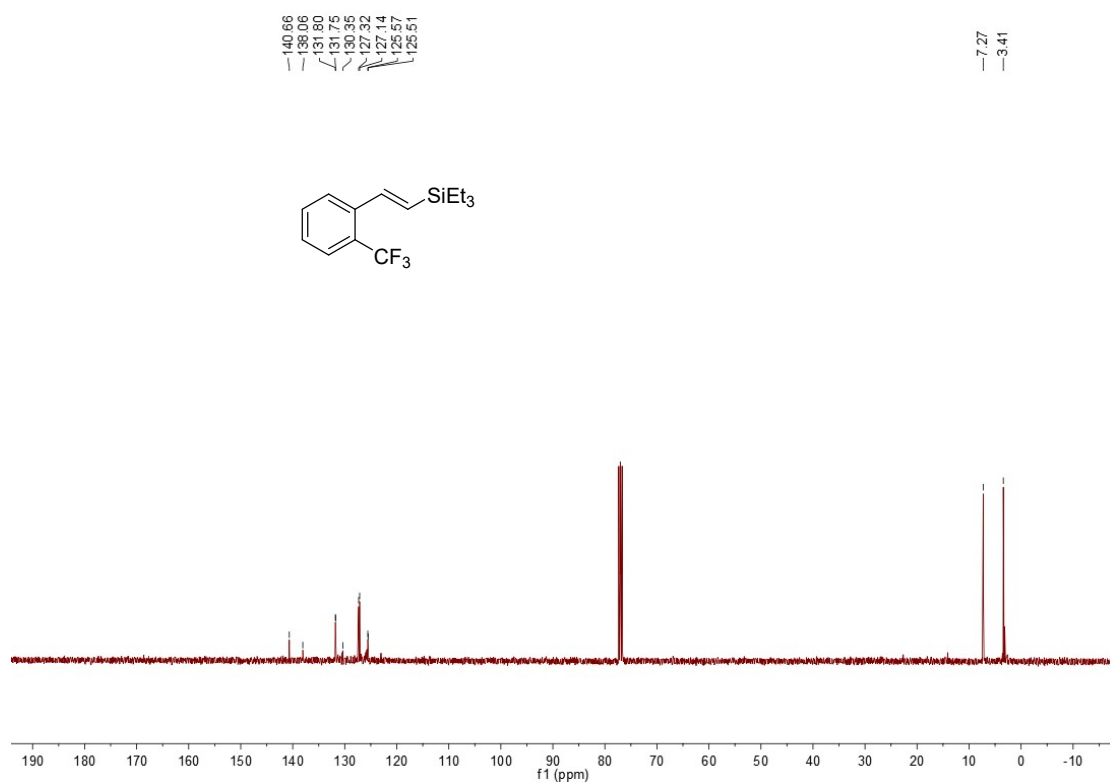



# (E)-triethyl(2-methoxystyryl)silane (5c)

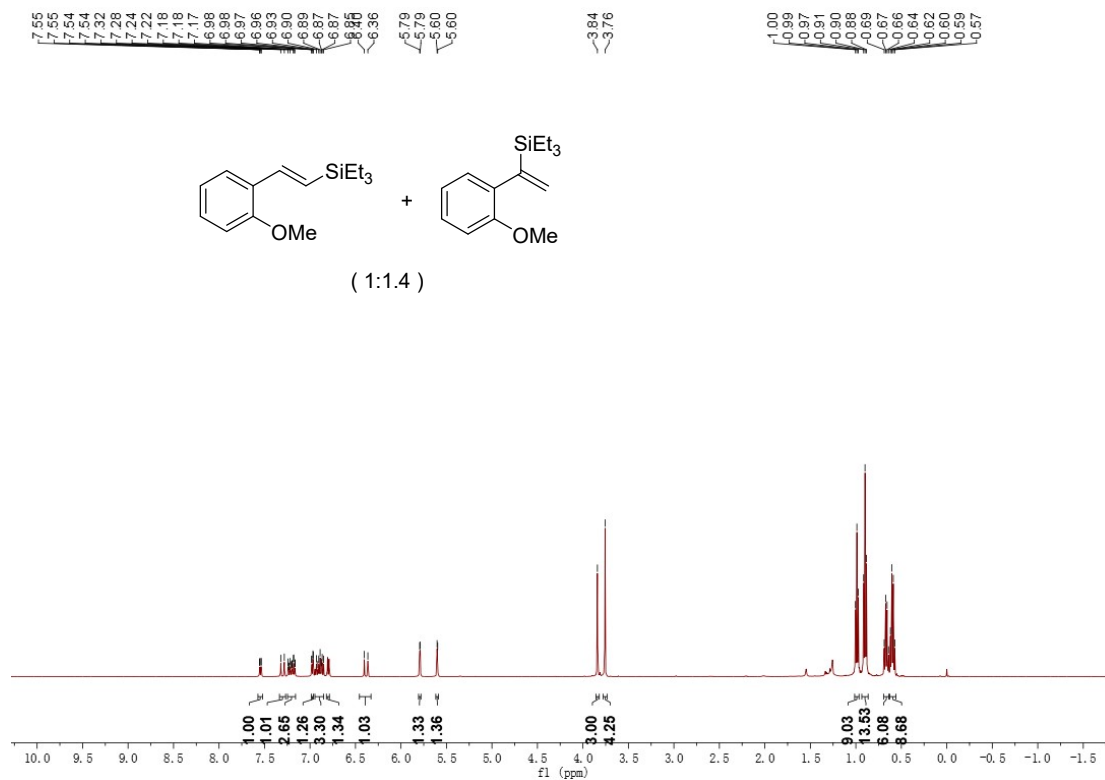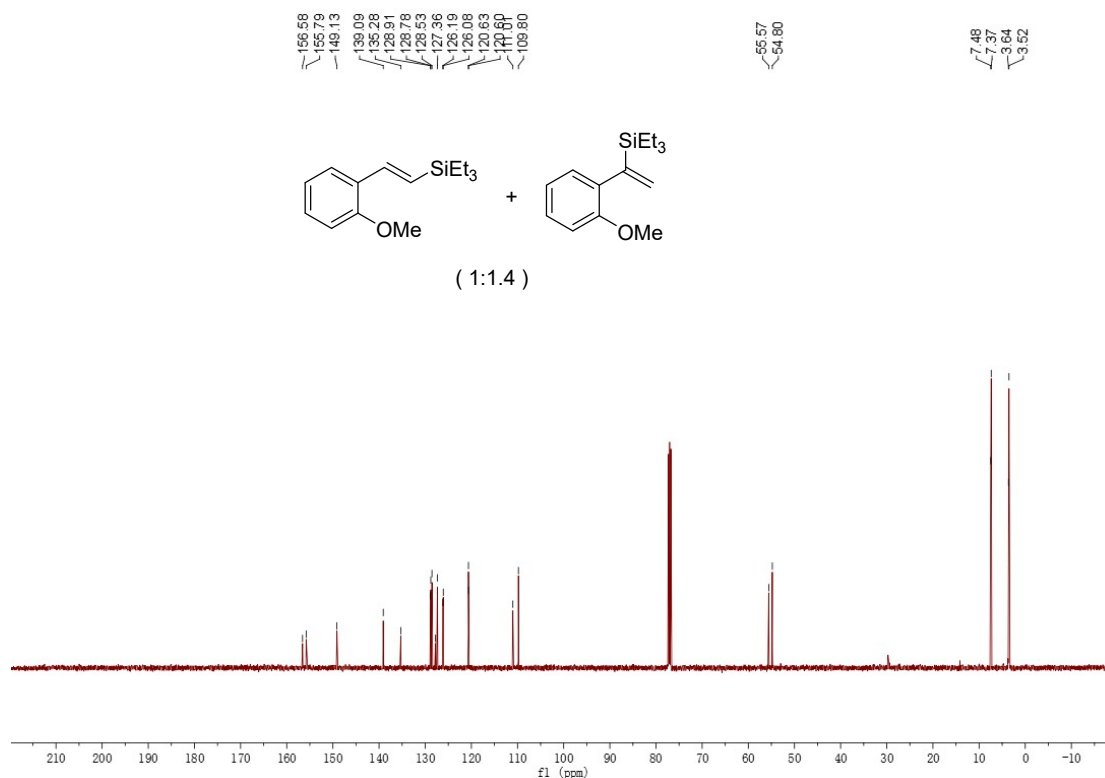

# 1-methoxy-4-(vinyl-d3)benzene (8)

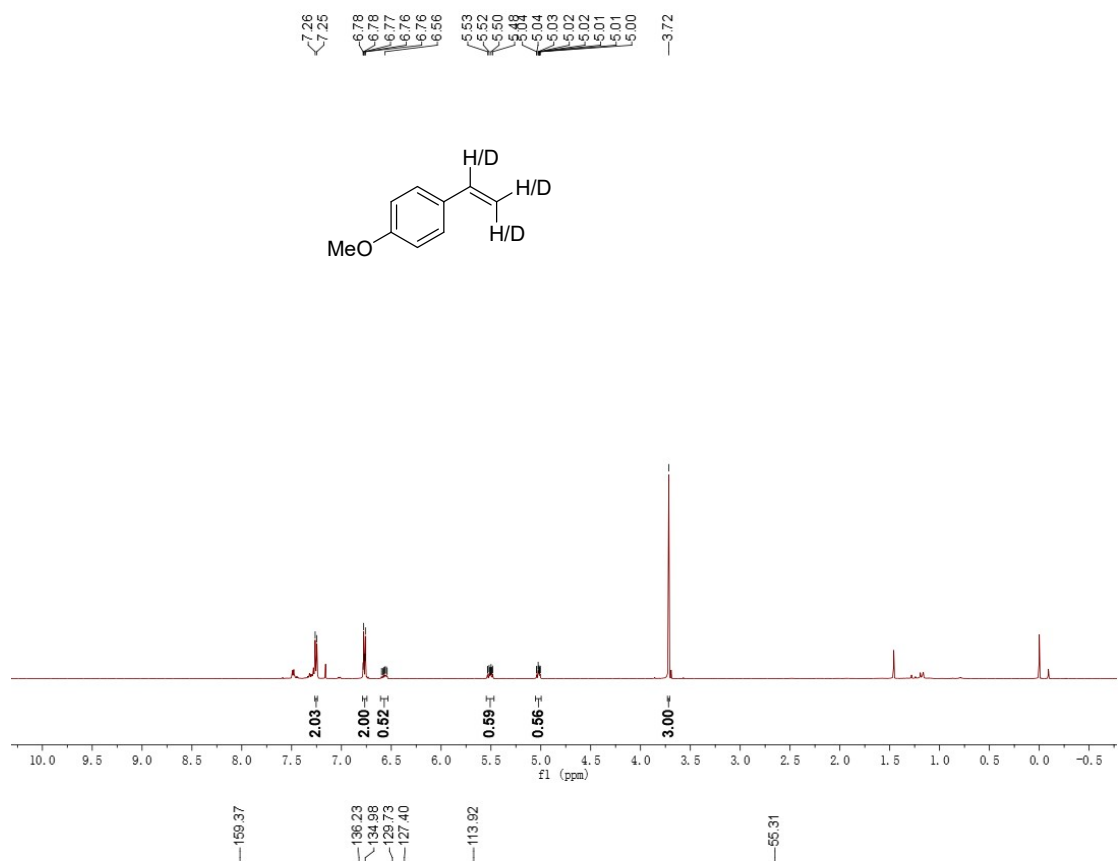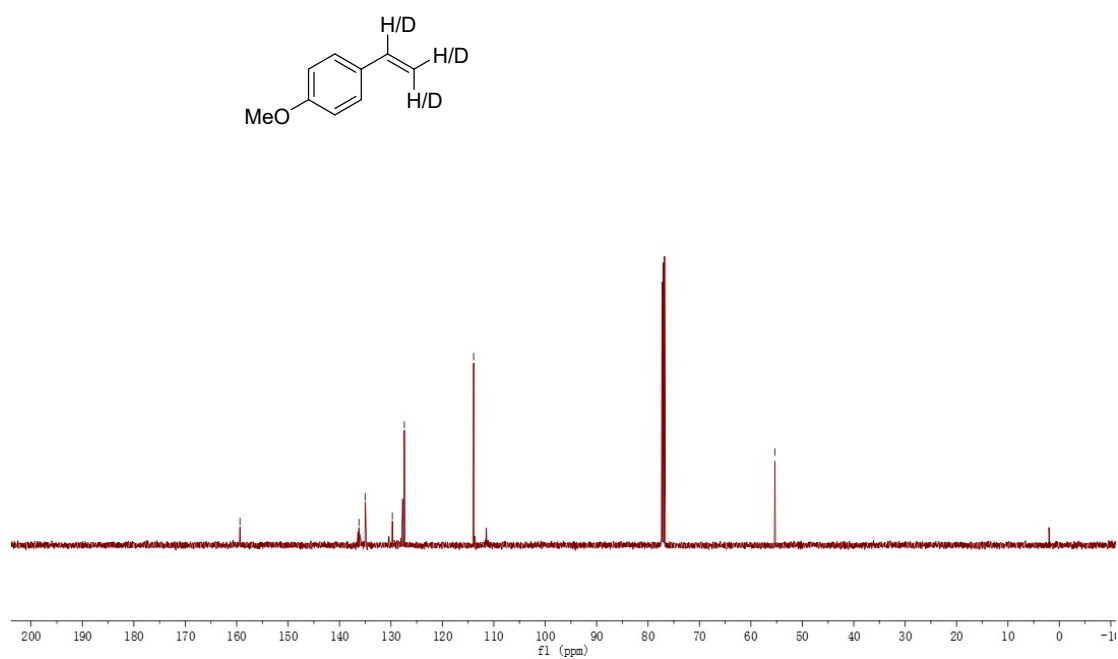

## IX. Reference

- (a) Vita, M. V.; Waser, J., Azidation of  $\beta$ -Keto Esters and Silyl Enol Ethers with a Benziodoxole Reagent. *Org. Lett.* **2013**, *15*, 3246–3249. (b) Jiang, L.; Wang, Z.; Armstrong, M.; Suero, M. G., beta-Diazocarbonyl Compounds: Synthesis and their Rh(II)-Catalyzed 1,3 C-H Insertions. *Angew. Chem. Int. Ed.* **2021**, *60*, 6177-6184. (c) Martins, B. S.; Kaiser, D.; Bauer, A.; Tiefenbrunner, I.; Maulide, N., Formal Enone  $\alpha$ -Arylation via I(III)-Mediated Aryl Migration/Elimination. *Org. Lett.* **2021**, *23*, 2094-2098. (d) Pouliot, M.; Renaud, P.; Schenk, K.; Studer, A.; Vogler, T., Oxidation of Catecholboron Enolates with TEMPO. *Angew. Chem. Int. Ed.* **2009**, *48*, 6037-6040. (e) Pramanik, S.; Rej, S.; Kando, S.; Tsurugi, H.; Mashima, K., Organosilicon Reducing Reagents for Stereoselective Formations of Silyl Enol Ethers from  $\alpha$ -Halo Carbonyl Compounds. *J. Org. Chem.* **2018**, *83*, 2409-2417.
- Gaussian 09, Revision E.01, Frisch, M. J.; Trucks, G. W.; Schlegel, H. B.; Scuseria, G. E.; Robb, M. A.; Cheeseman, J. R.; Scalmani, G.; Barone, V.; Mennucci, B.; Petersson, G. A.; Nakatsuji, H.; Caricato, M.; Li, X.; Hratchian, H. P.; Izmaylov, A. F.; Bloino, J.; Zheng, G.; Sonnenberg, J. L.; Hada, M.; Ehara, M.; Toyota, K.; Fukuda, R.; Hasegawa, J.; Ishida, M.; Nakajima, T.; Honda, Y.; Kitao, O.; Nakai, H.; Vreven, T.; Montgomery, J. A.; Peralta, Jr., J. E.; Ogliaro, F.; Bearpark, M.; Heyd, J. J.; Brothers, E.; Kudin, K. N.; Staroverov, V. N.; Keith, T.; Kobayashi, R.; Normand, J.; Raghavachari, K.; Rendell, A.; Burant, J. C.; Iyengar, S. S.; Tomasi, J.; Cossi, M.; Rega, N.; Millam, J. M.; Klene, M.; Knox, J. E.; Cross, J. B.; Bakken, V.; Adamo, C.; Jaramillo, J.; Gomperts, R.; Stratmann, R. E.; Yazyev, O.; Austin, A. J.; Cammi, R.; Pomelli, C.; Ochterski, J. W.; Martin, R. L.; Morokuma, K.; Zakrzewski, V. G.; Voth, G. A.; Salvador, P.; Dannenberg, J. J.; Dapprich, S.; Daniels, A. D.; Farkas, O.; Foresman, J. B.; Ortiz, J. V.; Cioslowski, J.; and Fox, D. J. Gaussian, Inc., Wallingford CT, **2013**.
- a) Becke, A. D. Density-Functional Thermochemistry. III. The Role of Exact Exchange. *J. Chem. Phys.* **1993**, *98*, 5648-5652. b) Lee, C.; Yang, W.; Parr, R. G. Development of the Colle-Salvetti Correlation-Energy Formula into A Functional of the Electron Density. *Phys. Rev. B*, **1988**, *37*, 785.
- Grimme, S.; Antony, J.; Ehrlich, S.; Krieg, H. A Consistent and Accurate *Ab Initio* Parametrization of Density Functional Dispersion Correction (DFT-D) for the 94 Elements H-Pu.

*J. Chem. Phys.* **2010**, *132*, 154104-154123.

5. a) Hay, P. J.; Wadt, W. R. *Ab Initio* Effective Core Potentials for Molecular Calculations. Potentials for K to Au Including the Outermost Core Orbitals. *J. Chem. Phys.* **1985**, *82*, 299-310.  
b) Roy, L. E.; Hay, P. J.; Martin, R. L. Revised Basis Sets for the LANL Effective Core Potentials. *J. Chem. Theory Comput.* **2008**, *4*, 1029-1031.
6. a) Ditchfield, R.; Hehre, W. J.; Pople, J. A. Self-Consistent Molecular-Orbital Methods. IX. An Extended Gaussian-Type Basis for Molecular-Orbital Studies of Organic Molecules. *J. Chem. Phys.* **1971**, *54*, 724-728. b) Hehre, W. J.; Ditchfield, R.; Pople, J. A. Self-Consistent Molecular Orbital Methods. XII. Further Extensions of Gaussian-Type Basis Sets for Use in Molecular Orbital Studies of Organic Molecules. *J. Chem. Phys.* **1972**, *56*, 2257-2261. c) Hariharan, P. C.; Pople, J. A. The Influence of Polarization Functions on Molecular Orbital Hydrogenation Energies. *Theor. Chem. Acc.* **1973**, *28*, 213-222.
7. a) Clark, T.; Chandrasekhar, J.; Spitznagel, G. W.; Schleyer, P. Von R. Efficient Diffuse Function-Augmented Basis Sets for Anion Calculations. III.† The 3-21+G Basis Set for First-Row Elements, Li–F. *J. Comput. Chem.* **1983**, *4*, 294-301. b) Krishnan, R.; Binkley, J. S.; Seeger, R.; Pople, J. A. Self-Consistent Molecular Orbital Methods. XX. A Basis Set for Correlated Wave Functions. *J. Chem. Phys.* **1980**, *72*, 650-654.
8. a) Dolg, M.; Wedig, U.; Stoll, H.; Preuss, H. Energy-Adjusted *Ab Initio* Pseudopotentials for the First Row Transition Elements. *J. Chem. Phys.* **1987**, *86*, 866-872. b) Nicklass, A.; Dolg, M.; Stoll, H.; Preuss, H. *Ab Initio* Energy-Adjusted Pseudopotentials for the Noble Gases Ne Through Xe: Calculation of Atomic Dipole and Quadrupole Polarizabilities. *J. Chem. Phys.* **1995**, *102*, 8942-8952.
9. Marenich, A. V.; Cramer, C. J.; Truhlar, D. G. Universal Solvation Model Based on Solute Electron Density and on a Continuum Model of the Solvent Defined by the Bulk Dielectric Constant and Atomic Surface Tensions. *J. Phys. Chem. B.* **2009**, *113*, 6378-6396.
10. Legault, C. Y. CYL View, version 1.0 b; Universite de Sherbrooke, Sherbrooke, Quebec, Canada, **2009**; <http://www.cylview.org>.
11. Alacid, E.; Na'jera, C., Aqueous Sodium Hydroxide Promoted Cross-Coupling Reactions of Alkenyltrialkoxysilanes under Ligand-Free Conditions. *J. Org. Chem.* **2008**, *73*, 2315-2322.
12. Shen, G.; Liu, H.; Chen, J.; He, Z.; Zhou, Y.; Wang, L.; Luo, Y.; Su, Z.; Fan, B., Zinc Salt-

Catalyzed Reduction of  $\alpha$ -Aryl Imino Esters, Diketones and Phenylacetylenes with Water as Hydrogen Source. *Org. Biomol. Chem.* **2021**, *19*, 3601-3610.

13. Smith, C. R.; Rajanbabu, T. V., Low Pressure Vinylation of Aryl and Vinyl Halides via Heck-Mizoroki Reactions Using Ethylene. *Tetrahedron* **2010**, *66*, 1102-1110.

14. Lebel, H.; Paquet, V., Rhodium-Catalyzed Methylenation of Aldehydes. *J. Am. Chem. Soc.* **2004**, *126*, 320-328.

15. Ashikari, Y.; Tamaki, T.; Kawaguchi, T.; Furusawa, M.; Yonekura, Y.; Ishikawa, S.; Takahashi, Y.; Aizawa, Y.; Nagaki, A., Switchable Chemoselectivity of Reactive Intermediates Formation and Their Direct Use in A Flow Microreactor. *Chem. Eur. J.* **2021**, *27*, 16107-16111.

16. Zhou, M. J.; Zhang, L.; Liu, G.; Xu, C.; Huang, Z., Site-Selective Acceptorless Dehydrogenation of Aliphatics Enabled by Organophotoredox/Cobalt Dual Catalysis. *J. Am. Chem. Soc.* **2021**, *143*, 16470-16485.

17. Xu, S.; Chen, R.; Fu, Z.; Zhou, Q.; Zhang, Y.; Wang, J., Palladium-Catalyzed Formal [4 + 1] Annulation via Metal Carbene Migratory Insertion and C(sp<sup>2</sup>)-H Bond Functionalization. *ACS Catal.* **2017**, *7*, 1993-1997.

18. Schuppe, A. W.; Knippel, J. L.; Borrajo-Calleja, G. M.; Buchwald, S. L., Enantioselective Hydroalkenylation of Olefins with Enol Sulfonates Enabled by Dual Copper Hydride and Palladium Catalysis. *J. Am. Chem. Soc.* **2021**, *143*, 5330-5335.

19. Ge, Q.; Meng, J.; Liu, H.; Yang, Z.; Wu, Z.; Zhang, W., Palladium-Catalyzed Long-Range Isomerization of Aryl Olefins. *Chin. J. Chem.* **2022**, *40*, 2269-2275.

20. Hodgson, D. M.; Fleming, M. J.; Stanway, S. J., The Reactivity of Epoxides with Lithium 2,2,6,6-Tetramethylpiperidide in Combination with Organolithiums or Grignard Reagents. *J. Org. Chem.* **2007**, *72*, 4763-4773.

21. Romano, C.; Mazet, C., Multicatalytic Stereoselective Synthesis of Highly Substituted Alkenes by Sequential Isomerization/Cross-Coupling Reactions. *J. Am. Chem. Soc.* **2018**, *140*, 4743-4750.

22. Zhang, K.; Rombach, D.; Notel, N. Y.; Jeschke, G.; Katayev, D., Radical Trifluoroacetylation of Alkenes Triggered by a Visible-Light-Promoted C-O Bond Fragmentation of Trifluoroacetic Anhydride. *Angew. Chem. Int. Ed.* **2021**, *60*, 22487-22495.

23. Tao, L.; Guo, X.; Li, J.; Li, R.; Lin, Z.; Zhao, W., Rhodium-Catalyzed Deoxygenation and

Borylation of Ketones: A Combined Experimental and Theoretical Investigation. *J. Am. Chem. Soc.* **2020**, *142*, 18118-18127.

24. Liu, Z.; Huo, J.; Fu, T.; Tan, H.; Ye, F.; Hossain, M. L.; Wang, J., Palladium(0)-Catalyzed C(sp<sup>3</sup>)-Si Bond Formation via Formal Carbene Insertion into a Si-H Bond. *Chem. Commun.* **2018**, *54*, 11419-11422.

25. Asai, K.; Hirano, K.; Miura, M., Palladium-Catalyzed Benzylic Silylation of Diarylmethyl Carbonates with Silylboranes under Base-Free Conditions. *Eur. J. Org. Chem.* **2022**, e202101535.

26. Guo, J.; Shen, X.; Lu, Z., Regio- and Enantioselective Cobalt-Catalyzed Sequential Hydrosilylation/Hydrogenation of Terminal Alkynes. *Angew. Chem. Int. Ed.* **2017**, *56*, 615-618.

27. Cui, B.; Jia, S.; Tokunaga, E.; Shibata, N., Defluorosilylation of Fluoroarenes and Fluoroalkanes. *Nat. Commun.* **2018**, *9*, 4393-4403.

28. Battace, A.; Zair, T.; Doucet, H.; Santelli, M., Selective Synthesis of (E)-triethyl(2-arylethenyl)silane Derivatives by Reaction of Aryl Bromides with Triethyl Vinylsilane Catalysed by a Palladium-Tetraphosphine Complex. *J. Org. Chem.* **2005**, *690*, 3790-3802.
